# Supplementary material for: Fine-Tuning the Aperture Size of Co-ZIF-67 via Dehydration, Demethylation, and Co-Zn Hybridization
Source: Research Square preprint supplement (doi:10.21203/rs.3.rs-7579437/v1), 2025-09-23
Supplement: Supplementary file 1 [file d85dbc3be64b94ac6cf010c9.docx]

###### Supporting Information

for

**Fine-Tuning the Aperture Size of Co-ZIF-67 via Dehydration, Demethylation, and Co-Zn Hybridization**

by

Hu Sik Kim, Ga Eon Song, Hyeonuk Choo, and Woo Taik Lim*

Department of Chemical and Biological Engineering, College of Engineering, Gyeongkuk National University, Andong 36729, Korea

Table S1. Summary of experimental and crystallographic data

|  | Crystal 1 | Crystal 2 | Crystal 3 | Crystal 4 | Crystal 5 |
| --- | --- | --- | --- | --- | --- |
| Crystal cross-section (μm) | 250 | 200 | 170 | 190 | 105 |
| Dehydration T (K/℃) | - | 673/400 | 683/410 | 688/415 | 693/420 |
| Dehydration P (Pa) | - | 6.5×10-6 | 5.8×10-6 | 6.1×10-6 | 6.5×10-6 |
| Dehydration Time (H) | - | 48 | 48 | 48 | 48 |
| Crystal color | Dark Purple | Dark Purple | Dark Purple | Dark Purple | Dark Purple |
| Mole ratio (Co:Zn) | 1:0 | 1:0 | 1:0 | 1:0 | 1:0 |
| Data collection T (K) | 100(1) | 100(1) | 100(1) | 100(1) | 100(1) |
| Space group, Z | *I*3*m*, 4 | *I3m, 4* | *I*3*m*, 4 | *I*3*m*, 4 | *I*3*m*, 4 |
| X-ray source | PLS*a* Beamline 2D SMC | | | | |
| Wavelength (Å) | 0.63000 | | | | |
| Detector to crystal distance, (mm) | 63 | 63 | 63 | 63 | 63 |
| Unit cell constant, *a* (Å) | 16.9810(20) | 16.9800(20) | 17.0130(20) | 16.9620(20) | 16.9760(20) |
| 2*θ* range in data collection (deg) | 58.60 | 52.97 | 61.83 | 59.61 | 54.97 |
| No. of unique reflections, m | 1,616 | 1,298 | 1,686 | 1,620 | 1,032 |
| No. of reflections with *F*o > 4σ(*F*o) | 1,314 | 989 | 1,339 | 1,255 | 954 |
| No. of variables, s | 41 | 34 | 39 | 40 | 36 |
| Data/parameter ratio, *m/s* | 39.4 | 38.2 | 43.2 | 40.5 | 28.7 |
| Weighting parameters, *a/b* | 0.0932/0.0000 | 0.0697/2.6499 | 0.0769/0.2871 | 0.1017/0.0000 | 0.0690/0.0247 |
| Final error indices |  |  |  |  |  |
| *R*1/*wR*2(Fo > 4σ(Fo))*b* | 0.0449/0.1195 | 0.0464/0.1264 | 0.0371/0.1066 | 0.0511/0.1265 | 0.0812/0.1152 |
| *R*1/*wR*2(all intensities)*c* | 0.0531/0.1413 | 0.0625/0.1703 | 0.0452/0.1299 | 0.0641/0.1587 | 0.0954/0.1353 |
| Goodness-of-fit*d* | 0.994 | 0.997 | 0.986 | 0.989 | 0.976 |

|  | Crystal 6 | Crystal 7 | Crystal 8 | Crystal 9 | Crystal 10 |
| --- | --- | --- | --- | --- | --- |
| Crystal cross-section (μm) | 105 | 120 | 145 | 135 | 230 |
| Dehydration T (K/℃) | 698/425 | 703/430 | 723/450 | 683/410 | 683/410 |
| Dehydration P (Pa) | 6.4×10-6 | 6.5×10-6 | 5.4×10-6 | 6.2×10-6 | 6.2×10-6 |
| Dehydration Time (H) | 48 | 48 | 48 | 54 | 60 |
| Crystal color | Dark Purple | Dark Purple | Deep Dark Purple | Dark Purple | Dark Purple |
| Mole ratio (Co:Zn) | 1:0 | 1:0 | 1:0 | 1:0 | 1:0 |
| Data collection T (K) | 100(1) | 100(1) | 100(1) | 100(1) | 100(1) |
| Space group, Z | *I*3*m*, 4 | *I*3*m*, 4 | *I3m, 4* | *I3m, 4* | *I3m, 4* |
| X-ray source | PLS*a* Beamline 2D SMC | | | | |
| Wavelength (Å) | 0.63000 | | | | |
| Detector to crystal distance, (mm) | 63 | 63 | 63 | 63 | 63 |
| Unit cell constant, *a* (Å) | 16.9860(20) | 16.9950(20) | 16.9650(20) | 16.9760(20) | 17.0410(20) |
| 2θ range in data collection (deg) | 59.06 | 54.85 | 54.31 | 54.93 | 54.95 |
| No. of unique reflections, m | 1,057 | 1,046 | 1,028 | 1,046 | 1,066 |
| No. of reflections with *F*o > 4σ(*F*o) | 893 | 1210 | 215 | 433 | 788 |
| No. of variables, *s* | 36 | 36 | 32 | 36 | 35 |
| Data/parameter ratio, *m/s* | 29.4 | 29.1 | 28.6 | 29.1 | 30.5 |
| Weighting parameters, *a/b* | 0.0807/0.0000 | 0.0255/0.0000 | 0.0860/0.0000 | 0.0669/0.0000 | 0.1605/0.0000 |
| Final error indices |  |  |  |  |  |
| *R*1/*wR*2(Fo > 4σ(Fo))*b* | 0.0359/0.0976 | 0.0334/0.0916 | 0.0703/0.1582 | 0.0863/0.1179 | 0.0844/0.1242 |
| *R*1/*wR*2(all intensities)*c* | 0.0558/0.1517 | 0.0445/0.1220 | 0.0854/0.1922 | 0.1077/0.1471 | 0.1231/0.1811 |
| Goodness-of-fit*d* | 0.960 | 0.992 | 0.956 | 0.954 | 0.986 |

|  | Crystal 11 | Crystal 12 | Crystal 13 |  |  |
| --- | --- | --- | --- | --- | --- |
| Crystal cross-section (μm) | 140 | 115 | 105 |  |  |
| Dehydration T (K/℃) | - | - | - |  |  |
| Dehydration P (Pa) | - | - | - |  |  |
| Dehydration Time (H) | - | - | - |  |  |
| Crystal color | Light Purple | Purple | Dark Purple |  |  |
| Mole ratio (Co:Zn) | 1:3 | 1:1 | 3:1 |  |  |
| Data collection T (K) | 100(1) | 100(1) | 100(1) |  |  |
| Space group, Z | *I*3*m*, 4 | *I*3*m*, 4 | *I3m, 4* |  |  |
| X-ray source | PLS*a* Beamline 2D SMC | | | | |
| Wavelength (Å) | 0.63000 | | |  |  |
| Detector to crystal distance, (mm) | 63 | 63 | 63 |  |  |
| Unit cell constant, *a* (Å) | 16.9240(20) | 16.9200(20) | 16.9080(20) |  |  |
| 2θ range in data collection (deg) | 58.26 | 55.52 | 64.92 |  |  |
| No. of unique reflections, m | 1,611 | 1,438 | 1,359 |  |  |
| No. of reflections with *F*o > 4σ(*F*o) | 1330 | 1169 | 1033 |  |  |
| No. of variables, *s* | 46 | 47 | 47 |  |  |
| Data/parameter ratio, *m/s* | 35.0 | 30.6 | 28.9 |  |  |
| Weighting parameters, *a/b* | 0.0975/0.0000 | 0.0956/0.0000 | 0.0935/0.0000 |  |  |
| Final error indices |  |  |  |  |  |
| *R*1/*wR*2(Fo > 4σ(Fo))*b* | 0.0432/0.1257 | 0.0428/0.1231 | 0.0501/0.1360 |  |  |
| *R*1/*wR*2(all intensities)*c* | 0.0544/0.1582 | 0.0535/0.1534 | 0.0643/0.1745 |  |  |
| Goodness-of-fit*d* | 1.016 | 0.990 | 1.054 |  |  |

*a*Beamline 2D-SMC at the Pohang Light Source, Korea. *bR*1 = Σ|*F*o-|*F*c||/Σ*F*o and *R*2 = [Σ*w*(*F*o2-*F*c2)2/Σ*w*(*F*o2)2]1/2; *R*1 and *wR*2 are calculated using only the reflections for which *F*o > 4σ(*F*o). *cR*1 and *wR*2 are calculated using all unique reflections measured. *d*Goodness-of-fit = (Σ*w*(*F*o2-*F*c2)2/(*m*-*s*))1/2, where *m* and *s* are the number of unique reflections and variables, respectively.

Table S2. Positional, Thermal, and Occupancy Parameters*a* of Crystals 1 to 13

| atom | Wyckoff position |  | x | y | z | *U*11*b* or *U*iso | *U*22 | *U*33 | *U*23 | *U*13 | *U12* | Occupancy*c* |  |
| --- | --- | --- | --- | --- | --- | --- | --- | --- | --- | --- | --- | --- | --- |
|  |
| **crystal 1 (in situ Co-ZIF-67)** | | | | | | | | | | | | | |
| Co1 | 12(*d*) |  | 0 | 5000 | 7500 | 655(3) | 655(3) | 638(3) | 0 | 0 | 0 | 12 |  |
| N1 | 48(*h*) |  | 898(1) | 5332(1) | 8176(1) | 687(10) | 661(9) | 684(10) | 18(8) | -30(8) | -23(8) | 48 |  |
| C1 | 24(*g*) |  | 1233(1) | 4935(3) | 8767(1) | 675(8) | 635(17) | 675(8) | 8(10) | 6(10) | -8(10) | 24 |  |
| C2 | 48(*h*) |  | 1864(2) | 6041(2) | 8698(2) | 790(14) | 675(12) | 821(15) | 72(10) | -91(12) | -90(10) | 48 |  |
| C3 | 24(*g*) |  | 955(2) | 4144(2) | 9045(2) | 808(13) | 713(17) | 808(13) | 82(12) | -10(16) | -88(12) | 24 |  |
| O1 | 8(*c*) |  | 1866(17) | 8134(17) | 8134(17) | 2199(193) | 2199(193) | 2199(193) | 531(173) | -531(173) | -531(173) | **5.0(5)** |  |
| O2 | 8(*c*) |  | 3194(36) | 6806(36) | 6806(36) | 3083(783) | 3083(783) | 3083(783) | -86(534) | 86(534) | 86(534) | **2.9(7)** |  |
| H2*d* | 48(*h*) |  | 2218 | 6446 | 8798 | 913 |  |  |  |  |  |  |  |
| H3a*d* | 24(*g)* |  | 1395 | 3791 | 9074 | 1164 |  |  |  |  |  |  |  |
| H3b*d* | 24(*g*) |  | 573 | 3941 | 8681 | 1164 |  |  |  |  |  |  |  |
| H3c*d* | 24(*g*) |  | 720 | 4195 | 9557 | 1164 |  |  |  |  |  |  |  |
|  |  |  |  |  |  |  |  |  |  |  |  |  |  |
| **crystal 2 (fully dehydrated at 673 K)** | | | | | | | | | | | | | |
| Co1 | 12(*d*) |  | 0 | 5000 | 7500 | 612(4) | 612(4) | 594(5) | 0 | 0 | 0 | 12 |  |
| N1 | 48(*h*) |  | 901(2) | 5322(2) | 8171(2) | 668(18) | 593(15) | 651(17) | 21(13) | -59(15) | -60(14) | 48 |  |
| C1 | 24(*g*) |  | 1228(2) | 4939(6) | 8772(2) | 676(16) | 614(32) | 676(16) | 27(23) | 26(20) | -27(23) | 24 |  |
| C2 | 48(*h*) |  | 1873(3) | 6022(3) | 8684(3) | 751(26) | 644(21) | 788(25) | 45(19) | -66(19) | -76(19) | 48 |  |
| C3 | 24(*g*) |  | 940(3) | 4150(4) | 9060(3) | 759(21) | 726(35) | 759(21) | 75(22) | -111(31) | -75(22) | 24 |  |
| H2*d* | 48(*h*) |  | 2231 | 6426 | 8776 | 873 |  |  |  |  |  |  |  |
| H3a*d* | 24(*g)* |  | 1258 | 3981 | 9796 | 1122 |  |  |  |  |  |  |  |
| H3b*d* | 24(*g*) |  | 401 | 4200 | 9226 | 1122 |  |  |  |  |  |  |  |
| H3c*d* | 24(*g*) |  | 978 | 3772 | 8642 | 1122 |  |  |  |  |  |  |  |
|  |  |  |  |  |  |  |  |  |  |  |  |  |  |
| **crystal 3 (dehydrated at 683 K)** | | | | | | | | | | | | | |
| Co1 | 12(*d*) |  | 0 | 5000 | 7500 | 874(8) | 874(8) | 811(11) | 0 | 0 | 0 | 12 |  |
| N1 | 48(*h*) |  | 896(3) | 5309(3) | 8171(3) | 927(41) | 896(47) | 876(38) | 24(30) | -74(30) | -89(30) | 48 |  |
| C1 | 24(*g*) |  | 1228(4) | 4919(9) | 8772(4) | 919(36) | 785(72) | 919(36) | -43(54) | -79(50) | 43(54) | 24 |  |
| C2 | 48(*h*) |  | 1863(4) | 6001(4) | 8689(4) | 1165(58) | 9337(54) | 1150(56) | 150(47) | -206(45) | -150(43) | 48 |  |
| C3 | 24(*g*) |  | 937(5) | 4147(6) | 9067(5) | 1055(64) | 866(97) | 1055(64) | 137(49) | -107(72) | -137(49) | **23.6(5)** |  |
| H2*d* | 48(*h*) |  | 2219 | 6408 | 8780 | 1300 |  |  |  |  |  |  |  |
| H3a*d* | 24(*g)* |  | 516 | 3964 | 8732 | 1488 |  |  |  |  |  |  |  |
| H3b*d* | 24(*g*) |  | 737 | 4209 | 9594 | 1488 |  |  |  |  |  |  |  |
| H3c*d* | 24(*g*) |  | 1355 | 3771 | 9067 | 1488 |  |  |  |  |  |  |  |
|  |  |  |  |  |  |  |  |  |  |  |  |  |  |
| **crystal 4 (dehydrated at 688 K)** | | | | | | | | | | | | | |
| Co1 | 12(*d*) |  | 0 | 5000 | 7500 | 1060(10) | 1060(10) | 988(14) | 0 | 0 | 0 | 12 |  |
| N1 | 48(*h*) |  | 899(4) | 5310(5) | 8170(4) | 1080(60) | 1071(66) | 1062(50) | 91(44) | -137(39) | -94(42) | 48 |  |
| C1 | 24(*g*) |  | 1230(4) | 4942(13) | 8770(4) | 999(55) | 1016(116) | 999(55) | -80(77) | 125(88) | 80(77) | 24 |  |
| C2 | 48(*h*) |  | 1876(4) | 6003(5) | 8689(4) | 1233(69) | 1050(60) | 1371(65) | 217(52) | -116(52) | -214(48) | 48 |  |
| C3 | 24(*g*) |  | 927(5) | 4150(8) | 9073(5) | 1301(77) | 1175(135) | 1301(77) | 205(74) | -309(84) | 1205(74) | **23.4(6)** |  |
| H2*d* | 48(*h*) |  | 2237 | 6408 | 8782 | 1462 |  |  |  |  |  |  |  |
| H3a*d* | 24(*g)* |  | 512 | 3964 | 8734 | 1889 |  |  |  |  |  |  |  |
| H3b*d* | 24(*g*) |  | 728 | 4212 | 9600 | 1889 |  |  |  |  |  |  |  |
| H3c*d* | 24(*g*) |  | 1352 | 3773 | 9074 | 1889 |  |  |  |  |  |  |  |
|  |  |  |  |  |  |  |  |  |  |  |  |  |  |
| **crystal 5 (dehydrated at 693 K)*e*** | | | | | | | | | | | | | |
| Co1 | 12(*d*) |  | 0 | 5000 | 7500 | 1060(10) | 1060(10) | 988(14) | 0 | 0 | 0 | 12 |  |
| N1 | 48(*h*) |  | 899(4) | 5310(5) | 8170(4) | 1080(60) | 1071(66) | 1062(50) | 91(44) | -137(39) | -94(42) | 48 |  |
| C1 | 24(*g*) |  | 1230(4) | 4942(13) | 8770(4) | 999(55) | 1016(116) | 999(55) | -80(77) | 125(88) | 80(77) | 24 |  |
| C2 | 48(*h*) |  | 1876(4) | 6003(5) | 8689(4) | 1233(69) | 1050(60) | 1371(65) | 217(52) | -116(52) | -214(48) | 48 |  |
| C3 | 24(*g*) |  | 927(5) | 4150(8) | 9073(5) | 1301(77) | 1175(135) | 1301(77) | 205(74) | -309(84) | 1205(74) | **23.0(6)** |  |
| H2*d* | 48(*h*) |  | 2237 | 6408 | 8782 | 1462 |  |  |  |  |  |  |  |
| H3a*d* | 24(*g)* |  | 512 | 3964 | 8734 | 1889 |  |  |  |  |  |  |  |
| H3b*d* | 24(*g*) |  | 728 | 4212 | 9600 | 1889 |  |  |  |  |  |  |  |
| H3c*d* | 24(*g*) |  | 1352 | 3773 | 9074 | 1889 |  |  |  |  |  |  |  |
|  |  |  |  |  |  |  |  |  |  |  |  |  |  |
| **crystal 6 (dehydrated at 698 K *e*** | | | | | | | | | | | | | |
| Co1 | 12(*d*) |  | 0 | 5000 | 7500 | 1257(14) | 1257(14) | 1142(20) | 0 | 0 | 0 | 12 |  |
| N1 | 48(*h*) |  | 909(6) | 5315(6) | 8164(5) | 1497(89) | 1092(90) | 1189(69) | 193(62) | -51(59) | -20(58) | 48 |  |
| C1 | 24(*g*) |  | 1227(6) | 4944(16) | 8773(6) | 1344(92) | 891(146) | 1344(92) | 103(92) | 240(136) | -103(92) | 24 |  |
| C2 | 48(*h*) |  | 1308(5) | 6009(6) | 8127(5) | 1669(96) | 1149(84) | 1595(101) | 305(68) | -151(74) | -198(70) | 48 |  |
| C3 | 24(*g*) |  | 934(7) | 4162(12) | 9066(7) | 1423(107) | 1363(217) | 1422(107) | 137(103) | -241(112) | -137(103) | **22.6(4)** |  |
| H2*d* | 48(*h*) |  | 1209 | 6418 | 7701 | 1765 |  |  |  |  |  |  |  |
| H3a*d* | 24(*g)* |  | 412 | 4225 | 9283 | 2104 |  |  |  |  |  |  |  |
| H3b*d* | 24(*g*) |  | 1284 | 3967 | 9469 | 2104 |  |  |  |  |  |  |  |
| H3c*d* | 24(*g*) |  | 916 | 3792 | 8635 | 2104 |  |  |  |  |  |  |  |
| **crystal 7 (dehydrated at 703 K)*e*** | | | | | | | | | | | | | |
| Co1 | 12(*d*) |  | 0 | 5000 | 7500 | 1060(10) | 1060(10) | 988(14) | 0 | 0 | 0 | 12 |  |
| N1 | 48(*h*) |  | 899(4) | 5310(5) | 8170(4) | 1080(60) | 1071(66) | 1062(50) | 91(44) | -137(39) | -94(42) | 48 |  |
| C1 | 24(*g*) |  | 1230(4) | 4942(13) | 8770(4) | 999(55) | 1016(116) | 999(55) | -80(77) | 125(88) | 80(77) | 24 |  |
| C2 | 48(*h*) |  | 1876(4) | 6003(5) | 8689(4) | 1233(69) | 1050(60) | 1371(65) | 217(52) | -116(52) | -214(48) | 48 |  |
| C3 | 24(*g*) |  | 927(5) | 4150(8) | 9073(5) | 1301(77) | 1175(135) | 1301(77) | 205(74) | -309(84) | 1205(74) | **22.9(3)** |  |
| H2*d* | 48(*h*) |  | 2237 | 6408 | 8782 | 1462 |  |  |  |  |  |  | |
| H3a*d* | 24(*g)* |  | 512 | 3964 | 8734 | 1889 |  |  |  |  |  |  | |
| H3b*d* | 24(*g*) |  | 728 | 4212 | 9600 | 1889 |  |  |  |  |  |  | |
| H3c*d* | 24(*g*) |  | 1352 | 3773 | 9074 | 1889 |  |  |  |  |  |  | |
|  |  |  |  |  |  |  |  |  |  |  |  |  | |
| **crystal 8 (dehydrated at 723 K)*e*** | | | | | | | | | | | | | |
| Co1 | 12(*d*) |  | 0 | 5000 | 7500 | 1060(10) | 1060(10) | 988(14) | 0 | 0 | 0 | 12 |  |
| N1 | 48(*h*) |  | 899(4) | 5310(5) | 8170(4) | 1080(60) | 1071(66) | 1062(50) | 91(44) | -137(39) | -94(42) | 48 |  |
| C1 | 24(*g*) |  | 1230(4) | 4942(13) | 8770(4) | 999(55) | 1016(116) | 999(55) | -80(77) | 125(88) | 80(77) | 24 |  |
| C2 | 48(*h*) |  | 1876(4) | 6003(5) | 8689(4) | 1233(69) | 1050(60) | 1371(65) | 217(52) | -116(52) | -214(48) | 48 |  |
| C3 | 24(*g*) |  | 927(5) | 4150(8) | 9073(5) | 1301(77) | 1175(135) | 1301(77) | 205(74) | -309(84) | 1205(74) | **23.1(8)** |  |
| H2*d* | 48(*h*) |  | 2237 | 6408 | 8782 | 1462 |  |  |  |  |  |  |  |
| H3a*d* | 24(*g)* |  | 512 | 3964 | 8734 | 1889 |  |  |  |  |  |  |  |
| H3b*d* | 24(*g*) |  | 728 | 4212 | 9600 | 1889 |  |  |  |  |  |  |  |
| H3c*d* | 24(*g*) |  | 1352 | 3773 | 9074 | 1889 |  |  |  |  |  |  |  |
|  |  |  |  |  |  |  |  |  |  |  |  |  |  |
| **crystal 9 (dehydrated at 683 K for 54 h)** | | | | | | | | | | | | | |
| Co1 | 12(*d*) |  | 0 | 5000 | 7500 | 1032(12) | 1039(11) | 977(15) | 0 | 0 | 0 | 12 |  |
| N1 | 48(*h*) |  | 900(4) | 5317(5) | 8168(4) | 991(58) | 1073(70) | 1064(53) | 112(48) | -129(41) | -112(43) | 48 |  |
| C1 | 24(*g*) |  | 1235(5) | 4932(13) | 8765(5) | 1019(54) | 833(101) | 1019(54) | -47(76) | 35(83) | 47(76) | 24 |  |
| C2 | 48(*h*) |  | 1313(4) | 6011(5) | 8128(4) | 1303(72) | 1035(68) | 1302(77) | 202(54) | -195(58) | -204(57) | 48 |  |
| C3 | 24(*g*) |  | 930(6) | 4151(9) | 9070(6) | 1253(85) | 1064(148) | 1253(85) | 181(74) | -320(93) | -181(74) | **22.3(4)** |  |
| H2*d* | 48(*h*) |  | 1219 | 6418 | 7768 | 1456 |  |  |  |  |  |  |  |
| H3a*d* | 24(*g)* |  | 399 | 4218 | 9265 | 1785 |  |  |  |  |  |  |  |
| H3b*d* | 24(*g*) |  | 1265 | 3969 | 9492 | 1785 |  |  |  |  |  |  |  |
| H3c*d* | 24(*g*) |  | 931 | 3770 | 8649 | 1785 |  |  |  |  |  |  |  |
|  |  |  |  |  |  |  |  |  |  |  |  |  |  |
| **crystal 10 (dehydrated at 683 K for 60 h)** | | | | | | | | | | | | | |
| Co1 | 12(*d*) |  | 0 | 5000 | 7500 | 844(7) | 844(7) | 781(10) | 0 | 0 | 0 | 12 |  |
| N1 | 48(*h*) |  | 899(3) | 5313(3) | 8171(3) | 866(36) | 856(40) | 824(34) | 20(27) | -92(27) | -22(27) | 48 |  |
| C1 | 24(*g*) |  | 1229(3) | 4937(9) | 8771(3) | 835(31) | 788(60) | 835(31) | -19(49) | -52(42) | 19(49) | 24 |  |
| C2 | 48(*h*) |  | 1869(4) | 6006(4) | 8690(4) | 1096(54) | 918(49) | 1115(53) | 207(43) | -15(42) | -203(40) | 48 |  |
| C3 | 24(*g*) |  | 934(5) | 4147(6) | 9066(5) | 1152(63) | 916(87) | 1152(63) | 172(49) | -200(73) | -172(49) | **19.3(11)** |  |
| H2*d* | 48(*h*) |  | 2252 | 6411 | 8783 | 1252 |  |  |  |  |  |  |  |
| H3a*d* | 24(*g)* |  | 517 | 3964 | 8731 | 1610 |  |  |  |  |  |  |  |
| H3b*d* | 24(*g*) |  | 741 | 4203 | 9594 | 1610 |  |  |  |  |  |  |  |
| H3c*d* | 24(*g*) |  | 1359 | 3773 | 9059 | 1610 |  |  |  |  |  |  |  |
|  |  |  |  |  |  |  |  |  |  |  |  |  |  |
| **crystal 11 (Co/Zn-ZIF-67, no dehydrated)** | | | | | | | | | | | | | |
| Co1 | 12(*d*) |  | 71(5) | 4935(6) | 7558(6) | 389(25) |  |  |  |  |  | 8.3(2) |  |
| Zn1 | 12(*d*) |  | 0 | 5000 | 7500 | 284(123) | 284(123) | 329(115) | 0 | 0 | 0 | 3.7(2) |  |
| N1 | 48(*h*) |  | 893(2) | 5345(2) | 8177(2) | 543(11) | 549(11) | 566(12) | 18(9) | -44(9) | -22(9) | 48 |  |
| C1 | 24(*g*) |  | 1236(1) | 4934(4) | 8764(1) | 545(9) | 480(22) | 545(9) | 2(12) | 22(11) | -2(12) | 24 |  |
| C2 | 48(*h*) |  | 1845(2) | 6063(2) | 8714(2) | 715(18) | 545(13) | 682(17) | 63(12) | -88(14) | -123(12) | 48 |  |
| C3 | 24(*g*) |  | 972(2) | 4135(3) | 9028(2) | 705(15) | 554(19) | 705(15) | 79(13) | -137(19) | -79(13) | 24 |  |
| O1 | 8(c) |  | 1923(12) | 8077(12) | 8077(12) | 1363(92) |  |  |  |  |  | 3.9(1) |  |
| O2 | 8(c) |  | 3209(22) | 6791(22) | 6791(22) | 2823(346) |  |  |  |  |  | 4.1(1) |  |
| H2*d* | 48(*h*) |  | 2191 | 6477 | 8821 | 777 |  |  |  |  |  |  |  |
| H3a*d* | 24(*g)* |  | 1303 | 3957 | 9453 | 981 |  |  |  |  |  |  |  |
| H3b*d* | 24(*g*) |  | 434 | 4163 | 9207 | 981 |  |  |  |  |  |  |  |
| H3c*d* | 24(*g*) |  | 1008 | 3771 | 8595 | 981 |  |  |  |  |  |  |  |
|  |  |  |  |  |  |  |  |  |  |  |  |  |  |
| **crystal 12 (Co/Zn-ZIF-67, no dehydrated)** | | | | | | | | | | | | | |
| Co1 | 12(*d*) |  | 84 | 4926(6) | 7574(6) | 363(36) |  |  |  |  |  | 7.5(1) |  |
| Zn1 | 12(*d*) |  | 0 | 5000 | 7500 | 470(90) | 470(90) | 494(87) | 0 | 0 | 0 | 4.5(1) |  |
| N1 | 48(*h*) |  | 891(2) | 5348(2) | 8178(2) | 599(15) | 592(14) | 605(15) | 29(12) | -36(12) | -42(12) | 48 |  |
| C1 | 24(*g*) |  | 1236(1) | 4939(5) | 8764(2) | 590(12) | 570(27) | 591(12) | 3(18) | 4(15) | -3(18) | 24 |  |
| C2 | 48(*h*) |  | 1845(3) | 6067(2) | 8716(3) | 769(23) | 581(17) | 738(21) | 59(16) | -121(18) | -95(16) | 48 |  |
| C3 | 24(*g*) |  | 972(3) | 4136(3) | 9029(3) | 748(19) | 611(25) | 748(19) | 78(18) | -126(24) | -78(18) | 24 |  |
| O1 | 8(c) |  | 1901(10) | 8099(10) | 8099(10) | 1699(91) |  |  |  |  |  | 6.1(1) |  |
| O2 | 8(c) |  | 3335(38) | 6665(38) | 6665(38) | 3038(373) |  |  |  |  |  | 1.9(1) |  |
| H2*d* | 48(*h*) |  | 2191 | 6481 | 8823 | 835 |  |  |  |  |  |  |  |
| H3a*d* | 24(*g)* |  | 488 | 3998 | 8764 | 1053 |  |  |  |  |  |  |  |
| H3b*d* | 24(*g*) |  | 886 | 4141 | 9589 | 1053 |  |  |  |  |  |  |  |
| H3c*d* | 24(*g*) |  | 1371 | 3754 | 8901 | 1053 |  |  |  |  |  |  |  |
|  |  |  |  |  |  |  |  |  |  |  |  |  |  |
| **crystal 13 (Co/Zn-ZIF-67, no hydrated)** | | | | | | | | | | | | | |
| Co1 | 12(*d*) |  | 74(6) | 4939(7) | 7564(8) | 488(22) |  |  |  |  |  | 9.4(1) |  |
| Zn1 | 12(*d*) |  | 0 | 5000 | 7500 | 346(135) | 346(135) | 330(198) | 0 | 0 | 0 | 2.6(1) |  |
| N1 | 48(*h*) |  | 890(2) | 5346(2) | 8176(2) | 666(18) | 662(16) | 701(19) | 10(14) | -49(14) | -28(15) | 48 |  |
| C1 | 24(*g*) |  | 1239(2) | 4937(6) | 8761(2) | 667(15) | 614(32) | 667(15) | 37(22) | 15(18) | -37(22) | 24 |  |
| C2 | 48(*h*) |  | 1844(3) | 6070(3) | 8711(3) | 870(28) | 654(21) | 824(26) | 66(19) | -112(21) | -126(20) | 48 |  |
| C3 | 24(*g*) |  | 976(3) | 4133(4) | 9024(3) | 851(24) | 695(31) | 851(24) | 78(22) | -154(31) | -78(22) | 24 |  |
| O1 | 8(c) |  | 1936(13) | 8064(13) | 8064(13) | 1149(92) |  |  |  |  |  | 4.9(1) |  |
| O2 | 8(c) |  | 3161(32) | 6839(32) | 6839(32) | 1785(332) |  |  |  |  |  | 3.1(1) |  |
| H2*d* | 48(*h*) |  | 2190 | 6484 | 8817 | 939 |  |  |  |  |  |  |  |
| H3a*d* | 24(*g)* |  | 504 | 3987 | 8744 | 1198 |  |  |  |  |  |  |  |
| H3b*d* | 24(*g*) |  | 869 | 4143 | 9582 | 1198 |  |  |  |  |  |  |  |
| H3c*d* | 24(*g*) |  | 1385 | 3755 | 8916 | 1198 |  |  |  |  |  |  |  |

*a*Positional and thermal parameters × 104 are given. Numbers in parentheses are the esds in the units of the least significant figure given for the corresponding parameter. *b*The anisotropic temperature factor is exp[-2π2*a*-2(*U*11*h*2 + *U*22*k*2 + *U*33*l*2 + 2*U*23*kl* + 2*U*13*hl* + 2*U*12*hk*)]. *c*The Occupancy factor is given as the number of atoms. *d*Hydrogen atom positions were calculated by the suite of computer programs SHELXL-2017.

Table S3. Selected Interatomic Distances (Å) and Angles (deg)*a*

|  | **crystal 1** | **crystal 2** | **crystal 3** | **crystal 4** | **crystal 5** | **crystal 6** | **crystal 7** | **crystal 8** | **crystal 9** | **crystal 10** | **crystal 11** | **crystal 12** | **crystal 13** |
| --- | --- | --- | --- | --- | --- | --- | --- | --- | --- | --- | --- | --- | --- |
| Co1-N1 | 1.9906(21) | 1.9936(19) | 1.9928(19) | 1.9945(19) | 1.9895(10) | 1.9888(11) | 1.9887(10) | 1.9887(11) | 1.9879(10) | 1.9877(10) | 1.9852(11) | 1.9864(9) | 2.0101(14) |
| Zn1-N1 |  |  |  |  |  |  |  |  |  |  | 1.9829(23) | 1.9834(29) | 1.9779(3) |
| N1-C1 | 1.337(4) | 1.337(3) | 1.337(3) | 1.336(3) | 1.3402(17) | 1.3408(16) | 1.3405(16) | 1.3414(16) | 1.3408(17) | 1.3399(16) | 1.338(5) | 1.343(6) | 1.343(3) |
| N1-C2 | 1.355(7) | 1.378(3) | 1.379(3) | 1.362(5) | 1.3818(17) | 1.3822(17) | 1.3816(16) | 1.3824(17) | 1.362(3) | 1.3822(15) | 1.3831(4) | 1.387(5) | 1.398(5) |
| C1-C3 | 1.511(9) | 1.495(5) | 1.496(5) | 1.497(6) | 1.494(3) | 1.494(3) | 1.4980(3) | 1.493(3) | 1.497(3) | 1.4976(3) | 1.474(8) | 1.499(10) | 1.498(11) |
| C2-H2 | 0.930 | 0.930 | 0.930 | 0.930 | 0.930 | 0.930 | 0.930 | 0.930 | 0.930 | 0.930 | 0.930 | 0.930 | 0.930 |
| H2-O1 | 3.119 | - | - | - | - | - | - | - | - | - | 3.021 | 3.040 | 2.990 |
| H2-O2 | 3.786 | - | - | - | - | - | - | - | - | - | 3.881 | 4.044 | 3.773 |
|  |  |  |  |  |  |  |  |  |  |  |  |  |  |
| N1-Co1-N1 | 109.39(8) | 109.47(6) | 109.45(6) | 109.45(6) | 109.47(3) | 109.47(3) | 109.47(3) | 109.47(3) | 109.48(3) | 109.48(3) | 109.51(8) | 108.1(3) | 109.44(5) |
|  | 109.62(16) | 109.48(11) | 109.51(12) | 109.51(12) | 109.47(6) | 109.48(6) | 109.48(6) | 109.48(6) | 109.46(6) | 109.46(6) | 109.36(15) | 112.3(7) | 109.54(10) |
|  | 109.40(8) | 109.47(6) | 109.45(6) | 109.45(6) | 109.47(3) | 109.47(3) | 109.47(3) | 109.46(3) | 109.48(3) | 109.48(3) | 109.53(8) | 108.1(3) | 109.44(5) |
| Co1-N1-C1 | 128.6(3) | 128.04(19) | 128.12(19) | 128.07(19) | 128.13(11) | 128.13(11) | 128.17(11) | 128.12(11) | 128.19(11) | 128.24(11) | 127.8(3) | 127.3(11) | 128.44(18) |
| Co1-N1-C2 | 126.8(21) | 126.18(16) | 126.26(16) | 126.19(16) | 126.31(9) | 126.32(9) | 126.32(9) | 126.34(9) | 126.40(9) | 126.33(8) | 125.98(22) | 127.3(9) | 128.46(14) |
| N1-C1-C3 | 123.2(2) | 123.83(16) | 123.80(17) | 123.84(17) | 123.79(10) | 123.80(10) | 123.74(9) | 123.80(9) | 123.70(10) | 123.67(9) | 124.2(3) | 129.0(10) | 123.56(16) |
| N1-C1-N1 | 113.6(5) | 112.2(3) | 112.4(3) | 112.3(4) | 112.40(20) | 112.39(19) | 112.50(19) | 112.38(19) | 112.56(20) | 112.64(19) | 111.5(6) | 110.5(21) | 112.9(3) |
| N1-C2-C2 | 108.5(17) | 108.11(13) | 108.20(13) | 108.12(13) | 108.24(7) | 108.26(7) | 108.25(7) | 108.28(7) | 108.32(7) | 108.25(7) | 108.05(18) | 109.7(8) | 108.80(2) |
| C1-N1-C2 | 104.6(3) | 105.77(22) | 105.61(22) | 105.74(23) | 105.56(13) | 105.54(13) | 105.50(12) | 105.53(12) | 105.40(13) | 105.43(12) | 106.2(4) | 105.1(15) | 105.08(21) |
|  |  |  |  |  |  |  |  |  |  |  |  |  |  |

*a*The numbers in parentheses are the esds in the units of the least significant digit given for the corresponding parameter.

Table S4. Aperture size of the 6-ring of the ZIF-67 and Co/Zn-ZIF-67

| Crystal NO. | 1 *a* | 2 *a* | 3 *a* | 4 *a* | 5 *a* | 6 *a* | 7 *a* | 8 *a* | 9 *a* | 10 *a* | 11*b* | 12*b* | 13 *b* |
| --- | --- | --- | --- | --- | --- | --- | --- | --- | --- | --- | --- | --- | --- |
| Aperture Size (Å) | 5.824 | 5.840 | 5.846 | 5.848 | 5.851 | 5.853 | 5.852 | 5.851 | 5.855 | 5.906 | 5.795 | 5.787 | 5.768 |

*a*Co-ZIF-67, *b*Co/Zn-ZIF-67

**Table S5. Table of calculated structure factors squared, and observed structure factors squared with esds**

Crystal 1

| h | k | l | Fcal^2 | Fobs^2 | σ(Fobs^2) | |  | h | k | l | Fcal^2 | Fobs^2 | σ(Fobs^2) | |
| --- | --- | --- | --- | --- | --- | --- | --- | --- | --- | --- | --- | --- | --- | --- |
|  |  |  |  |  |  |  |  |  |  |  |  |  |  |  |
| 1 | 1 | 2 | 40738.1 | 948.71 | 217.72 |  |  | 3 | 4 | 7 | 2154.51 | 9.44 | 48.34 |  |
| 0 | 2 | 2 | 18480.92 | 148.76 | 102.97 |  |  | 0 | 5 | 7 | 3140.04 | 18.46 | 52.54 |  |
| 0 | 1 | 3 | 29967.36 | 600.77 | 129.51 |  |  | 2 | 5 | 7 | 1453.62 | 6.67 | 38.13 |  |
| 1 | 2 | 3 | 2850.31 | 12.69 | 52.34 |  |  | 4 | 5 | 7 | 4504.76 | 19.22 | 63 |  |
| 0 | 3 | 3 | 6890.52 | 60.32 | 86.53 |  |  | 1 | 6 | 7 | 2286.44 | 10.09 | 51.21 |  |
| 2 | 3 | 3 | 25931.6 | 159.64 | 138.62 |  |  | 3 | 6 | 7 | 5069.63 | 23.05 | 70.39 |  |
| 0 | 0 | 4 | 443.37 | 10.38 | 17.97 |  |  | 5 | 6 | 7 | 2084.69 | 9.9 | 49.61 |  |
| 1 | 1 | 4 | 11857.11 | 60.57 | 115.72 |  |  | 0 | 7 | 7 | 4206.32 | 54.8 | 67.75 |  |
| 0 | 2 | 4 | 1770.78 | 11.12 | 47.06 |  |  | 2 | 7 | 7 | 2862.18 | 16.69 | 50.71 |  |
| 2 | 2 | 4 | 12254.62 | 90.22 | 121.38 |  |  | 4 | 7 | 7 | 2845.6 | 17.41 | 53.18 |  |
| 1 | 3 | 4 | 21058.44 | 84.57 | 149.73 |  |  | 6 | 7 | 7 | 3452.51 | 21.72 | 56.68 |  |
| 3 | 3 | 4 | 26054.67 | 150.28 | 165.35 |  |  | 0 | 0 | 8 | 28278.34 | 313.7 | 184.11 |  |
| 0 | 4 | 4 | 92742.5 | 1558.28 | 272.5 |  |  | 1 | 1 | 8 | 1236.77 | 8.57 | 32.26 |  |
| 2 | 4 | 4 | 19640.58 | 130.41 | 150.08 |  |  | 0 | 2 | 8 | 861.9 | 6.44 | 33.04 |  |
| 4 | 4 | 4 | 96560.08 | 1311.49 | 287.46 |  |  | 2 | 2 | 8 | 6002.28 | 32.32 | 87.84 |  |
| 0 | 1 | 5 | 803.15 | 6.53 | 21.48 |  |  | 1 | 3 | 8 | 2614.76 | 11.15 | 56.76 |  |
| 1 | 2 | 5 | 1311 | 5.96 | 39.99 |  |  | 3 | 3 | 8 | 2044.71 | 12.36 | 48.99 |  |
| 0 | 3 | 5 | 3165.02 | 19.21 | 51.51 |  |  | 0 | 4 | 8 | 21490.84 | 118.95 | 150.99 |  |
| 2 | 3 | 5 | 12824.31 | 49.34 | 127.82 |  |  | 2 | 4 | 8 | 5294.6 | 20.78 | 72.18 |  |
| 1 | 4 | 5 | 5827.69 | 24.09 | 82.83 |  |  | 4 | 4 | 8 | 14067.54 | 86.22 | 124.9 |  |
| 3 | 4 | 5 | 3875.74 | 17 | 59.45 |  |  | 1 | 5 | 8 | 6311.26 | 26.55 | 80.02 |  |
| 0 | 5 | 5 | 4742.83 | 41.28 | 83.97 |  |  | 3 | 5 | 8 | 1342.92 | 5.98 | 36.86 |  |
| 2 | 5 | 5 | 164.82 | 1.83 | 13.77 |  |  | 5 | 5 | 8 | 1295.44 | 8.65 | 34.18 |  |
| 4 | 5 | 5 | 7871.57 | 47.73 | 98.04 |  |  | 0 | 6 | 8 | 5416.11 | 29.36 | 74.89 |  |
| 0 | 0 | 6 | 4861.33 | 56.2 | 55.01 |  |  | 2 | 6 | 8 | 737.06 | 3.79 | 28.87 |  |
| 1 | 1 | 6 | 4352.59 | 24.63 | 64.5 |  |  | 4 | 6 | 8 | 665.78 | 3.4 | 27.43 |  |
| 0 | 2 | 6 | 6719.51 | 36.33 | 80.7 |  |  | 6 | 6 | 8 | 1531.27 | 10.61 | 40.53 |  |
| 2 | 2 | 6 | 31653.98 | 174.11 | 178.79 |  |  | 1 | 7 | 8 | 2379.79 | 11.24 | 49.88 |  |
| 1 | 3 | 6 | 1156.66 | 5.45 | 43.1 |  |  | 3 | 7 | 8 | 3935.18 | 15.38 | 64.28 |  |
| 3 | 3 | 6 | 6304.04 | 35.57 | 81.65 |  |  | 5 | 7 | 8 | 2736.14 | 12.41 | 53.01 |  |
| 0 | 4 | 6 | 2258.41 | 13.72 | 52.54 |  |  | 7 | 7 | 8 | 2077.44 | 14.16 | 45.64 |  |
| 2 | 4 | 6 | 5177.52 | 20.95 | 75.71 |  |  | 0 | 8 | 8 | 21784 | 207.37 | 143.62 |  |
| 4 | 4 | 6 | 3828.06 | 23.77 | 62.02 |  |  | 2 | 8 | 8 | 3612.44 | 21.42 | 58.23 |  |
| 1 | 5 | 6 | 8151.56 | 32.15 | 92.27 |  |  | 4 | 8 | 8 | 13705.98 | 104.6 | 117.62 |  |
| 3 | 5 | 6 | 5613.22 | 22.56 | 76.17 |  |  | 6 | 8 | 8 | 2735.18 | 18.07 | 51.75 |  |
| 5 | 5 | 6 | 9123.62 | 55.11 | 97.71 |  |  | 8 | 8 | 8 | 5712.28 | 100.17 | 73.63 |  |
| 0 | 6 | 6 | 4932.33 | 43.49 | 66.51 |  |  | 0 | 1 | 9 | 5760.48 | 30.38 | 84.15 |  |
| 2 | 6 | 6 | 25315.89 | 142.29 | 166.11 |  |  | 1 | 2 | 9 | 5395.89 | 20.71 | 72.44 |  |
| 4 | 6 | 6 | 7194.24 | 42.54 | 86.48 |  |  | 0 | 3 | 9 | 1613.3 | 9.71 | 41.34 |  |
| 6 | 6 | 6 | 35001.24 | 428.78 | 185.94 |  |  | 2 | 3 | 9 | 1106.79 | 5.04 | 34.4 |  |
| 0 | 1 | 7 | 7294.02 | 39.38 | 72.27 |  |  | 1 | 4 | 9 | 1253.49 | 5.53 | 37.82 |  |
| 1 | 2 | 7 | 5096.36 | 19.82 | 75.94 |  |  | 3 | 4 | 9 | 3800.31 | 15.08 | 61.05 |  |
| 0 | 3 | 7 | 1037.61 | 7.02 | 34.26 |  |  | 0 | 5 | 9 | 828.05 | 5.71 | 32.47 |  |
| 2 | 3 | 7 | 3713.79 | 14.88 | 52.79 |  |  | 2 | 5 | 9 | 2722.51 | 11.48 | 56.15 |  |
| 1 | 4 | 7 | 4048.53 | 15.83 | 61.92 |  |  | 4 | 5 | 9 | 1358.41 | 6.11 | 39.65 |  |

| h | k | l | Fcal^2 | Fobs^2 | (Fobs^2) | |  | h | k | l | Fcal^2 | Fobs^2 | (Fobs^2) | |
| --- | --- | --- | --- | --- | --- | --- | --- | --- | --- | --- | --- | --- | --- | --- |
|  |  |  |  |  |  |  |  |  |  |  |  |  |  |  |
| 1 | 6 | 9 | 1748.16 | 7.22 | 39.54 |  |  | 4 | 10 | 10 | 787.1 | 6.36 | 29.25 |  |
| 3 | 6 | 9 | 1502.65 | 6.88 | 39.14 |  |  | 6 | 10 | 10 | 4327.37 | 38.73 | 65.11 |  |
| 5 | 6 | 9 | 549.25 | 4.04 | 23.63 |  |  | 8 | 10 | 10 | 333.41 | 4.39 | 18.44 |  |
| 0 | 7 | 9 | 3126.35 | 23.33 | 53.51 |  |  | 10 | 10 | 10 | 2141.02 | 44.59 | 42.89 |  |
| 2 | 7 | 9 | 3348.91 | 14.51 | 58.53 |  |  | 0 | 1 | 11 | 2853.09 | 15.6 | 53.46 |  |
| 4 | 7 | 9 | 638.83 | 3.5 | 26.32 |  |  | 1 | 2 | 11 | 2376.66 | 9.45 | 48.72 |  |
| 6 | 7 | 9 | 989.98 | 5.13 | 31.46 |  |  | 0 | 3 | 11 | 3254.66 | 17.8 | 57.43 |  |
| 1 | 8 | 9 | 1457.66 | 6.79 | 37.72 |  |  | 2 | 3 | 11 | 920.95 | 4.46 | 30.74 |  |
| 3 | 8 | 9 | 1391.24 | 6.74 | 37.35 |  |  | 1 | 4 | 11 | 195.53 | 1.81 | 13.22 |  |
| 5 | 8 | 9 | 1632.41 | 8.01 | 40.17 |  |  | 3 | 4 | 11 | 2248.75 | 10.97 | 48.33 |  |
| 7 | 8 | 9 | 626.17 | 4.06 | 25.1 |  |  | 0 | 5 | 11 | 1281.78 | 8 | 34.23 |  |
| 0 | 9 | 9 | 1970.98 | 17.31 | 44.49 |  |  | 2 | 5 | 11 | 2105.57 | 8.79 | 45.59 |  |
| 2 | 9 | 9 | 1616.76 | 12.89 | 41.27 |  |  | 4 | 5 | 11 | 1408.4 | 6.96 | 37.34 |  |
| 4 | 9 | 9 | 260.69 | 2.77 | 16.48 |  |  | 1 | 6 | 11 | 1481.42 | 6.98 | 39.1 |  |
| 6 | 9 | 9 | 1248.95 | 9.87 | 34.91 |  |  | 3 | 6 | 11 | 1600.55 | 6.78 | 38.43 |  |
| 8 | 9 | 9 | 373.26 | 4.39 | 19.38 |  |  | 5 | 6 | 11 | 452.34 | 3.38 | 21.68 |  |
| 0 | 0 | 10 | 27057.35 | 297.1 | 150.96 |  |  | 0 | 7 | 11 | 1215.5 | 8.96 | 36.46 |  |
| 1 | 1 | 10 | 736.47 | 5.68 | 24.42 |  |  | 2 | 7 | 11 | 855.48 | 4.12 | 27.9 |  |
| 0 | 2 | 10 | 662.26 | 4.89 | 27.58 |  |  | 4 | 7 | 11 | 1984.79 | 12.37 | 44.95 |  |
| 2 | 2 | 10 | 16420.07 | 84.57 | 129.88 |  |  | 6 | 7 | 11 | 85.33 | 1.89 | 10.81 |  |
| 1 | 3 | 10 | 2081.89 | 8.64 | 48.28 |  |  | 1 | 8 | 11 | 1283.53 | 6.07 | 35.22 |  |
| 3 | 3 | 10 | 6815.76 | 54.31 | 82.6 |  |  | 3 | 8 | 11 | 15.86 | 1.29 | 3.75 |  |
| 0 | 4 | 10 | 24.02 | 1.61 | 4.81 |  |  | 5 | 8 | 11 | 6.53 | 1.12 | 2.96 |  |
| 2 | 4 | 10 | 4015.28 | 15.12 | 61.06 |  |  | 7 | 8 | 11 | 104.41 | 2.62 | 10.11 |  |
| 4 | 4 | 10 | 3754.18 | 21.07 | 60.55 |  |  | 0 | 9 | 11 | 520.93 | 4.4 | 23.79 |  |
| 1 | 5 | 10 | 2168.39 | 8.68 | 45.79 |  |  | 2 | 9 | 11 | 473.22 | 3.41 | 20.92 |  |
| 3 | 5 | 10 | 1096.29 | 5.01 | 32.64 |  |  | 4 | 9 | 11 | 539.42 | 3.3 | 22.79 |  |
| 5 | 5 | 10 | 766.35 | 6.2 | 22.65 |  |  | 6 | 9 | 11 | 368.91 | 3.19 | 19.23 |  |
| 0 | 6 | 10 | 1319.28 | 7.99 | 38.42 |  |  | 8 | 9 | 11 | 641.45 | 5.08 | 24.27 |  |
| 2 | 6 | 10 | 15393.22 | 74.32 | 122.89 |  |  | 1 | 10 | 11 | 119.93 | 1.73 | 11.39 |  |
| 4 | 6 | 10 | 740.61 | 3.99 | 26.84 |  |  | 3 | 10 | 11 | 353.82 | 2.56 | 18.39 |  |
| 6 | 6 | 10 | 4142.15 | 28.55 | 64.24 |  |  | 5 | 10 | 11 | 250.05 | 9.86 | 16.37 |  |
| 1 | 7 | 10 | 1986.35 | 9.28 | 44.5 |  |  | 7 | 10 | 11 | 379.94 | 6.16 | 18.95 |  |
| 3 | 7 | 10 | 637.68 | 3.53 | 27.65 |  |  | 9 | 10 | 11 | 272.07 | 3.07 | 15.43 |  |
| 5 | 7 | 10 | 941.74 | 11.25 | 32.88 |  |  | 0 | 11 | 11 | 19.1 | 3 | 4.68 |  |
| 7 | 7 | 10 | 481.29 | 4.97 | 21.97 |  |  | 2 | 11 | 11 | 569.2 | 4.65 | 21.94 |  |
| 0 | 8 | 10 | 1557.01 | 9.71 | 40.26 |  |  | 4 | 11 | 11 | 35.33 | 1.79 | 6.26 |  |
| 2 | 8 | 10 | 1704.79 | 9.6 | 41.4 |  |  | 6 | 11 | 11 | 671.81 | 6.8 | 25.77 |  |
| 4 | 8 | 10 | 284.46 | 2.36 | 16.76 |  |  | 8 | 11 | 11 | 654.85 | 7.17 | 24.51 |  |
| 6 | 8 | 10 | 898.7 | 5.77 | 29.64 |  |  | 10 | 11 | 11 | 122.82 | 3.91 | 10.5 |  |
| 8 | 8 | 10 | 566.83 | 5.54 | 23.9 |  |  | 0 | 0 | 12 | 9759.9 | 114.77 | 105.78 |  |
| 1 | 9 | 10 | 920.67 | 4.64 | 29.36 |  |  | 1 | 1 | 12 | 1343.02 | 8.23 | 36.43 |  |
| 3 | 9 | 10 | 630.26 | 4.25 | 25.44 |  |  | 0 | 2 | 12 | 2134.6 | 12.32 | 46.13 |  |
| 5 | 9 | 10 | 868.83 | 4.9 | 27.97 |  |  | 2 | 2 | 12 | 1411.29 | 8.51 | 38.06 |  |
| 7 | 9 | 10 | 365.45 | 3.14 | 19.85 |  |  | 1 | 3 | 12 | 942.13 | 4.33 | 32.25 |  |
| 9 | 9 | 10 | 340.78 | 4.89 | 16.88 |  |  | 3 | 3 | 12 | 773.87 | 5.35 | 27.79 |  |
| 0 | 10 | 10 | 201.38 | 4.15 | 14.41 |  |  | 0 | 4 | 12 | 8834.33 | 81.96 | 93.29 |  |
| 2 | 10 | 10 | 4165.56 | 45.57 | 64.22 |  |  | 2 | 4 | 12 | 556.41 | 2.93 | 21.96 |  |

| h | k | l | Fcal^2 | Fobs^2 | (Fobs^2) | |  | h | k | l | Fcal^2 | Fobs^2 | (Fobs^2) | |
| --- | --- | --- | --- | --- | --- | --- | --- | --- | --- | --- | --- | --- | --- | --- |
|  |  |  |  |  |  |  |  |  |  |  |  |  |  |  |
| 4 | 4 | 12 | 11214.44 | 74.25 | 105.12 |  |  | 2 | 5 | 13 | 2533.54 | 16.57 | 49.92 |  |
| 1 | 5 | 12 | 1649.14 | 7.47 | 39.93 |  |  | 4 | 5 | 13 | 796.1 | 4.09 | 27.02 |  |
| 3 | 5 | 12 | 1313.91 | 7.22 | 36.55 |  |  | 1 | 6 | 13 | 694.8 | 3.69 | 25.48 |  |
| 5 | 5 | 12 | 1279.95 | 9.45 | 33.39 |  |  | 3 | 6 | 13 | 305.03 | 2.25 | 17.27 |  |
| 0 | 6 | 12 | 218.43 | 2.69 | 14.85 |  |  | 5 | 6 | 13 | 23.37 | 1.42 | 4.6 |  |
| 2 | 6 | 12 | 1658.99 | 7.09 | 40.66 |  |  | 0 | 7 | 13 | 583.99 | 4.81 | 24.31 |  |
| 4 | 6 | 12 | 2111.79 | 18.93 | 46.42 |  |  | 2 | 7 | 13 | 866.31 | 5.78 | 29.69 |  |
| 6 | 6 | 12 | 22.37 | 1.54 | 5.27 |  |  | 4 | 7 | 13 | 322.36 | 2.64 | 18.1 |  |
| 1 | 7 | 12 | 93.43 | 1.63 | 9.93 |  |  | 6 | 7 | 13 | 274.56 | 2.76 | 16.87 |  |
| 3 | 7 | 12 | 790.04 | 4.18 | 27.67 |  |  | 1 | 8 | 13 | 680.91 | 3.77 | 26.09 |  |
| 5 | 7 | 12 | 411.46 | 3.61 | 21.25 |  |  | 3 | 8 | 13 | 29.64 | 1.48 | 5.04 |  |
| 7 | 7 | 12 | 375.59 | 4.32 | 18.67 |  |  | 5 | 8 | 13 | 8.47 | 1.21 | 2.99 |  |
| 0 | 8 | 12 | 4118.17 | 31.21 | 62.3 |  |  | 7 | 8 | 13 | 391.71 | 4.57 | 18.87 |  |
| 2 | 8 | 12 | 332.69 | 2.39 | 18.46 |  |  | 0 | 9 | 13 | 553.08 | 4.56 | 21.99 |  |
| 4 | 8 | 12 | 2380.9 | 20.63 | 47.12 |  |  | 2 | 9 | 13 | 48.98 | 1.49 | 6.54 |  |
| 6 | 8 | 12 | 50.62 | 1.7 | 6.78 |  |  | 4 | 9 | 13 | 373.34 | 2.78 | 19.03 |  |
| 8 | 8 | 12 | 2572.64 | 22.27 | 49.39 |  |  | 6 | 9 | 13 | 563.01 | 4.59 | 23.34 |  |
| 1 | 9 | 12 | 203.55 | 1.97 | 14.58 |  |  | 8 | 9 | 13 | 261.38 | 2.94 | 15.97 |  |
| 3 | 9 | 12 | 759.33 | 5.23 | 27.08 |  |  | 1 | 10 | 13 | 273.11 | 2.36 | 15.9 |  |
| 5 | 9 | 12 | 390.98 | 2.93 | 19.37 |  |  | 3 | 10 | 13 | 525.23 | 3.63 | 22.14 |  |
| 7 | 9 | 12 | 416.2 | 3.42 | 20.23 |  |  | 5 | 10 | 13 | 327.22 | 3.22 | 18.42 |  |
| 9 | 9 | 12 | 250.16 | 4.48 | 15.36 |  |  | 7 | 10 | 13 | 88.38 | 2.32 | 8.63 |  |
| 0 | 10 | 12 | 101.88 | 2.45 | 10.38 |  |  | 9 | 10 | 13 | 57.64 | 2.31 | 7.45 |  |
| 2 | 10 | 12 | 63.14 | 1.55 | 8.61 |  |  | 0 | 11 | 13 | 2.12 | 2.2 | 0.94 |  |
| 4 | 10 | 12 | 423.4 | 3.62 | 20.92 |  |  | 2 | 11 | 13 | 206.72 | 2.79 | 13.84 |  |
| 6 | 10 | 12 | 515.57 | 4.23 | 22.04 |  |  | 4 | 11 | 13 | 445.37 | 4.07 | 20.67 |  |
| 8 | 10 | 12 | 365.85 | 3.75 | 17.94 |  |  | 6 | 11 | 13 | 233.41 | 3 | 14.4 |  |
| 10 | 10 | 12 | 265.03 | 4.89 | 15.24 |  |  | 8 | 11 | 13 | 34.67 | 2.15 | 5.43 |  |
| 1 | 11 | 12 | 593 | 4.74 | 23.64 |  |  | 10 | 11 | 13 | 105.46 | 3.03 | 9.87 |  |
| 3 | 11 | 12 | 659.97 | 3.97 | 25.51 |  |  | 1 | 12 | 13 | 175.92 | 2.19 | 12.62 |  |
| 5 | 11 | 12 | 393.71 | 3.73 | 19.02 |  |  | 3 | 12 | 13 | 184.15 | 2.62 | 13.54 |  |
| 7 | 11 | 12 | 148.38 | 2.57 | 12.2 |  |  | 5 | 12 | 13 | 149.24 | 2.74 | 12.69 |  |
| 9 | 11 | 12 | 72.35 | 2.53 | 8.17 |  |  | 7 | 12 | 13 | 187.99 | 3.15 | 13.29 |  |
| 11 | 11 | 12 | 77.42 | 4.1 | 8.23 |  |  | 9 | 12 | 13 | 115.95 | 3.02 | 10.52 |  |
| 0 | 12 | 12 | 1547.84 | 22.61 | 36.8 |  |  | 11 | 12 | 13 | 55.87 | 2.9 | 7.5 |  |
| 2 | 12 | 12 | 670.12 | 7.2 | 25.28 |  |  | 0 | 13 | 13 | 120.05 | 4.61 | 10.46 |  |
| 4 | 12 | 12 | 2615.05 | 35.08 | 49.73 |  |  | 2 | 13 | 13 | 61.82 | 2.66 | 8.36 |  |
| 6 | 12 | 12 | 97.97 | 3.48 | 10.07 |  |  | 4 | 13 | 13 | 77.28 | 2.43 | 8.94 |  |
| 8 | 12 | 12 | 926.59 | 12.25 | 29.12 |  |  | 6 | 13 | 13 | 216.44 | 4.63 | 14.14 |  |
| 10 | 12 | 12 | 84.9 | 3.34 | 8.64 |  |  | 8 | 13 | 13 | 33.2 | 3.18 | 5.58 |  |
| 12 | 12 | 12 | 528.3 | 16.65 | 22.49 |  |  | 10 | 13 | 13 | 54.96 | 4.43 | 6.95 |  |
| 0 | 1 | 13 | 490.26 | 3.75 | 21.69 |  |  | 12 | 13 | 13 | 39.18 | 4.39 | 5.73 |  |
| 1 | 2 | 13 | 342.57 | 2.25 | 18.95 |  |  | 0 | 0 | 14 | 350.85 | 6.92 | 20.96 |  |
| 0 | 3 | 13 | 547.08 | 4.24 | 25.6 |  |  | 1 | 1 | 14 | 1867.47 | 11.17 | 40.6 |  |
| 2 | 3 | 13 | 1130.13 | 4.99 | 33.45 |  |  | 0 | 2 | 14 | 994.63 | 7.61 | 30.61 |  |
| 1 | 4 | 13 | 1548.26 | 6.72 | 39.33 |  |  | 2 | 2 | 14 | 5775.06 | 47.31 | 75.14 |  |
| 3 | 4 | 13 | 1048.57 | 5.3 | 31.77 |  |  | 1 | 3 | 14 | 1062.04 | 5.89 | 33.7 |  |
| 0 | 5 | 13 | 34.62 | 2.12 | 5.79 |  |  | 3 | 3 | 14 | 181.39 | 2.61 | 14.08 |  |

| h | k | l | Fcal^2 | Fobs^2 | (Fobs^2) | |  | h | k | l | Fcal^2 | Fobs^2 | (Fobs^2) | |
| --- | --- | --- | --- | --- | --- | --- | --- | --- | --- | --- | --- | --- | --- | --- |
|  |  |  |  |  |  |  |  |  |  |  |  |  |  |  |
| 0 | 4 | 14 | 1167.45 | 8.07 | 34.21 |  |  | 11 | 13 | 14 | 17.74 | 3.52 | 4.24 |  |
| 2 | 4 | 14 | 590.3 | 3.22 | 24.09 |  |  | 13 | 13 | 14 | 13.64 | 5.77 | 3.48 |  |
| 4 | 4 | 14 | 684.76 | 5.42 | 24.97 |  |  | 2 | 14 | 14 | 391.74 | 5.3 | 19.86 |  |
| 1 | 5 | 14 | 43.76 | 1.79 | 6.7 |  |  | 4 | 14 | 14 | 139.93 | 3.48 | 12.01 |  |
| 3 | 5 | 14 | 254.92 | 2.77 | 16.72 |  |  | 6 | 14 | 14 | 565.39 | 8.64 | 22.67 |  |
| 5 | 5 | 14 | 1689.56 | 12.23 | 39.96 |  |  | 8 | 14 | 14 | 14.39 | 3.18 | 4.01 |  |
| 0 | 6 | 14 | 315.99 | 3.34 | 18.09 |  |  | 10 | 14 | 14 | 140.01 | 4.23 | 12.18 |  |
| 2 | 6 | 14 | 3586.34 | 20.75 | 58.02 |  |  | 14 | 14 | 14 | 42.47 | 16.14 | 7.6 |  |
| 4 | 6 | 14 | 171.92 | 1.84 | 12.67 |  |  | 0 | 1 | 15 | 79.49 | 2.2 | 10.24 |  |
| 6 | 6 | 14 | 1699.14 | 15.13 | 40.79 |  |  | 1 | 2 | 15 | 298.19 | 2.33 | 17.73 |  |
| 1 | 7 | 14 | 421.7 | 3.31 | 21.02 |  |  | 0 | 3 | 15 | 1073.19 | 8.24 | 31.57 |  |
| 3 | 7 | 14 | 109.07 | 1.64 | 10.65 |  |  | 2 | 3 | 15 | 323.03 | 2.53 | 18.24 |  |
| 5 | 7 | 14 | 149.1 | 1.81 | 11.55 |  |  | 1 | 4 | 15 | 363.97 | 2.59 | 18.42 |  |
| 7 | 7 | 14 | 491.22 | 6.1 | 21.73 |  |  | 3 | 4 | 15 | 59.38 | 1.61 | 7.63 |  |
| 0 | 8 | 14 | 443.14 | 4.07 | 20.74 |  |  | 0 | 5 | 15 | 127.53 | 2.52 | 11.56 |  |
| 2 | 8 | 14 | 431.79 | 2.81 | 20.15 |  |  | 2 | 5 | 15 | 269.31 | 2.34 | 16.92 |  |
| 4 | 8 | 14 | 108.49 | 1.85 | 10.6 |  |  | 4 | 5 | 15 | 761.3 | 4.52 | 27.56 |  |
| 6 | 8 | 14 | 285.05 | 3.19 | 15.98 |  |  | 1 | 6 | 15 | 394.04 | 3.15 | 19.36 |  |
| 8 | 8 | 14 | 211.61 | 4.16 | 13.74 |  |  | 3 | 6 | 15 | 535.71 | 4.71 | 23.09 |  |
| 1 | 9 | 14 | 756.55 | 4.15 | 26.32 |  |  | 5 | 6 | 15 | 61.9 | 1.67 | 8.27 |  |
| 3 | 9 | 14 | 196.24 | 2.03 | 13.58 |  |  | 0 | 7 | 15 | 380.05 | 3.9 | 19.16 |  |
| 5 | 9 | 14 | 35.99 | 1.8 | 6.6 |  |  | 2 | 7 | 15 | 286.49 | 2.39 | 16.33 |  |
| 7 | 9 | 14 | 247.72 | 3.9 | 14.85 |  |  | 4 | 7 | 15 | 164.01 | 2.07 | 12.28 |  |
| 9 | 9 | 14 | 280.17 | 4.81 | 15.81 |  |  | 6 | 7 | 15 | 258.06 | 2.42 | 16.01 |  |
| 0 | 10 | 14 | 507.17 | 10.5 | 22.2 |  |  | 1 | 8 | 15 | 444.73 | 3.9 | 20.13 |  |
| 2 | 10 | 14 | 1883.8 | 19.93 | 41.29 |  |  | 3 | 8 | 15 | 342.71 | 2.81 | 19.04 |  |
| 4 | 10 | 14 | 94.63 | 1.78 | 10.11 |  |  | 5 | 8 | 15 | 206.83 | 3.95 | 13.96 |  |
| 6 | 10 | 14 | 1301.5 | 10.79 | 34.75 |  |  | 7 | 8 | 15 | 220.51 | 3.36 | 14.41 |  |
| 8 | 10 | 14 | 138.96 | 2.73 | 11.47 |  |  | 0 | 9 | 15 | 461.33 | 5.31 | 19.74 |  |
| 10 | 10 | 14 | 475.9 | 7.39 | 20.98 |  |  | 2 | 9 | 15 | 207.46 | 3.08 | 13.59 |  |
| 1 | 11 | 14 | 72.91 | 1.76 | 8.1 |  |  | 4 | 9 | 15 | 11.54 | 1.47 | 3.81 |  |
| 3 | 11 | 14 | 311.45 | 3.35 | 18.29 |  |  | 6 | 9 | 15 | 217.95 | 3.66 | 14.75 |  |
| 5 | 11 | 14 | 239.27 | 4.49 | 15.46 |  |  | 8 | 9 | 15 | 127.63 | 3.13 | 10.74 |  |
| 7 | 11 | 14 | 97.56 | 2.57 | 9.67 |  |  | 1 | 10 | 15 | 360.11 | 3.19 | 18.49 |  |
| 9 | 11 | 14 | 23.3 | 2.13 | 4.78 |  |  | 3 | 10 | 15 | 25.03 | 1.63 | 4.7 |  |
| 11 | 11 | 14 | 11.63 | 3.34 | 3 |  |  | 5 | 10 | 15 | 102.21 | 2.36 | 10.51 |  |
| 0 | 12 | 14 | 53.52 | 3.81 | 6.86 |  |  | 7 | 10 | 15 | 79.53 | 2.61 | 8.63 |  |
| 2 | 12 | 14 | 144.32 | 2.54 | 11.45 |  |  | 9 | 10 | 15 | 33.72 | 2.91 | 5.89 |  |
| 4 | 12 | 14 | 92.14 | 1.72 | 9.86 |  |  | 0 | 11 | 15 | 76.2 | 3.46 | 8.37 |  |
| 6 | 12 | 14 | 105.28 | 2.75 | 10.25 |  |  | 2 | 11 | 15 | 104.19 | 2.02 | 9.72 |  |
| 8 | 12 | 14 | 55.98 | 2.48 | 7.23 |  |  | 4 | 11 | 15 | 243.78 | 4.63 | 15.79 |  |
| 10 | 12 | 14 | 15.9 | 2.41 | 4.41 |  |  | 6 | 11 | 15 | 18.03 | 2.02 | 3.98 |  |
| 12 | 12 | 14 | 44.59 | 4.88 | 6.83 |  |  | 8 | 11 | 15 | 17.32 | 2.21 | 4.42 |  |
| 1 | 13 | 14 | 92.06 | 2.02 | 9.32 |  |  | 10 | 11 | 15 | 51.6 | 2.71 | 7.19 |  |
| 3 | 13 | 14 | 91.58 | 2.28 | 9.61 |  |  | 1 | 12 | 15 | 7.88 | 1.63 | 2.8 |  |
| 5 | 13 | 14 | 74.03 | 2.97 | 8.19 |  |  | 3 | 12 | 15 | 113.37 | 2.05 | 10.29 |  |
| 7 | 13 | 14 | 44.11 | 2.53 | 6.42 |  |  | 5 | 12 | 15 | 52.2 | 4 | 7.69 |  |
| 9 | 13 | 14 | 29.31 | 2.41 | 5 |  |  | 7 | 12 | 15 | 26.05 | 2.21 | 4.93 |  |

| h | k | l | Fcal^2 | Fobs^2 | (Fobs^2) | |  | h | k | l | Fcal^2 | Fobs^2 | (Fobs^2) | |
| --- | --- | --- | --- | --- | --- | --- | --- | --- | --- | --- | --- | --- | --- | --- |
|  |  |  |  |  |  |  |  |  |  |  |  |  |  |  |
| 9 | 12 | 15 | 21.49 | 2.31 | 4.39 |  |  | 5 | 9 | 16 | 264.66 | 3.6 | 16.14 |  |
| 11 | 12 | 15 | 13.9 | 2.3 | 3.75 |  |  | 7 | 9 | 16 | 184.56 | 3.76 | 13.42 |  |
| 0 | 13 | 15 | 116.72 | 3.18 | 10.62 |  |  | 9 | 9 | 16 | 51.37 | 3.41 | 6.95 |  |
| 2 | 13 | 15 | 42.48 | 2.02 | 6.4 |  |  | 0 | 10 | 16 | 79.39 | 5.42 | 8.79 |  |
| 4 | 13 | 15 | 22.04 | 1.49 | 5.31 |  |  | 2 | 10 | 16 | 140.99 | 2.13 | 11.41 |  |
| 6 | 13 | 15 | 68.3 | 2.71 | 7.67 |  |  | 4 | 10 | 16 | 102.45 | 2.49 | 10.02 |  |
| 8 | 13 | 15 | 51 | 2.92 | 7.36 |  |  | 6 | 10 | 16 | 4.43 | 2.94 | 1.51 |  |
| 10 | 13 | 15 | 9.42 | 2.46 | 3.03 |  |  | 8 | 10 | 16 | 84.02 | 2.52 | 8.98 |  |
| 12 | 13 | 15 | 13.62 | 2.87 | 4.19 |  |  | 10 | 10 | 16 | 55.54 | 3.74 | 7.76 |  |
| 1 | 14 | 15 | 14.66 | 1.88 | 3.73 |  |  | 1 | 11 | 16 | 148.03 | 2.59 | 11.47 |  |
| 3 | 14 | 15 | 31.17 | 1.8 | 6.05 |  |  | 5 | 11 | 16 | 42.82 | 5.76 | 6.7 |  |
| 5 | 14 | 15 | 72.26 | 2.59 | 8.42 |  |  | 7 | 11 | 16 | 84.26 | 2.75 | 8.92 |  |
| 7 | 14 | 15 | 44.61 | 2.41 | 6.69 |  |  | 9 | 11 | 16 | 23.97 | 2.58 | 5.02 |  |
| 9 | 14 | 15 | 15.56 | 3.15 | 4.21 |  |  | 11 | 11 | 16 | 18.77 | 5.3 | 3.22 |  |
| 11 | 14 | 15 | 7.93 | 3.71 | 2.76 |  |  | 0 | 12 | 16 | 247.14 | 6.92 | 15.56 |  |
| 0 | 15 | 15 | 20.04 | 3.92 | 4.61 |  |  | 2 | 12 | 16 | 14.86 | 1.72 | 3.74 |  |
| 2 | 15 | 15 | 40.05 | 2.69 | 6.26 |  |  | 4 | 12 | 16 | 549.68 | 7.86 | 22.57 |  |
| 4 | 15 | 15 | 17.59 | 2.45 | 4.31 |  |  | 6 | 12 | 16 | 105.35 | 3.12 | 10 |  |
| 6 | 15 | 15 | 25.9 | 3.34 | 4.89 |  |  | 8 | 12 | 16 | 218.75 | 4.21 | 14.47 |  |
| 8 | 15 | 15 | 21.99 | 3.74 | 5.46 |  |  | 12 | 12 | 16 | 37.69 | 5.04 | 6.59 |  |
| 10 | 15 | 15 | 19.47 | 4.1 | 4.55 |  |  | 1 | 13 | 16 | 11.73 | 1.75 | 4.21 |  |
| 0 | 0 | 16 | 2480.94 | 34.4 | 51.64 |  |  | 3 | 13 | 16 | 28.01 | 1.87 | 5.62 |  |
| 1 | 1 | 16 | 1100.94 | 8.88 | 33.03 |  |  | 5 | 13 | 16 | 107.15 | 2.71 | 10.12 |  |
| 0 | 2 | 16 | 584.36 | 6.23 | 24.04 |  |  | 7 | 13 | 16 | 41.82 | 3.53 | 6.43 |  |
| 2 | 2 | 16 | 130.11 | 2.66 | 11.8 |  |  | 0 | 14 | 16 | 46.74 | 2.94 | 7.23 |  |
| 1 | 3 | 16 | 168.06 | 2.32 | 13.26 |  |  | 2 | 14 | 16 | 16.62 | 2.13 | 4.31 |  |
| 3 | 3 | 16 | 464.61 | 4.57 | 21.74 |  |  | 4 | 14 | 16 | 24.18 | 1.87 | 5.56 |  |
| 0 | 4 | 16 | 1816.12 | 23.08 | 43.43 |  |  | 6 | 14 | 16 | 26.75 | 2.45 | 5.12 |  |
| 2 | 4 | 16 | 163.8 | 1.96 | 12.71 |  |  | 8 | 14 | 16 | 13.33 | 2.73 | 3.56 |  |
| 4 | 4 | 16 | 1468.94 | 15.83 | 37.28 |  |  | 10 | 14 | 16 | 10.43 | 2.91 | 3.36 |  |
| 1 | 5 | 16 | 183.64 | 2.35 | 13.35 |  |  | 1 | 15 | 16 | 22.34 | 2.02 | 4.78 |  |
| 3 | 5 | 16 | 135.47 | 1.96 | 11.69 |  |  | 3 | 15 | 16 | 18.78 | 1.91 | 4.7 |  |
| 5 | 5 | 16 | 109.36 | 2.77 | 10.43 |  |  | 5 | 15 | 16 | 22.3 | 2.52 | 4.86 |  |
| 0 | 6 | 16 | 219.17 | 3.26 | 15.16 |  |  | 7 | 15 | 16 | 17.84 | 2.95 | 4.2 |  |
| 2 | 6 | 16 | 276.14 | 2.47 | 16.79 |  |  | 9 | 15 | 16 | 14.14 | 3.22 | 3.89 |  |
| 4 | 6 | 16 | 22.66 | 1.7 | 4.73 |  |  | 0 | 16 | 16 | 171.34 | 6.69 | 14.47 |  |
| 6 | 6 | 16 | 318.43 | 4.57 | 17.52 |  |  | 4 | 16 | 16 | 59.99 | 3.58 | 8.87 |  |
| 1 | 7 | 16 | 254.75 | 2.82 | 15.86 |  |  | 6 | 16 | 16 | 13.39 | 3.74 | 4.51 |  |
| 3 | 7 | 16 | 217.5 | 2.28 | 14.06 |  |  | 8 | 16 | 16 | 99.56 | 7.85 | 9.58 |  |
| 5 | 7 | 16 | 67.26 | 1.93 | 7.85 |  |  | 10 | 16 | 16 | 28.73 | 7.16 | 4.9 |  |
| 7 | 7 | 16 | 75.77 | 2.52 | 9.13 |  |  | 0 | 1 | 17 | 92.63 | 2.69 | 8.07 |  |
| 0 | 8 | 16 | 3091.96 | 31.39 | 52.39 |  |  | 1 | 2 | 17 | 248.34 | 2.98 | 16.01 |  |
| 2 | 8 | 16 | 332.57 | 2.84 | 17.92 |  |  | 0 | 3 | 17 | 221.15 | 3.43 | 16.36 |  |
| 4 | 8 | 16 | 711.18 | 8.24 | 26.11 |  |  | 2 | 3 | 17 | 77.25 | 1.81 | 9.15 |  |
| 6 | 8 | 16 | 106.79 | 2.66 | 10.62 |  |  | 1 | 4 | 17 | 46.97 | 1.76 | 7.16 |  |
| 8 | 8 | 16 | 1047.03 | 14.78 | 30.62 |  |  | 3 | 4 | 17 | 60.44 | 1.7 | 7.27 |  |
| 1 | 9 | 16 | 291.82 | 3.14 | 16.4 |  |  | 0 | 5 | 17 | 462.34 | 4.96 | 20.76 |  |
| 3 | 9 | 16 | 102.95 | 1.89 | 10.06 |  |  | 2 | 5 | 17 | 82.91 | 1.87 | 9.01 |  |

| h | k | l | Fcal^2 | Fobs^2 | (Fobs^2) | |  | h | k | l | Fcal^2 | Fobs^2 | (Fobs^2) | |
| --- | --- | --- | --- | --- | --- | --- | --- | --- | --- | --- | --- | --- | --- | --- |
|  |  |  |  |  |  |  |  |  |  |  |  |  |  |  |
| 4 | 5 | 17 | 252.52 | 2.42 | 15.11 |  |  | 2 | 17 | 17 | 30.55 | 9.23 | 5.01 |  |
| 1 | 6 | 17 | 275.94 | 2.59 | 16.7 |  |  | 0 | 0 | 18 | 12.81 | 4.38 | 1.97 |  |
| 3 | 6 | 17 | 346.92 | 6.25 | 17.87 |  |  | 1 | 1 | 18 | 327.18 | 4.32 | 18.29 |  |
| 5 | 6 | 17 | 70.92 | 1.81 | 8.69 |  |  | 0 | 2 | 18 | 179.82 | 3.1 | 14.08 |  |
| 0 | 7 | 17 | 323.67 | 3.83 | 17.61 |  |  | 2 | 2 | 18 | 850.06 | 7.9 | 28.74 |  |
| 2 | 7 | 17 | 135.19 | 2.08 | 11.3 |  |  | 1 | 3 | 18 | 136.06 | 2.02 | 11.07 |  |
| 4 | 7 | 17 | 21.65 | 1.72 | 4.59 |  |  | 3 | 3 | 18 | 166.17 | 3.01 | 13.26 |  |
| 6 | 7 | 17 | 106.3 | 2.33 | 9.99 |  |  | 0 | 4 | 18 | 139.37 | 2.94 | 11.22 |  |
| 1 | 8 | 17 | 240.78 | 2.59 | 15.41 |  |  | 2 | 4 | 18 | 135.18 | 2.1 | 11.29 |  |
| 3 | 8 | 17 | 184.54 | 2.53 | 12.77 |  |  | 4 | 4 | 18 | 149.38 | 3.1 | 11.71 |  |
| 5 | 8 | 17 | 106.54 | 2.58 | 10.51 |  |  | 1 | 5 | 18 | 133.68 | 2.07 | 11.56 |  |
| 7 | 8 | 17 | 41.32 | 1.92 | 7.41 |  |  | 3 | 5 | 18 | 133.18 | 2.33 | 10.45 |  |
| 0 | 9 | 17 | 98.08 | 2.77 | 9.19 |  |  | 5 | 5 | 18 | 157.63 | 3.32 | 11.86 |  |
| 2 | 9 | 17 | 148.89 | 2.53 | 11.89 |  |  | 0 | 6 | 18 | 27.42 | 2.45 | 5.72 |  |
| 4 | 9 | 17 | 24.28 | 1.83 | 4.73 |  |  | 2 | 6 | 18 | 970.19 | 14.85 | 29.98 |  |
| 6 | 9 | 17 | 60.64 | 2.27 | 8.43 |  |  | 4 | 6 | 18 | 144.51 | 2.65 | 11.29 |  |
| 8 | 9 | 17 | 52.31 | 3.19 | 6.79 |  |  | 6 | 6 | 18 | 460.23 | 5.55 | 20.65 |  |
| 1 | 10 | 17 | 143.8 | 2.46 | 11.74 |  |  | 1 | 7 | 18 | 129.45 | 2.79 | 11.08 |  |
| 3 | 10 | 17 | 8.41 | 1.75 | 2.54 |  |  | 3 | 7 | 18 | 20.45 | 1.76 | 5.06 |  |
| 5 | 10 | 17 | 23.19 | 1.55 | 5.4 |  |  | 5 | 7 | 18 | 57.26 | 2.34 | 7.63 |  |
| 7 | 10 | 17 | 38.66 | 2.53 | 6.16 |  |  | 7 | 7 | 18 | 56.56 | 2.45 | 8.16 |  |
| 9 | 10 | 17 | 25.74 | 2.85 | 5.21 |  |  | 0 | 8 | 18 | 213.94 | 3.59 | 13.98 |  |
| 0 | 11 | 17 | 18.28 | 4.15 | 4.36 |  |  | 2 | 8 | 18 | 65.62 | 2.24 | 7.49 |  |
| 2 | 11 | 17 | 52.16 | 1.98 | 6.65 |  |  | 4 | 8 | 18 | 38.97 | 1.78 | 6.19 |  |
| 4 | 11 | 17 | 78.38 | 1.96 | 9.11 |  |  | 6 | 8 | 18 | 43.49 | 1.7 | 6.93 |  |
| 6 | 11 | 17 | 8.27 | 2.38 | 2.56 |  |  | 8 | 8 | 18 | 16.24 | 3.21 | 4.34 |  |
| 8 | 11 | 17 | 46.84 | 2.55 | 6.85 |  |  | 1 | 9 | 18 | 62.88 | 2 | 7.51 |  |
| 10 | 11 | 17 | 36.37 | 2.54 | 5.92 |  |  | 3 | 9 | 18 | 41.99 | 1.93 | 6.06 |  |
| 1 | 12 | 17 | 10.31 | 1.86 | 3.51 |  |  | 5 | 9 | 18 | 32 | 1.8 | 5.82 |  |
| 3 | 12 | 17 | 74.06 | 2.02 | 9.14 |  |  | 7 | 9 | 18 | 28.56 | 2.29 | 5.52 |  |
| 5 | 12 | 17 | 11.86 | 2.57 | 4.27 |  |  | 9 | 9 | 18 | 25.68 | 3.83 | 4.7 |  |
| 7 | 12 | 17 | 9.04 | 2.41 | 3.04 |  |  | 0 | 10 | 18 | 128.56 | 4.27 | 11.09 |  |
| 9 | 12 | 17 | 12.33 | 2.52 | 3.16 |  |  | 2 | 10 | 18 | 391.26 | 4.61 | 19.41 |  |
| 0 | 13 | 17 | 17.65 | 2.59 | 3.99 |  |  | 4 | 10 | 18 | 33.42 | 1.87 | 5.75 |  |
| 2 | 13 | 17 | 33.71 | 1.98 | 6.15 |  |  | 6 | 10 | 18 | 243.51 | 3.59 | 15.32 |  |
| 4 | 13 | 17 | 25.62 | 1.88 | 5.47 |  |  | 8 | 10 | 18 | 10.54 | 2.59 | 3.34 |  |
| 6 | 13 | 17 | 14.39 | 2.3 | 3.66 |  |  | 10 | 10 | 18 | 147.77 | 5.61 | 12.56 |  |
| 8 | 13 | 17 | 20.23 | 2.55 | 4.54 |  |  | 1 | 11 | 18 | 22.72 | 1.92 | 5.12 |  |
| 3 | 14 | 17 | 6.83 | 2.76 | 2.36 |  |  | 3 | 11 | 18 | 84.94 | 2.24 | 9.56 |  |
| 5 | 14 | 17 | 42.01 | 3.18 | 6.5 |  |  | 5 | 11 | 18 | 31.59 | 1.91 | 6.3 |  |
| 7 | 14 | 17 | 32.06 | 2.89 | 5.76 |  |  | 7 | 11 | 18 | 45.63 | 2.88 | 6.81 |  |
| 9 | 14 | 17 | 12.98 | 3.9 | 3.46 |  |  | 9 | 11 | 18 | 15.05 | 2.78 | 3.68 |  |
| 0 | 15 | 17 | 27.52 | 2.85 | 5.5 |  |  | 2 | 12 | 18 | 30.92 | 2.09 | 5.66 |  |
| 2 | 15 | 17 | 25.95 | 2.28 | 5.63 |  |  | 4 | 12 | 18 | 18.48 | 1.83 | 4.94 |  |
| 6 | 15 | 17 | 7.11 | 3.59 | 2.98 |  |  | 6 | 12 | 18 | 17.32 | 2.68 | 4.53 |  |
| 1 | 16 | 17 | 9.92 | 2.66 | 3.9 |  |  | 8 | 12 | 18 | 19.95 | 2.44 | 4.47 |  |
| 3 | 16 | 17 | 7.87 | 3.6 | 2.5 |  |  | 10 | 12 | 18 | 13.29 | 4.03 | 3.65 |  |
| 0 | 17 | 17 | 18.86 | 5.54 | 5.75 |  |  | 1 | 13 | 18 | 6.35 | 1.9 | 2.61 |  |

| h | k | l | Fcal^2 | Fobs^2 | (Fobs^2) | |  | h | k | l | Fcal^2 | Fobs^2 | (Fobs^2) | |
| --- | --- | --- | --- | --- | --- | --- | --- | --- | --- | --- | --- | --- | --- | --- |
|  |  |  |  |  |  |  |  |  |  |  |  |  |  |  |
| 3 | 13 | 18 | 48.92 | 2.07 | 7.42 |  |  | 2 | 13 | 19 | 10.9 | 2.18 | 3.39 |  |
| 5 | 13 | 18 | 13.47 | 2.78 | 3.34 |  |  | 4 | 13 | 19 | 15.77 | 2.99 | 4.11 |  |
| 2 | 14 | 18 | 102.71 | 3.46 | 11.2 |  |  | 6 | 13 | 19 | 13.64 | 3.2 | 3.96 |  |
| 4 | 14 | 18 | 16.97 | 2.79 | 4.19 |  |  | 1 | 14 | 19 | 16.16 | 3.29 | 3.95 |  |
| 6 | 14 | 18 | 70.59 | 3.89 | 9.03 |  |  | 3 | 14 | 19 | 8.69 | 3.34 | 2.56 |  |
| 8 | 14 | 18 | 16.5 | 4.26 | 4.13 |  |  | 7 | 14 | 19 | 14.99 | 6.95 | 2.88 |  |
| 10 | 14 | 18 | 30.96 | 8.36 | 6.25 |  |  | 0 | 15 | 19 | 35.32 | 6.79 | 6.42 |  |
| 1 | 15 | 18 | 11.64 | 2.91 | 3.8 |  |  | 2 | 15 | 19 | 14.07 | 3.33 | 3.41 |  |
| 7 | 15 | 18 | 18.52 | 4.77 | 3.29 |  |  | 0 | 0 | 20 | 400.84 | 9.92 | 18.71 |  |
| 0 | 16 | 18 | 29.21 | 6.15 | 5.82 |  |  | 1 | 1 | 20 | 17.15 | 2.76 | 3.8 |  |
| 2 | 16 | 18 | 17.66 | 5.49 | 4.43 |  |  | 0 | 2 | 20 | 18.06 | 3.01 | 3.98 |  |
| 0 | 1 | 19 | 48.09 | 2.61 | 7.32 |  |  | 2 | 2 | 20 | 80.76 | 3.15 | 9.32 |  |
| 1 | 2 | 19 | 45.79 | 1.87 | 6.56 |  |  | 1 | 3 | 20 | 77.01 | 2.77 | 8.35 |  |
| 2 | 3 | 19 | 97.89 | 2.4 | 9.92 |  |  | 3 | 3 | 20 | 35.51 | 2.94 | 5.4 |  |
| 1 | 4 | 19 | 167.21 | 2.36 | 12.53 |  |  | 0 | 4 | 20 | 358.12 | 5.06 | 18.58 |  |
| 3 | 4 | 19 | 170.61 | 2.56 | 12.82 |  |  | 2 | 4 | 20 | 67.75 | 2.27 | 8.1 |  |
| 0 | 5 | 19 | 57.41 | 3.11 | 7.12 |  |  | 4 | 4 | 20 | 636.91 | 8.07 | 24.46 |  |
| 2 | 5 | 19 | 143.79 | 2.77 | 11.62 |  |  | 1 | 5 | 20 | 44.83 | 2.23 | 6.32 |  |
| 4 | 5 | 19 | 27.92 | 2.16 | 5.35 |  |  | 3 | 5 | 20 | 97.41 | 3.19 | 9.56 |  |
| 1 | 6 | 19 | 28.45 | 1.89 | 5.23 |  |  | 5 | 5 | 20 | 131.18 | 3.59 | 11.32 |  |
| 3 | 6 | 19 | 63.4 | 2.07 | 7.76 |  |  | 0 | 6 | 20 | 46.54 | 3.57 | 6.01 |  |
| 5 | 6 | 19 | 39.91 | 2.07 | 6.17 |  |  | 2 | 6 | 20 | 43.2 | 1.98 | 6.7 |  |
| 0 | 7 | 19 | 96.22 | 3.01 | 9.45 |  |  | 4 | 6 | 20 | 82.65 | 2.44 | 9.19 |  |
| 2 | 7 | 19 | 80.32 | 2.1 | 8.63 |  |  | 1 | 7 | 20 | 6.42 | 1.81 | 2.65 |  |
| 4 | 7 | 19 | 29.7 | 2.19 | 5.71 |  |  | 3 | 7 | 20 | 60.21 | 2.13 | 7.75 |  |
| 6 | 7 | 19 | 24.19 | 1.9 | 4.9 |  |  | 5 | 7 | 20 | 28.94 | 2.11 | 5.66 |  |
| 1 | 8 | 19 | 91.9 | 2.85 | 9.34 |  |  | 7 | 7 | 20 | 15.63 | 2.85 | 4.23 |  |
| 3 | 8 | 19 | 18.62 | 1.89 | 3.96 |  |  | 0 | 8 | 20 | 225.38 | 4.16 | 14.58 |  |
| 5 | 8 | 19 | 31.15 | 1.93 | 5.34 |  |  | 2 | 8 | 20 | 19.11 | 1.96 | 4.21 |  |
| 7 | 8 | 19 | 12.27 | 2.04 | 4.08 |  |  | 4 | 8 | 20 | 177.09 | 2.61 | 13.66 |  |
| 0 | 9 | 19 | 33.76 | 2.85 | 5.08 |  |  | 6 | 8 | 20 | 5.95 | 2.52 | 2.31 |  |
| 2 | 9 | 19 | 17.04 | 1.85 | 3.99 |  |  | 8 | 8 | 20 | 72.44 | 5.61 | 8.93 |  |
| 4 | 9 | 19 | 44.17 | 2 | 7.09 |  |  | 1 | 9 | 20 | 10.36 | 2.04 | 3.28 |  |
| 6 | 9 | 19 | 20.63 | 2.37 | 5.04 |  |  | 3 | 9 | 20 | 21.11 | 2.09 | 5.16 |  |
| 8 | 9 | 19 | 16.72 | 2.47 | 3.89 |  |  | 5 | 9 | 20 | 10.54 | 1.79 | 3.41 |  |
| 1 | 10 | 19 | 49.22 | 2.08 | 7.04 |  |  | 9 | 9 | 20 | 21.44 | 4.65 | 5.01 |  |
| 3 | 10 | 19 | 46.55 | 2.04 | 6.93 |  |  | 0 | 10 | 20 | 6.26 | 2.88 | 2.54 |  |
| 5 | 10 | 19 | 19.59 | 1.95 | 5.11 |  |  | 2 | 10 | 20 | 13.3 | 2.13 | 3.68 |  |
| 9 | 10 | 19 | 7.41 | 3.42 | 3.04 |  |  | 4 | 10 | 20 | 12.05 | 1.98 | 3.74 |  |
| 2 | 11 | 19 | 7.72 | 2.76 | 2.78 |  |  | 6 | 10 | 20 | 29.48 | 2.65 | 5.72 |  |
| 4 | 11 | 19 | 29.49 | 2.03 | 5.96 |  |  | 8 | 10 | 20 | 15.94 | 3.83 | 4.29 |  |
| 6 | 11 | 19 | 22.19 | 2.56 | 4.52 |  |  | 1 | 11 | 20 | 33 | 2.5 | 5.93 |  |
| 8 | 11 | 19 | 13.03 | 3.06 | 4.09 |  |  | 3 | 11 | 20 | 15.55 | 2.58 | 3.99 |  |
| 10 | 11 | 19 | 15.56 | 6.5 | 4.92 |  |  | 5 | 11 | 20 | 12.23 | 2.88 | 3.69 |  |
| 3 | 12 | 19 | 27.74 | 2.44 | 5.56 |  |  | 0 | 12 | 20 | 65.77 | 4.07 | 8.75 |  |
| 5 | 12 | 19 | 14.38 | 3.9 | 3.63 |  |  | 2 | 12 | 20 | 27.89 | 2.47 | 5.53 |  |
| 7 | 12 | 19 | 16.54 | 3.03 | 4.72 |  |  | 4 | 12 | 20 | 101.91 | 4.09 | 10.52 |  |
| 9 | 12 | 19 | 10.55 | 3.94 | 3.95 |  |  | 8 | 12 | 20 | 49.23 | 8.87 | 7.8 |  |

| h | k | l | Fcal^2 | Fobs^2 | (Fobs^2) | |  | h | k | l | Fcal^2 | Fobs^2 | (Fobs^2) | |
| --- | --- | --- | --- | --- | --- | --- | --- | --- | --- | --- | --- | --- | --- | --- |
|  |  |  |  |  |  |  |  |  |  |  |  |  |  |  |
| 1 | 13 | 20 | 18.8 | 2.94 | 4.64 |  |  | 2 | 10 | 22 | 37.73 | 5.29 | 6.85 |  |
| 3 | 15 | 20 | 15.46 | 7.35 | 3.27 |  |  | 6 | 10 | 22 | 51.4 | 10.06 | 7.24 |  |
| 0 | 1 | 21 | 56.75 | 3.58 | 7.36 |  |  | 0 | 1 | 23 | 22.56 | 4.07 | 4.94 |  |
| 1 | 2 | 21 | 44.92 | 2.25 | 6.61 |  |  | 1 | 2 | 23 | 23.03 | 2.5 | 4.75 |  |
| 0 | 3 | 21 | 25.9 | 4.38 | 5.47 |  |  | 0 | 3 | 23 | 35.67 | 3.5 | 6.87 |  |
| 2 | 3 | 21 | 28.5 | 2.13 | 5.15 |  |  | 2 | 3 | 23 | 10.07 | 2.36 | 2.9 |  |
| 1 | 4 | 21 | 28.17 | 2.59 | 4.86 |  |  | 3 | 4 | 23 | 10.26 | 2.98 | 2.88 |  |
| 3 | 4 | 21 | 53.53 | 2.22 | 7.08 |  |  | 2 | 5 | 23 | 19.89 | 2.7 | 3.9 |  |
| 0 | 5 | 21 | 7.94 | 2.94 | 2.69 |  |  | 4 | 5 | 23 | 20.05 | 3.28 | 4.37 |  |
| 2 | 5 | 21 | 46.15 | 2.3 | 6.75 |  |  | 1 | 6 | 23 | 11.6 | 2.59 | 3.79 |  |
| 4 | 5 | 21 | 35.74 | 2.16 | 5.78 |  |  | 0 | 0 | 24 | 89.11 | 10.15 | 9.31 |  |
| 1 | 6 | 21 | 13.16 | 2.02 | 3.6 |  |  | 1 | 3 | 24 | 10.87 | 4.59 | 2.85 |  |
| 3 | 6 | 21 | 33.91 | 2.27 | 5.92 |  |  | 0 | 4 | 24 | 62.1 | 5.45 | 8.44 |  |
| 5 | 6 | 21 | 16.65 | 2.07 | 4.29 |  |  | 4 | 4 | 24 | 33.96 | 11.3 | 6.23 |  |
| 0 | 7 | 21 | 25.16 | 2.85 | 4.86 |  |  | 1 | 5 | 24 | 20.74 | 4.72 | 4.87 |  |
| 2 | 7 | 21 | 13.65 | 2.31 | 3.7 |  |  | 3 | 5 | 24 | 22.81 | 7.61 | 1.54 |  |
| 4 | 7 | 21 | 45.26 | 2.6 | 6.93 |  |  | 0 | 8 | 24 | 33.93 | 7.42 | 6.37 |  |
| 1 | 8 | 21 | 19.43 | 2.07 | 4.7 |  |  | 4 | 8 | 24 | 30.33 | 14.99 | 5.45 |  |
| 0 | 9 | 21 | 15.91 | 3.1 | 4.17 |  |  |  |  |  |  |  |  |  |
| 2 | 9 | 21 | 10.24 | 2.92 | 3.13 |  |  |  |  |  |  |  |  |  |
| 4 | 9 | 21 | 22.69 | 2.4 | 5.07 |  |  |  |  |  |  |  |  |  |
| 8 | 9 | 21 | 17.32 | 8.3 | 3.74 |  |  |  |  |  |  |  |  |  |
| 1 | 10 | 21 | 5.52 | 3.18 | 2.76 |  |  |  |  |  |  |  |  |  |
| 3 | 10 | 21 | 7.78 | 3.77 | 2.9 |  |  |  |  |  |  |  |  |  |
| 5 | 10 | 21 | 14.78 | 2.88 | 3.79 |  |  |  |  |  |  |  |  |  |
| 2 | 11 | 21 | 12.48 | 2.99 | 3.98 |  |  |  |  |  |  |  |  |  |
| 6 | 11 | 21 | 11.9 | 5.72 | 3.5 |  |  |  |  |  |  |  |  |  |
| 3 | 12 | 21 | 14.45 | 3.92 | 3.99 |  |  |  |  |  |  |  |  |  |
| 0 | 0 | 22 | 170.27 | 11.99 | 13.54 |  |  |  |  |  |  |  |  |  |
| 2 | 2 | 22 | 200.43 | 4.39 | 13.66 |  |  |  |  |  |  |  |  |  |
| 1 | 3 | 22 | 33.54 | 2.3 | 5.55 |  |  |  |  |  |  |  |  |  |
| 3 | 3 | 22 | 23.99 | 3.1 | 5.37 |  |  |  |  |  |  |  |  |  |
| 2 | 4 | 22 | 31.56 | 2.22 | 5.67 |  |  |  |  |  |  |  |  |  |
| 4 | 4 | 22 | 34.72 | 3.1 | 6.07 |  |  |  |  |  |  |  |  |  |
| 1 | 5 | 22 | 15.75 | 2.36 | 3.98 |  |  |  |  |  |  |  |  |  |
| 3 | 5 | 22 | 16.21 | 2.2 | 4.02 |  |  |  |  |  |  |  |  |  |
| 5 | 5 | 22 | 17.97 | 3.26 | 4.35 |  |  |  |  |  |  |  |  |  |
| 0 | 6 | 22 | 37.94 | 3.48 | 6 |  |  |  |  |  |  |  |  |  |
| 2 | 6 | 22 | 140.78 | 3.67 | 11.94 |  |  |  |  |  |  |  |  |  |
| 6 | 6 | 22 | 61.05 | 6.69 | 8.65 |  |  |  |  |  |  |  |  |  |
| 1 | 7 | 22 | 27.39 | 2.39 | 5.36 |  |  |  |  |  |  |  |  |  |
| 3 | 7 | 22 | 14.45 | 2.8 | 4.22 |  |  |  |  |  |  |  |  |  |
| 7 | 7 | 22 | 15.16 | 6.69 | 2.91 |  |  |  |  |  |  |  |  |  |
| 0 | 8 | 22 | 6.53 | 3.01 | 2.48 |  |  |  |  |  |  |  |  |  |
| 2 | 8 | 22 | 19.54 | 2.56 | 4.56 |  |  |  |  |  |  |  |  |  |
| 6 | 8 | 22 | 9.41 | 4.23 | 3.5 |  |  |  |  |  |  |  |  |  |
| 1 | 9 | 22 | 16.72 | 2.76 | 3.92 |  |  |  |  |  |  |  |  |  |
| 3 | 9 | 22 | 11.95 | 2.66 | 3.92 |  |  |  |  |  |  |  |  |  |

Crystal 2

| h | k | l | Fcal^2 | Fobs^2 | σ(Fobs^2) | |  | h | k | l | Fcal^2 | Fobs^2 | σ(Fobs^2) | |
| --- | --- | --- | --- | --- | --- | --- | --- | --- | --- | --- | --- | --- | --- | --- |
|  |  |  |  |  |  |  |  |  |  |  |  |  |  |  |
| 0 | 0 | 2 | 68867.93 | 793.27 | 240.15 |  |  | 1 | 6 | 7 | 2812.05 | 13.91 | 53.15 |  |
| 1 | 1 | 2 | 54363.54 | 346.83 | 223.6 |  |  | 3 | 6 | 7 | 4623.66 | 20.5 | 68.4 |  |
| 0 | 2 | 2 | 19141.59 | 159.95 | 127.51 |  |  | 5 | 6 | 7 | 2550.17 | 14.41 | 52.32 |  |
| 2 | 2 | 2 | 161393.7 | 1844.16 | 358.44 |  |  | 0 | 7 | 7 | 4623.56 | 42.15 | 69.8 |  |
| 0 | 1 | 3 | 15502.59 | 90.5 | 113.16 |  |  | 2 | 7 | 7 | 2634.96 | 19.06 | 49.04 |  |
| 1 | 2 | 3 | 2559.58 | 13.57 | 47.11 |  |  | 4 | 7 | 7 | 3414.5 | 25.96 | 57.94 |  |
| 0 | 3 | 3 | 4176.88 | 39.99 | 56.28 |  |  | 6 | 7 | 7 | 3566.35 | 27.12 | 59.4 |  |
| 2 | 3 | 3 | 28602.96 | 254.49 | 162.9 |  |  | 0 | 0 | 8 | 40720.97 | 411.77 | 199.65 |  |
| 0 | 0 | 4 | 36.73 | 7.57 | 6.4 |  |  | 1 | 1 | 8 | 817.53 | 9.17 | 29.37 |  |
| 1 | 1 | 4 | 12173.84 | 70.26 | 108.42 |  |  | 0 | 2 | 8 | 472.02 | 7.64 | 23.39 |  |
| 0 | 2 | 4 | 2416.58 | 17.18 | 46.22 |  |  | 2 | 2 | 8 | 7186.64 | 42.01 | 84.61 |  |
| 2 | 2 | 4 | 16376.22 | 276.38 | 126 |  |  | 1 | 3 | 8 | 4121.18 | 19.18 | 62.32 |  |
| 1 | 3 | 4 | 25806.23 | 119.13 | 153.88 |  |  | 3 | 3 | 8 | 1970.56 | 15.83 | 43.02 |  |
| 3 | 3 | 4 | 29565.77 | 167.17 | 165.9 |  |  | 0 | 4 | 8 | 23817.34 | 128.69 | 156.59 |  |
| 0 | 4 | 4 | 73605.54 | 591.17 | 265.51 |  |  | 2 | 4 | 8 | 5855.54 | 25.33 | 75.01 |  |
| 2 | 4 | 4 | 23821.38 | 252.5 | 148.18 |  |  | 4 | 4 | 8 | 15855.96 | 93.99 | 129.16 |  |
| 4 | 4 | 4 | 93865.02 | 1112.83 | 297.84 |  |  | 1 | 5 | 8 | 6557.8 | 27.42 | 80.33 |  |
| 0 | 1 | 5 | 1342.06 | 17.29 | 36.26 |  |  | 3 | 5 | 8 | 1796.08 | 9.96 | 43.8 |  |
| 1 | 2 | 5 | 2644.17 | 13.48 | 50.55 |  |  | 5 | 5 | 8 | 1168.03 | 13.75 | 33.57 |  |
| 0 | 3 | 5 | 901.79 | 8.76 | 29.41 |  |  | 0 | 6 | 8 | 6876.85 | 41.27 | 81.34 |  |
| 2 | 3 | 5 | 13650.67 | 301.68 | 113.26 |  |  | 2 | 6 | 8 | 867.34 | 6.48 | 31.67 |  |
| 1 | 4 | 5 | 6193.93 | 27.83 | 79.41 |  |  | 6 | 6 | 8 | 1556.47 | 27.89 | 41.26 |  |
| 2 | 5 | 5 | 321.9 | 5.69 | 18.53 |  |  | 1 | 7 | 8 | 2864.55 | 23.51 | 51.54 |  |
| 4 | 5 | 5 | 10877.25 | 73.51 | 102.4 |  |  | 3 | 7 | 8 | 4010.23 | 21.37 | 62.81 |  |
| 0 | 0 | 6 | 1465.74 | 23.78 | 34.16 |  |  | 5 | 7 | 8 | 3090.85 | 50.68 | 55.74 |  |
| 1 | 1 | 6 | 4760.87 | 56.13 | 64.94 |  |  | 7 | 7 | 8 | 2382.53 | 22.16 | 48.29 |  |
| 0 | 2 | 6 | 5324.21 | 33.24 | 71.15 |  |  | 0 | 8 | 8 | 21925.88 | 197.78 | 143.92 |  |
| 2 | 2 | 6 | 38832.77 | 202.12 | 192.55 |  |  | 2 | 8 | 8 | 3740.56 | 30.89 | 62.01 |  |
| 3 | 3 | 6 | 6397.65 | 47.49 | 78.56 |  |  | 6 | 8 | 8 | 2718.6 | 24.45 | 51.87 |  |
| 2 | 4 | 6 | 5151.79 | 23.22 | 70.65 |  |  | 8 | 8 | 8 | 6595.73 | 94.71 | 81.22 |  |
| 4 | 4 | 6 | 4127.4 | 28.65 | 63.53 |  |  | 0 | 1 | 9 | 7388.62 | 43.56 | 84.21 |  |
| 1 | 5 | 6 | 8327.9 | 38.9 | 86.93 |  |  | 1 | 2 | 9 | 5539.02 | 23.75 | 73.54 |  |
| 3 | 5 | 6 | 8053.08 | 33.71 | 86.38 |  |  | 0 | 3 | 9 | 1982.04 | 14.89 | 46.14 |  |
| 5 | 5 | 6 | 9789.47 | 63.02 | 97.64 |  |  | 2 | 3 | 9 | 1387.02 | 8.36 | 37.61 |  |
| 0 | 6 | 6 | 6276.01 | 56.2 | 74.46 |  |  | 1 | 4 | 9 | 1311.62 | 8.56 | 37.43 |  |
| 2 | 6 | 6 | 25596.64 | 187.61 | 161.12 |  |  | 3 | 4 | 9 | 4103.71 | 18.36 | 63.76 |  |
| 4 | 6 | 6 | 8175.13 | 51.18 | 89.17 |  |  | 0 | 5 | 9 | 1266.99 | 11.35 | 33.22 |  |
| 1 | 2 | 7 | 5659.11 | 31.32 | 74.5 |  |  | 2 | 5 | 9 | 2950.3 | 14.56 | 57.27 |  |
| 0 | 3 | 7 | 1389.27 | 12.43 | 40 |  |  | 4 | 5 | 9 | 1464.27 | 10.12 | 39.46 |  |
| 2 | 3 | 7 | 3949.08 | 20.24 | 58.84 |  |  | 1 | 6 | 9 | 2223.72 | 12.84 | 44.41 |  |
| 1 | 4 | 7 | 4561.91 | 21.1 | 67.06 |  |  | 3 | 6 | 9 | 1498.61 | 9.7 | 38.37 |  |
| 3 | 4 | 7 | 2587.98 | 14.96 | 50.35 |  |  | 5 | 6 | 9 | 843.68 | 9.29 | 25.35 |  |
| 0 | 5 | 7 | 2193.3 | 19.11 | 46.38 |  |  | 0 | 7 | 9 | 3356.64 | 24.06 | 56.31 |  |
| 2 | 5 | 7 | 1529.26 | 9.68 | 38.32 |  |  | 2 | 7 | 9 | 3550.71 | 17.15 | 59.85 |  |
| 4 | 5 | 7 | 4416.19 | 20.8 | 65.44 |  |  | 6 | 7 | 9 | 1098.29 | 9.7 | 33.06 |  |

| h | k | l | Fcal^2 | Fobs^2 | (Fobs^2) | |  | h | k | l | Fcal^2 | Fobs^2 | (Fobs^2) | |
| --- | --- | --- | --- | --- | --- | --- | --- | --- | --- | --- | --- | --- | --- | --- |
|  |  |  |  |  |  |  |  |  |  |  |  |  |  |  |
| 3 | 8 | 9 | 1329.69 | 9.31 | 37.71 |  |  | 4 | 5 | 11 | 1442.66 | 9.83 | 37.39 |  |
| 5 | 8 | 9 | 1701.47 | 15.34 | 42.4 |  |  | 1 | 6 | 11 | 1427.46 | 12.41 | 40.01 |  |
| 7 | 8 | 9 | 669.28 | 10.49 | 26.39 |  |  | 3 | 6 | 11 | 1744.76 | 12.89 | 40.98 |  |
| 0 | 9 | 9 | 2401.29 | 25.94 | 46.14 |  |  | 5 | 6 | 11 | 436.66 | 7.98 | 22.7 |  |
| 2 | 9 | 9 | 1673.8 | 14.89 | 43.89 |  |  | 0 | 7 | 11 | 1163.23 | 12.23 | 38.28 |  |
| 4 | 9 | 9 | 371.64 | 9.17 | 18.26 |  |  | 2 | 7 | 11 | 1045.3 | 9.37 | 30.08 |  |
| 6 | 9 | 9 | 1364.17 | 18.29 | 37.93 |  |  | 4 | 7 | 11 | 2104.3 | 16.27 | 47.31 |  |
| 8 | 9 | 9 | 415.17 | 12.59 | 20.78 |  |  | 6 | 7 | 11 | 102.48 | 5.25 | 11.13 |  |
| 0 | 0 | 10 | 23940.19 | 249.65 | 152.29 |  |  | 1 | 8 | 11 | 1264.33 | 9.73 | 35.56 |  |
| 1 | 1 | 10 | 521.12 | 8 | 21.81 |  |  | 3 | 8 | 11 | 41.11 | 5.52 | 4.18 |  |
| 0 | 2 | 10 | 624.74 | 8.76 | 24.18 |  |  | 5 | 8 | 11 | 21.62 | 5.55 | 4.04 |  |
| 2 | 2 | 10 | 18285.68 | 98.94 | 136.1 |  |  | 7 | 8 | 11 | 73.45 | 8.64 | 10.52 |  |
| 1 | 3 | 10 | 2378.19 | 12.29 | 49.31 |  |  | 0 | 9 | 11 | 570.62 | 10.3 | 25.38 |  |
| 3 | 3 | 10 | 7446.37 | 42.37 | 84.56 |  |  | 2 | 9 | 11 | 517.2 | 7.28 | 23.1 |  |
| 2 | 4 | 10 | 4306.66 | 19.3 | 62.32 |  |  | 4 | 9 | 11 | 535.71 | 15.49 | 23.71 |  |
| 4 | 4 | 10 | 3537.37 | 25.52 | 61.11 |  |  | 6 | 9 | 11 | 382.5 | 9.92 | 20.32 |  |
| 1 | 5 | 10 | 2360.95 | 13.2 | 47.34 |  |  | 8 | 9 | 11 | 647.44 | 11.75 | 25.59 |  |
| 3 | 5 | 10 | 1391.69 | 9.44 | 37.42 |  |  | 1 | 10 | 11 | 103.43 | 7.05 | 12.35 |  |
| 5 | 5 | 10 | 529.86 | 9.53 | 20.62 |  |  | 3 | 10 | 11 | 331.84 | 6.48 | 19.45 |  |
| 0 | 6 | 10 | 1522.52 | 20.15 | 40.79 |  |  | 5 | 10 | 11 | 280.6 | 7.96 | 16.42 |  |
| 2 | 6 | 10 | 16370.8 | 63.14 | 127.75 |  |  | 7 | 10 | 11 | 406.25 | 10.8 | 19.79 |  |
| 4 | 6 | 10 | 838.92 | 8.79 | 28.71 |  |  | 9 | 10 | 11 | 341.72 | 10.39 | 17.08 |  |
| 6 | 6 | 10 | 4390.46 | 30.94 | 67.82 |  |  | 2 | 11 | 11 | 647.75 | 11.46 | 23.23 |  |
| 1 | 7 | 10 | 2014.68 | 11.73 | 45.7 |  |  | 4 | 11 | 11 | 38.11 | 11.89 | 5.88 |  |
| 3 | 7 | 10 | 736.51 | 7.02 | 30.05 |  |  | 6 | 11 | 11 | 794.32 | 14.89 | 27.66 |  |
| 5 | 7 | 10 | 1216.7 | 9.83 | 35.56 |  |  | 8 | 11 | 11 | 800.89 | 19.48 | 26.85 |  |
| 7 | 7 | 10 | 465.47 | 13.76 | 23.01 |  |  | 10 | 11 | 11 | 152.39 | 14.89 | 11.96 |  |
| 0 | 8 | 10 | 1791.38 | 21.07 | 43.96 |  |  | 0 | 0 | 12 | 12158.09 | 513.36 | 113.13 |  |
| 2 | 8 | 10 | 1993.17 | 11.89 | 45.45 |  |  | 0 | 2 | 12 | 2199.86 | 19.06 | 47.54 |  |
| 4 | 8 | 10 | 282.86 | 7.39 | 17.4 |  |  | 2 | 2 | 12 | 1619.78 | 14.12 | 40.29 |  |
| 6 | 8 | 10 | 867.16 | 10.07 | 30.63 |  |  | 1 | 3 | 12 | 1274.73 | 9.04 | 35 |  |
| 8 | 8 | 10 | 625.76 | 14.89 | 25.14 |  |  | 3 | 3 | 12 | 863.59 | 11.39 | 28.68 |  |
| 1 | 9 | 10 | 929.46 | 8.36 | 30.15 |  |  | 0 | 4 | 12 | 9190.01 | 51.55 | 96.53 |  |
| 3 | 9 | 10 | 819.23 | 8.25 | 26.48 |  |  | 2 | 4 | 12 | 576.33 | 6.74 | 23.95 |  |
| 5 | 9 | 10 | 868.12 | 12.04 | 29.77 |  |  | 4 | 4 | 12 | 12083.21 | 69.85 | 110.01 |  |
| 7 | 9 | 10 | 402.16 | 9.7 | 20.85 |  |  | 1 | 5 | 12 | 1598.37 | 19.23 | 41.72 |  |
| 9 | 9 | 10 | 426.45 | 16.05 | 18.65 |  |  | 3 | 5 | 12 | 1441.95 | 10.27 | 37.79 |  |
| 0 | 10 | 10 | 186.78 | 12.97 | 15.24 |  |  | 5 | 5 | 12 | 1278.47 | 16.61 | 36.63 |  |
| 2 | 10 | 10 | 4387.06 | 32.62 | 67.71 |  |  | 0 | 6 | 12 | 220.67 | 9.17 | 16.93 |  |
| 4 | 10 | 10 | 898.05 | 13.36 | 30.69 |  |  | 2 | 6 | 12 | 1803.24 | 14.95 | 43.26 |  |
| 6 | 10 | 10 | 4650.01 | 38.59 | 67.95 |  |  | 4 | 6 | 12 | 2153.19 | 19.45 | 47.65 |  |
| 8 | 10 | 10 | 366.34 | 15.23 | 19.87 |  |  | 6 | 6 | 12 | 33.61 | 8.41 | 5.97 |  |
| 10 | 10 | 10 | 2535.83 | 49.67 | 48.34 |  |  | 1 | 7 | 12 | 140.43 | 7.35 | 10.65 |  |
| 0 | 1 | 11 | 3329.88 | 22.93 | 58.45 |  |  | 3 | 7 | 12 | 876.09 | 8.5 | 29.55 |  |
| 1 | 2 | 11 | 2658.21 | 15.91 | 51.9 |  |  | 5 | 7 | 12 | 505.21 | 7.66 | 23.2 |  |
| 0 | 3 | 11 | 2850.32 | 21.62 | 54.71 |  |  | 7 | 7 | 12 | 416.55 | 9.53 | 20.78 |  |
| 2 | 3 | 11 | 833.76 | 7.28 | 29.29 |  |  | 0 | 8 | 12 | 3998.57 | 39.99 | 65.82 |  |
| 2 | 5 | 11 | 2309.33 | 12.43 | 48.63 |  |  | 2 | 8 | 12 | 349.07 | 7.44 | 18.42 |  |

| h | k | l | Fcal^2 | Fobs^2 | (Fobs^2) | |  | h | k | l | Fcal^2 | Fobs^2 | (Fobs^2) | |
| --- | --- | --- | --- | --- | --- | --- | --- | --- | --- | --- | --- | --- | --- | --- |
|  |  |  |  |  |  |  |  |  |  |  |  |  |  |  |
| 4 | 8 | 12 | 2656.97 | 20.34 | 52.33 |  |  | 4 | 9 | 13 | 403.58 | 13.74 | 20.97 |  |
| 6 | 8 | 12 | 52.56 | 5.4 | 9.01 |  |  | 6 | 9 | 13 | 562.36 | 20.15 | 24.78 |  |
| 8 | 8 | 12 | 2824.67 | 29.41 | 51.71 |  |  | 8 | 9 | 13 | 303.79 | 10.79 | 16.72 |  |
| 1 | 9 | 12 | 233.92 | 8.68 | 16.93 |  |  | 1 | 10 | 13 | 279.42 | 8.11 | 17.22 |  |
| 3 | 9 | 12 | 766.04 | 8.9 | 28.79 |  |  | 3 | 10 | 13 | 571.75 | 8.11 | 24.26 |  |
| 5 | 9 | 12 | 362.26 | 8.99 | 20.49 |  |  | 5 | 10 | 13 | 447.93 | 9.68 | 20.92 |  |
| 7 | 9 | 12 | 424.95 | 10.25 | 21.63 |  |  | 7 | 10 | 13 | 116.73 | 9.76 | 9.42 |  |
| 9 | 9 | 12 | 317.92 | 14.52 | 18.27 |  |  | 9 | 10 | 13 | 76.97 | 10.59 | 8.42 |  |
| 0 | 10 | 12 | 122.39 | 8.76 | 11.86 |  |  | 2 | 11 | 13 | 232.01 | 8.51 | 15.06 |  |
| 2 | 10 | 12 | 100.04 | 5.91 | 9.81 |  |  | 4 | 11 | 13 | 494.34 | 14.34 | 22.7 |  |
| 4 | 10 | 12 | 647.89 | 12.11 | 21.52 |  |  | 6 | 11 | 13 | 217.09 | 9.16 | 15.54 |  |
| 6 | 10 | 12 | 566.9 | 9.83 | 23.41 |  |  | 8 | 11 | 13 | 74.83 | 10.51 | 6.99 |  |
| 8 | 10 | 12 | 391.79 | 11.59 | 19.82 |  |  | 10 | 11 | 13 | 140.16 | 11.48 | 11.3 |  |
| 10 | 10 | 12 | 325.94 | 19.11 | 17.01 |  |  | 1 | 12 | 13 | 172.38 | 7.96 | 14.42 |  |
| 1 | 11 | 12 | 613.98 | 8.65 | 25.21 |  |  | 3 | 12 | 13 | 163.18 | 7.15 | 14.37 |  |
| 3 | 11 | 12 | 785.78 | 9.04 | 27.01 |  |  | 5 | 12 | 13 | 137.78 | 9.58 | 13.06 |  |
| 5 | 11 | 12 | 416.4 | 9.44 | 20 |  |  | 7 | 12 | 13 | 211.36 | 11.33 | 14.4 |  |
| 7 | 11 | 12 | 149.44 | 10.39 | 12.46 |  |  | 9 | 12 | 13 | 148.72 | 11.89 | 12.06 |  |
| 9 | 11 | 12 | 96.96 | 10.61 | 9.29 |  |  | 11 | 12 | 13 | 70.55 | 12.66 | 8.31 |  |
| 11 | 11 | 12 | 129.14 | 17.95 | 9.63 |  |  | 0 | 13 | 13 | 145.88 | 17.29 | 10.84 |  |
| 0 | 12 | 12 | 1692.86 | 27.02 | 40.89 |  |  | 2 | 13 | 13 | 58.29 | 10.7 | 9.29 |  |
| 2 | 12 | 12 | 743.09 | 12.99 | 28.35 |  |  | 4 | 13 | 13 | 123.77 | 10.62 | 9.99 |  |
| 4 | 12 | 12 | 2823.27 | 29.41 | 52.54 |  |  | 6 | 13 | 13 | 252.36 | 13.76 | 16.37 |  |
| 6 | 12 | 12 | 55.89 | 11.46 | 9.47 |  |  | 8 | 13 | 13 | 114.32 | 16.42 | 6.58 |  |
| 8 | 12 | 12 | 1216.93 | 22.16 | 33.19 |  |  | 10 | 13 | 13 | 57.97 | 25.94 | 7.68 |  |
| 10 | 12 | 12 | 120.94 | 15.65 | 9.99 |  |  | 0 | 0 | 14 | 364.52 | 19.45 | 17.99 |  |
| 12 | 12 | 12 | 775.53 | 35.82 | 25.29 |  |  | 1 | 1 | 14 | 1850.98 | 17.58 | 42.82 |  |
| 0 | 1 | 13 | 493.3 | 9.53 | 23.34 |  |  | 0 | 2 | 14 | 1068.1 | 12.99 | 33.01 |  |
| 1 | 2 | 13 | 415.86 | 7.02 | 20.89 |  |  | 2 | 2 | 14 | 5950.77 | 39.35 | 78.36 |  |
| 0 | 3 | 13 | 641.66 | 10.7 | 26.21 |  |  | 1 | 3 | 14 | 1222.76 | 10.12 | 36.13 |  |
| 2 | 3 | 13 | 1227.14 | 10.49 | 35.69 |  |  | 3 | 3 | 14 | 188.61 | 9.17 | 15.01 |  |
| 1 | 4 | 13 | 1658.55 | 11.21 | 41.39 |  |  | 0 | 4 | 14 | 1149.94 | 17.29 | 33.51 |  |
| 3 | 4 | 13 | 1126.78 | 10.82 | 34.06 |  |  | 2 | 4 | 14 | 581.74 | 8.93 | 26.25 |  |
| 0 | 5 | 13 | 40.34 | 7.64 | 4.01 |  |  | 4 | 4 | 14 | 773.91 | 11.83 | 28.57 |  |
| 2 | 5 | 13 | 2406.49 | 19.2 | 51.1 |  |  | 1 | 5 | 14 | 64.27 | 6.07 | 8.04 |  |
| 4 | 5 | 13 | 804.23 | 10.03 | 28.66 |  |  | 3 | 5 | 14 | 252.84 | 6.74 | 16.85 |  |
| 1 | 6 | 13 | 721.74 | 8.11 | 26.78 |  |  | 5 | 5 | 14 | 1779.21 | 17.95 | 42.57 |  |
| 3 | 6 | 13 | 344.96 | 6.88 | 18.69 |  |  | 0 | 6 | 14 | 408.95 | 10.3 | 20.81 |  |
| 5 | 6 | 13 | 23.32 | 4.67 | 6.03 |  |  | 2 | 6 | 14 | 3769.29 | 19.97 | 62.23 |  |
| 0 | 7 | 13 | 594 | 11.46 | 26.58 |  |  | 4 | 6 | 14 | 185.17 | 6.34 | 12.97 |  |
| 2 | 7 | 13 | 1019.66 | 9.44 | 31.73 |  |  | 6 | 6 | 14 | 1854.74 | 21.01 | 44.09 |  |
| 4 | 7 | 13 | 368.32 | 8.4 | 19.16 |  |  | 1 | 7 | 14 | 490.2 | 9.94 | 23.57 |  |
| 6 | 7 | 13 | 248.97 | 8.84 | 18.03 |  |  | 3 | 7 | 14 | 93.92 | 6.2 | 11.35 |  |
| 1 | 8 | 13 | 670.18 | 8.23 | 27.66 |  |  | 5 | 7 | 14 | 152.93 | 7.15 | 12.32 |  |
| 5 | 8 | 13 | 24.4 | 8.21 | 4.98 |  |  | 7 | 7 | 14 | 545.03 | 12.16 | 23.7 |  |
| 7 | 8 | 13 | 425.44 | 14.88 | 20.08 |  |  | 0 | 8 | 14 | 613.86 | 22.16 | 21.79 |  |
| 0 | 9 | 13 | 630.96 | 12.23 | 24.24 |  |  | 2 | 8 | 14 | 485.11 | 8.5 | 21.51 |  |
| 2 | 9 | 13 | 20.92 | 9.17 | 7.3 |  |  | 4 | 8 | 14 | 104.78 | 7.07 | 11.73 |  |

| h | k | l | Fcal^2 | Fobs^2 | (Fobs^2) | |  | h | k | l | Fcal^2 | Fobs^2 | (Fobs^2) | |
| --- | --- | --- | --- | --- | --- | --- | --- | --- | --- | --- | --- | --- | --- | --- |
|  |  |  |  |  |  |  |  |  |  |  |  |  |  |  |
| 6 | 8 | 14 | 292.99 | 9.94 | 17.06 |  |  | 1 | 8 | 15 | 506.5 | 8.5 | 22.66 |  |
| 8 | 8 | 14 | 174.64 | 11.39 | 15.08 |  |  | 3 | 8 | 15 | 390.8 | 9.55 | 19.96 |  |
| 1 | 9 | 14 | 848.07 | 9.31 | 28.45 |  |  | 5 | 8 | 15 | 198.66 | 8.75 | 15 |  |
| 3 | 9 | 14 | 225.29 | 8.3 | 15.03 |  |  | 7 | 8 | 15 | 222.7 | 8.23 | 16.09 |  |
| 5 | 9 | 14 | 71.9 | 7.28 | 7.52 |  |  | 0 | 9 | 15 | 494.61 | 12.59 | 20.98 |  |
| 7 | 9 | 14 | 213.14 | 10.9 | 16.36 |  |  | 2 | 9 | 15 | 205.31 | 7.69 | 14.46 |  |
| 9 | 9 | 14 | 360.94 | 17.95 | 16.77 |  |  | 4 | 9 | 15 | 22.43 | 8.79 | 4.37 |  |
| 0 | 10 | 14 | 471.65 | 12.23 | 23.31 |  |  | 6 | 9 | 15 | 242.26 | 8.96 | 16.46 |  |
| 2 | 10 | 14 | 2079.17 | 15.53 | 45.08 |  |  | 8 | 9 | 15 | 148.37 | 24.42 | 12.02 |  |
| 4 | 10 | 14 | 94.8 | 8.51 | 12.02 |  |  | 1 | 10 | 15 | 339.04 | 11.27 | 19.84 |  |
| 6 | 10 | 14 | 1664.23 | 16.66 | 38.77 |  |  | 3 | 10 | 15 | 28.48 | 7.93 | 5.3 |  |
| 8 | 10 | 14 | 175.08 | 18.49 | 12.87 |  |  | 5 | 10 | 15 | 120.7 | 7.82 | 11.65 |  |
| 10 | 10 | 14 | 636.41 | 19.11 | 23.6 |  |  | 7 | 10 | 15 | 85.44 | 8.02 | 9.4 |  |
| 1 | 11 | 14 | 123.36 | 7.42 | 8.79 |  |  | 9 | 10 | 15 | 46.58 | 16.76 | 6.86 |  |
| 3 | 11 | 14 | 301.81 | 7.54 | 19.5 |  |  | 0 | 11 | 15 | 77.48 | 11.06 | 8.93 |  |
| 5 | 11 | 14 | 265.3 | 12.31 | 17.09 |  |  | 2 | 11 | 15 | 137.15 | 7.96 | 10.86 |  |
| 7 | 11 | 14 | 83.89 | 8.67 | 11.88 |  |  | 4 | 11 | 15 | 268.33 | 11.06 | 17.23 |  |
| 0 | 12 | 14 | 45.33 | 10.62 | 7.59 |  |  | 6 | 11 | 15 | 42.47 | 8.9 | 4.81 |  |
| 2 | 12 | 14 | 146.93 | 7.82 | 11.74 |  |  | 8 | 11 | 15 | 37.17 | 16.05 | 5.28 |  |
| 4 | 12 | 14 | 113.48 | 9.97 | 11.36 |  |  | 10 | 11 | 15 | 77.64 | 15.64 | 8.08 |  |
| 6 | 12 | 14 | 113.08 | 9.27 | 11.81 |  |  | 3 | 12 | 15 | 121.96 | 7.39 | 11.88 |  |
| 8 | 12 | 14 | 93.84 | 12.15 | 7.83 |  |  | 5 | 12 | 15 | 94.57 | 10.49 | 8.74 |  |
| 12 | 12 | 14 | 93.92 | 27.48 | 7.82 |  |  | 0 | 13 | 15 | 146.39 | 12.59 | 11.8 |  |
| 1 | 13 | 14 | 115.67 | 7.82 | 10.69 |  |  | 2 | 13 | 15 | 37.63 | 8.62 | 7.24 |  |
| 3 | 13 | 14 | 111.54 | 7.92 | 10.42 |  |  | 4 | 13 | 15 | 34.27 | 14.12 | 6.03 |  |
| 5 | 13 | 14 | 73.28 | 9.4 | 8.31 |  |  | 6 | 13 | 15 | 76.11 | 10.59 | 9.09 |  |
| 7 | 13 | 14 | 62.79 | 11.46 | 7.49 |  |  | 8 | 13 | 15 | 88.27 | 14.79 | 8.12 |  |
| 9 | 13 | 14 | 34.24 | 16.81 | 6.1 |  |  | 1 | 14 | 15 | 35.87 | 11.83 | 4.6 |  |
| 2 | 14 | 14 | 463.86 | 13.36 | 22.48 |  |  | 3 | 14 | 15 | 41.95 | 12.59 | 7.04 |  |
| 4 | 14 | 14 | 151.98 | 14.52 | 12.64 |  |  | 5 | 14 | 15 | 94.5 | 12.2 | 9.75 |  |
| 6 | 14 | 14 | 800.61 | 22.12 | 25.64 |  |  | 7 | 14 | 15 | 50.81 | 15.99 | 7.48 |  |
| 10 | 14 | 14 | 142.14 | 58.36 | 14.23 |  |  | 0 | 0 | 16 | 2728 | 50.8 | 52.52 |  |
| 0 | 1 | 15 | 111.51 | 8.76 | 10.94 |  |  | 1 | 1 | 16 | 1184.71 | 15.65 | 35.06 |  |
| 1 | 2 | 15 | 303.9 | 7.02 | 17.88 |  |  | 0 | 2 | 16 | 807.24 | 14.12 | 26.83 |  |
| 0 | 3 | 15 | 1030.71 | 13.36 | 33.94 |  |  | 2 | 2 | 16 | 84.78 | 9.85 | 10.87 |  |
| 2 | 3 | 15 | 359.74 | 7.15 | 19.04 |  |  | 1 | 3 | 16 | 133.71 | 7.42 | 13.56 |  |
| 1 | 4 | 15 | 357.22 | 7.54 | 19.65 |  |  | 3 | 3 | 16 | 573.08 | 12.59 | 24.65 |  |
| 3 | 4 | 15 | 42.19 | 6.34 | 7.7 |  |  | 0 | 4 | 16 | 2110.6 | 23.24 | 48.01 |  |
| 0 | 5 | 15 | 126.37 | 9.93 | 11.63 |  |  | 2 | 4 | 16 | 153.24 | 7.47 | 13.38 |  |
| 2 | 5 | 15 | 264.46 | 7.31 | 17.92 |  |  | 4 | 4 | 16 | 1594.36 | 18.34 | 41 |  |
| 4 | 5 | 15 | 867.9 | 9.44 | 30.64 |  |  | 1 | 5 | 16 | 245.49 | 9.99 | 15.36 |  |
| 1 | 6 | 15 | 466.87 | 8.5 | 20.93 |  |  | 3 | 5 | 16 | 139.54 | 7.42 | 12.7 |  |
| 3 | 6 | 15 | 614.55 | 9.37 | 25.96 |  |  | 5 | 5 | 16 | 153.71 | 10.7 | 12.55 |  |
| 5 | 6 | 15 | 61.55 | 6.17 | 8.76 |  |  | 0 | 6 | 16 | 234.97 | 10.7 | 15.31 |  |
| 0 | 7 | 15 | 325.72 | 10.7 | 19.74 |  |  | 2 | 6 | 16 | 292.95 | 7.66 | 17.83 |  |
| 2 | 7 | 15 | 315.86 | 7.54 | 16.97 |  |  | 6 | 6 | 16 | 371.36 | 13.69 | 19.77 |  |
| 4 | 7 | 15 | 149.04 | 6.61 | 12.49 |  |  | 1 | 7 | 16 | 313.31 | 8.23 | 17.08 |  |
| 6 | 7 | 15 | 317.51 | 10.71 | 18.07 |  |  | 3 | 7 | 16 | 257.78 | 8.36 | 15.89 |  |

| h | k | l | Fcal^2 | Fobs^2 | (Fobs^2) | |  | h | k | l | Fcal^2 | Fobs^2 | (Fobs^2) | |
| --- | --- | --- | --- | --- | --- | --- | --- | --- | --- | --- | --- | --- | --- | --- |
|  |  |  |  |  |  |  |  |  |  |  |  |  |  |  |
| 5 | 7 | 16 | 108.36 | 8.57 | 8.39 |  |  | 4 | 7 | 17 | 43.04 | 7.57 | 5.61 |  |
| 7 | 7 | 16 | 131.91 | 12.59 | 9.48 |  |  | 6 | 7 | 17 | 148.36 | 9.7 | 11.27 |  |
| 0 | 8 | 16 | 3477.82 | 31.65 | 57.28 |  |  | 1 | 8 | 17 | 339.53 | 9.44 | 17.54 |  |
| 2 | 8 | 16 | 374.94 | 8.65 | 20.33 |  |  | 3 | 8 | 17 | 189.7 | 8.36 | 13.56 |  |
| 4 | 8 | 16 | 786.32 | 15.28 | 28.36 |  |  | 5 | 8 | 17 | 124.7 | 10.39 | 10.47 |  |
| 6 | 8 | 16 | 117.67 | 8.62 | 10.45 |  |  | 7 | 8 | 17 | 127.04 | 10.49 | 8.66 |  |
| 8 | 8 | 16 | 1342.21 | 20.92 | 34.73 |  |  | 0 | 9 | 17 | 117.81 | 11.83 | 10.19 |  |
| 1 | 9 | 16 | 278.14 | 8.25 | 17.26 |  |  | 2 | 9 | 17 | 141.72 | 8.62 | 12.16 |  |
| 3 | 9 | 16 | 111.14 | 7.8 | 11.2 |  |  | 4 | 9 | 17 | 38.21 | 8.74 | 5.49 |  |
| 5 | 9 | 16 | 300.59 | 9.42 | 18.21 |  |  | 6 | 9 | 17 | 83.76 | 8.77 | 10.46 |  |
| 7 | 9 | 16 | 188.59 | 10.38 | 14.43 |  |  | 8 | 9 | 17 | 56.59 | 9.02 | 8.32 |  |
| 0 | 10 | 16 | 97.41 | 11.46 | 9.03 |  |  | 1 | 10 | 17 | 180.58 | 9.04 | 13.38 |  |
| 2 | 10 | 16 | 158.91 | 9.25 | 12.22 |  |  | 5 | 10 | 17 | 49.34 | 9.31 | 5.95 |  |
| 4 | 10 | 16 | 145.75 | 9.04 | 11.55 |  |  | 7 | 10 | 17 | 48.81 | 8.98 | 6.64 |  |
| 8 | 10 | 16 | 105.96 | 12.15 | 10.43 |  |  | 9 | 10 | 17 | 61.6 | 17.95 | 6.04 |  |
| 10 | 10 | 16 | 84.21 | 17.08 | 8.83 |  |  | 2 | 11 | 17 | 63.79 | 8.5 | 7.46 |  |
| 1 | 11 | 16 | 181.64 | 8.77 | 12.9 |  |  | 4 | 11 | 17 | 144.05 | 10.16 | 10.26 |  |
| 5 | 11 | 16 | 89.89 | 7.97 | 7.73 |  |  | 8 | 11 | 17 | 122.86 | 16.64 | 7.79 |  |
| 7 | 11 | 16 | 119.47 | 11.12 | 10.16 |  |  | 10 | 11 | 17 | 126.79 | 42.01 | 6.82 |  |
| 9 | 11 | 16 | 54.21 | 13.66 | 5.92 |  |  | 3 | 12 | 17 | 92.5 | 9.73 | 10.39 |  |
| 0 | 12 | 16 | 332.85 | 14.12 | 18.15 |  |  | 5 | 12 | 17 | 43.73 | 15.65 | 5.27 |  |
| 2 | 12 | 16 | 25.15 | 11.46 | 4.2 |  |  | 0 | 13 | 17 | 57.78 | 17.08 | 5.08 |  |
| 4 | 12 | 16 | 746.15 | 24.99 | 25.68 |  |  | 2 | 13 | 17 | 46.85 | 12.54 | 7.4 |  |
| 6 | 12 | 16 | 156.84 | 10.91 | 11.79 |  |  | 4 | 13 | 17 | 85.75 | 17.31 | 5.94 |  |
| 8 | 12 | 16 | 299 | 18.27 | 16.88 |  |  | 5 | 14 | 17 | 76.34 | 26.62 | 7.63 |  |
| 1 | 13 | 16 | 43.06 | 9.04 | 4.79 |  |  | 7 | 14 | 17 | 87.5 | 22.16 | 6.75 |  |
| 3 | 13 | 16 | 32.95 | 8.62 | 6.34 |  |  | 1 | 1 | 18 | 349.16 | 13.76 | 20.42 |  |
| 5 | 13 | 16 | 142.51 | 13.5 | 11.66 |  |  | 0 | 2 | 18 | 200.12 | 12.59 | 15.39 |  |
| 7 | 13 | 16 | 81.89 | 15.83 | 7.39 |  |  | 2 | 2 | 18 | 1067.88 | 17.18 | 31.81 |  |
| 0 | 14 | 16 | 63.59 | 16.21 | 8.27 |  |  | 1 | 3 | 18 | 140.8 | 8.77 | 12.36 |  |
| 2 | 14 | 16 | 32.15 | 15.23 | 5.05 |  |  | 3 | 3 | 18 | 188.93 | 12.23 | 14.24 |  |
| 4 | 14 | 16 | 52.32 | 21.69 | 6.24 |  |  | 0 | 4 | 18 | 176.57 | 12.59 | 14.16 |  |
| 6 | 14 | 16 | 46.16 | 20.92 | 5.77 |  |  | 2 | 4 | 18 | 165.49 | 10.31 | 13.04 |  |
| 8 | 16 | 16 | 230.08 | 63.6 | 10.52 |  |  | 4 | 4 | 18 | 130.99 | 12.59 | 12.32 |  |
| 0 | 1 | 17 | 49.43 | 10.3 | 7.69 |  |  | 1 | 5 | 18 | 142.84 | 8.9 | 11.38 |  |
| 1 | 2 | 17 | 268.92 | 8.11 | 16.44 |  |  | 3 | 5 | 18 | 146.67 | 8.5 | 11.56 |  |
| 0 | 3 | 17 | 320.6 | 11.83 | 18.97 |  |  | 5 | 5 | 18 | 237.65 | 12.23 | 14.44 |  |
| 2 | 3 | 17 | 119.67 | 8.11 | 10.65 |  |  | 2 | 6 | 18 | 1164.53 | 13.48 | 33.42 |  |
| 1 | 4 | 17 | 52.66 | 7.93 | 8.32 |  |  | 4 | 6 | 18 | 153.04 | 8.77 | 12 |  |
| 3 | 4 | 17 | 36.84 | 7.96 | 7.75 |  |  | 6 | 6 | 18 | 600.75 | 15.99 | 22.65 |  |
| 0 | 5 | 17 | 546.27 | 14.12 | 22.36 |  |  | 1 | 7 | 18 | 121.17 | 8.77 | 11.78 |  |
| 2 | 5 | 17 | 134.21 | 7.82 | 10.71 |  |  | 3 | 7 | 18 | 53.29 | 8.36 | 6.04 |  |
| 4 | 5 | 17 | 360.79 | 9.31 | 17.26 |  |  | 5 | 7 | 18 | 64.16 | 8.02 | 8.45 |  |
| 1 | 6 | 17 | 308.21 | 9.54 | 18.8 |  |  | 7 | 7 | 18 | 132.87 | 14.12 | 9.09 |  |
| 3 | 6 | 17 | 355.48 | 9.19 | 19.04 |  |  | 0 | 8 | 18 | 290.94 | 23.78 | 15.86 |  |
| 5 | 6 | 17 | 73.43 | 7.12 | 8.48 |  |  | 2 | 8 | 18 | 73.05 | 8.77 | 7.86 |  |
| 0 | 7 | 17 | 356.35 | 13.36 | 19.03 |  |  | 4 | 8 | 18 | 58.13 | 7.72 | 6.05 |  |
| 2 | 7 | 17 | 154.31 | 9.4 | 12.09 |  |  | 6 | 8 | 18 | 148.34 | 12.2 | 8.77 |  |

| h | k | l | Fcal^2 | Fobs^2 | (Fobs^2) | |  | h | k | l | Fcal^2 | Fobs^2 | (Fobs^2) | |
| --- | --- | --- | --- | --- | --- | --- | --- | --- | --- | --- | --- | --- | --- | --- |
|  |  |  |  |  |  |  |  |  |  |  |  |  |  |  |
| 1 | 9 | 18 | 73.38 | 9.5 | 8.92 |  |  | 4 | 4 | 20 | 901.04 | 17.53 | 27.48 |  |
| 3 | 9 | 18 | 45.52 | 9.19 | 7.13 |  |  | 1 | 5 | 20 | 62.71 | 10.64 | 7.31 |  |
| 5 | 9 | 18 | 34.94 | 14.46 | 5.9 |  |  | 3 | 5 | 20 | 130.31 | 10.66 | 10.89 |  |
| 7 | 9 | 18 | 45.51 | 17.85 | 6.36 |  |  | 5 | 5 | 20 | 170.14 | 18.34 | 12.04 |  |
| 0 | 10 | 18 | 241.98 | 13.36 | 13.52 |  |  | 0 | 6 | 20 | 60.19 | 14.52 | 7.45 |  |
| 2 | 10 | 18 | 492.13 | 11.61 | 22.03 |  |  | 2 | 6 | 20 | 69.29 | 11.77 | 7.91 |  |
| 4 | 10 | 18 | 40.43 | 9.89 | 6.49 |  |  | 4 | 6 | 20 | 108.44 | 11.59 | 10.29 |  |
| 6 | 10 | 18 | 313.89 | 20.28 | 17.69 |  |  | 6 | 6 | 20 | 66.63 | 17.59 | 2.29 |  |
| 10 | 10 | 18 | 262.49 | 33.76 | 14.9 |  |  | 1 | 7 | 20 | 32.38 | 16.1 | 3.37 |  |
| 1 | 11 | 18 | 32.04 | 13.36 | 5.9 |  |  | 3 | 7 | 20 | 105.58 | 13.74 | 8.7 |  |
| 3 | 11 | 18 | 90.93 | 13.03 | 10.97 |  |  | 5 | 7 | 20 | 60.35 | 14.7 | 6.37 |  |
| 5 | 11 | 18 | 46.26 | 13.68 | 7.27 |  |  | 0 | 8 | 20 | 340.09 | 20.24 | 17.61 |  |
| 7 | 11 | 18 | 50.9 | 15.77 | 7.86 |  |  | 4 | 8 | 20 | 238.09 | 16.94 | 15.62 |  |
| 2 | 12 | 18 | 87.21 | 16.47 | 6.77 |  |  | 8 | 8 | 20 | 92.61 | 33.5 | 10.52 |  |
| 4 | 12 | 18 | 49.33 | 21.4 | 5.69 |  |  | 3 | 9 | 20 | 50.55 | 19.59 | 5.57 |  |
| 3 | 13 | 18 | 82.49 | 18.77 | 8.42 |  |  | 1 | 11 | 20 | 65.35 | 32.42 | 6.99 |  |
| 2 | 14 | 18 | 172.37 | 45.77 | 13.12 |  |  | 2 | 12 | 20 | 103.98 | 45.9 | 6.42 |  |
| 6 | 14 | 18 | 163.09 | 30.8 | 10.48 |  |  | 4 | 12 | 20 | 165.18 | 30.83 | 12.23 |  |
| 0 | 1 | 19 | 44.5 | 11.83 | 7.58 |  |  | 0 | 1 | 21 | 71.27 | 16.05 | 8.39 |  |
| 1 | 2 | 19 | 56.18 | 8.62 | 7.48 |  |  | 1 | 2 | 21 | 62.05 | 10.53 | 7.82 |  |
| 2 | 3 | 19 | 119.76 | 8.62 | 11.14 |  |  | 2 | 3 | 21 | 39.23 | 11.22 | 5.49 |  |
| 1 | 4 | 19 | 200.49 | 9.31 | 13.94 |  |  | 1 | 4 | 21 | 52.86 | 11.61 | 5.31 |  |
| 3 | 4 | 19 | 229.01 | 9.44 | 14.07 |  |  | 3 | 4 | 21 | 53.78 | 17.53 | 7.94 |  |
| 0 | 5 | 19 | 97.52 | 12.99 | 8.13 |  |  | 2 | 5 | 21 | 69.42 | 11.48 | 7.56 |  |
| 2 | 5 | 19 | 167.79 | 9.7 | 13.68 |  |  | 4 | 5 | 21 | 50.77 | 11.75 | 6.65 |  |
| 4 | 5 | 19 | 110.93 | 9.53 | 6.13 |  |  | 3 | 6 | 21 | 68.14 | 14.13 | 7.22 |  |
| 3 | 6 | 19 | 65.04 | 8.9 | 8.4 |  |  | 4 | 7 | 21 | 68.37 | 18.41 | 7.9 |  |
| 5 | 6 | 19 | 60.43 | 9.04 | 6.05 |  |  | 1 | 8 | 21 | 54.21 | 24.06 | 5.39 |  |
| 0 | 7 | 19 | 123.32 | 13.69 | 11.1 |  |  | 0 | 0 | 22 | 272.07 | 37.83 | 15.48 |  |
| 2 | 7 | 19 | 108.96 | 10.16 | 9.9 |  |  | 2 | 2 | 22 | 263.45 | 32.75 | 15.57 |  |
| 4 | 7 | 19 | 49.1 | 9.85 | 6.04 |  |  | 1 | 3 | 22 | 48.1 | 21.77 | 6.42 |  |
| 6 | 7 | 19 | 56.18 | 16.42 | 5.58 |  |  | 3 | 3 | 22 | 74.1 | 34.58 | 6.32 |  |
| 1 | 8 | 19 | 149.32 | 10.53 | 10.62 |  |  | 2 | 4 | 22 | 55.26 | 24.06 | 6.36 |  |
| 5 | 8 | 19 | 43.35 | 11.57 | 5.3 |  |  | 4 | 4 | 22 | 63.54 | 30.26 | 7.06 |  |
| 7 | 8 | 19 | 45.09 | 11.96 | 4.45 |  |  | 0 | 6 | 22 | 70.32 | 20.15 | 6.81 |  |
| 0 | 9 | 19 | 37.67 | 14.12 | 5.97 |  |  | 2 | 6 | 22 | 195.4 | 27.92 | 14.17 |  |
| 4 | 9 | 19 | 62.81 | 13.31 | 7.69 |  |  | 6 | 6 | 22 | 136.5 | 61.6 | 10 |  |
| 6 | 9 | 19 | 47.43 | 19.48 | 6.09 |  |  | 3 | 7 | 22 | 113.88 | 51.53 | 4.78 |  |
| 1 | 10 | 19 | 54.01 | 10.53 | 8.28 |  |  |  |  |  |  |  |  |  |
| 3 | 10 | 19 | 62.91 | 13.53 | 7.47 |  |  |  |  |  |  |  |  |  |
| 4 | 11 | 19 | 74.26 | 25.08 | 7.19 |  |  |  |  |  |  |  |  |  |
| 0 | 0 | 20 | 494.26 | 31.34 | 21.89 |  |  |  |  |  |  |  |  |  |
| 1 | 1 | 20 | 72.56 | 13.36 | 4.85 |  |  |  |  |  |  |  |  |  |
| 0 | 2 | 20 | 28.72 | 12.59 | 4.83 |  |  |  |  |  |  |  |  |  |
| 2 | 2 | 20 | 110.42 | 14.12 | 10.75 |  |  |  |  |  |  |  |  |  |
| 1 | 3 | 20 | 96.13 | 9.42 | 8.83 |  |  |  |  |  |  |  |  |  |
| 0 | 4 | 20 | 466.24 | 17.53 | 20.97 |  |  |  |  |  |  |  |  |  |
| 2 | 4 | 20 | 62.71 | 11.68 | 8.81 |  |  |  |  |  |  |  |  |  |

Crystal 3

| h | k | l | Fcal^2 | Fobs^2 | σ(Fobs^2) | |  | h | k | l | Fcal^2 | Fobs^2 | σ(Fobs^2) | |
| --- | --- | --- | --- | --- | --- | --- | --- | --- | --- | --- | --- | --- | --- | --- |
|  |  |  |  |  |  |  |  |  |  |  |  |  |  |  |
| 0 | 2 | 2 | 21273.81 | 182.11 | 129.08 |  |  | 5 | 6 | 7 | 3006.05 | 12.44 | 54.12 |  |
| 0 | 1 | 3 | 14747.86 | 127.49 | 114.95 |  |  | 0 | 7 | 7 | 5294.62 | 50.93 | 72.68 |  |
| 1 | 2 | 3 | 2550.63 | 14.18 | 48.03 |  |  | 2 | 7 | 7 | 2809.58 | 16.61 | 51.82 |  |
| 0 | 3 | 3 | 4141.19 | 36.27 | 57.2 |  |  | 4 | 7 | 7 | 3928.11 | 21.97 | 60.87 |  |
| 2 | 3 | 3 | 30823.29 | 189.42 | 164.69 |  |  | 6 | 7 | 7 | 4182.02 | 22.9 | 63.99 |  |
| 0 | 0 | 4 | 0.27 | 5.79 | 0.51 |  |  | 0 | 0 | 8 | 45010.64 | 669.01 | 203.41 |  |
| 1 | 1 | 4 | 13022.49 | 75.44 | 108.14 |  |  | 1 | 1 | 8 | 893.01 | 7.37 | 29.28 |  |
| 0 | 2 | 4 | 2432.85 | 16.23 | 48.18 |  |  | 0 | 2 | 8 | 570.28 | 4.77 | 24.09 |  |
| 2 | 2 | 4 | 16619.82 | 169.46 | 125.3 |  |  | 2 | 2 | 8 | 8120.29 | 46.07 | 86.68 |  |
| 1 | 3 | 4 | 27116.7 | 141.24 | 155.28 |  |  | 1 | 3 | 8 | 4503.99 | 18.04 | 64.62 |  |
| 3 | 3 | 4 | 31664.35 | 162.06 | 169.01 |  |  | 3 | 3 | 8 | 2176.78 | 13.02 | 44.72 |  |
| 2 | 4 | 4 | 25868.14 | 284.19 | 150 |  |  | 0 | 4 | 8 | 26549.71 | 176.1 | 162.51 |  |
| 0 | 1 | 5 | 1575.93 | 14.98 | 37.54 |  |  | 2 | 4 | 8 | 6522.56 | 24.82 | 77.51 |  |
| 1 | 2 | 5 | 2920.2 | 12.47 | 49.72 |  |  | 4 | 4 | 8 | 18153.89 | 107.68 | 133.02 |  |
| 0 | 3 | 5 | 872.98 | 7.09 | 28.55 |  |  | 1 | 5 | 8 | 7306.4 | 29.46 | 83.78 |  |
| 2 | 3 | 5 | 14719.51 | 77.61 | 116.81 |  |  | 3 | 5 | 8 | 2058.71 | 8.73 | 45.07 |  |
| 1 | 4 | 5 | 6809.48 | 27.54 | 81.83 |  |  | 5 | 5 | 8 | 1448.16 | 9.34 | 34.25 |  |
| 0 | 5 | 5 | 11218.35 | 96.07 | 98.65 |  |  | 0 | 6 | 8 | 7673.34 | 42.56 | 84.19 |  |
| 2 | 5 | 5 | 344.29 | 3.5 | 19.86 |  |  | 2 | 6 | 8 | 965.17 | 4.86 | 32.27 |  |
| 4 | 5 | 5 | 12182.66 | 64.34 | 105.28 |  |  | 4 | 6 | 8 | 929.2 | 5.14 | 31.12 |  |
| 0 | 0 | 6 | 1211.22 | 29.32 | 34.57 |  |  | 6 | 6 | 8 | 1945.81 | 11.87 | 43.91 |  |
| 1 | 1 | 6 | 4836.75 | 35.98 | 66.14 |  |  | 1 | 7 | 8 | 3280.33 | 13.4 | 55.15 |  |
| 0 | 2 | 6 | 5421.71 | 31.92 | 70.32 |  |  | 3 | 7 | 8 | 4608.8 | 17.54 | 67.33 |  |
| 2 | 2 | 6 | 42306.02 | 242.07 | 195.47 |  |  | 5 | 7 | 8 | 3646.69 | 14.5 | 60.1 |  |
| 3 | 3 | 6 | 6953.53 | 42.24 | 80.66 |  |  | 7 | 7 | 8 | 2846.59 | 15.82 | 52.79 |  |
| 2 | 4 | 6 | 5588.54 | 22.01 | 73.45 |  |  | 0 | 8 | 8 | 24916.5 | 212.2 | 153.02 |  |
| 4 | 4 | 6 | 4638.89 | 26.33 | 64.68 |  |  | 2 | 8 | 8 | 4505.17 | 24.09 | 66.67 |  |
| 1 | 5 | 6 | 8882.57 | 33.55 | 89.36 |  |  | 4 | 8 | 8 | 16338.82 | 130.58 | 130.06 |  |
| 3 | 5 | 6 | 8781.96 | 32.64 | 89.16 |  |  | 6 | 8 | 8 | 3216.15 | 17.45 | 56.63 |  |
| 5 | 5 | 6 | 10865.12 | 57.22 | 101.05 |  |  | 8 | 8 | 8 | 7759.5 | 94.55 | 89.89 |  |
| 0 | 6 | 6 | 7147.66 | 64.05 | 78.98 |  |  | 0 | 1 | 9 | 8214.86 | 59.88 | 87.62 |  |
| 2 | 6 | 6 | 28209.3 | 193.79 | 167.7 |  |  | 1 | 2 | 9 | 6129.37 | 27.44 | 76.35 |  |
| 4 | 6 | 6 | 9027.41 | 47.46 | 92.7 |  |  | 0 | 3 | 9 | 2252.27 | 13.91 | 48.01 |  |
| 6 | 6 | 6 | 44349.95 | 1031.18 | 208.2 |  |  | 2 | 3 | 9 | 1591.88 | 7.02 | 38.94 |  |
| 0 | 1 | 7 | 5458.39 | 101.47 | 71.78 |  |  | 1 | 4 | 9 | 1554.73 | 6.99 | 38.24 |  |
| 1 | 2 | 7 | 6079.87 | 25.35 | 75.37 |  |  | 3 | 4 | 9 | 4518.2 | 17.07 | 65.91 |  |
| 0 | 3 | 7 | 1584.76 | 10.91 | 41.54 |  |  | 0 | 5 | 9 | 1320.33 | 9.26 | 34.65 |  |
| 2 | 3 | 7 | 4218.53 | 16.87 | 61.31 |  |  | 2 | 5 | 9 | 3428.51 | 13.89 | 58.28 |  |
| 1 | 4 | 7 | 5039.66 | 20.26 | 68.63 |  |  | 4 | 5 | 9 | 1843.19 | 7.95 | 42.71 |  |
| 3 | 4 | 7 | 2908.78 | 12.48 | 51.25 |  |  | 1 | 6 | 9 | 2348.6 | 9.99 | 47.13 |  |
| 0 | 5 | 7 | 2320.41 | 15.67 | 48.49 |  |  | 3 | 6 | 9 | 1666.81 | 7.3 | 40.72 |  |
| 2 | 5 | 7 | 1752.38 | 9.54 | 40.48 |  |  | 5 | 6 | 9 | 805.95 | 4.29 | 26.99 |  |
| 4 | 5 | 7 | 4874.67 | 19.09 | 67.94 |  |  | 0 | 7 | 9 | 3780.46 | 24.89 | 58.55 |  |
| 1 | 6 | 7 | 3225.02 | 13.3 | 56.6 |  |  | 2 | 7 | 9 | 4136.25 | 16 | 63.15 |  |
| 3 | 6 | 7 | 5139.37 | 20.61 | 71.75 |  |  | 4 | 7 | 9 | 735.26 | 6.84 | 27.96 |  |

| h | k | l | Fcal^2 | Fobs^2 | (Fobs^2) | |  | h | k | l | Fcal^2 | Fobs^2 | (Fobs^2) | |
| --- | --- | --- | --- | --- | --- | --- | --- | --- | --- | --- | --- | --- | --- | --- |
|  |  |  |  |  |  |  |  |  |  |  |  |  |  |  |
| 6 | 7 | 9 | 1326.69 | 6.12 | 36.12 |  |  | 0 | 3 | 11 | 3204.74 | 23.19 | 56.99 |  |
| 1 | 8 | 9 | 1809.69 | 81.79 | 42.43 |  |  | 2 | 3 | 11 | 961.17 | 4.88 | 30.65 |  |
| 3 | 8 | 9 | 1612.99 | 6.89 | 41 |  |  | 1 | 4 | 11 | 143.69 | 3.89 | 12.23 |  |
| 5 | 8 | 9 | 2088.95 | 8.63 | 46.49 |  |  | 3 | 4 | 11 | 3048.66 | 46.96 | 55.5 |  |
| 7 | 8 | 9 | 809.93 | 5.01 | 29.22 |  |  | 0 | 5 | 11 | 1923.95 | 20.02 | 43.54 |  |
| 0 | 9 | 9 | 2726.33 | 22.76 | 50.38 |  |  | 2 | 5 | 11 | 2665.12 | 11.06 | 51.34 |  |
| 2 | 9 | 9 | 2075.16 | 11.97 | 47.27 |  |  | 4 | 5 | 11 | 1666.77 | 7.13 | 40.54 |  |
| 4 | 9 | 9 | 425.65 | 4.22 | 18.85 |  |  | 1 | 6 | 11 | 1773.21 | 7.57 | 43.46 |  |
| 6 | 9 | 9 | 1706.66 | 10.63 | 42.53 |  |  | 3 | 6 | 11 | 2065.56 | 8.53 | 44.61 |  |
| 8 | 9 | 9 | 468.88 | 4.64 | 22.99 |  |  | 5 | 6 | 11 | 603.89 | 3.91 | 24.97 |  |
| 0 | 0 | 10 | 27074.25 | 454.5 | 158.04 |  |  | 0 | 7 | 11 | 1523.51 | 10.32 | 41.02 |  |
| 1 | 1 | 10 | 552.16 | 6.37 | 22.89 |  |  | 2 | 7 | 11 | 1164.45 | 5.59 | 32.53 |  |
| 0 | 2 | 10 | 697.46 | 6.27 | 26.77 |  |  | 4 | 7 | 11 | 2609.27 | 10.96 | 52.4 |  |
| 2 | 2 | 10 | 20583.1 | 119.76 | 143.08 |  |  | 6 | 7 | 11 | 133.39 | 2.25 | 12.09 |  |
| 1 | 3 | 10 | 2702.39 | 11.11 | 51.17 |  |  | 1 | 8 | 11 | 1506.28 | 6.89 | 38.57 |  |
| 3 | 3 | 10 | 8439.39 | 47.74 | 89.01 |  |  | 3 | 8 | 11 | 46.54 | 2.33 | 5.67 |  |
| 0 | 4 | 10 | 19.33 | 2.18 | 5.61 |  |  | 5 | 8 | 11 | 15.11 | 2.23 | 4.25 |  |
| 2 | 4 | 10 | 4628.74 | 17.36 | 65.47 |  |  | 7 | 8 | 11 | 135.13 | 2.83 | 11.83 |  |
| 4 | 4 | 10 | 4032.52 | 21.53 | 65.42 |  |  | 0 | 9 | 11 | 727.27 | 6.13 | 28.33 |  |
| 1 | 5 | 10 | 2640.22 | 10.89 | 50.39 |  |  | 2 | 9 | 11 | 646.05 | 3.85 | 26.15 |  |
| 3 | 5 | 10 | 1716.2 | 7.33 | 40.02 |  |  | 4 | 9 | 11 | 696.13 | 5.31 | 26.03 |  |
| 5 | 5 | 10 | 612.85 | 4.89 | 22.92 |  |  | 6 | 9 | 11 | 473.59 | 3.42 | 22.91 |  |
| 0 | 6 | 10 | 1807.61 | 11.72 | 43.48 |  |  | 8 | 9 | 11 | 732.01 | 4.63 | 28.91 |  |
| 2 | 6 | 10 | 18588.94 | 70.81 | 135.25 |  |  | 1 | 10 | 11 | 148.45 | 2.38 | 13.31 |  |
| 4 | 6 | 10 | 1014.28 | 4.93 | 31.06 |  |  | 3 | 10 | 11 | 457.45 | 4.35 | 22.14 |  |
| 6 | 6 | 10 | 5401.9 | 27.67 | 74.51 |  |  | 5 | 10 | 11 | 310.45 | 2.89 | 18.65 |  |
| 1 | 7 | 10 | 2386.79 | 10.16 | 48.34 |  |  | 7 | 10 | 11 | 405.27 | 3.37 | 21.74 |  |
| 3 | 7 | 10 | 927.08 | 4.72 | 32.05 |  |  | 9 | 10 | 11 | 326.37 | 3.42 | 18.99 |  |
| 5 | 7 | 10 | 1443.37 | 6.86 | 39.33 |  |  | 2 | 11 | 11 | 685.44 | 6 | 25.67 |  |
| 7 | 7 | 10 | 663.85 | 5.46 | 26.41 |  |  | 4 | 11 | 11 | 24.26 | 3 | 5.96 |  |
| 0 | 8 | 10 | 2167.49 | 13.89 | 47.74 |  |  | 6 | 11 | 11 | 912.21 | 7.5 | 32.34 |  |
| 2 | 8 | 10 | 2354.33 | 9.44 | 48.65 |  |  | 8 | 11 | 11 | 811.38 | 7.5 | 30.58 |  |
| 4 | 8 | 10 | 394.96 | 2.88 | 19.34 |  |  | 10 | 11 | 11 | 176.02 | 4.5 | 13.83 |  |
| 6 | 8 | 10 | 1104.81 | 5.4 | 34.43 |  |  | 0 | 0 | 12 | 13953.87 | 328.72 | 121.49 |  |
| 8 | 8 | 10 | 677.8 | 5.59 | 27.53 |  |  | 0 | 2 | 12 | 2526.56 | 19.09 | 50.36 |  |
| 1 | 9 | 10 | 1158.54 | 6.1 | 33.11 |  |  | 2 | 2 | 12 | 1835.72 | 13.36 | 42.91 |  |
| 3 | 9 | 10 | 876.15 | 4.68 | 28.84 |  |  | 1 | 3 | 12 | 1483.13 | 9.75 | 37.99 |  |
| 5 | 9 | 10 | 1016.55 | 6.12 | 32.86 |  |  | 3 | 3 | 12 | 1006.82 | 6.76 | 31.58 |  |
| 7 | 9 | 10 | 480.14 | 3.93 | 23.3 |  |  | 0 | 4 | 12 | 10667.47 | 67.66 | 103.54 |  |
| 9 | 9 | 10 | 403.97 | 5.04 | 20.69 |  |  | 2 | 4 | 12 | 713.14 | 3.81 | 26.25 |  |
| 0 | 10 | 10 | 273.66 | 5.4 | 16.13 |  |  | 4 | 4 | 12 | 14020.67 | 77.83 | 119.74 |  |
| 2 | 10 | 10 | 5470.28 | 31.25 | 74.93 |  |  | 1 | 5 | 12 | 1961.5 | 8.34 | 45.14 |  |
| 4 | 10 | 10 | 1113.98 | 7.77 | 35.2 |  |  | 3 | 5 | 12 | 1714.51 | 8.59 | 41.17 |  |
| 6 | 10 | 10 | 5253.81 | 28.21 | 76.03 |  |  | 5 | 5 | 12 | 1607.63 | 11.73 | 41.12 |  |
| 8 | 10 | 10 | 437.64 | 4.89 | 22.51 |  |  | 0 | 6 | 12 | 345.79 | 3.95 | 18.85 |  |
| 10 | 10 | 10 | 2722.32 | 31.36 | 53.94 |  |  | 2 | 6 | 12 | 2218.78 | 9.3 | 46.99 |  |
| 0 | 1 | 11 | 3965.74 | 29.46 | 62.34 |  |  | 4 | 6 | 12 | 2610.97 | 11.23 | 52.59 |  |
| 1 | 2 | 11 | 3010.38 | 14.75 | 54.65 |  |  | 6 | 6 | 12 | 49.62 | 2.73 | 7.41 |  |

| h | k | l | Fcal^2 | Fobs^2 | (Fobs^2) | |  | h | k | l | Fcal^2 | Fobs^2 | (Fobs^2) | |
| --- | --- | --- | --- | --- | --- | --- | --- | --- | --- | --- | --- | --- | --- | --- |
|  |  |  |  |  |  |  |  |  |  |  |  |  |  |  |
| 1 | 7 | 12 | 156.31 | 2.26 | 12.01 |  |  | 6 | 7 | 13 | 354.74 | 3.12 | 20.09 |  |
| 3 | 7 | 12 | 1048.99 | 5.3 | 32.43 |  |  | 1 | 8 | 13 | 852.67 | 4.72 | 30.53 |  |
| 5 | 7 | 12 | 624.04 | 4.14 | 25.37 |  |  | 3 | 8 | 13 | 29.82 | 2.23 | 6.14 |  |
| 7 | 7 | 12 | 536.38 | 5.04 | 23.61 |  |  | 5 | 8 | 13 | 22.34 | 2.21 | 5.08 |  |
| 0 | 8 | 12 | 4878.65 | 29.46 | 72.51 |  |  | 7 | 8 | 13 | 472.21 | 4.41 | 22.59 |  |
| 2 | 8 | 12 | 380.07 | 3.22 | 20.26 |  |  | 0 | 9 | 13 | 733.01 | 6.68 | 26.7 |  |
| 4 | 8 | 12 | 3257.76 | 13.55 | 57.8 |  |  | 2 | 9 | 13 | 56.38 | 2.52 | 8.36 |  |
| 6 | 8 | 12 | 91.04 | 2.21 | 9.72 |  |  | 4 | 9 | 13 | 565.84 | 4.05 | 23.99 |  |
| 8 | 8 | 12 | 3100.01 | 18.8 | 58.03 |  |  | 6 | 9 | 13 | 704.59 | 5.36 | 27.69 |  |
| 1 | 9 | 12 | 323.4 | 3.53 | 18.31 |  |  | 8 | 9 | 13 | 358.07 | 3.56 | 19.51 |  |
| 3 | 9 | 12 | 924.3 | 4.92 | 32.25 |  |  | 1 | 10 | 13 | 349.97 | 3.18 | 19.09 |  |
| 5 | 9 | 12 | 471.14 | 4.11 | 22.97 |  |  | 3 | 10 | 13 | 733.69 | 4.68 | 27.84 |  |
| 7 | 9 | 12 | 488.6 | 5.67 | 23.91 |  |  | 5 | 10 | 13 | 561.39 | 4.14 | 24.48 |  |
| 9 | 9 | 12 | 358.32 | 4.77 | 20.54 |  |  | 7 | 10 | 13 | 125.67 | 2.75 | 11.12 |  |
| 0 | 10 | 12 | 180.12 | 3.82 | 13.55 |  |  | 9 | 10 | 13 | 91.72 | 2.7 | 9.6 |  |
| 2 | 10 | 12 | 99.03 | 2.31 | 10.02 |  |  | 2 | 11 | 13 | 261.36 | 3.88 | 17.06 |  |
| 4 | 10 | 12 | 570.18 | 4.05 | 24.22 |  |  | 4 | 11 | 13 | 629.52 | 4.63 | 26.08 |  |
| 6 | 10 | 12 | 639.25 | 5.72 | 26.69 |  |  | 6 | 11 | 13 | 297.12 | 3.93 | 18 |  |
| 8 | 10 | 12 | 440.01 | 3.85 | 22.7 |  |  | 8 | 11 | 13 | 55.87 | 2.75 | 7.67 |  |
| 10 | 10 | 12 | 352.04 | 5.16 | 20.08 |  |  | 10 | 11 | 13 | 166.68 | 4.15 | 13.41 |  |
| 1 | 11 | 12 | 743.7 | 4.57 | 28.25 |  |  | 1 | 12 | 13 | 230.5 | 3.56 | 16.66 |  |
| 3 | 11 | 12 | 914.92 | 5.81 | 31.16 |  |  | 3 | 12 | 13 | 233.27 | 3.99 | 16.8 |  |
| 5 | 11 | 12 | 489.38 | 4 | 23.67 |  |  | 5 | 12 | 13 | 204.84 | 3.26 | 15.38 |  |
| 7 | 11 | 12 | 184.87 | 3.37 | 14.84 |  |  | 7 | 12 | 13 | 270.5 | 3.46 | 17.06 |  |
| 9 | 11 | 12 | 106.68 | 2.89 | 10.71 |  |  | 9 | 12 | 13 | 188.54 | 3.89 | 14.38 |  |
| 11 | 11 | 12 | 128.08 | 4.37 | 11.35 |  |  | 11 | 12 | 13 | 104.34 | 3.52 | 10.32 |  |
| 0 | 12 | 12 | 1845.89 | 20.83 | 45.78 |  |  | 0 | 13 | 13 | 153.14 | 5.79 | 12.38 |  |
| 2 | 12 | 12 | 876.57 | 8.32 | 32.3 |  |  | 2 | 13 | 13 | 88.36 | 3.68 | 10.57 |  |
| 4 | 12 | 12 | 2970.05 | 25.51 | 61.36 |  |  | 4 | 13 | 13 | 151.21 | 4.5 | 12.01 |  |
| 6 | 12 | 12 | 97.6 | 4.09 | 11.47 |  |  | 6 | 13 | 13 | 350.31 | 5.86 | 19.11 |  |
| 8 | 12 | 12 | 1340.5 | 11.57 | 38.42 |  |  | 8 | 13 | 13 | 58.04 | 4.37 | 7.28 |  |
| 10 | 12 | 12 | 132.89 | 4.5 | 11.5 |  |  | 10 | 13 | 13 | 84.58 | 4.5 | 9.75 |  |
| 12 | 12 | 12 | 1003.92 | 19.62 | 31.38 |  |  | 12 | 13 | 13 | 68.79 | 5.59 | 8.29 |  |
| 0 | 1 | 13 | 610.93 | 7.09 | 25.63 |  |  | 0 | 0 | 14 | 457.73 | 15.43 | 19.26 |  |
| 1 | 2 | 13 | 474.75 | 4.19 | 22.55 |  |  | 1 | 1 | 14 | 2382.65 | 20.31 | 46.94 |  |
| 0 | 3 | 13 | 696.77 | 10.22 | 28.23 |  |  | 0 | 2 | 14 | 1385.58 | 12.82 | 36.65 |  |
| 2 | 3 | 13 | 1434.91 | 8.01 | 38.81 |  |  | 2 | 2 | 14 | 7396.51 | 52.63 | 86.82 |  |
| 1 | 4 | 13 | 2039.04 | 10.1 | 45.24 |  |  | 1 | 3 | 14 | 1547.99 | 9.76 | 40.19 |  |
| 3 | 4 | 13 | 1370.35 | 7.4 | 37.87 |  |  | 3 | 3 | 14 | 243.52 | 3.95 | 16.64 |  |
| 0 | 5 | 13 | 30.14 | 2.31 | 4.34 |  |  | 0 | 4 | 14 | 1329.79 | 11.45 | 36.88 |  |
| 2 | 5 | 13 | 2982.06 | 18.67 | 56.48 |  |  | 2 | 4 | 14 | 785.24 | 4.86 | 28.83 |  |
| 4 | 5 | 13 | 949.25 | 8.88 | 30.78 |  |  | 4 | 4 | 14 | 996 | 7.5 | 31.2 |  |
| 1 | 6 | 13 | 868.15 | 4.72 | 28.95 |  |  | 1 | 5 | 14 | 86.17 | 2.92 | 9 |  |
| 3 | 6 | 13 | 438.08 | 3.22 | 20.32 |  |  | 3 | 5 | 14 | 327.87 | 2.7 | 18.22 |  |
| 5 | 6 | 13 | 43.31 | 1.93 | 6.43 |  |  | 5 | 5 | 14 | 2186.66 | 13.64 | 46.44 |  |
| 0 | 7 | 13 | 773.43 | 6.41 | 29.05 |  |  | 0 | 6 | 14 | 560.49 | 5.18 | 23.09 |  |
| 2 | 7 | 13 | 1275.27 | 6.12 | 36.24 |  |  | 2 | 6 | 14 | 4832.55 | 20.27 | 69.48 |  |
| 4 | 7 | 13 | 481.94 | 3.42 | 21.89 |  |  | 4 | 6 | 14 | 216.66 | 2.55 | 14.31 |  |

| h | k | l | Fcal^2 | Fobs^2 | (Fobs^2) | |  | h | k | l | Fcal^2 | Fobs^2 | (Fobs^2) | |
| --- | --- | --- | --- | --- | --- | --- | --- | --- | --- | --- | --- | --- | --- | --- |
|  |  |  |  |  |  |  |  |  |  |  |  |  |  |  |
| 6 | 6 | 14 | 2413.99 | 14.98 | 49.2 |  |  | 0 | 3 | 15 | 1426.02 | 12.68 | 38.34 |  |
| 1 | 7 | 14 | 650.64 | 4.04 | 26.24 |  |  | 2 | 3 | 15 | 491.1 | 5.48 | 21.48 |  |
| 3 | 7 | 14 | 164.79 | 2.96 | 13.51 |  |  | 1 | 4 | 15 | 519.93 | 5.01 | 22.38 |  |
| 5 | 7 | 14 | 206.05 | 2.55 | 13.96 |  |  | 3 | 4 | 15 | 75.07 | 2.31 | 8.65 |  |
| 7 | 7 | 14 | 716.22 | 6.53 | 27.09 |  |  | 0 | 5 | 15 | 165.36 | 3.82 | 12.64 |  |
| 0 | 8 | 14 | 575.1 | 5.73 | 23.7 |  |  | 2 | 5 | 15 | 381.85 | 3.55 | 20.38 |  |
| 2 | 8 | 14 | 659.91 | 4.27 | 25.21 |  |  | 4 | 5 | 15 | 1175.69 | 6.12 | 34.06 |  |
| 4 | 8 | 14 | 166.49 | 2.86 | 12.97 |  |  | 1 | 6 | 15 | 574.02 | 3.97 | 23.1 |  |
| 6 | 8 | 14 | 377.04 | 3.32 | 19.32 |  |  | 3 | 6 | 15 | 864.32 | 4.86 | 29.3 |  |
| 8 | 8 | 14 | 290.82 | 4.64 | 17.38 |  |  | 5 | 6 | 15 | 92.42 | 2.65 | 9.86 |  |
| 1 | 9 | 14 | 1112.91 | 5.93 | 32.66 |  |  | 0 | 7 | 15 | 458.02 | 5.04 | 22.1 |  |
| 3 | 9 | 14 | 314.89 | 3.28 | 17.63 |  |  | 2 | 7 | 15 | 424.81 | 3.28 | 19.4 |  |
| 5 | 9 | 14 | 90.28 | 2.46 | 9.29 |  |  | 4 | 7 | 15 | 206.37 | 3.23 | 14.09 |  |
| 7 | 9 | 14 | 361.29 | 4.28 | 19.09 |  |  | 6 | 7 | 15 | 445.52 | 4.64 | 20.73 |  |
| 9 | 9 | 14 | 411.56 | 5.46 | 20.53 |  |  | 1 | 8 | 15 | 687.53 | 4.6 | 25.37 |  |
| 0 | 10 | 14 | 652.85 | 6.41 | 26.91 |  |  | 3 | 8 | 15 | 534.51 | 3.8 | 22.71 |  |
| 2 | 10 | 14 | 2709.97 | 12.33 | 51.91 |  |  | 5 | 8 | 15 | 313.5 | 3.23 | 17.19 |  |
| 4 | 10 | 14 | 171.61 | 3.53 | 13.77 |  |  | 7 | 8 | 15 | 353.21 | 3.56 | 18.77 |  |
| 6 | 10 | 14 | 2015.81 | 10.02 | 44.96 |  |  | 0 | 9 | 15 | 630.33 | 6.27 | 24.16 |  |
| 8 | 10 | 14 | 230.99 | 3.32 | 15.61 |  |  | 2 | 9 | 15 | 301.38 | 3.28 | 16.7 |  |
| 10 | 10 | 14 | 790.98 | 7.77 | 28.29 |  |  | 4 | 9 | 15 | 32.65 | 2.48 | 5.13 |  |
| 1 | 11 | 14 | 104.51 | 3 | 10.6 |  |  | 6 | 9 | 15 | 353.8 | 3.52 | 18.72 |  |
| 3 | 11 | 14 | 468.8 | 4.56 | 22.82 |  |  | 8 | 9 | 15 | 214.57 | 4.15 | 14.44 |  |
| 5 | 11 | 14 | 343.44 | 3.56 | 19.74 |  |  | 1 | 10 | 15 | 522.6 | 4.34 | 23.46 |  |
| 7 | 11 | 14 | 166.99 | 3.13 | 13.53 |  |  | 3 | 10 | 15 | 40.44 | 2.55 | 5.72 |  |
| 9 | 11 | 14 | 41.52 | 2.75 | 7.11 |  |  | 5 | 10 | 15 | 186.87 | 3.03 | 13.75 |  |
| 11 | 11 | 14 | 20.59 | 5.79 | 4.37 |  |  | 7 | 10 | 15 | 136.52 | 2.99 | 11.82 |  |
| 0 | 12 | 14 | 74.12 | 3.95 | 8.55 |  |  | 9 | 10 | 15 | 67.24 | 2.84 | 8.22 |  |
| 2 | 12 | 14 | 194.5 | 3.52 | 14.19 |  |  | 0 | 11 | 15 | 115.18 | 5.21 | 11.11 |  |
| 4 | 12 | 14 | 175.51 | 3.74 | 13.32 |  |  | 2 | 11 | 15 | 174.2 | 3.24 | 12.81 |  |
| 6 | 12 | 14 | 182.97 | 3.32 | 13.44 |  |  | 4 | 11 | 15 | 389.18 | 3.76 | 20.25 |  |
| 8 | 12 | 14 | 98.53 | 3.22 | 9.3 |  |  | 6 | 11 | 15 | 37.55 | 2.83 | 5.15 |  |
| 10 | 12 | 14 | 39.31 | 3.28 | 6.36 |  |  | 8 | 11 | 15 | 27.32 | 2.79 | 6.05 |  |
| 12 | 12 | 14 | 100.82 | 4.91 | 9.89 |  |  | 10 | 11 | 15 | 99.61 | 3.13 | 9.61 |  |
| 1 | 13 | 14 | 143.43 | 3.26 | 12.51 |  |  | 1 | 12 | 15 | 12.21 | 3.55 | 3.76 |  |
| 3 | 13 | 14 | 148.59 | 3.4 | 12.48 |  |  | 3 | 12 | 15 | 193.45 | 3.23 | 14.07 |  |
| 5 | 13 | 14 | 103.81 | 3.45 | 10.15 |  |  | 5 | 12 | 15 | 120.35 | 3.13 | 10.8 |  |
| 7 | 13 | 14 | 79.76 | 3.29 | 8.77 |  |  | 7 | 12 | 15 | 51 | 2.99 | 7.03 |  |
| 9 | 13 | 14 | 57.3 | 3.34 | 7.1 |  |  | 9 | 12 | 15 | 38.52 | 3.09 | 5.97 |  |
| 11 | 13 | 14 | 36.79 | 3.47 | 5.93 |  |  | 11 | 12 | 15 | 26.84 | 3.18 | 5.25 |  |
| 13 | 13 | 14 | 24.89 | 5.31 | 5.06 |  |  | 0 | 13 | 15 | 202.23 | 7.14 | 14.43 |  |
| 2 | 14 | 14 | 694.71 | 7.91 | 26.57 |  |  | 2 | 13 | 15 | 68.09 | 3.03 | 8.52 |  |
| 4 | 14 | 14 | 250.68 | 5.59 | 15.58 |  |  | 4 | 13 | 15 | 48.21 | 3.11 | 6.79 |  |
| 6 | 14 | 14 | 1042.75 | 10.36 | 30.9 |  |  | 6 | 13 | 15 | 117.65 | 3.61 | 10.76 |  |
| 8 | 14 | 14 | 31.45 | 4.64 | 5.75 |  |  | 8 | 13 | 15 | 103.83 | 4.41 | 10.01 |  |
| 10 | 14 | 14 | 334.73 | 6.68 | 17.85 |  |  | 10 | 13 | 15 | 25.36 | 3.52 | 4.56 |  |
| 0 | 1 | 15 | 161.91 | 8.49 | 12.08 |  |  | 12 | 13 | 15 | 42.5 | 4.02 | 6.33 |  |
| 1 | 2 | 15 | 402.53 | 4.19 | 20.22 |  |  | 1 | 14 | 15 | 21.53 | 2.83 | 5.24 |  |

| h | k | l | Fcal^2 | Fobs^2 | (Fobs^2) | |  | h | k | l | Fcal^2 | Fobs^2 | (Fobs^2) | |
| --- | --- | --- | --- | --- | --- | --- | --- | --- | --- | --- | --- | --- | --- | --- |
|  |  |  |  |  |  |  |  |  |  |  |  |  |  |  |
| 3 | 14 | 15 | 64.48 | 3.12 | 8.29 |  |  | 7 | 11 | 16 | 184.25 | 3.52 | 12.68 |  |
| 5 | 14 | 15 | 144.44 | 3.84 | 11.72 |  |  | 9 | 11 | 16 | 50.15 | 3.08 | 7.47 |  |
| 7 | 14 | 15 | 90.64 | 4.02 | 9.22 |  |  | 11 | 11 | 16 | 31.81 | 6.56 | 4.56 |  |
| 9 | 14 | 15 | 34.38 | 3.46 | 6.08 |  |  | 0 | 12 | 16 | 462.74 | 6.41 | 22.03 |  |
| 11 | 14 | 15 | 19.58 | 5.18 | 4.31 |  |  | 2 | 12 | 16 | 29.38 | 2.95 | 4.91 |  |
| 0 | 15 | 15 | 28.47 | 6.56 | 5.59 |  |  | 4 | 12 | 16 | 975.78 | 6.46 | 30.5 |  |
| 2 | 15 | 15 | 75.61 | 5.18 | 8.06 |  |  | 6 | 12 | 16 | 209.56 | 3.92 | 14.37 |  |
| 4 | 15 | 15 | 42.4 | 4.91 | 6.54 |  |  | 8 | 12 | 16 | 453.92 | 4.72 | 20.71 |  |
| 6 | 15 | 15 | 66.69 | 5.18 | 7.14 |  |  | 12 | 12 | 16 | 102.06 | 6.68 | 9.82 |  |
| 8 | 15 | 15 | 64.27 | 5.31 | 8.12 |  |  | 1 | 13 | 16 | 46.07 | 3.03 | 5.84 |  |
| 10 | 15 | 15 | 58.1 | 6.13 | 7.16 |  |  | 3 | 13 | 16 | 59.37 | 3.09 | 7.64 |  |
| 0 | 0 | 16 | 3896.19 | 61.73 | 59.83 |  |  | 5 | 13 | 16 | 202.34 | 3.81 | 14.04 |  |
| 1 | 1 | 16 | 1712.25 | 14.85 | 40.61 |  |  | 7 | 13 | 16 | 92.96 | 3.62 | 9.2 |  |
| 0 | 2 | 16 | 1052.75 | 10.23 | 30.85 |  |  | 0 | 14 | 16 | 107.3 | 4.91 | 10.08 |  |
| 2 | 2 | 16 | 165.88 | 4.77 | 12.69 |  |  | 2 | 14 | 16 | 41.58 | 3.28 | 5.91 |  |
| 1 | 3 | 16 | 231.62 | 4.04 | 15.47 |  |  | 4 | 14 | 16 | 68.21 | 3.42 | 7.75 |  |
| 3 | 3 | 16 | 842.72 | 8.73 | 28.09 |  |  | 6 | 14 | 16 | 56.97 | 3.52 | 7.35 |  |
| 0 | 4 | 16 | 3101.28 | 23.87 | 54.53 |  |  | 8 | 14 | 16 | 34.94 | 3.61 | 5.61 |  |
| 2 | 4 | 16 | 248.4 | 3.86 | 15.23 |  |  | 10 | 14 | 16 | 28.58 | 3.94 | 5.06 |  |
| 4 | 4 | 16 | 2284.77 | 16.91 | 46.48 |  |  | 1 | 15 | 16 | 50.35 | 3.67 | 6.93 |  |
| 1 | 5 | 16 | 269.76 | 4.54 | 17.26 |  |  | 3 | 15 | 16 | 45.21 | 3.69 | 6.47 |  |
| 3 | 5 | 16 | 200.49 | 3.3 | 14.57 |  |  | 5 | 15 | 16 | 58.78 | 3.94 | 6.98 |  |
| 5 | 5 | 16 | 191.92 | 3.82 | 13.79 |  |  | 7 | 15 | 16 | 42.6 | 4.17 | 6 |  |
| 0 | 6 | 16 | 304.86 | 9.65 | 17.47 |  |  | 9 | 15 | 16 | 31.85 | 4.7 | 5.91 |  |
| 2 | 6 | 16 | 402.35 | 3.46 | 20.22 |  |  | 0 | 16 | 16 | 443.39 | 10.42 | 20.07 |  |
| 4 | 6 | 16 | 43.8 | 2.07 | 6.08 |  |  | 4 | 16 | 16 | 191.61 | 6.27 | 13.8 |  |
| 6 | 6 | 16 | 504.98 | 5.59 | 22.77 |  |  | 6 | 16 | 16 | 39.35 | 6.2 | 6.42 |  |
| 1 | 7 | 16 | 433.38 | 3.52 | 19.6 |  |  | 8 | 16 | 16 | 214.92 | 10.63 | 14.26 |  |
| 3 | 7 | 16 | 364.96 | 3.28 | 18.31 |  |  | 0 | 1 | 17 | 74.3 | 5.18 | 8.5 |  |
| 5 | 7 | 16 | 113.4 | 2.55 | 10.28 |  |  | 1 | 2 | 17 | 388.48 | 4.92 | 19.24 |  |
| 7 | 7 | 16 | 145.29 | 4.09 | 11.26 |  |  | 0 | 3 | 17 | 528.95 | 7.64 | 22.16 |  |
| 0 | 8 | 16 | 4658.1 | 31.78 | 66.1 |  |  | 2 | 3 | 17 | 158.6 | 4.11 | 12 |  |
| 2 | 8 | 16 | 560.79 | 4.95 | 23.62 |  |  | 1 | 4 | 17 | 89.73 | 4.11 | 9.12 |  |
| 4 | 8 | 16 | 1154.21 | 6.5 | 33.05 |  |  | 3 | 4 | 17 | 78.53 | 3.63 | 8.62 |  |
| 6 | 8 | 16 | 179.05 | 2.99 | 12.87 |  |  | 0 | 5 | 17 | 773.5 | 9.28 | 26.44 |  |
| 8 | 8 | 16 | 1808.7 | 12.96 | 41.64 |  |  | 2 | 5 | 17 | 137.6 | 4.53 | 12.03 |  |
| 1 | 9 | 16 | 430.03 | 3.91 | 20.77 |  |  | 4 | 5 | 17 | 387.68 | 4.24 | 19.81 |  |
| 3 | 9 | 16 | 175.32 | 3.48 | 13.03 |  |  | 1 | 6 | 17 | 474.76 | 5.42 | 22.08 |  |
| 5 | 9 | 16 | 447.42 | 3.95 | 21.17 |  |  | 3 | 6 | 17 | 487.22 | 7.64 | 21.95 |  |
| 7 | 9 | 16 | 305.07 | 3.61 | 17.36 |  |  | 5 | 6 | 17 | 103.9 | 2.36 | 10.24 |  |
| 9 | 9 | 16 | 83.18 | 4.22 | 9.51 |  |  | 0 | 7 | 17 | 508.69 | 8.1 | 22.46 |  |
| 0 | 10 | 16 | 143.45 | 4.09 | 11.17 |  |  | 2 | 7 | 17 | 189.52 | 3.33 | 13.9 |  |
| 2 | 10 | 16 | 211.6 | 3.33 | 14.35 |  |  | 4 | 7 | 17 | 38.66 | 2.77 | 5.78 |  |
| 4 | 10 | 16 | 190.64 | 3.45 | 13.66 |  |  | 6 | 7 | 17 | 191.11 | 3.45 | 13.49 |  |
| 8 | 10 | 16 | 143.93 | 3.28 | 12.28 |  |  | 1 | 8 | 17 | 423.25 | 3.67 | 20.53 |  |
| 10 | 10 | 16 | 104.39 | 4.77 | 10.36 |  |  | 3 | 8 | 17 | 267.45 | 3.23 | 16.36 |  |
| 1 | 11 | 16 | 260.13 | 3.47 | 15.85 |  |  | 5 | 8 | 17 | 188.44 | 4.5 | 13.08 |  |
| 5 | 11 | 16 | 82.55 | 3.5 | 8.55 |  |  | 7 | 8 | 17 | 119.25 | 3.62 | 10.74 |  |

| h | k | l | Fcal^2 | Fobs^2 | (Fobs^2) | |  | h | k | l | Fcal^2 | Fobs^2 | (Fobs^2) | |
| --- | --- | --- | --- | --- | --- | --- | --- | --- | --- | --- | --- | --- | --- | --- |
|  |  |  |  |  |  |  |  |  |  |  |  |  |  |  |
| 0 | 9 | 17 | 172.36 | 4.22 | 11.64 |  |  | 3 | 5 | 18 | 234.38 | 4.14 | 14.25 |  |
| 2 | 9 | 17 | 220.1 | 3.18 | 14.86 |  |  | 5 | 5 | 18 | 334.23 | 5.86 | 17.35 |  |
| 4 | 9 | 17 | 50.71 | 2.77 | 6.56 |  |  | 0 | 6 | 18 | 49.01 | 5.59 | 7.27 |  |
| 6 | 9 | 17 | 152.65 | 3.13 | 12.53 |  |  | 2 | 6 | 18 | 1691.47 | 10.7 | 39.48 |  |
| 8 | 9 | 17 | 104.77 | 3.18 | 9.85 |  |  | 4 | 6 | 18 | 229.03 | 4.7 | 15.02 |  |
| 1 | 10 | 17 | 252.38 | 3.42 | 15.8 |  |  | 6 | 6 | 18 | 804.35 | 8.32 | 27.62 |  |
| 3 | 10 | 17 | 15.14 | 2.51 | 3.29 |  |  | 1 | 7 | 18 | 178.33 | 3.95 | 14.22 |  |
| 5 | 10 | 17 | 46.99 | 2.89 | 6.6 |  |  | 3 | 7 | 18 | 40.18 | 2.21 | 7.23 |  |
| 7 | 10 | 17 | 70.71 | 3.7 | 8.43 |  |  | 5 | 7 | 18 | 93.67 | 2.61 | 10.14 |  |
| 9 | 10 | 17 | 46.76 | 3.08 | 7.41 |  |  | 7 | 7 | 18 | 110.9 | 3.95 | 10.8 |  |
| 0 | 11 | 17 | 28.56 | 3.95 | 5.52 |  |  | 0 | 8 | 18 | 377.01 | 5.71 | 19.03 |  |
| 2 | 11 | 17 | 90.79 | 2.99 | 9.17 |  |  | 2 | 8 | 18 | 80.83 | 2.26 | 9.39 |  |
| 4 | 11 | 17 | 187.53 | 3.32 | 12.7 |  |  | 4 | 8 | 18 | 61.13 | 2.61 | 7.34 |  |
| 6 | 11 | 17 | 16.23 | 2.87 | 3.67 |  |  | 6 | 8 | 18 | 110.96 | 2.89 | 10.2 |  |
| 8 | 11 | 17 | 100.62 | 3.52 | 9.41 |  |  | 8 | 8 | 18 | 46.29 | 3.95 | 6.98 |  |
| 10 | 11 | 17 | 75.3 | 3.47 | 8.38 |  |  | 1 | 9 | 18 | 109.2 | 2.75 | 10.28 |  |
| 1 | 12 | 17 | 24.98 | 2.89 | 4.8 |  |  | 3 | 9 | 18 | 67.39 | 2.9 | 8.33 |  |
| 3 | 12 | 17 | 140.53 | 3.41 | 12.3 |  |  | 5 | 9 | 18 | 54.27 | 2.89 | 7.46 |  |
| 5 | 12 | 17 | 38.52 | 3.03 | 6.5 |  |  | 7 | 9 | 18 | 55.55 | 3.7 | 7.55 |  |
| 7 | 12 | 17 | 21.75 | 4.5 | 4.52 |  |  | 9 | 9 | 18 | 44.21 | 4.5 | 6.99 |  |
| 9 | 12 | 17 | 21.22 | 3.32 | 4.45 |  |  | 0 | 10 | 18 | 253.59 | 7.91 | 16.22 |  |
| 0 | 13 | 17 | 44.41 | 5.21 | 6.31 |  |  | 2 | 10 | 18 | 725.13 | 5.45 | 26.56 |  |
| 2 | 13 | 17 | 70.17 | 4.16 | 8.76 |  |  | 4 | 10 | 18 | 59.28 | 3.41 | 7.74 |  |
| 4 | 13 | 17 | 76.29 | 3.37 | 7.47 |  |  | 6 | 10 | 18 | 472.43 | 4.67 | 21.66 |  |
| 6 | 13 | 17 | 19.57 | 3.18 | 5.03 |  |  | 8 | 10 | 18 | 14.3 | 2.99 | 4.64 |  |
| 8 | 13 | 17 | 57.63 | 3.37 | 6.8 |  |  | 10 | 10 | 18 | 345.77 | 6.55 | 18.58 |  |
| 12 | 13 | 17 | 35.4 | 8.32 | 5.29 |  |  | 1 | 11 | 18 | 50.47 | 2.99 | 7.25 |  |
| 3 | 14 | 17 | 16.77 | 3.18 | 3.61 |  |  | 3 | 11 | 18 | 162.48 | 3.52 | 13.17 |  |
| 5 | 14 | 17 | 94.81 | 3.61 | 9.72 |  |  | 5 | 11 | 18 | 86.85 | 3.28 | 9.43 |  |
| 7 | 14 | 17 | 78.48 | 3.85 | 8.41 |  |  | 7 | 11 | 18 | 91.19 | 3.32 | 9.88 |  |
| 9 | 14 | 17 | 35.12 | 5.5 | 5.48 |  |  | 9 | 11 | 18 | 26.55 | 3.42 | 5.49 |  |
| 0 | 15 | 17 | 67.5 | 5.59 | 7.76 |  |  | 2 | 12 | 18 | 70.94 | 3.13 | 8.2 |  |
| 2 | 15 | 17 | 64.74 | 3.95 | 7.99 |  |  | 4 | 12 | 18 | 44.3 | 4.09 | 7.01 |  |
| 4 | 15 | 17 | 18.4 | 5 | 4.28 |  |  | 6 | 12 | 18 | 42.52 | 3.23 | 6.56 |  |
| 6 | 15 | 17 | 20.43 | 3.99 | 4.52 |  |  | 8 | 12 | 18 | 52.58 | 4.26 | 6.49 |  |
| 1 | 16 | 17 | 28.17 | 4.19 | 5.53 |  |  | 10 | 12 | 18 | 38.64 | 3.99 | 5.9 |  |
| 3 | 16 | 17 | 23.49 | 6.48 | 4.3 |  |  | 1 | 13 | 18 | 15.87 | 3.09 | 4.17 |  |
| 0 | 17 | 17 | 67.33 | 10.8 | 8.48 |  |  | 3 | 13 | 18 | 127.75 | 3.61 | 10.64 |  |
| 0 | 0 | 18 | 36.66 | 10.03 | 5.94 |  |  | 5 | 13 | 18 | 29.86 | 3.36 | 5.18 |  |
| 1 | 1 | 18 | 554.69 | 8.44 | 23.38 |  |  | 9 | 13 | 18 | 26.56 | 4.42 | 4.99 |  |
| 0 | 2 | 18 | 325.38 | 6.82 | 17.66 |  |  | 2 | 14 | 18 | 284.51 | 4.79 | 16.86 |  |
| 2 | 2 | 18 | 1546.53 | 14.72 | 36.56 |  |  | 4 | 14 | 18 | 34.32 | 4.08 | 6.38 |  |
| 1 | 3 | 18 | 225 | 4.34 | 14.33 |  |  | 6 | 14 | 18 | 185.25 | 4.81 | 13.7 |  |
| 3 | 3 | 18 | 294.22 | 6.27 | 16.55 |  |  | 8 | 14 | 18 | 38.79 | 6.82 | 6.33 |  |
| 0 | 4 | 18 | 265.73 | 13.31 | 15.66 |  |  | 10 | 14 | 18 | 130.52 | 24.22 | 10.04 |  |
| 2 | 4 | 18 | 255.02 | 4.24 | 15.32 |  |  | 1 | 15 | 18 | 28.31 | 4.27 | 5.54 |  |
| 4 | 4 | 18 | 193.95 | 6.13 | 13.6 |  |  | 3 | 15 | 18 | 23.76 | 4.38 | 4.95 |  |
| 1 | 5 | 18 | 218.48 | 4.24 | 14.41 |  |  | 5 | 15 | 18 | 27.81 | 6.8 | 4.62 |  |

| h | k | l | Fcal^2 | Fobs^2 | (Fobs^2) | |  | h | k | l | Fcal^2 | Fobs^2 | (Fobs^2) | |
| --- | --- | --- | --- | --- | --- | --- | --- | --- | --- | --- | --- | --- | --- | --- |
|  |  |  |  |  |  |  |  |  |  |  |  |  |  |  |
| 7 | 15 | 18 | 27.33 | 7.7 | 4.88 |  |  | 0 | 15 | 19 | 95.23 | 9.06 | 9.83 |  |
| 0 | 16 | 18 | 88.75 | 8.4 | 8.9 |  |  | 2 | 15 | 19 | 31.46 | 5.28 | 5.36 |  |
| 2 | 16 | 18 | 46.23 | 5.84 | 6.71 |  |  | 0 | 0 | 20 | 699.43 | 23.92 | 25.76 |  |
| 6 | 18 | 18 | 125.59 | 39.35 | 8.97 |  |  | 1 | 1 | 20 | 32.19 | 5.31 | 5.29 |  |
| 0 | 1 | 19 | 83.64 | 5.31 | 8.83 |  |  | 0 | 2 | 20 | 39.99 | 5.59 | 5.42 |  |
| 1 | 2 | 19 | 89.01 | 3.76 | 8.85 |  |  | 2 | 2 | 20 | 166.04 | 6.13 | 12.78 |  |
| 2 | 3 | 19 | 192.01 | 4 | 13.11 |  |  | 1 | 3 | 20 | 134.78 | 4.71 | 11.23 |  |
| 1 | 4 | 19 | 302.73 | 4.71 | 16.49 |  |  | 3 | 3 | 20 | 69.02 | 5.86 | 7.22 |  |
| 3 | 4 | 19 | 314.84 | 5.05 | 16.77 |  |  | 0 | 4 | 20 | 703.84 | 9.95 | 25.01 |  |
| 0 | 5 | 19 | 111.99 | 6.27 | 9.77 |  |  | 2 | 4 | 20 | 132.63 | 5.07 | 11.28 |  |
| 2 | 5 | 19 | 267.09 | 4.72 | 15.71 |  |  | 4 | 4 | 20 | 1267.15 | 13.63 | 33.69 |  |
| 4 | 5 | 19 | 58.44 | 3.86 | 7.16 |  |  | 1 | 5 | 20 | 115.77 | 5.45 | 8.93 |  |
| 1 | 6 | 19 | 54.48 | 3.8 | 7.44 |  |  | 3 | 5 | 20 | 206.4 | 4.58 | 13.59 |  |
| 3 | 6 | 19 | 114.9 | 3.85 | 10.23 |  |  | 5 | 5 | 20 | 255.62 | 6.55 | 15.33 |  |
| 5 | 6 | 19 | 46.84 | 5.49 | 7.68 |  |  | 0 | 6 | 20 | 94.36 | 6.13 | 9.15 |  |
| 0 | 7 | 19 | 189.4 | 6.68 | 13.25 |  |  | 2 | 6 | 20 | 87.16 | 3.95 | 9.26 |  |
| 2 | 7 | 19 | 152.99 | 5.2 | 11.88 |  |  | 4 | 6 | 20 | 170.94 | 7.25 | 12.72 |  |
| 4 | 7 | 19 | 55.73 | 3.66 | 7.27 |  |  | 1 | 7 | 20 | 16.9 | 3.9 | 4.1 |  |
| 6 | 7 | 19 | 38.8 | 2.52 | 6.83 |  |  | 3 | 7 | 20 | 135.2 | 4.44 | 11.08 |  |
| 1 | 8 | 19 | 166.87 | 5.14 | 13.01 |  |  | 5 | 7 | 20 | 62.03 | 5.46 | 7.74 |  |
| 3 | 8 | 19 | 24.31 | 2.3 | 5.52 |  |  | 7 | 7 | 20 | 31.24 | 4.22 | 6.23 |  |
| 5 | 8 | 19 | 45.5 | 2.46 | 7 |  |  | 0 | 8 | 20 | 516.06 | 9.11 | 21.51 |  |
| 7 | 8 | 19 | 33.35 | 2.73 | 5.42 |  |  | 2 | 8 | 20 | 36 | 4.51 | 6.15 |  |
| 0 | 9 | 19 | 49.69 | 3.27 | 7.24 |  |  | 4 | 8 | 20 | 414.71 | 7.5 | 19.51 |  |
| 2 | 9 | 19 | 21.35 | 2.85 | 5.45 |  |  | 8 | 8 | 20 | 142.95 | 4.82 | 12.89 |  |
| 4 | 9 | 19 | 73.12 | 3.26 | 9.42 |  |  | 1 | 9 | 20 | 18.81 | 4.22 | 4.66 |  |
| 6 | 9 | 19 | 56.35 | 2.84 | 7.6 |  |  | 3 | 9 | 20 | 38.77 | 4.78 | 7.19 |  |
| 8 | 9 | 19 | 31.13 | 2.99 | 5.8 |  |  | 5 | 9 | 20 | 23.51 | 2.75 | 5.38 |  |
| 1 | 10 | 19 | 93.84 | 2.94 | 10.02 |  |  | 9 | 9 | 20 | 47.44 | 6.53 | 7.05 |  |
| 3 | 10 | 19 | 78.51 | 2.94 | 9.54 |  |  | 2 | 10 | 20 | 25.56 | 2.95 | 5.57 |  |
| 5 | 10 | 19 | 43.2 | 2.99 | 7.31 |  |  | 4 | 10 | 20 | 29.41 | 3.31 | 5.37 |  |
| 7 | 10 | 19 | 16.13 | 4.22 | 3.38 |  |  | 6 | 10 | 20 | 55.35 | 3.57 | 7.86 |  |
| 9 | 10 | 19 | 20.27 | 3.43 | 4.26 |  |  | 8 | 10 | 20 | 44.44 | 4.51 | 7.1 |  |
| 2 | 11 | 19 | 16.82 | 2.83 | 4.31 |  |  | 1 | 11 | 20 | 63.66 | 3.46 | 8.67 |  |
| 4 | 11 | 19 | 70.57 | 3.18 | 8.87 |  |  | 3 | 11 | 20 | 34.39 | 3.55 | 5.59 |  |
| 6 | 11 | 19 | 46.67 | 3.41 | 6.57 |  |  | 5 | 11 | 20 | 41.67 | 4.13 | 6.03 |  |
| 8 | 11 | 19 | 39.41 | 4.24 | 6.4 |  |  | 0 | 12 | 20 | 162.66 | 7.14 | 12.61 |  |
| 10 | 11 | 19 | 59.34 | 4.8 | 7.73 |  |  | 2 | 12 | 20 | 63.88 | 4.43 | 8.65 |  |
| 3 | 12 | 19 | 63.58 | 3.65 | 7.88 |  |  | 4 | 12 | 20 | 251.93 | 9.22 | 16.06 |  |
| 5 | 12 | 19 | 28.77 | 3.74 | 5.15 |  |  | 8 | 12 | 20 | 124.54 | 5.66 | 12.54 |  |
| 7 | 12 | 19 | 46 | 3.66 | 6.84 |  |  | 1 | 13 | 20 | 48.8 | 4.47 | 7.19 |  |
| 9 | 12 | 19 | 34.57 | 4.92 | 6.19 |  |  | 4 | 14 | 20 | 24.83 | 7.32 | 5.22 |  |
| 0 | 13 | 19 | 24.4 | 4.91 | 4.09 |  |  | 0 | 16 | 20 | 63.79 | 19.87 | 9.63 |  |
| 2 | 13 | 19 | 26.9 | 3.32 | 4.96 |  |  | 0 | 1 | 21 | 108.3 | 6.27 | 10.36 |  |
| 4 | 13 | 19 | 50.06 | 4.06 | 6.25 |  |  | 1 | 2 | 21 | 91.45 | 4.64 | 9.34 |  |
| 6 | 13 | 19 | 34.45 | 4.03 | 5.72 |  |  | 0 | 3 | 21 | 51.9 | 6.13 | 6.93 |  |
| 1 | 14 | 19 | 35.55 | 3.85 | 6.25 |  |  | 2 | 3 | 21 | 54.05 | 4.53 | 6.79 |  |
| 3 | 14 | 19 | 19.08 | 5.1 | 4.14 |  |  | 1 | 4 | 21 | 53.23 | 4.14 | 6.84 |  |

| h | k | l | Fcal^2 | Fobs^2 | (Fobs^2) | |  | h | k | l | Fcal^2 | Fobs^2 | (Fobs^2) | |
| --- | --- | --- | --- | --- | --- | --- | --- | --- | --- | --- | --- | --- | --- | --- |
|  |  |  |  |  |  |  |  |  |  |  |  |  |  |  |
| 3 | 4 | 21 | 108.33 | 4.24 | 9.98 |  |  |  |  |  |  |  |  |  |
| 2 | 5 | 21 | 91.21 | 4.82 | 9.42 |  |  |  |  |  |  |  |  |  |
| 4 | 5 | 21 | 71.35 | 4.3 | 8.08 |  |  |  |  |  |  |  |  |  |
| 1 | 6 | 21 | 26.26 | 4.14 | 4.81 |  |  |  |  |  |  |  |  |  |
| 3 | 6 | 21 | 88.27 | 4.28 | 9.06 |  |  |  |  |  |  |  |  |  |
| 5 | 6 | 21 | 39.03 | 4.1 | 5.98 |  |  |  |  |  |  |  |  |  |
| 0 | 7 | 21 | 68.13 | 6.1 | 7.43 |  |  |  |  |  |  |  |  |  |
| 2 | 7 | 21 | 31.06 | 4 | 5.66 |  |  |  |  |  |  |  |  |  |
| 4 | 7 | 21 | 111.49 | 4.53 | 10.1 |  |  |  |  |  |  |  |  |  |
| 1 | 8 | 21 | 47.66 | 4.19 | 6.71 |  |  |  |  |  |  |  |  |  |
| 7 | 8 | 21 | 20.29 | 6.68 | 3.76 |  |  |  |  |  |  |  |  |  |
| 0 | 9 | 21 | 48.34 | 6.27 | 6.59 |  |  |  |  |  |  |  |  |  |
| 2 | 9 | 21 | 21.74 | 5.86 | 4.74 |  |  |  |  |  |  |  |  |  |
| 4 | 9 | 21 | 55.11 | 4.85 | 7.48 |  |  |  |  |  |  |  |  |  |
| 8 | 9 | 21 | 28.58 | 4.91 | 5.46 |  |  |  |  |  |  |  |  |  |
| 3 | 10 | 21 | 22.65 | 6.26 | 4.15 |  |  |  |  |  |  |  |  |  |
| 5 | 10 | 21 | 36.75 | 4.51 | 6.17 |  |  |  |  |  |  |  |  |  |
| 7 | 10 | 21 | 29.7 | 5.54 | 4.95 |  |  |  |  |  |  |  |  |  |
| 2 | 11 | 21 | 34.14 | 4.32 | 5.86 |  |  |  |  |  |  |  |  |  |
| 6 | 11 | 21 | 29.74 | 5.23 | 5.45 |  |  |  |  |  |  |  |  |  |
| 3 | 12 | 21 | 44.29 | 10.23 | 6.66 |  |  |  |  |  |  |  |  |  |
| 4 | 13 | 21 | 34.51 | 7.19 | 5.57 |  |  |  |  |  |  |  |  |  |
| 3 | 14 | 21 | 35.41 | 6.47 | 5.71 |  |  |  |  |  |  |  |  |  |
| 0 | 0 | 22 | 370.02 | 18.91 | 18.91 |  |  |  |  |  |  |  |  |  |
| 0 | 2 | 22 | 18.29 | 5.71 | 3.57 |  |  |  |  |  |  |  |  |  |
| 2 | 2 | 22 | 430.41 | 8.18 | 19.5 |  |  |  |  |  |  |  |  |  |
| 1 | 3 | 22 | 71.39 | 4.62 | 7.98 |  |  |  |  |  |  |  |  |  |
| 3 | 3 | 22 | 72.08 | 5.86 | 8.3 |  |  |  |  |  |  |  |  |  |
| 2 | 4 | 22 | 68.19 | 4.35 | 7.9 |  |  |  |  |  |  |  |  |  |
| 4 | 4 | 22 | 84.33 | 5.86 | 8.75 |  |  |  |  |  |  |  |  |  |
| 1 | 5 | 22 | 42.17 | 4.39 | 5.92 |  |  |  |  |  |  |  |  |  |
| 3 | 5 | 22 | 33 | 4.14 | 5.68 |  |  |  |  |  |  |  |  |  |
| 5 | 5 | 22 | 48.63 | 6.27 | 6.56 |  |  |  |  |  |  |  |  |  |
|  |  |  |  |  |  |  |  |  |  |  |  |  |  |  |
|  |  |  |  |  |  |  |  |  |  |  |  |  |  |  |
|  |  |  |  |  |  |  |  |  |  |  |  |  |  |  |
|  |  |  |  |  |  |  |  |  |  |  |  |  |  |  |
|  |  |  |  |  |  |  |  |  |  |  |  |  |  |  |
|  |  |  |  |  |  |  |  |  |  |  |  |  |  |  |
|  |  |  |  |  |  |  |  |  |  |  |  |  |  |  |
|  |  |  |  |  |  |  |  |  |  |  |  |  |  |  |
|  |  |  |  |  |  |  |  |  |  |  |  |  |  |  |
|  |  |  |  |  |  |  |  |  |  |  |  |  |  |  |
|  |  |  |  |  |  |  |  |  |  |  |  |  |  |  |
|  |  |  |  |  |  |  |  |  |  |  |  |  |  |  |
|  |  |  |  |  |  |  |  |  |  |  |  |  |  |  |
|  |  |  |  |  |  |  |  |  |  |  |  |  |  |  |
|  |  |  |  |  |  |  |  |  |  |  |  |  |  |  |

Crystal 4

| h | k | l | Fcal^2 | Fobs^2 | σ(Fobs^2) | |  | h | k | l | Fcal^2 | Fobs^2 | σ(Fobs^2) | |
| --- | --- | --- | --- | --- | --- | --- | --- | --- | --- | --- | --- | --- | --- | --- |
|  |  |  |  |  |  |  |  |  |  |  |  |  |  |  |
| 0 | 2 | 2 | 18180.78 | 131.56 | 139.02 |  |  | 4 | 5 | 7 | 8121.97 | 40.53 | 93.48 |  |
| 0 | 1 | 3 | 14002.93 | 156.14 | 127.94 |  |  | 1 | 6 | 7 | 5394.34 | 27.24 | 76.83 |  |
| 1 | 2 | 3 | 2496.77 | 15.53 | 57.21 |  |  | 3 | 6 | 7 | 8969.65 | 43.1 | 97.14 |  |
| 0 | 3 | 3 | 1675.64 | 13.33 | 42.42 |  |  | 5 | 6 | 7 | 5765.94 | 27.99 | 78.09 |  |
| 2 | 3 | 3 | 33913.32 | 219.5 | 184.76 |  |  | 0 | 7 | 7 | 9233.19 | 63.57 | 99.85 |  |
| 0 | 0 | 4 | 390.5 | 8.09 | 25.09 |  |  | 2 | 7 | 7 | 5233.88 | 39.4 | 75.8 |  |
| 1 | 1 | 4 | 9843.88 | 74.16 | 106.51 |  |  | 4 | 7 | 7 | 6368.41 | 40.91 | 78.16 |  |
| 0 | 2 | 4 | 2780.85 | 15.37 | 57.29 |  |  | 6 | 7 | 7 | 8643.55 | 61.62 | 92.41 |  |
| 2 | 2 | 4 | 18251.43 | 125.1 | 142.05 |  |  | 0 | 0 | 8 | 87597.43 | 1111.81 | 277.2 |  |
| 1 | 3 | 4 | 30644.12 | 323.08 | 174.45 |  |  | 1 | 1 | 8 | 1768.43 | 15.35 | 49.5 |  |
| 3 | 3 | 4 | 39310.12 | 258 | 191.72 |  |  | 0 | 2 | 8 | 1176.46 | 7.82 | 38.3 |  |
| 2 | 4 | 4 | 30685.11 | 215.86 | 169.38 |  |  | 2 | 2 | 8 | 11519.63 | 80.52 | 108.26 |  |
| 0 | 1 | 5 | 1753.4 | 10.74 | 48.51 |  |  | 1 | 3 | 8 | 6735.53 | 38.17 | 85.22 |  |
| 1 | 2 | 5 | 3124.32 | 28.29 | 61.8 |  |  | 3 | 3 | 8 | 3494.93 | 25.93 | 62.58 |  |
| 0 | 3 | 5 | 1382.39 | 8.3 | 44.04 |  |  | 0 | 4 | 8 | 53408.93 | 254.9 | 222.96 |  |
| 2 | 3 | 5 | 17824.32 | 141.69 | 137.66 |  |  | 2 | 4 | 8 | 10029.47 | 48.63 | 102.9 |  |
| 1 | 4 | 5 | 9004.51 | 43.7 | 101.43 |  |  | 4 | 4 | 8 | 38329.23 | 246.39 | 196.11 |  |
| 3 | 4 | 5 | 5525.83 | 37.16 | 79.96 |  |  | 1 | 5 | 8 | 11752.5 | 59.98 | 109.74 |  |
| 0 | 5 | 5 | 15098.23 | 100.81 | 127.86 |  |  | 3 | 5 | 8 | 3608.96 | 34.68 | 64.44 |  |
| 2 | 5 | 5 | 700.11 | 6.45 | 31.25 |  |  | 5 | 5 | 8 | 2310.9 | 16.41 | 48.41 |  |
| 4 | 5 | 5 | 17072.31 | 116.4 | 131 |  |  | 0 | 6 | 8 | 13072.9 | 115.38 | 114.17 |  |
| 0 | 0 | 6 | 1654.15 | 20.02 | 44.62 |  |  | 2 | 6 | 8 | 2267.24 | 13.02 | 50.45 |  |
| 1 | 1 | 6 | 5592.27 | 42.53 | 82.33 |  |  | 4 | 6 | 8 | 1993.79 | 11.19 | 45.99 |  |
| 0 | 2 | 6 | 6526.57 | 35.26 | 88.3 |  |  | 6 | 6 | 8 | 4438.69 | 32.46 | 67.81 |  |
| 2 | 2 | 6 | 71273.77 | 570.75 | 250.83 |  |  | 1 | 7 | 8 | 5995.43 | 50.27 | 78.75 |  |
| 1 | 3 | 6 | 3650.3 | 27.29 | 68.9 |  |  | 3 | 7 | 8 | 9217.31 | 48.61 | 96.64 |  |
| 3 | 3 | 6 | 8265.48 | 61.59 | 94.97 |  |  | 5 | 7 | 8 | 7815.6 | 39.39 | 88.43 |  |
| 0 | 4 | 6 | 4579.88 | 37.85 | 71.67 |  |  | 7 | 7 | 8 | 6875.94 | 49.92 | 82.52 |  |
| 2 | 4 | 6 | 7662.3 | 42.48 | 90.17 |  |  | 0 | 8 | 8 | 59463.01 | 383.4 | 228.89 |  |
| 4 | 4 | 6 | 6990.43 | 47.95 | 87.65 |  |  | 2 | 8 | 8 | 8769.51 | 64.34 | 92.72 |  |
| 1 | 5 | 6 | 12538 | 59.33 | 115.31 |  |  | 4 | 8 | 8 | 45503.11 | 294.39 | 204.11 |  |
| 3 | 5 | 6 | 12417.79 | 60.69 | 113.13 |  |  | 6 | 8 | 8 | 8091.25 | 58.2 | 89.62 |  |
| 5 | 5 | 6 | 17005.4 | 115.43 | 130.36 |  |  | 8 | 8 | 8 | 26341.45 | 301.94 | 158.47 |  |
| 0 | 6 | 6 | 9985.77 | 68.84 | 98.91 |  |  | 0 | 1 | 9 | 12748.37 | 65.01 | 115.34 |  |
| 2 | 6 | 6 | 58645.32 | 400.04 | 232.03 |  |  | 1 | 2 | 9 | 9818.61 | 51.39 | 101.89 |  |
| 4 | 6 | 6 | 14311.64 | 94.17 | 119.71 |  |  | 0 | 3 | 9 | 4066.55 | 22.82 | 68.25 |  |
| 6 | 6 | 6 | 105357.55 | 1166.44 | 290.2 |  |  | 2 | 3 | 9 | 2854.39 | 16.89 | 56.98 |  |
| 0 | 1 | 7 | 7216.99 | 39.56 | 91.34 |  |  | 1 | 4 | 9 | 2807.75 | 15.61 | 57.16 |  |
| 1 | 2 | 7 | 8242.44 | 46.15 | 97.38 |  |  | 3 | 4 | 9 | 8069.35 | 41.53 | 92.06 |  |
| 0 | 3 | 7 | 2648.87 | 15.48 | 58.3 |  |  | 0 | 5 | 9 | 2449.62 | 17.73 | 49.72 |  |
| 2 | 3 | 7 | 5713.25 | 30.22 | 78.27 |  |  | 2 | 5 | 9 | 6579.45 | 33.74 | 84.59 |  |
| 1 | 4 | 7 | 7285.58 | 35.64 | 89.55 |  |  | 4 | 5 | 9 | 3789.76 | 20.64 | 64.6 |  |
| 3 | 4 | 7 | 4456.72 | 46.47 | 70.45 |  |  | 1 | 6 | 9 | 4333.77 | 33.61 | 67.28 |  |
| 0 | 5 | 7 | 4095.43 | 28.96 | 68.97 |  |  | 3 | 6 | 9 | 3622.17 | 34.88 | 62.85 |  |
| 2 | 5 | 7 | 2729.04 | 17.25 | 53.13 |  |  | 5 | 6 | 9 | 1796.59 | 10.69 | 45.21 |  |

| h | k | l | Fcal^2 | Fobs^2 | (Fobs^2) | |  | h | k | l | Fcal^2 | Fobs^2 | (Fobs^2) | |
| --- | --- | --- | --- | --- | --- | --- | --- | --- | --- | --- | --- | --- | --- | --- |
|  |  |  |  |  |  |  |  |  |  |  |  |  |  |  |
| 0 | 7 | 9 | 7732.16 | 38.77 | 87.13 |  |  | 10 | 10 | 10 | 15538.56 | 190.42 | 117.93 |  |
| 2 | 7 | 9 | 8506.81 | 41.58 | 93.55 |  |  | 0 | 1 | 11 | 7697.58 | 40.3 | 89.59 |  |
| 4 | 7 | 9 | 1678.75 | 9.61 | 42.18 |  |  | 1 | 2 | 11 | 6030.72 | 33.41 | 78.73 |  |
| 6 | 7 | 9 | 3548.17 | 24.27 | 60.01 |  |  | 0 | 3 | 11 | 7227.35 | 38.61 | 86.74 |  |
| 1 | 8 | 9 | 4176.97 | 21.93 | 65.78 |  |  | 2 | 3 | 11 | 2328.15 | 14.25 | 51.54 |  |
| 3 | 8 | 9 | 4141.72 | 23.32 | 65.55 |  |  | 1 | 4 | 11 | 572.92 | 8.73 | 26.13 |  |
| 5 | 8 | 9 | 5708.06 | 29.99 | 76.74 |  |  | 3 | 4 | 11 | 6596.79 | 36.52 | 82.83 |  |
| 7 | 8 | 9 | 2627.89 | 15.61 | 52.35 |  |  | 0 | 5 | 11 | 4322.96 | 24.28 | 66.43 |  |
| 0 | 9 | 9 | 5948.63 | 43.48 | 80.38 |  |  | 2 | 5 | 11 | 6229.16 | 39.65 | 81.12 |  |
| 2 | 9 | 9 | 5123.26 | 35.75 | 73.35 |  |  | 4 | 5 | 11 | 4314.14 | 23.43 | 66.17 |  |
| 4 | 9 | 9 | 1389.3 | 13.34 | 34.81 |  |  | 1 | 6 | 11 | 4433.04 | 43.33 | 69.5 |  |
| 6 | 9 | 9 | 4952.09 | 36.34 | 70.52 |  |  | 3 | 6 | 11 | 5203.62 | 29.08 | 71.27 |  |
| 8 | 9 | 9 | 1832.35 | 17.05 | 43.62 |  |  | 5 | 6 | 11 | 1944.97 | 11.81 | 44.08 |  |
| 0 | 0 | 10 | 48664.75 | 465.65 | 209.65 |  |  | 0 | 7 | 11 | 4087.17 | 33.76 | 65.38 |  |
| 1 | 1 | 10 | 1134.9 | 9.9 | 34.82 |  |  | 2 | 7 | 11 | 2947.6 | 17.35 | 54.14 |  |
| 0 | 2 | 10 | 1478.43 | 11.19 | 39.1 |  |  | 4 | 7 | 11 | 7263.66 | 37.74 | 85.35 |  |
| 2 | 2 | 10 | 46578.24 | 335.94 | 209.08 |  |  | 6 | 7 | 11 | 535.13 | 5.19 | 24.69 |  |
| 1 | 3 | 10 | 5217.91 | 45.63 | 76.21 |  |  | 1 | 8 | 11 | 4397.25 | 23.78 | 66.12 |  |
| 3 | 3 | 10 | 15252.62 | 100.83 | 121.93 |  |  | 3 | 8 | 11 | 131.72 | 3.55 | 12.06 |  |
| 0 | 4 | 10 | 232.55 | 3.72 | 15.13 |  |  | 5 | 8 | 11 | 125.38 | 5.73 | 11.92 |  |
| 2 | 4 | 10 | 8632.09 | 44.97 | 94.35 |  |  | 7 | 8 | 11 | 597.58 | 11.93 | 25.36 |  |
| 4 | 4 | 10 | 8676.92 | 67.53 | 95.75 |  |  | 0 | 9 | 11 | 2169.27 | 13.23 | 49.8 |  |
| 1 | 5 | 10 | 5297.8 | 27.99 | 75.28 |  |  | 2 | 9 | 11 | 1882.81 | 11.08 | 44.11 |  |
| 3 | 5 | 10 | 3562.24 | 30.26 | 61.09 |  |  | 4 | 9 | 11 | 2599.58 | 16.08 | 49.51 |  |
| 5 | 5 | 10 | 1545.38 | 14.06 | 40.27 |  |  | 6 | 9 | 11 | 1848.18 | 12.71 | 44.95 |  |
| 0 | 6 | 10 | 4374.14 | 24.08 | 69.06 |  |  | 8 | 9 | 11 | 3333.44 | 19.14 | 57.68 |  |
| 2 | 6 | 10 | 48768.57 | 240.68 | 210.7 |  |  | 1 | 10 | 11 | 718.73 | 6.88 | 27.46 |  |
| 4 | 6 | 10 | 2398.79 | 15.29 | 49.41 |  |  | 3 | 10 | 11 | 1756.81 | 11.15 | 41.85 |  |
| 6 | 6 | 10 | 16944.22 | 112.55 | 131.67 |  |  | 5 | 10 | 11 | 1456.46 | 10.16 | 37.73 |  |
| 1 | 7 | 10 | 5802.69 | 29.44 | 76.51 |  |  | 7 | 10 | 11 | 2203.62 | 14.5 | 46.8 |  |
| 3 | 7 | 10 | 2372.89 | 13.65 | 52.51 |  |  | 9 | 10 | 11 | 1888.99 | 12.69 | 42.45 |  |
| 5 | 7 | 10 | 3827.41 | 20.73 | 64.27 |  |  | 0 | 11 | 11 | 3.18 | 4.58 | 1.81 |  |
| 7 | 7 | 10 | 2112.61 | 17.76 | 45.84 |  |  | 2 | 11 | 11 | 2545.44 | 21.7 | 50.17 |  |
| 0 | 8 | 10 | 5215.91 | 57.47 | 74.29 |  |  | 4 | 11 | 11 | 269.08 | 6.64 | 16.52 |  |
| 2 | 8 | 10 | 5650.79 | 28.28 | 75.97 |  |  | 6 | 11 | 11 | 4120.48 | 33.41 | 64.82 |  |
| 4 | 8 | 10 | 1313.18 | 9.65 | 34.61 |  |  | 8 | 11 | 11 | 4496.06 | 35.47 | 64.73 |  |
| 6 | 8 | 10 | 3422.28 | 18.85 | 58.31 |  |  | 10 | 11 | 11 | 1064.79 | 12.39 | 31.8 |  |
| 8 | 8 | 10 | 2490.93 | 20.09 | 51.47 |  |  | 0 | 0 | 12 | 37011.99 | 358.6 | 187.3 |  |
| 1 | 9 | 10 | 3159.61 | 17.45 | 56.98 |  |  | 1 | 1 | 12 | 3661.71 | 30.74 | 62.34 |  |
| 3 | 9 | 10 | 2620.45 | 15.44 | 51.08 |  |  | 0 | 2 | 12 | 5892.41 | 49.26 | 79.53 |  |
| 5 | 9 | 10 | 3487.79 | 19.84 | 58.47 |  |  | 2 | 2 | 12 | 4403.67 | 37.32 | 64.92 |  |
| 7 | 9 | 10 | 1884.85 | 12.7 | 43.15 |  |  | 1 | 3 | 12 | 3440.22 | 26.16 | 61.32 |  |
| 9 | 9 | 10 | 1721 | 17.04 | 41.07 |  |  | 3 | 3 | 12 | 2416.29 | 19.87 | 49.31 |  |
| 0 | 10 | 10 | 1150.68 | 11.72 | 32.03 |  |  | 0 | 4 | 12 | 30998.94 | 209.9 | 174.83 |  |
| 2 | 10 | 10 | 18729.27 | 122.2 | 135.21 |  |  | 2 | 4 | 12 | 1833.85 | 13.84 | 42.93 |  |
| 4 | 10 | 10 | 3778.7 | 30.85 | 61.16 |  |  | 4 | 4 | 12 | 43453.42 | 306.43 | 197.32 |  |
| 6 | 10 | 10 | 23038.52 | 161.2 | 148.08 |  |  | 1 | 5 | 12 | 5056.6 | 28.24 | 73.78 |  |
| 8 | 10 | 10 | 1762.97 | 18.2 | 41.16 |  |  | 3 | 5 | 12 | 4470.63 | 24.53 | 67.33 |  |

| h | k | l | Fcal^2 | Fobs^2 | (Fobs^2) | |  | h | k | l | Fcal^2 | Fobs^2 | (Fobs^2) | |
| --- | --- | --- | --- | --- | --- | --- | --- | --- | --- | --- | --- | --- | --- | --- |
|  |  |  |  |  |  |  |  |  |  |  |  |  |  |  |
| 1 | 5 | 14 | 288.95 | 5.32 | 16.75 |  |  | 2 | 14 | 14 | 5706.06 | 44.6 | 73.64 |  |
| 3 | 5 | 14 | 1299.87 | 9.75 | 37.45 |  |  | 4 | 14 | 14 | 1721.05 | 17.7 | 40.67 |  |
| 5 | 5 | 14 | 7479.63 | 63.85 | 86.98 |  |  | 6 | 14 | 14 | 8411.6 | 68.18 | 87.01 |  |
| 0 | 6 | 14 | 1756.47 | 26.13 | 41.19 |  |  | 8 | 14 | 14 | 354.8 | 8.93 | 18.23 |  |
| 2 | 6 | 14 | 18666.4 | 100.32 | 133.7 |  |  | 10 | 14 | 14 | 3792.6 | 32.34 | 59.76 |  |
| 4 | 6 | 14 | 991.41 | 8.01 | 31.08 |  |  | 12 | 14 | 14 | 196.27 | 9.16 | 14.01 |  |
| 6 | 6 | 14 | 11734.74 | 84.93 | 105.64 |  |  | 14 | 14 | 14 | 2403.33 | 41.17 | 46.73 |  |
| 1 | 7 | 14 | 2396.03 | 15.97 | 48.66 |  |  | 0 | 1 | 15 | 679.94 | 6.48 | 26.91 |  |
| 3 | 7 | 14 | 877.49 | 7.61 | 29.24 |  |  | 1 | 2 | 15 | 1574.05 | 11.2 | 40.72 |  |
| 5 | 7 | 14 | 988.16 | 8.3 | 30.45 |  |  | 0 | 3 | 15 | 4663.79 | 27.66 | 68.52 |  |
| 7 | 7 | 14 | 3090.99 | 27.29 | 55.32 |  |  | 2 | 3 | 15 | 1754.14 | 13.12 | 42.27 |  |
| 0 | 8 | 14 | 2480.05 | 16.11 | 48.33 |  |  | 1 | 4 | 15 | 1984.55 | 13.73 | 43.95 |  |
| 2 | 8 | 14 | 2479.24 | 16.96 | 48.91 |  |  | 3 | 4 | 15 | 474.81 | 6.06 | 21.34 |  |
| 4 | 8 | 14 | 795.17 | 7.53 | 29.22 |  |  | 0 | 5 | 15 | 799.95 | 7.28 | 28.47 |  |
| 6 | 8 | 14 | 1826.59 | 12.29 | 42.35 |  |  | 2 | 5 | 15 | 1673.76 | 12.13 | 41.12 |  |
| 8 | 8 | 14 | 1633.17 | 16.33 | 39.31 |  |  | 4 | 5 | 15 | 4381.73 | 27.16 | 65.97 |  |
| 1 | 9 | 14 | 4181.59 | 25.43 | 64.76 |  |  | 1 | 6 | 15 | 2197.69 | 14.67 | 46.46 |  |
| 3 | 9 | 14 | 1405.03 | 10.95 | 38.13 |  |  | 3 | 6 | 15 | 3202.03 | 21.76 | 56.53 |  |
| 5 | 9 | 14 | 361.47 | 6.18 | 18.37 |  |  | 5 | 6 | 15 | 555.82 | 6.73 | 23.3 |  |
| 7 | 9 | 14 | 1918.39 | 13.02 | 43.11 |  |  | 0 | 7 | 15 | 2272.91 | 15.04 | 46.88 |  |
| 9 | 9 | 14 | 2366.91 | 21.2 | 49.29 |  |  | 2 | 7 | 15 | 1712.59 | 15.42 | 41.76 |  |
| 0 | 10 | 14 | 3158.05 | 19.88 | 56.19 |  |  | 4 | 7 | 15 | 926.02 | 9.15 | 30.04 |  |
| 2 | 10 | 14 | 14016.39 | 74.94 | 115.17 |  |  | 6 | 7 | 15 | 1998.89 | 13.6 | 44.42 |  |
| 4 | 10 | 14 | 946.09 | 8.38 | 30.61 |  |  | 1 | 8 | 15 | 2756.15 | 17.9 | 51.51 |  |
| 6 | 10 | 14 | 11684 | 60.19 | 105.08 |  |  | 3 | 8 | 15 | 2440.95 | 16.22 | 50.14 |  |
| 8 | 10 | 14 | 1434.85 | 15.62 | 37.42 |  |  | 5 | 8 | 15 | 1460.61 | 10.36 | 37.75 |  |
| 10 | 10 | 14 | 6193.93 | 47.67 | 76.54 |  |  | 7 | 8 | 15 | 1896.62 | 13.18 | 43.13 |  |
| 1 | 11 | 14 | 714.64 | 7.91 | 26.54 |  |  | 0 | 9 | 15 | 2915.29 | 18.37 | 53.09 |  |
| 3 | 11 | 14 | 2592.66 | 16.47 | 51.13 |  |  | 2 | 9 | 15 | 1534.06 | 11.65 | 38.31 |  |
| 5 | 11 | 14 | 2121.55 | 14.57 | 45.33 |  |  | 4 | 9 | 15 | 172.84 | 5.08 | 13 |  |
| 7 | 11 | 14 | 1076.74 | 9.01 | 31.81 |  |  | 6 | 9 | 15 | 1931.9 | 13.76 | 43.74 |  |
| 9 | 11 | 14 | 383.11 | 6.99 | 19.41 |  |  | 8 | 9 | 15 | 1307.91 | 10.15 | 35.74 |  |
| 11 | 11 | 14 | 194.09 | 7.79 | 14.15 |  |  | 1 | 10 | 15 | 2800.87 | 23.88 | 51.97 |  |
| 0 | 12 | 14 | 528.29 | 7.11 | 23.05 |  |  | 3 | 10 | 15 | 289.43 | 8.25 | 16.3 |  |
| 2 | 12 | 14 | 1261.02 | 9.89 | 35.33 |  |  | 5 | 10 | 15 | 1212.3 | 10.45 | 34.48 |  |
| 4 | 12 | 14 | 1092.05 | 9.25 | 32.28 |  |  | 7 | 10 | 15 | 891.32 | 7.79 | 29.67 |  |
| 6 | 12 | 14 | 1219.03 | 13.89 | 33.1 |  |  | 9 | 10 | 15 | 531.09 | 8.14 | 22.24 |  |
| 8 | 12 | 14 | 745.62 | 7.29 | 26.22 |  |  | 0 | 11 | 15 | 807.2 | 8.6 | 28.28 |  |
| 10 | 12 | 14 | 350.51 | 6.31 | 19.08 |  |  | 2 | 11 | 15 | 1021.9 | 8.82 | 31.43 |  |
| 12 | 12 | 14 | 964.3 | 13.31 | 30.11 |  |  | 4 | 11 | 15 | 2462.68 | 16.46 | 48.84 |  |
| 1 | 13 | 14 | 1020.61 | 8.91 | 31.76 |  |  | 6 | 11 | 15 | 243.87 | 9.16 | 15.17 |  |
| 3 | 13 | 14 | 1024.93 | 8.76 | 31.26 |  |  | 8 | 11 | 15 | 315.02 | 5.67 | 17.01 |  |
| 5 | 13 | 14 | 796.69 | 8.11 | 27.64 |  |  | 10 | 11 | 15 | 848.74 | 13.76 | 28.8 |  |
| 7 | 13 | 14 | 633.92 | 7.29 | 24.81 |  |  | 1 | 12 | 15 | 159.21 | 5.17 | 12.71 |  |
| 9 | 13 | 14 | 499.23 | 7.05 | 21.91 |  |  | 3 | 12 | 15 | 1263.84 | 10.36 | 34.47 |  |
| 11 | 13 | 14 | 420.14 | 7.05 | 19.91 |  |  | 5 | 12 | 15 | 841.68 | 22.94 | 28.47 |  |
| 13 | 13 | 14 | 341.97 | 9.85 | 18.11 |  |  | 7 | 12 | 15 | 436.27 | 6.4 | 20.65 |  |
| 0 | 14 | 14 | 193.63 | 6.87 | 13.34 |  |  | 9 | 12 | 15 | 382.99 | 6.23 | 19.29 |  |

| h | k | l | Fcal^2 | Fobs^2 | (Fobs^2) | |  | h | k | l | Fcal^2 | Fobs^2 | (Fobs^2) | |
| --- | --- | --- | --- | --- | --- | --- | --- | --- | --- | --- | --- | --- | --- | --- |
|  |  |  |  |  |  |  |  |  |  |  |  |  |  |  |
| 11 | 12 | 15 | 328.11 | 8.25 | 18.01 |  |  | 1 | 9 | 16 | 2351.7 | 19.01 | 48.32 |  |
| 0 | 13 | 15 | 1434.05 | 11.43 | 37.23 |  |  | 3 | 9 | 16 | 1018.55 | 9.77 | 31.02 |  |
| 2 | 13 | 15 | 569.32 | 7.08 | 23.99 |  |  | 5 | 9 | 16 | 2629.55 | 17.87 | 50.57 |  |
| 4 | 13 | 15 | 423.96 | 6.64 | 20.3 |  |  | 7 | 9 | 16 | 1966.54 | 13.34 | 43.91 |  |
| 6 | 13 | 15 | 964.89 | 9.17 | 29.89 |  |  | 9 | 9 | 16 | 719.83 | 10.78 | 26.18 |  |
| 8 | 13 | 15 | 952.48 | 9 | 30.02 |  |  | 0 | 10 | 16 | 869.03 | 8.39 | 29.34 |  |
| 10 | 13 | 15 | 242.66 | 6.15 | 15.38 |  |  | 2 | 10 | 16 | 1396.39 | 15.62 | 36.26 |  |
| 12 | 13 | 15 | 528.87 | 7.78 | 22.12 |  |  | 4 | 10 | 16 | 1157.11 | 10.12 | 33.17 |  |
| 1 | 14 | 15 | 246.33 | 5.66 | 15.93 |  |  | 6 | 10 | 16 | 70.37 | 5 | 8.39 |  |
| 3 | 14 | 15 | 617.48 | 7.29 | 24.46 |  |  | 8 | 10 | 16 | 1206.95 | 9.97 | 33.7 |  |
| 5 | 14 | 15 | 1188.11 | 10.22 | 33.3 |  |  | 10 | 10 | 16 | 1036.69 | 13.77 | 31.25 |  |
| 7 | 14 | 15 | 867.54 | 9.63 | 28.34 |  |  | 1 | 11 | 16 | 1549.68 | 11.6 | 38.46 |  |
| 9 | 14 | 15 | 426.08 | 6.87 | 20.36 |  |  | 3 | 11 | 16 | 15.68 | 4.66 | 3.69 |  |
| 11 | 14 | 15 | 257.45 | 6.72 | 15.83 |  |  | 5 | 11 | 16 | 662.33 | 8.01 | 25.38 |  |
| 13 | 14 | 15 | 192.69 | 6.96 | 13.82 |  |  | 7 | 11 | 16 | 1228.13 | 10.37 | 34.34 |  |
| 0 | 15 | 15 | 299.62 | 8.25 | 17.63 |  |  | 9 | 11 | 16 | 520.92 | 7.12 | 22.35 |  |
| 2 | 15 | 15 | 648.17 | 11.23 | 25 |  |  | 11 | 11 | 16 | 262.17 | 9.16 | 16.24 |  |
| 4 | 15 | 15 | 465.34 | 9.62 | 20.89 |  |  | 0 | 12 | 16 | 3832.27 | 23.77 | 60.89 |  |
| 6 | 15 | 15 | 565.33 | 10.77 | 22.54 |  |  | 2 | 12 | 16 | 205.88 | 5.57 | 14.48 |  |
| 8 | 15 | 15 | 747.72 | 11.46 | 26.5 |  |  | 4 | 12 | 16 | 8036.07 | 45.89 | 86.24 |  |
| 10 | 15 | 15 | 703.06 | 12.61 | 25.52 |  |  | 6 | 12 | 16 | 1734.3 | 13.28 | 40.08 |  |
| 12 | 15 | 15 | 187.89 | 9.84 | 13.41 |  |  | 8 | 12 | 16 | 4391.2 | 25.76 | 63.83 |  |
| 14 | 15 | 15 | 346 | 11.45 | 18.59 |  |  | 10 | 12 | 16 | 21.76 | 5.41 | 4.72 |  |
| 0 | 0 | 16 | 16474.56 | 173.11 | 124.75 |  |  | 12 | 12 | 16 | 1608.69 | 18.6 | 38.44 |  |
| 1 | 1 | 16 | 5870.5 | 49.21 | 76.01 |  |  | 1 | 13 | 16 | 267.36 | 6.06 | 16.65 |  |
| 0 | 2 | 16 | 3317.01 | 33.66 | 56.87 |  |  | 3 | 13 | 16 | 573.66 | 7.67 | 23.36 |  |
| 2 | 2 | 16 | 806.4 | 10.32 | 28.47 |  |  | 5 | 13 | 16 | 1780.08 | 20 | 40.43 |  |
| 1 | 3 | 16 | 1035.17 | 8.42 | 32.86 |  |  | 7 | 13 | 16 | 874.7 | 10.32 | 28.29 |  |
| 3 | 3 | 16 | 3053.38 | 28.43 | 55.28 |  |  | 9 | 13 | 16 | 75.74 | 5.47 | 8.59 |  |
| 0 | 4 | 16 | 13340.85 | 108.99 | 113.46 |  |  | 11 | 13 | 16 | 9.95 | 5.58 | 3.78 |  |
| 2 | 4 | 16 | 1180.35 | 10.22 | 34.02 |  |  | 13 | 13 | 16 | 14.8 | 8.7 | 3.09 |  |
| 4 | 4 | 16 | 10916.25 | 89.96 | 102.1 |  |  | 0 | 14 | 16 | 885.26 | 9.23 | 29.08 |  |
| 1 | 5 | 16 | 1318.28 | 10.95 | 36.44 |  |  | 2 | 14 | 16 | 357.85 | 15.35 | 19 |  |
| 3 | 5 | 16 | 1037.52 | 9.82 | 32.16 |  |  | 4 | 14 | 16 | 617.29 | 11.35 | 24.48 |  |
| 5 | 5 | 16 | 419.15 | 8.71 | 21.52 |  |  | 6 | 14 | 16 | 583.74 | 8.02 | 23.51 |  |
| 0 | 6 | 16 | 1548.64 | 23.69 | 39.91 |  |  | 8 | 14 | 16 | 369.33 | 6.76 | 18.47 |  |
| 2 | 6 | 16 | 1908.88 | 14.73 | 43.1 |  |  | 10 | 14 | 16 | 397.54 | 7.53 | 18.95 |  |
| 4 | 6 | 16 | 246.93 | 8.36 | 15.04 |  |  | 12 | 14 | 16 | 226.81 | 7.19 | 15.02 |  |
| 6 | 6 | 16 | 2765.59 | 26.3 | 51.91 |  |  | 14 | 14 | 16 | 476.56 | 11.91 | 21.55 |  |
| 1 | 7 | 16 | 1900.27 | 13.47 | 43.94 |  |  | 1 | 15 | 16 | 527.67 | 7.5 | 22.42 |  |
| 3 | 7 | 16 | 1652.93 | 12.35 | 40.19 |  |  | 3 | 15 | 16 | 485.52 | 7.52 | 21.65 |  |
| 5 | 7 | 16 | 602.68 | 6.85 | 24.55 |  |  | 5 | 15 | 16 | 541.09 | 7.93 | 22.5 |  |
| 7 | 7 | 16 | 850.45 | 11.47 | 28.64 |  |  | 7 | 15 | 16 | 466.16 | 7.59 | 21.05 |  |
| 0 | 8 | 16 | 23811.24 | 121.06 | 147.02 |  |  | 9 | 15 | 16 | 530.02 | 8.18 | 22.33 |  |
| 2 | 8 | 16 | 2636.97 | 17.42 | 50.94 |  |  | 11 | 15 | 16 | 447.25 | 12.83 | 20.55 |  |
| 4 | 8 | 16 | 7108.71 | 40.94 | 82.6 |  |  | 13 | 15 | 16 | 216.38 | 9.62 | 14.87 |  |
| 6 | 8 | 16 | 1077.83 | 9.54 | 32.57 |  |  | 15 | 15 | 16 | 202.29 | 11.45 | 14.37 |  |
| 8 | 8 | 16 | 11786.46 | 83.76 | 105.24 |  |  | 0 | 16 | 16 | 5320.11 | 46.11 | 70 |  |

| h | k | l | Fcal^2 | Fobs^2 | (Fobs^2) | |  | h | k | l | Fcal^2 | Fobs^2 | (Fobs^2) | |
| --- | --- | --- | --- | --- | --- | --- | --- | --- | --- | --- | --- | --- | --- | --- |
|  |  |  |  |  |  |  |  |  |  |  |  |  |  |  |
| 2 | 16 | 16 | 249.33 | 9.16 | 15.79 |  |  | 9 | 12 | 17 | 259.81 | 6.38 | 15.97 |  |
| 4 | 16 | 16 | 2501.88 | 25.55 | 48.03 |  |  | 11 | 12 | 17 | 71.47 | 9.96 | 8.88 |  |
| 6 | 16 | 16 | 507.99 | 11.46 | 21.6 |  |  | 0 | 13 | 17 | 397.05 | 7.9 | 19.14 |  |
| 8 | 16 | 16 | 3417.63 | 30.68 | 56.3 |  |  | 2 | 13 | 17 | 736.64 | 16.05 | 26.58 |  |
| 10 | 16 | 16 | 995.97 | 15.14 | 30.66 |  |  | 4 | 13 | 17 | 600.07 | 12.95 | 24.32 |  |
| 12 | 16 | 16 | 2543.21 | 24.16 | 48.54 |  |  | 6 | 13 | 17 | 297.93 | 7.79 | 17.38 |  |
| 14 | 16 | 16 | 82.2 | 11.44 | 8.99 |  |  | 8 | 13 | 17 | 564.42 | 7.85 | 22.87 |  |
| 16 | 16 | 16 | 1896.97 | 65.27 | 43.63 |  |  | 10 | 13 | 17 | 175.78 | 6.39 | 12.6 |  |
| 0 | 1 | 17 | 508.04 | 10.09 | 22.59 |  |  | 12 | 13 | 17 | 474.48 | 8.09 | 21.01 |  |
| 1 | 2 | 17 | 1785.66 | 20.82 | 42.04 |  |  | 1 | 14 | 17 | 130.8 | 5.7 | 10.98 |  |
| 0 | 3 | 17 | 2202.12 | 15.32 | 45.59 |  |  | 3 | 14 | 17 | 187.67 | 6.09 | 13.1 |  |
| 2 | 3 | 17 | 746.6 | 11.7 | 27.1 |  |  | 5 | 14 | 17 | 1042.47 | 10.32 | 30.96 |  |
| 1 | 4 | 17 | 519.68 | 11.58 | 22.93 |  |  | 7 | 14 | 17 | 938.72 | 22.36 | 29.39 |  |
| 3 | 4 | 17 | 499.2 | 6.64 | 22.18 |  |  | 9 | 14 | 17 | 428.27 | 8.82 | 20.45 |  |
| 0 | 5 | 17 | 3295.13 | 20.57 | 57.23 |  |  | 11 | 14 | 17 | 155.01 | 7.2 | 11.79 |  |
| 2 | 5 | 17 | 710.22 | 8.27 | 26.23 |  |  | 13 | 14 | 17 | 119.48 | 7.04 | 11.1 |  |
| 4 | 5 | 17 | 1985.38 | 20.49 | 44.16 |  |  | 0 | 15 | 17 | 732.55 | 8.82 | 26.09 |  |
| 1 | 6 | 17 | 2340.74 | 16.62 | 48.33 |  |  | 2 | 15 | 17 | 792.2 | 18.92 | 27.14 |  |
| 3 | 6 | 17 | 2678.96 | 18.5 | 51.04 |  |  | 4 | 15 | 17 | 255.4 | 6.68 | 15.46 |  |
| 5 | 6 | 17 | 727.31 | 8.94 | 27.22 |  |  | 6 | 15 | 17 | 277.95 | 6.8 | 16.29 |  |
| 0 | 7 | 17 | 2760.06 | 18.58 | 51.23 |  |  | 8 | 15 | 17 | 245.09 | 7.28 | 15.68 |  |
| 2 | 7 | 17 | 1194.22 | 9.98 | 33.93 |  |  | 10 | 15 | 17 | 235.47 | 7.2 | 15.09 |  |
| 4 | 7 | 17 | 288.26 | 5.5 | 16.9 |  |  | 12 | 15 | 17 | 78.94 | 7.44 | 8.82 |  |
| 6 | 7 | 17 | 1223.52 | 17.11 | 34.26 |  |  | 14 | 15 | 17 | 448.54 | 10.88 | 21.05 |  |
| 1 | 8 | 17 | 2343.69 | 15.59 | 47.12 |  |  | 1 | 16 | 17 | 479.45 | 7.83 | 21.29 |  |
| 3 | 8 | 17 | 1706.78 | 12.82 | 40.51 |  |  | 3 | 16 | 17 | 235.62 | 7.01 | 15.07 |  |
| 5 | 8 | 17 | 1243.71 | 13.9 | 35.07 |  |  | 5 | 16 | 17 | 120.76 | 6.31 | 11.29 |  |
| 7 | 8 | 17 | 839.58 | 8.59 | 28.39 |  |  | 7 | 16 | 17 | 273.38 | 7.44 | 16.61 |  |
| 0 | 9 | 17 | 978.8 | 8.98 | 30.31 |  |  | 9 | 16 | 17 | 548.25 | 11.23 | 22.97 |  |
| 2 | 9 | 17 | 1560.42 | 12.09 | 38.29 |  |  | 11 | 16 | 17 | 579.32 | 9.13 | 23.66 |  |
| 4 | 9 | 17 | 296.87 | 5.48 | 16.37 |  |  | 13 | 16 | 17 | 357.54 | 8.91 | 19.12 |  |
| 6 | 9 | 17 | 1100.24 | 10.2 | 32.56 |  |  | 15 | 16 | 17 | 231.25 | 17.15 | 15.53 |  |
| 8 | 9 | 17 | 801.8 | 8.51 | 27.55 |  |  | 0 | 17 | 17 | 1033.02 | 15.6 | 31.04 |  |
| 1 | 10 | 17 | 1692.21 | 12.81 | 40.04 |  |  | 2 | 17 | 17 | 945.6 | 14.67 | 28.69 |  |
| 3 | 10 | 17 | 137.7 | 8.36 | 11.6 |  |  | 4 | 17 | 17 | 212.45 | 9.39 | 14.07 |  |
| 5 | 10 | 17 | 462.63 | 9.39 | 20.63 |  |  | 6 | 17 | 17 | 122.17 | 10.07 | 11.12 |  |
| 7 | 10 | 17 | 616.19 | 8.82 | 24.25 |  |  | 8 | 17 | 17 | 110.99 | 9.39 | 11.8 |  |
| 9 | 10 | 17 | 543.21 | 7.45 | 22.98 |  |  | 10 | 17 | 17 | 303.95 | 11.45 | 17.81 |  |
| 0 | 11 | 17 | 303.03 | 5.99 | 17.84 |  |  | 12 | 17 | 17 | 27.12 | 10.99 | 5.34 |  |
| 2 | 11 | 17 | 727.06 | 11.46 | 26.05 |  |  | 14 | 17 | 17 | 605.85 | 26.58 | 25.13 |  |
| 4 | 11 | 17 | 1293.77 | 11.2 | 34.56 |  |  | 0 | 0 | 18 | 18.92 | 5.26 | 4.43 |  |
| 6 | 11 | 17 | 139.65 | 5.72 | 11.98 |  |  | 1 | 1 | 18 | 2661.89 | 29.31 | 51.17 |  |
| 8 | 11 | 17 | 895.28 | 8.99 | 29.22 |  |  | 0 | 2 | 18 | 1722.58 | 13.57 | 40.8 |  |
| 10 | 11 | 17 | 853.9 | 14.45 | 28.43 |  |  | 2 | 2 | 18 | 8579.6 | 71.96 | 88.84 |  |
| 1 | 12 | 17 | 219.11 | 5.93 | 15.09 |  |  | 1 | 3 | 18 | 1104.23 | 13.21 | 32.84 |  |
| 3 | 12 | 17 | 1340.36 | 11.53 | 35.39 |  |  | 3 | 3 | 18 | 1703.24 | 20.01 | 39.81 |  |
| 5 | 12 | 17 | 399.24 | 6.64 | 19.88 |  |  | 0 | 4 | 18 | 1517.45 | 11.97 | 37.46 |  |
| 7 | 12 | 17 | 244.11 | 6.64 | 15.02 |  |  | 2 | 4 | 18 | 1270.71 | 11.52 | 34.54 |  |

| h | k | l | Fcal^2 | Fobs^2 | (Fobs^2) | |  | h | k | l | Fcal^2 | Fobs^2 | (Fobs^2) | |
| --- | --- | --- | --- | --- | --- | --- | --- | --- | --- | --- | --- | --- | --- | --- |
|  |  |  |  |  |  |  |  |  |  |  |  |  |  |  |
| 4 | 4 | 18 | 1098.84 | 14 | 33.23 |  |  | 0 | 14 | 18 | 29.94 | 5.7 | 5.41 |  |
| 1 | 5 | 18 | 1218.69 | 17.46 | 35.66 |  |  | 2 | 14 | 18 | 3734.09 | 57.26 | 58.56 |  |
| 3 | 5 | 18 | 1239.04 | 14.35 | 34.41 |  |  | 4 | 14 | 18 | 524.07 | 15.01 | 22.06 |  |
| 5 | 5 | 18 | 1796.62 | 20.93 | 40.75 |  |  | 6 | 14 | 18 | 2917.79 | 53.8 | 51.99 |  |
| 0 | 6 | 18 | 343.67 | 5.77 | 19.44 |  |  | 8 | 14 | 18 | 590.15 | 19.02 | 24 |  |
| 2 | 6 | 18 | 10361.75 | 58.05 | 98.58 |  |  | 10 | 14 | 18 | 1957.65 | 45.74 | 42.52 |  |
| 4 | 6 | 18 | 1510.7 | 12.27 | 38.13 |  |  | 12 | 14 | 18 | 187.94 | 7.75 | 13.75 |  |
| 6 | 6 | 18 | 6278.06 | 53.52 | 76.98 |  |  | 14 | 14 | 18 | 1903.64 | 20.68 | 43.03 |  |
| 1 | 7 | 18 | 1375.35 | 11.61 | 36.45 |  |  | 1 | 15 | 18 | 449.43 | 12.94 | 20.75 |  |
| 3 | 7 | 18 | 396.59 | 6.71 | 19.73 |  |  | 3 | 15 | 18 | 309.7 | 12.82 | 17.38 |  |
| 5 | 7 | 18 | 796.8 | 9.08 | 28.06 |  |  | 5 | 15 | 18 | 304.16 | 10.88 | 17.19 |  |
| 7 | 7 | 18 | 910.01 | 13.76 | 29.38 |  |  | 7 | 15 | 18 | 384.98 | 8.19 | 19.52 |  |
| 0 | 8 | 18 | 2274.96 | 15.8 | 46.02 |  |  | 9 | 15 | 18 | 367.99 | 14.77 | 18.93 |  |
| 2 | 8 | 18 | 726.57 | 7.67 | 26.13 |  |  | 11 | 15 | 18 | 375.2 | 8.26 | 19.05 |  |
| 4 | 8 | 18 | 585.65 | 7.7 | 23.49 |  |  | 13 | 15 | 18 | 213.45 | 8.74 | 14.81 |  |
| 6 | 8 | 18 | 774.23 | 8.59 | 27.31 |  |  | 15 | 15 | 18 | 94.7 | 23.58 | 9.88 |  |
| 8 | 8 | 18 | 418.91 | 10.08 | 20.51 |  |  | 0 | 16 | 18 | 1168.95 | 11.09 | 32.74 |  |
| 1 | 9 | 18 | 857.47 | 8.6 | 28.01 |  |  | 2 | 16 | 18 | 667.89 | 8.8 | 24.94 |  |
| 3 | 9 | 18 | 550.47 | 7.08 | 22.78 |  |  | 4 | 16 | 18 | 152.16 | 7.78 | 11.8 |  |
| 5 | 9 | 18 | 501.65 | 7.08 | 22.61 |  |  | 6 | 16 | 18 | 47.21 | 6.93 | 7.25 |  |
| 7 | 9 | 18 | 536.85 | 7.99 | 22.74 |  |  | 8 | 16 | 18 | 146.15 | 7.35 | 12.25 |  |
| 9 | 9 | 18 | 519.18 | 11.23 | 21.72 |  |  | 10 | 16 | 18 | 89.05 | 7.44 | 9.63 |  |
| 0 | 10 | 18 | 1944.13 | 20.24 | 42.62 |  |  | 12 | 16 | 18 | 90.45 | 12.36 | 10.09 |  |
| 2 | 10 | 18 | 6352.26 | 35.95 | 76.6 |  |  | 14 | 16 | 18 | 163.56 | 16.17 | 14.12 |  |
| 4 | 10 | 18 | 532.11 | 7.34 | 22.7 |  |  | 1 | 17 | 18 | 284 | 7.93 | 16.53 |  |
| 6 | 10 | 18 | 4666.97 | 29.19 | 66.43 |  |  | 3 | 17 | 18 | 174.27 | 7.85 | 13.29 |  |
| 8 | 10 | 18 | 239.28 | 6.3 | 15.5 |  |  | 5 | 17 | 18 | 260.22 | 8.24 | 16.25 |  |
| 10 | 10 | 18 | 4560.74 | 39.08 | 64.86 |  |  | 7 | 17 | 18 | 281.16 | 18.78 | 17.47 |  |
| 1 | 11 | 18 | 470.45 | 7.04 | 21.94 |  |  | 9 | 17 | 18 | 165.1 | 9.5 | 13.01 |  |
| 3 | 11 | 18 | 1526.8 | 14.01 | 37.51 |  |  | 11 | 17 | 18 | 57 | 9.35 | 7.49 |  |
| 5 | 11 | 18 | 834.22 | 9.08 | 28.12 |  |  | 13 | 17 | 18 | 16.59 | 16.56 | 4.91 |  |
| 7 | 11 | 18 | 1017.95 | 9.99 | 31.16 |  |  | 0 | 18 | 18 | 5.98 | 9.84 | 3.32 |  |
| 9 | 11 | 18 | 384.29 | 6.87 | 19.2 |  |  | 2 | 18 | 18 | 1971.18 | 21.83 | 43.22 |  |
| 11 | 11 | 18 | 0.84 | 7.55 | 0.91 |  |  | 4 | 18 | 18 | 431.53 | 13.06 | 20.66 |  |
| 0 | 12 | 18 | 44.24 | 5.95 | 6.76 |  |  | 6 | 18 | 18 | 1828.64 | 21.6 | 42.58 |  |
| 2 | 12 | 18 | 685.33 | 10.09 | 25.2 |  |  | 8 | 18 | 18 | 209.66 | 14.2 | 14.41 |  |
| 4 | 12 | 18 | 527.31 | 7.5 | 22.25 |  |  | 10 | 18 | 18 | 736.73 | 17.42 | 27.74 |  |
| 6 | 12 | 18 | 516.95 | 10.08 | 22.21 |  |  | 12 | 18 | 18 | 45.52 | 26.32 | 7.34 |  |
| 8 | 12 | 18 | 561.75 | 17.07 | 23.08 |  |  | 14 | 18 | 18 | 746.32 | 61.24 | 32.74 |  |
| 10 | 12 | 18 | 493.41 | 8.09 | 21.46 |  |  | 0 | 1 | 19 | 559.23 | 18.91 | 23.59 |  |
| 12 | 12 | 18 | 219.27 | 9.85 | 14.65 |  |  | 1 | 2 | 19 | 533.82 | 7.12 | 22.63 |  |
| 1 | 13 | 18 | 185.57 | 6.36 | 13.34 |  |  | 0 | 3 | 19 | 2.86 | 4.81 | 1.49 |  |
| 3 | 13 | 18 | 1297.07 | 22.73 | 34.58 |  |  | 2 | 3 | 19 | 1175.79 | 10.9 | 33.53 |  |
| 5 | 13 | 18 | 360.05 | 9.74 | 18.56 |  |  | 1 | 4 | 19 | 1800.6 | 18.74 | 41.48 |  |
| 7 | 13 | 18 | 193.59 | 6.65 | 13.82 |  |  | 3 | 4 | 19 | 1930.38 | 14.23 | 42.67 |  |
| 9 | 13 | 18 | 356.38 | 9.28 | 18.57 |  |  | 0 | 5 | 19 | 796.58 | 8.29 | 27.66 |  |
| 11 | 13 | 18 | 305.85 | 7.77 | 17.1 |  |  | 2 | 5 | 19 | 1694.9 | 13.17 | 39.71 |  |
| 13 | 13 | 18 | 754.34 | 14.21 | 26.67 |  |  | 4 | 5 | 19 | 401.22 | 8.93 | 19.44 |  |

| h | k | l | Fcal^2 | Fobs^2 | (Fobs^2) | |  | h | k | l | Fcal^2 | Fobs^2 | (Fobs^2) | |
| --- | --- | --- | --- | --- | --- | --- | --- | --- | --- | --- | --- | --- | --- | --- |
|  |  |  |  |  |  |  |  |  |  |  |  |  |  |  |
| 1 | 6 | 19 | 454.6 | 6.75 | 21.23 |  |  | 2 | 15 | 19 | 465.43 | 8.28 | 20.68 |  |
| 3 | 6 | 19 | 797.94 | 8.59 | 27.77 |  |  | 4 | 15 | 19 | 39.08 | 6.55 | 4.99 |  |
| 5 | 6 | 19 | 573.23 | 7.91 | 23.63 |  |  | 6 | 15 | 19 | 357.32 | 8.01 | 18.69 |  |
| 0 | 7 | 19 | 1356.77 | 11.93 | 35 |  |  | 8 | 15 | 19 | 239.66 | 8.7 | 15.23 |  |
| 2 | 7 | 19 | 1102.55 | 10.53 | 31.95 |  |  | 10 | 15 | 19 | 0.96 | 7.1 | 2.39 |  |
| 4 | 7 | 19 | 494.73 | 7.36 | 22.44 |  |  | 12 | 15 | 19 | 281.79 | 10.44 | 17.57 |  |
| 6 | 7 | 19 | 471.48 | 7.77 | 21.27 |  |  | 14 | 15 | 19 | 156.89 | 15.72 | 13.66 |  |
| 1 | 8 | 19 | 1333.51 | 11.6 | 35.42 |  |  | 1 | 16 | 19 | 206.99 | 7.1 | 14.59 |  |
| 3 | 8 | 19 | 306.16 | 6.45 | 16.61 |  |  | 3 | 16 | 19 | 122.65 | 9.39 | 11.21 |  |
| 5 | 8 | 19 | 540.72 | 7.94 | 22.92 |  |  | 5 | 16 | 19 | 444.13 | 8.75 | 20.75 |  |
| 7 | 8 | 19 | 332.13 | 13.05 | 18.09 |  |  | 7 | 16 | 19 | 359.59 | 8.5 | 19.24 |  |
| 0 | 9 | 19 | 482.68 | 18.67 | 20.89 |  |  | 9 | 16 | 19 | 82.65 | 7.91 | 9.59 |  |
| 2 | 9 | 19 | 324.55 | 10.19 | 17.55 |  |  | 11 | 16 | 19 | 3.93 | 9.64 | 2.47 |  |
| 4 | 9 | 19 | 861.75 | 9.41 | 29.08 |  |  | 13 | 16 | 19 | 15.6 | 14.66 | 3.85 |  |
| 6 | 9 | 19 | 622.7 | 12.95 | 23.83 |  |  | 0 | 17 | 19 | 586.17 | 9.72 | 23.61 |  |
| 8 | 9 | 19 | 386.69 | 7.61 | 19.39 |  |  | 2 | 17 | 19 | 273.52 | 8.41 | 16.19 |  |
| 1 | 10 | 19 | 956.07 | 19.73 | 29.51 |  |  | 4 | 17 | 19 | 45.39 | 7.51 | 7.56 |  |
| 3 | 10 | 19 | 931.47 | 9.53 | 30.17 |  |  | 6 | 17 | 19 | 175.8 | 8.49 | 13.93 |  |
| 5 | 10 | 19 | 521.81 | 7.68 | 22.26 |  |  | 8 | 17 | 19 | 148.49 | 9.47 | 12.37 |  |
| 7 | 10 | 19 | 148.85 | 6.58 | 11.98 |  |  | 10 | 17 | 19 | 14.39 | 10.1 | 5.05 |  |
| 9 | 10 | 19 | 278.33 | 6.96 | 16.75 |  |  | 12 | 17 | 19 | 133.57 | 17 | 13.56 |  |
| 0 | 11 | 19 | 124.54 | 5.38 | 10.76 |  |  | 14 | 17 | 19 | 117.04 | 82.64 | 11.51 |  |
| 2 | 11 | 19 | 201.36 | 6.75 | 14.35 |  |  | 1 | 18 | 19 | 74.13 | 7.69 | 8.84 |  |
| 4 | 11 | 19 | 834.79 | 16.97 | 27.86 |  |  | 3 | 18 | 19 | 269.5 | 8.5 | 16.71 |  |
| 6 | 11 | 19 | 553.92 | 8.15 | 22.66 |  |  | 5 | 18 | 19 | 225.58 | 9.79 | 15.2 |  |
| 8 | 11 | 19 | 559.73 | 8.94 | 23.47 |  |  | 7 | 18 | 19 | 111.73 | 9.95 | 10.96 |  |
| 10 | 11 | 19 | 891.15 | 10.21 | 28.53 |  |  | 9 | 18 | 19 | 53.91 | 11.38 | 8.62 |  |
| 1 | 12 | 19 | 94.41 | 5.8 | 9.78 |  |  | 11 | 18 | 19 | 57.11 | 20.4 | 10.01 |  |
| 3 | 12 | 19 | 749.92 | 12.95 | 26.24 |  |  | 13 | 18 | 19 | 123.3 | 35.01 | 14.34 |  |
| 5 | 12 | 19 | 354.13 | 18.32 | 18.23 |  |  | 0 | 19 | 19 | 3.61 | 12.13 | 0.76 |  |
| 7 | 12 | 19 | 675.46 | 9.13 | 25.06 |  |  | 2 | 19 | 19 | 108.25 | 13.73 | 10.48 |  |
| 9 | 12 | 19 | 583.72 | 10.31 | 23.26 |  |  | 4 | 19 | 19 | 272.57 | 14.66 | 17.68 |  |
| 11 | 12 | 19 | 93.17 | 7.36 | 9.22 |  |  | 6 | 19 | 19 | 295.31 | 15.57 | 18.04 |  |
| 0 | 13 | 19 | 242.58 | 6.94 | 14.66 |  |  | 8 | 19 | 19 | 37.52 | 22.66 | 8.2 |  |
| 2 | 13 | 19 | 353.22 | 11.34 | 18.06 |  |  | 10 | 19 | 19 | 112.92 | 37.77 | 12.21 |  |
| 4 | 13 | 19 | 561.56 | 8.48 | 22.93 |  |  | 12 | 19 | 19 | 132.55 | 62.51 | 16.35 |  |
| 6 | 13 | 19 | 471.31 | 11.34 | 21.34 |  |  | 0 | 0 | 20 | 5187.89 | 73.55 | 70.18 |  |
| 8 | 13 | 19 | 56.38 | 6.38 | 7.13 |  |  | 1 | 1 | 20 | 265.68 | 9.16 | 15.97 |  |
| 10 | 13 | 19 | 292.15 | 7.93 | 16.66 |  |  | 0 | 2 | 20 | 278.99 | 12.25 | 16.61 |  |
| 12 | 13 | 19 | 378.82 | 17.41 | 19.3 |  |  | 2 | 2 | 20 | 1178.16 | 14.92 | 33.38 |  |
| 1 | 14 | 19 | 521.38 | 8.66 | 22.1 |  |  | 1 | 3 | 20 | 995.56 | 10.46 | 30.69 |  |
| 3 | 14 | 19 | 225.51 | 7.17 | 14.71 |  |  | 3 | 3 | 20 | 479.26 | 10.77 | 21.03 |  |
| 5 | 14 | 19 | 222.18 | 9.62 | 14.78 |  |  | 0 | 4 | 20 | 5609.76 | 40.98 | 72.39 |  |
| 7 | 14 | 19 | 373.14 | 7.85 | 19.03 |  |  | 2 | 4 | 20 | 994.67 | 14.8 | 30.49 |  |
| 9 | 14 | 19 | 252.36 | 8.47 | 15.78 |  |  | 4 | 4 | 20 | 9870.48 | 77.54 | 94.95 |  |
| 11 | 14 | 19 | 209 | 8.15 | 14.97 |  |  | 1 | 5 | 20 | 620.83 | 8.08 | 24.19 |  |
| 13 | 14 | 19 | 123.94 | 9.55 | 11.74 |  |  | 3 | 5 | 20 | 1471.26 | 12.89 | 37.11 |  |
| 0 | 15 | 19 | 1577.19 | 13.3 | 37.53 |  |  | 5 | 5 | 20 | 2210.47 | 23.01 | 46.04 |  |

| h | k | l | Fcal^2 | Fobs^2 | (Fobs^2) | |  | h | k | l | Fcal^2 | Fobs^2 | (Fobs^2) | |
| --- | --- | --- | --- | --- | --- | --- | --- | --- | --- | --- | --- | --- | --- | --- |
|  |  |  |  |  |  |  |  |  |  |  |  |  |  |  |
| 0 | 6 | 20 | 670.9 | 8.01 | 24.69 |  |  | 8 | 14 | 20 | 164.94 | 7.75 | 13.46 |  |
| 2 | 6 | 20 | 825.27 | 8.99 | 27.37 |  |  | 10 | 14 | 20 | 31.78 | 7.93 | 6.11 |  |
| 4 | 6 | 20 | 1422.3 | 12.51 | 36.94 |  |  | 12 | 14 | 20 | 374.88 | 12.33 | 19.33 |  |
| 6 | 6 | 20 | 122.31 | 8.24 | 10.71 |  |  | 14 | 14 | 20 | 123.63 | 19.69 | 12.51 |  |
| 1 | 7 | 20 | 158.21 | 5.5 | 12.76 |  |  | 1 | 15 | 20 | 96.66 | 6.84 | 9.32 |  |
| 3 | 7 | 20 | 1078.98 | 12.96 | 31.83 |  |  | 3 | 15 | 20 | 488.8 | 8.67 | 21.63 |  |
| 5 | 7 | 20 | 631.67 | 8.41 | 24.47 |  |  | 5 | 15 | 20 | 204.19 | 7.68 | 14.41 |  |
| 7 | 7 | 20 | 469.34 | 11.69 | 20.93 |  |  | 7 | 15 | 20 | 117.68 | 7.36 | 11.16 |  |
| 0 | 8 | 20 | 4737.53 | 29.21 | 65.5 |  |  | 9 | 15 | 20 | 67.73 | 8.11 | 8.35 |  |
| 2 | 8 | 20 | 397.44 | 11.8 | 19.24 |  |  | 11 | 15 | 20 | 83.16 | 11.34 | 9.99 |  |
| 4 | 8 | 20 | 4223.86 | 29.08 | 62.99 |  |  | 13 | 15 | 20 | 130.36 | 15.22 | 12.97 |  |
| 6 | 8 | 20 | 161.64 | 6.55 | 12.45 |  |  | 15 | 15 | 20 | 56.88 | 60.65 | 4.72 |  |
| 8 | 8 | 20 | 2438.04 | 26 | 47.66 |  |  | 0 | 16 | 20 | 1986.56 | 15.99 | 43.01 |  |
| 1 | 9 | 20 | 257.54 | 6.54 | 15.22 |  |  | 2 | 16 | 20 | 97.51 | 7.35 | 10.13 |  |
| 3 | 9 | 20 | 603.43 | 8.42 | 24.03 |  |  | 4 | 16 | 20 | 1735.35 | 14.68 | 41.11 |  |
| 5 | 9 | 20 | 263.01 | 6.63 | 16.02 |  |  | 6 | 16 | 20 | 309.05 | 9 | 17.87 |  |
| 7 | 9 | 20 | 144.2 | 6.58 | 11.89 |  |  | 8 | 16 | 20 | 874.28 | 11.59 | 29.74 |  |
| 9 | 9 | 20 | 684.41 | 12.61 | 26.14 |  |  | 10 | 16 | 20 | 15.4 | 11.88 | 5.69 |  |
| 0 | 10 | 20 | 165.71 | 6.16 | 12.79 |  |  | 12 | 16 | 20 | 549.98 | 18.32 | 24.83 |  |
| 2 | 10 | 20 | 367.71 | 6.94 | 18.72 |  |  | 1 | 17 | 20 | 41.73 | 7.75 | 6.23 |  |
| 4 | 10 | 20 | 386.37 | 7.77 | 18.9 |  |  | 3 | 17 | 20 | 429.11 | 9.23 | 21.04 |  |
| 6 | 10 | 20 | 852.86 | 10.04 | 28.24 |  |  | 5 | 17 | 20 | 229.58 | 10.44 | 15.42 |  |
| 8 | 10 | 20 | 639.91 | 8.8 | 24.71 |  |  | 7 | 17 | 20 | 39.89 | 9.22 | 6.96 |  |
| 10 | 10 | 20 | 417.19 | 11.45 | 20.05 |  |  | 9 | 17 | 20 | 21.83 | 13.62 | 4.05 |  |
| 1 | 11 | 20 | 885.59 | 27.87 | 28.57 |  |  | 11 | 17 | 20 | 32.54 | 19.05 | 5.69 |  |
| 3 | 11 | 20 | 482.74 | 7.99 | 21.21 |  |  | 13 | 17 | 20 | 119.47 | 50.98 | 12.29 |  |
| 5 | 11 | 20 | 460.72 | 8.09 | 20.23 |  |  | 0 | 18 | 20 | 47.74 | 8.58 | 7.16 |  |
| 7 | 11 | 20 | 84.2 | 6.77 | 8.92 |  |  | 2 | 18 | 20 | 72.01 | 9.86 | 8.94 |  |
| 9 | 11 | 20 | 343.82 | 18.09 | 18.6 |  |  | 4 | 18 | 20 | 309.85 | 10.77 | 18.15 |  |
| 11 | 11 | 20 | 969.31 | 15.6 | 30.3 |  |  | 6 | 18 | 20 | 196.98 | 11.65 | 15.18 |  |
| 0 | 12 | 20 | 2516.17 | 69.28 | 48.01 |  |  | 8 | 18 | 20 | 68.08 | 15.5 | 9.92 |  |
| 2 | 12 | 20 | 932.27 | 11.93 | 29.69 |  |  | 10 | 18 | 20 | 80.61 | 27.56 | 10.96 |  |
| 4 | 12 | 20 | 3807.21 | 57.01 | 59.05 |  |  | 12 | 18 | 20 | 38.48 | 62.95 | 11.51 |  |
| 6 | 12 | 20 | 220.59 | 7.33 | 14.62 |  |  | 1 | 19 | 20 | 134.27 | 12.61 | 12.96 |  |
| 8 | 12 | 20 | 2812.52 | 35.01 | 51.28 |  |  | 3 | 19 | 20 | 134.42 | 16.16 | 13.1 |  |
| 10 | 12 | 20 | 321.39 | 8.66 | 17.45 |  |  | 5 | 19 | 20 | 93.26 | 15.15 | 11.24 |  |
| 12 | 12 | 20 | 2597.71 | 27.16 | 50.17 |  |  | 7 | 19 | 20 | 98.41 | 24.98 | 12.55 |  |
| 1 | 13 | 20 | 766.48 | 9.55 | 26.56 |  |  | 9 | 19 | 20 | 76.56 | 54.94 | 11.16 |  |
| 3 | 13 | 20 | 175.98 | 13.97 | 13.02 |  |  | 0 | 20 | 20 | 769.11 | 36.91 | 29.3 |  |
| 5 | 13 | 20 | 189.57 | 6.94 | 13.57 |  |  | 2 | 20 | 20 | 237.3 | 30.91 | 16.99 |  |
| 7 | 13 | 20 | 345.47 | 8.02 | 18.54 |  |  | 4 | 20 | 20 | 860.2 | 43.58 | 32.08 |  |
| 9 | 13 | 20 | 555.47 | 9.56 | 23.19 |  |  | 6 | 20 | 20 | 117.5 | 43.72 | 9.49 |  |
| 11 | 13 | 20 | 480.52 | 10.54 | 21.77 |  |  | 8 | 20 | 20 | 567.36 | 103.62 | 29.13 |  |
| 13 | 13 | 20 | 188.88 | 15.8 | 14.25 |  |  | 0 | 1 | 21 | 938.68 | 11.41 | 29.69 |  |
| 0 | 14 | 20 | 408.07 | 8.18 | 18.97 |  |  | 1 | 2 | 21 | 789.72 | 9.48 | 27.28 |  |
| 2 | 14 | 20 | 290.08 | 7.61 | 16.36 |  |  | 0 | 3 | 21 | 553.18 | 8.75 | 22.58 |  |
| 4 | 14 | 20 | 442.23 | 8.08 | 20.61 |  |  | 2 | 3 | 21 | 493.25 | 7.37 | 21.64 |  |
| 6 | 14 | 20 | 399.68 | 8.1 | 20.23 |  |  | 1 | 4 | 21 | 485.4 | 11.8 | 21.61 |  |

| h | k | l | Fcal^2 | Fobs^2 | (Fobs^2) | |  | h | k | l | Fcal^2 | Fobs^2 | (Fobs^2) | |
| --- | --- | --- | --- | --- | --- | --- | --- | --- | --- | --- | --- | --- | --- | --- |
|  |  |  |  |  |  |  |  |  |  |  |  |  |  |  |
| 3 | 4 | 21 | 971.36 | 10.06 | 30 |  |  | 9 | 14 | 21 | 93.61 | 9.06 | 9.67 |  |
| 0 | 5 | 21 | 191.69 | 6.31 | 12.99 |  |  | 11 | 14 | 21 | 33.94 | 11.4 | 7.48 |  |
| 2 | 5 | 21 | 891.91 | 9.57 | 28.82 |  |  | 13 | 14 | 21 | 105.75 | 17.08 | 11.92 |  |
| 4 | 5 | 21 | 694.91 | 8.75 | 25.41 |  |  | 0 | 15 | 21 | 85.07 | 7.2 | 8.9 |  |
| 1 | 6 | 21 | 280.69 | 6.54 | 16.38 |  |  | 2 | 15 | 21 | 138.72 | 7.45 | 11.67 |  |
| 3 | 6 | 21 | 818.64 | 13.87 | 27.58 |  |  | 4 | 15 | 21 | 510.4 | 9.15 | 22.56 |  |
| 5 | 6 | 21 | 479.14 | 7.94 | 21.18 |  |  | 6 | 15 | 21 | 55 | 7.6 | 8.07 |  |
| 0 | 7 | 21 | 564.9 | 7.96 | 22.46 |  |  | 8 | 15 | 21 | 73.19 | 10.23 | 8.89 |  |
| 2 | 7 | 21 | 377.62 | 7.2 | 18.72 |  |  | 10 | 15 | 21 | 165.48 | 13.16 | 13.9 |  |
| 4 | 7 | 21 | 1156.07 | 11.44 | 33.06 |  |  | 12 | 15 | 21 | 85.3 | 16.25 | 11.2 |  |
| 6 | 7 | 21 | 168.51 | 6.55 | 13.02 |  |  | 14 | 15 | 21 | 0 | 0.69 | 5.43 |  |
| 1 | 8 | 21 | 552.51 | 8.26 | 22.69 |  |  | 1 | 16 | 21 | 360 | 14.2 | 18.78 |  |
| 3 | 8 | 21 | 32.35 | 5.77 | 5.83 |  |  | 3 | 16 | 21 | 0 | 7.75 | 0.16 |  |
| 5 | 8 | 21 | 25.62 | 6.47 | 5.02 |  |  | 5 | 16 | 21 | 79.74 | 8.82 | 9.17 |  |
| 7 | 8 | 21 | 223.67 | 7.03 | 14.64 |  |  | 7 | 16 | 21 | 148.85 | 10.71 | 12.79 |  |
| 0 | 9 | 21 | 481.49 | 8.25 | 21.73 |  |  | 9 | 16 | 21 | 117.19 | 14.52 | 11.73 |  |
| 2 | 9 | 21 | 296.74 | 6.85 | 17.21 |  |  | 11 | 16 | 21 | 39.01 | 16.24 | 7.47 |  |
| 4 | 9 | 21 | 770.34 | 9.81 | 26.62 |  |  | 13 | 16 | 21 | 11.36 | 63.16 | 0.62 |  |
| 6 | 9 | 21 | 222.67 | 7.52 | 14.39 |  |  | 0 | 17 | 21 | 80.65 | 13.5 | 8.76 |  |
| 8 | 9 | 21 | 481.96 | 8.57 | 21.32 |  |  | 2 | 17 | 21 | 118.96 | 10.33 | 11.85 |  |
| 1 | 10 | 21 | 242.71 | 6.91 | 14.95 |  |  | 4 | 17 | 21 | 241.83 | 12.81 | 16.58 |  |
| 3 | 10 | 21 | 286.63 | 7.37 | 16.53 |  |  | 6 | 17 | 21 | 49 | 11.36 | 7.86 |  |
| 5 | 10 | 21 | 479.72 | 8.66 | 21.45 |  |  | 8 | 17 | 21 | 130.44 | 16.25 | 12.63 |  |
| 7 | 10 | 21 | 426.07 | 8.58 | 20.34 |  |  | 10 | 17 | 21 | 91.32 | 43.59 | 9.97 |  |
| 9 | 10 | 21 | 347.72 | 8.1 | 18.4 |  |  | 1 | 18 | 21 | 100.11 | 16.36 | 11.56 |  |
| 0 | 11 | 21 | 13.5 | 6.09 | 3.66 |  |  | 3 | 18 | 21 | 318.47 | 17.49 | 18.37 |  |
| 2 | 11 | 21 | 509.93 | 8.17 | 21.94 |  |  | 5 | 18 | 21 | 130.25 | 16.37 | 13.31 |  |
| 4 | 11 | 21 | 115.58 | 6.8 | 10.45 |  |  | 7 | 18 | 21 | 174.65 | 33.06 | 15.93 |  |
| 6 | 11 | 21 | 493.69 | 8.66 | 22.04 |  |  | 0 | 19 | 21 | 40.87 | 24.44 | 6.63 |  |
| 8 | 11 | 21 | 399.42 | 9.51 | 19.97 |  |  | 2 | 19 | 21 | 42.8 | 19.86 | 7.49 |  |
| 10 | 11 | 21 | 271.51 | 8.58 | 16.25 |  |  | 4 | 19 | 21 | 93.69 | 21.56 | 12.4 |  |
| 1 | 12 | 21 | 395.31 | 7.75 | 19.3 |  |  | 6 | 19 | 21 | 80.91 | 30.1 | 10.94 |  |
| 3 | 12 | 21 | 644.4 | 9.23 | 24.48 |  |  | 8 | 19 | 21 | 38.81 | 42.34 | 9.05 |  |
| 5 | 12 | 21 | 553.72 | 9.07 | 23.2 |  |  | 1 | 20 | 21 | 93.53 | 35.81 | 13.39 |  |
| 7 | 12 | 21 | 365.83 | 8.45 | 18.72 |  |  | 3 | 20 | 21 | 105.75 | 44.06 | 11.17 |  |
| 9 | 12 | 21 | 174.6 | 7.85 | 12.95 |  |  | 5 | 20 | 21 | 31.22 | 50.8 | 8.89 |  |
| 11 | 12 | 21 | 141.08 | 8.65 | 12.42 |  |  | 0 | 0 | 22 | 3696.42 | 56.11 | 58.67 |  |
| 0 | 13 | 21 | 17.55 | 6.7 | 4.24 |  |  | 1 | 1 | 22 | 53.18 | 10.07 | 5.65 |  |
| 2 | 13 | 21 | 201.72 | 8.59 | 13.84 |  |  | 0 | 2 | 22 | 125.23 | 6.38 | 11.18 |  |
| 4 | 13 | 21 | 559.09 | 19.48 | 23.28 |  |  | 2 | 2 | 22 | 4478.93 | 41.4 | 64.47 |  |
| 6 | 13 | 21 | 383.57 | 10.65 | 20.46 |  |  | 1 | 3 | 22 | 702.09 | 9.22 | 26.22 |  |
| 8 | 13 | 21 | 69.81 | 7.51 | 8.17 |  |  | 3 | 3 | 22 | 690.5 | 12.61 | 25.51 |  |
| 10 | 13 | 21 | 429.1 | 10.88 | 21.05 |  |  | 0 | 4 | 22 | 58.09 | 6.32 | 7.5 |  |
| 12 | 13 | 21 | 196.41 | 13.03 | 14.4 |  |  | 2 | 4 | 22 | 729.48 | 9.64 | 26.22 |  |
| 1 | 14 | 21 | 133.94 | 6.95 | 11.31 |  |  | 4 | 4 | 22 | 981.54 | 15.14 | 29.76 |  |
| 3 | 14 | 21 | 590.36 | 9.4 | 24.03 |  |  | 1 | 5 | 22 | 446.66 | 7.93 | 20.18 |  |
| 5 | 14 | 21 | 241.85 | 8.25 | 15.46 |  |  | 3 | 5 | 22 | 397.16 | 7.53 | 19.34 |  |
| 7 | 14 | 21 | 354.04 | 8.74 | 18.77 |  |  | 5 | 5 | 22 | 499.62 | 11.68 | 21.71 |  |

| h | k | l | Fcal^2 | Fobs^2 | (Fobs^2) | |  | h | k | l | Fcal^2 | Fobs^2 | (Fobs^2) | |
| --- | --- | --- | --- | --- | --- | --- | --- | --- | --- | --- | --- | --- | --- | --- |
|  |  |  |  |  |  |  |  |  |  |  |  |  |  |  |
| 0 | 6 | 22 | 943.62 | 10.14 | 29.76 |  |  | 8 | 14 | 22 | 97.71 | 10.39 | 10.28 |  |
| 2 | 6 | 22 | 4195.97 | 27.53 | 61.63 |  |  | 10 | 14 | 22 | 1146.34 | 15.66 | 35.45 |  |
| 4 | 6 | 22 | 170.8 | 6.88 | 12.88 |  |  | 12 | 14 | 22 | 63.43 | 19.88 | 10.07 |  |
| 6 | 6 | 22 | 2467.13 | 25.54 | 48.36 |  |  | 1 | 15 | 22 | 422.22 | 9.45 | 20.28 |  |
| 1 | 7 | 22 | 849.57 | 9.48 | 28.01 |  |  | 3 | 15 | 22 | 54.67 | 8.49 | 8.65 |  |
| 3 | 7 | 22 | 494.81 | 8.5 | 21.66 |  |  | 5 | 15 | 22 | 250.06 | 21.87 | 16.34 |  |
| 5 | 7 | 22 | 392 | 10.77 | 19.48 |  |  | 7 | 15 | 22 | 126.88 | 11.68 | 11.97 |  |
| 7 | 7 | 22 | 277.46 | 10.99 | 17.01 |  |  | 9 | 15 | 22 | 65.54 | 14.57 | 9.05 |  |
| 0 | 8 | 22 | 188.81 | 6.53 | 13.96 |  |  | 11 | 15 | 22 | 82.37 | 17.05 | 10.95 |  |
| 2 | 8 | 22 | 687.53 | 14.9 | 25.36 |  |  | 0 | 16 | 22 | 0 | 11.18 | 1.1 |  |
| 4 | 8 | 22 | 128.03 | 7.33 | 11.14 |  |  | 2 | 16 | 22 | 165.26 | 11.21 | 13.82 |  |
| 6 | 8 | 22 | 448.38 | 9.14 | 20.36 |  |  | 4 | 16 | 22 | 133.2 | 12.36 | 12.68 |  |
| 8 | 8 | 22 | 348.07 | 12.14 | 17.71 |  |  | 6 | 16 | 22 | 59.67 | 12.36 | 9.65 |  |
| 1 | 9 | 22 | 512.95 | 13.86 | 22.34 |  |  | 8 | 16 | 22 | 187.78 | 19.81 | 14.93 |  |
| 3 | 9 | 22 | 565.51 | 12.6 | 23.31 |  |  | 10 | 16 | 22 | 81.49 | 23.8 | 14.1 |  |
| 5 | 9 | 22 | 204.94 | 7.44 | 13.9 |  |  | 1 | 17 | 22 | 270.52 | 17.62 | 17.28 |  |
| 7 | 9 | 22 | 556.2 | 9.31 | 23.26 |  |  | 3 | 17 | 22 | 74.93 | 16.23 | 9.99 |  |
| 9 | 9 | 22 | 402.95 | 12.37 | 19.66 |  |  | 5 | 17 | 22 | 81.72 | 19.61 | 10.09 |  |
| 0 | 10 | 22 | 57.72 | 6.05 | 6.8 |  |  | 7 | 17 | 22 | 54.13 | 46 | 8.48 |  |
| 2 | 10 | 22 | 2041.84 | 16.58 | 43.52 |  |  | 0 | 18 | 22 | 323.43 | 21.83 | 19.6 |  |
| 4 | 10 | 22 | 333.98 | 8.47 | 18.08 |  |  | 2 | 18 | 22 | 925.05 | 22.98 | 33.22 |  |
| 6 | 10 | 22 | 2544.66 | 19.28 | 49 |  |  | 4 | 18 | 22 | 85.52 | 25.68 | 11.13 |  |
| 8 | 10 | 22 | 178.76 | 8.09 | 13.45 |  |  | 6 | 18 | 22 | 513.49 | 51.61 | 25.69 |  |
| 10 | 10 | 22 | 1559.61 | 19.98 | 39.4 |  |  | 1 | 19 | 22 | 192.66 | 26.11 | 17.14 |  |
| 1 | 11 | 22 | 43.54 | 6.81 | 6.7 |  |  | 3 | 19 | 22 | 103.5 | 43.5 | 11.65 |  |
| 3 | 11 | 22 | 117.52 | 8.24 | 10.58 |  |  | 5 | 19 | 22 | 44.66 | 32.92 | 5.53 |  |
| 5 | 11 | 22 | 149.68 | 7.35 | 11.96 |  |  | 0 | 1 | 23 | 669.01 | 12.49 | 25.33 |  |
| 7 | 11 | 22 | 202.58 | 8.08 | 14.6 |  |  | 1 | 2 | 23 | 599.05 | 12.03 | 24.29 |  |
| 9 | 11 | 22 | 217.99 | 8.58 | 15.1 |  |  | 0 | 3 | 23 | 1250.26 | 13.84 | 34.31 |  |
| 11 | 11 | 22 | 305.99 | 15.8 | 18.24 |  |  | 2 | 3 | 23 | 254.15 | 11.33 | 15.67 |  |
| 0 | 12 | 22 | 152.85 | 7.19 | 12.16 |  |  | 1 | 4 | 23 | 145.56 | 15.8 | 11.86 |  |
| 2 | 12 | 22 | 75.11 | 7.01 | 8.69 |  |  | 3 | 4 | 23 | 287.28 | 7.61 | 16.18 |  |
| 4 | 12 | 22 | 560.39 | 9.72 | 23.18 |  |  | 0 | 5 | 23 | 103.22 | 7.67 | 9.93 |  |
| 6 | 12 | 22 | 197.56 | 7.85 | 14.45 |  |  | 2 | 5 | 23 | 492.02 | 8.58 | 21.93 |  |
| 8 | 12 | 22 | 130.45 | 8.41 | 12.02 |  |  | 4 | 5 | 23 | 651.24 | 9.39 | 24.72 |  |
| 10 | 12 | 22 | 351.23 | 12.38 | 18.53 |  |  | 1 | 6 | 23 | 456.51 | 8.93 | 21 |  |
| 12 | 12 | 22 | 168.61 | 17.4 | 14.4 |  |  | 3 | 6 | 23 | 145.2 | 6.87 | 11.79 |  |
| 1 | 13 | 22 | 404.68 | 8.47 | 19.76 |  |  | 5 | 6 | 23 | 129.11 | 7.03 | 11.44 |  |
| 3 | 13 | 22 | 90.4 | 7.44 | 10.11 |  |  | 0 | 7 | 23 | 395.89 | 8.17 | 19.38 |  |
| 5 | 13 | 22 | 159.78 | 8.24 | 12.7 |  |  | 2 | 7 | 23 | 295.83 | 8.18 | 16.6 |  |
| 7 | 13 | 22 | 144 | 8.41 | 12.53 |  |  | 4 | 7 | 23 | 153.4 | 7.44 | 11.96 |  |
| 9 | 13 | 22 | 117.86 | 10.58 | 11.82 |  |  | 6 | 7 | 23 | 334.94 | 8.42 | 17.82 |  |
| 11 | 13 | 22 | 214.18 | 17.4 | 15.69 |  |  | 1 | 8 | 23 | 168.41 | 6.78 | 12.8 |  |
| 13 | 13 | 22 | 70.26 | 34.56 | 6.76 |  |  | 3 | 8 | 23 | 349.85 | 8.33 | 18.13 |  |
| 0 | 14 | 22 | 802.48 | 18.8 | 28.01 |  |  | 5 | 8 | 23 | 194.31 | 7.61 | 13.63 |  |
| 2 | 14 | 22 | 1750.15 | 14.43 | 40.81 |  |  | 7 | 8 | 23 | 367.03 | 8.75 | 19.11 |  |
| 4 | 14 | 22 | 128.83 | 8.26 | 11.6 |  |  | 0 | 9 | 23 | 512.5 | 23.26 | 22.18 |  |
| 6 | 14 | 22 | 1403.42 | 14.42 | 37.58 |  |  | 2 | 9 | 23 | 233.92 | 14.88 | 15.39 |  |

| h | k | l | Fcal^2 | Fobs^2 | (Fobs^2) | |  | h | k | l | Fcal^2 | Fobs^2 | (Fobs^2) | |
| --- | --- | --- | --- | --- | --- | --- | --- | --- | --- | --- | --- | --- | --- | --- |
|  |  |  |  |  |  |  |  |  |  |  |  |  |  |  |
| 4 | 9 | 23 | 89.54 | 7.85 | 9.43 |  |  | 5 | 18 | 23 | 9.64 | 102.54 | 8.61 |  |
| 6 | 9 | 23 | 418.78 | 9.36 | 20.09 |  |  | 0 | 0 | 24 | 3146.64 | 47.49 | 54.76 |  |
| 8 | 9 | 23 | 295.99 | 8.9 | 17.02 |  |  | 1 | 1 | 24 | 328.71 | 12.82 | 17.76 |  |
| 1 | 10 | 23 | 67.61 | 7.01 | 8.02 |  |  | 0 | 2 | 24 | 445.02 | 9.64 | 21.04 |  |
| 3 | 10 | 23 | 210.84 | 13.05 | 14.68 |  |  | 2 | 2 | 24 | 530.56 | 14.43 | 22.13 |  |
| 5 | 10 | 23 | 358.64 | 8.7 | 18.58 |  |  | 1 | 3 | 24 | 285.96 | 7.93 | 16.53 |  |
| 7 | 10 | 23 | 262.22 | 19.01 | 16.41 |  |  | 3 | 3 | 24 | 188.67 | 10.07 | 13.22 |  |
| 9 | 10 | 23 | 192 | 10.27 | 13.69 |  |  | 0 | 4 | 24 | 2957.96 | 75.68 | 52.53 |  |
| 0 | 11 | 23 | 50.63 | 6.95 | 7.33 |  |  | 2 | 4 | 24 | 125.89 | 7.33 | 11.15 |  |
| 2 | 11 | 23 | 344.13 | 8.58 | 18.72 |  |  | 4 | 4 | 24 | 1801.59 | 22.06 | 41.02 |  |
| 4 | 11 | 23 | 228.96 | 8.41 | 15.64 |  |  | 1 | 5 | 24 | 951.06 | 11.46 | 29.86 |  |
| 6 | 11 | 23 | 122.51 | 8.09 | 11.67 |  |  | 3 | 5 | 24 | 112.2 | 7.2 | 10.67 |  |
| 8 | 11 | 23 | 91.22 | 9.51 | 9.65 |  |  | 5 | 5 | 24 | 1.65 | 9.84 | 1.29 |  |
| 10 | 11 | 23 | 53.3 | 11.4 | 8 |  |  | 0 | 6 | 24 | 376.22 | 8.9 | 19.03 |  |
| 1 | 12 | 23 | 348.93 | 12.48 | 18.78 |  |  | 2 | 6 | 24 | 204.4 | 10.99 | 14.13 |  |
| 3 | 12 | 23 | 138.27 | 8.01 | 12.17 |  |  | 4 | 6 | 24 | 306.65 | 9.73 | 16.95 |  |
| 5 | 12 | 23 | 232.2 | 8.41 | 15.47 |  |  | 6 | 6 | 24 | 162.44 | 10.99 | 12.4 |  |
| 7 | 12 | 23 | 67.46 | 10.39 | 9.04 |  |  | 1 | 7 | 24 | 436.92 | 20.16 | 21.04 |  |
| 9 | 12 | 23 | 124.11 | 12.52 | 11.15 |  |  | 3 | 7 | 24 | 314.65 | 8.01 | 17.26 |  |
| 11 | 12 | 23 | 176.78 | 14.29 | 14.97 |  |  | 5 | 7 | 24 | 508.99 | 9.45 | 22.1 |  |
| 0 | 13 | 23 | 200.14 | 11.68 | 14.75 |  |  | 7 | 7 | 24 | 283.68 | 12.6 | 16.56 |  |
| 2 | 13 | 23 | 85.57 | 12.7 | 8.97 |  |  | 0 | 8 | 24 | 2046.92 | 56.22 | 44.73 |  |
| 4 | 13 | 23 | 120.63 | 10.87 | 11.61 |  |  | 2 | 8 | 24 | 379.24 | 20.96 | 19.49 |  |
| 6 | 13 | 23 | 272.46 | 10.94 | 17.03 |  |  | 4 | 8 | 24 | 1787.61 | 39.98 | 41.32 |  |
| 8 | 13 | 23 | 257.12 | 14.48 | 17.01 |  |  | 6 | 8 | 24 | 315.87 | 8.98 | 18.53 |  |
| 10 | 13 | 23 | 94.92 | 13.98 | 10.72 |  |  | 8 | 8 | 24 | 2458.37 | 29.22 | 48.41 |  |
| 12 | 13 | 23 | 36.92 | 39.8 | 8.25 |  |  | 1 | 9 | 24 | 123.49 | 7.69 | 11.15 |  |
| 1 | 14 | 23 | 240.06 | 10.46 | 16.63 |  |  | 3 | 9 | 24 | 236.69 | 8.56 | 15.55 |  |
| 3 | 14 | 23 | 265.99 | 22.56 | 16.37 |  |  | 5 | 9 | 24 | 445.06 | 27.72 | 21.67 |  |
| 5 | 14 | 23 | 49.05 | 11.08 | 7.08 |  |  | 7 | 9 | 24 | 210.53 | 10.07 | 15.36 |  |
| 7 | 14 | 23 | 115.04 | 13.47 | 11.58 |  |  | 9 | 9 | 24 | 105.29 | 15.34 | 10.66 |  |
| 9 | 14 | 23 | 169.34 | 16.26 | 14.76 |  |  | 0 | 10 | 24 | 305.86 | 27.94 | 17.77 |  |
| 11 | 14 | 23 | 49.04 | 24.89 | 6.58 |  |  | 2 | 10 | 24 | 188.46 | 16.83 | 13.96 |  |
| 0 | 15 | 23 | 22.39 | 13.8 | 4.54 |  |  | 4 | 10 | 24 | 101.89 | 13.96 | 10.85 |  |
| 2 | 15 | 23 | 67.74 | 32.04 | 8.6 |  |  | 6 | 10 | 24 | 213.05 | 10.55 | 14.75 |  |
| 4 | 15 | 23 | 113.81 | 13.37 | 11.15 |  |  | 8 | 10 | 24 | 145.18 | 11.73 | 12.87 |  |
| 6 | 15 | 23 | 121.92 | 23.24 | 13.41 |  |  | 10 | 10 | 24 | 125.92 | 21.52 | 11.58 |  |
| 8 | 15 | 23 | 3.54 | 100.75 | 16.48 |  |  | 1 | 11 | 24 | 215.28 | 15.11 | 15.15 |  |
| 10 | 15 | 23 | 128.35 | 22.63 | 14.55 |  |  | 3 | 11 | 24 | 117.1 | 8.91 | 11.63 |  |
| 1 | 16 | 23 | 148.94 | 31.93 | 12.71 |  |  | 5 | 11 | 24 | 11.33 | 9.77 | 3.91 |  |
| 3 | 16 | 23 | 115.58 | 22.21 | 13.13 |  |  | 7 | 11 | 24 | 203.85 | 12.82 | 14.65 |  |
| 5 | 16 | 23 | 159.02 | 23.83 | 14.66 |  |  | 9 | 11 | 24 | 215.5 | 13.65 | 15.84 |  |
| 0 | 17 | 23 | 0 | 22.66 | 3.41 |  |  | 11 | 11 | 24 | 23.3 | 22.89 | 5.54 |  |
| 2 | 17 | 23 | 73.4 | 24.26 | 10.73 |  |  | 0 | 12 | 24 | 1733.24 | 16.09 | 40.97 |  |
| 4 | 17 | 23 | 77.88 | 28.38 | 10.29 |  |  | 2 | 12 | 24 | 104.62 | 10.32 | 10.01 |  |
| 6 | 17 | 23 | 48.68 | 62.49 | 10.4 |  |  | 4 | 12 | 24 | 693.82 | 13.99 | 26.85 |  |
| 1 | 18 | 23 | 41.58 | 39.37 | 9.09 |  |  | 6 | 12 | 24 | 17.06 | 12.23 | 5.74 |  |
| 3 | 18 | 23 | 56.74 | 43.03 | 11.46 |  |  | 8 | 12 | 24 | 731.1 | 18.04 | 28.51 |  |

| h | k | l | Fcal^2 | Fobs^2 | (Fobs^2) | |  | h | k | l | Fcal^2 | Fobs^2 | (Fobs^2) | |
| --- | --- | --- | --- | --- | --- | --- | --- | --- | --- | --- | --- | --- | --- | --- |
|  |  |  |  |  |  |  |  |  |  |  |  |  |  |  |
| 10 | 12 | 24 | 139 | 23.59 | 13.76 |  |  | 7 | 10 | 25 | 139.3 | 14.67 | 13.48 |  |
| 12 | 12 | 24 | 558.26 | 112.08 | 27.09 |  |  | 9 | 10 | 25 | 127.77 | 33.62 | 10.95 |  |
| 1 | 13 | 24 | 122.7 | 13.51 | 11.37 |  |  | 0 | 11 | 25 | 463.27 | 15.52 | 21.74 |  |
| 3 | 13 | 24 | 97.32 | 13.06 | 10.07 |  |  | 2 | 11 | 25 | 49.35 | 12.73 | 7.68 |  |
| 5 | 13 | 24 | 11.15 | 13.61 | 2.12 |  |  | 4 | 11 | 25 | 145.19 | 16.38 | 12.75 |  |
| 7 | 13 | 24 | 98.51 | 17.39 | 11.01 |  |  | 6 | 11 | 25 | 133.44 | 21.85 | 12.59 |  |
| 9 | 13 | 24 | 103.82 | 25.4 | 13.47 |  |  | 8 | 11 | 25 | 10.91 | 18.88 | 6.03 |  |
| 0 | 14 | 24 | 87.02 | 16.94 | 10.2 |  |  | 10 | 11 | 25 | 0.05 | 4.69 | 6.55 |  |
| 2 | 14 | 24 | 75.02 | 17.4 | 9.38 |  |  | 1 | 12 | 25 | 60.5 | 17.75 | 7.81 |  |
| 4 | 14 | 24 | 14.12 | 16.71 | 5.39 |  |  | 3 | 12 | 25 | 5.86 | 19.01 | 4.93 |  |
| 6 | 14 | 24 | 72.6 | 21.9 | 12.13 |  |  | 5 | 12 | 25 | 101.52 | 18.31 | 10.64 |  |
| 8 | 14 | 24 | 166.95 | 32.51 | 16.1 |  |  | 7 | 12 | 25 | 16.93 | 22.89 | 4.9 |  |
| 1 | 15 | 24 | 270.68 | 28.63 | 18.43 |  |  | 9 | 12 | 25 | 50.53 | 29.98 | 9.2 |  |
| 3 | 15 | 24 | 146.91 | 23.35 | 13.31 |  |  | 0 | 13 | 25 | 294.21 | 22.44 | 18.22 |  |
| 5 | 15 | 24 | 17.7 | 59.96 | 6.43 |  |  | 2 | 13 | 25 | 95.65 | 40.28 | 9.84 |  |
| 7 | 15 | 24 | 5.59 | 60.66 | 13.19 |  |  | 4 | 13 | 25 | 91.76 | 26.78 | 10.09 |  |
| 0 | 16 | 24 | 802.63 | 31.88 | 31.98 |  |  | 6 | 13 | 25 | 28.54 | 29.76 | 7.97 |  |
| 2 | 16 | 24 | 218.9 | 44.88 | 17.75 |  |  | 8 | 13 | 25 | 63.04 | 50.13 | 12.26 |  |
| 4 | 16 | 24 | 568.95 | 42.19 | 29.32 |  |  | 1 | 14 | 25 | 141.92 | 47.16 | 14.68 |  |
| 1 | 17 | 24 | 197.76 | 66.87 | 17.36 |  |  | 3 | 14 | 25 | 51.12 | 34.1 | 8.44 |  |
| 0 | 1 | 25 | 299.92 | 9.06 | 17.13 |  |  | 5 | 14 | 25 | 16.15 | 30.9 | 6.89 |  |
| 1 | 2 | 25 | 333.01 | 9.71 | 18.51 |  |  | 0 | 15 | 25 | 27.63 | 38.68 | 8.4 |  |
| 0 | 3 | 25 | 352.26 | 9.85 | 18.49 |  |  | 2 | 15 | 25 | 92.33 | 44.41 | 9.64 |  |
| 2 | 3 | 25 | 277.09 | 23.13 | 17.1 |  |  | 4 | 15 | 25 | 37.42 | 49.89 | 6.4 |  |
| 1 | 4 | 25 | 113.67 | 8.93 | 11.19 |  |  | 0 | 0 | 26 | 117.65 | 17.63 | 10.21 |  |
| 3 | 4 | 25 | 220.24 | 8.54 | 14.61 |  |  | 1 | 1 | 26 | 412.65 | 16.49 | 20.77 |  |
| 0 | 5 | 25 | 91.72 | 13.51 | 10.15 |  |  | 0 | 2 | 26 | 141.66 | 8.9 | 12.63 |  |
| 2 | 5 | 25 | 248.65 | 19.47 | 16.48 |  |  | 2 | 2 | 26 | 1802.02 | 24.58 | 42.51 |  |
| 4 | 5 | 25 | 267.94 | 8.66 | 16.37 |  |  | 1 | 3 | 26 | 126.73 | 9.06 | 11.75 |  |
| 1 | 6 | 25 | 251.39 | 11.79 | 16.22 |  |  | 3 | 3 | 26 | 183.18 | 12.59 | 13.89 |  |
| 3 | 6 | 25 | 56.71 | 8.7 | 8.47 |  |  | 0 | 4 | 26 | 75.54 | 8.37 | 9.31 |  |
| 5 | 6 | 25 | 99.84 | 8.01 | 9.96 |  |  | 2 | 4 | 26 | 203.31 | 8.96 | 14.88 |  |
| 0 | 7 | 25 | 73.55 | 7.75 | 9.33 |  |  | 4 | 4 | 26 | 179.96 | 14.88 | 14.16 |  |
| 2 | 7 | 25 | 234.41 | 17.52 | 15.56 |  |  | 1 | 5 | 26 | 169.39 | 8.65 | 13.48 |  |
| 4 | 7 | 25 | 166.31 | 10.19 | 12.91 |  |  | 3 | 5 | 26 | 359.8 | 10.51 | 19.68 |  |
| 6 | 7 | 25 | 243.07 | 11.56 | 15.92 |  |  | 5 | 5 | 26 | 175.31 | 19.69 | 14.33 |  |
| 1 | 8 | 25 | 172.85 | 9.96 | 14 |  |  | 0 | 6 | 26 | 151.56 | 13.74 | 12.75 |  |
| 3 | 8 | 25 | 305.49 | 30.46 | 17.78 |  |  | 2 | 6 | 26 | 1205.24 | 17.56 | 35.12 |  |
| 5 | 8 | 25 | 206.89 | 11.33 | 14.88 |  |  | 4 | 6 | 26 | 202.68 | 16.05 | 15.33 |  |
| 7 | 8 | 25 | 305.25 | 15.92 | 18.34 |  |  | 6 | 6 | 26 | 1614.22 | 35.6 | 40.62 |  |
| 0 | 9 | 25 | 266.57 | 17.17 | 16.58 |  |  | 1 | 7 | 26 | 26.37 | 12 | 6.46 |  |
| 2 | 9 | 25 | 210.61 | 10.89 | 14.86 |  |  | 3 | 7 | 26 | 195.24 | 16.87 | 14.02 |  |
| 4 | 9 | 25 | 24.07 | 10.5 | 4.86 |  |  | 5 | 7 | 26 | 169.53 | 17.66 | 13.55 |  |
| 6 | 9 | 25 | 209.42 | 13.91 | 15.35 |  |  | 7 | 7 | 26 | 184.74 | 35.26 | 15.51 |  |
| 8 | 9 | 25 | 151.14 | 15.23 | 12.87 |  |  | 0 | 8 | 26 | 247.67 | 14.07 | 16.24 |  |
| 1 | 10 | 25 | 230.72 | 13.74 | 15.9 |  |  | 2 | 8 | 26 | 70.16 | 16.02 | 8.88 |  |
| 3 | 10 | 25 | 147.78 | 20.6 | 12.97 |  |  | 4 | 8 | 26 | 39.37 | 16.07 | 7.51 |  |
| 5 | 10 | 25 | 46.9 | 16.94 | 7.71 |  |  | 6 | 8 | 26 | 114.8 | 21.07 | 11.94 |  |

| h | k | l | Fcal^2 | Fobs^2 | (Fobs^2) | |  | h | k | l | Fcal^2 | Fobs^2 | (Fobs^2) | |
| --- | --- | --- | --- | --- | --- | --- | --- | --- | --- | --- | --- | --- | --- | --- |
|  |  |  |  |  |  |  |  |  |  |  |  |  |  |  |
| 8 | 8 | 26 | 213.62 | 37.55 | 16.47 |  |  | 3 | 7 | 28 | 35.17 | 49.9 | 9.58 |  |
| 1 | 9 | 26 | 74.68 | 25.26 | 9.51 |  |  | 5 | 7 | 28 | 25.95 | 54.24 | 8.15 |  |
| 3 | 9 | 26 | 135.07 | 17.75 | 12.61 |  |  | 0 | 8 | 28 | 510.46 | 97.15 | 24.1 |  |
| 5 | 9 | 26 | 123.08 | 22.81 | 11.98 |  |  | 4 | 8 | 28 | 509.77 | 56.85 | 28.33 |  |
| 7 | 9 | 26 | 121.82 | 50.25 | 11.89 |  |  |  |  |  |  |  |  |  |
| 9 | 9 | 26 | 10.43 | 87.89 | 8.37 |  |  |  |  |  |  |  |  |  |
| 0 | 10 | 26 | 113.42 | 66.39 | 12.28 |  |  |  |  |  |  |  |  |  |
| 2 | 10 | 26 | 1069.81 | 37.94 | 34 |  |  |  |  |  |  |  |  |  |
| 4 | 10 | 26 | 109.01 | 29.96 | 10.56 |  |  |  |  |  |  |  |  |  |
| 6 | 10 | 26 | 547.62 | 33.88 | 26.41 |  |  |  |  |  |  |  |  |  |
| 8 | 10 | 26 | 44.24 | 49.48 | 10.05 |  |  |  |  |  |  |  |  |  |
| 1 | 11 | 26 | 292.81 | 68.47 | 17.36 |  |  |  |  |  |  |  |  |  |
| 3 | 11 | 26 | 34.7 | 67.75 | 10.58 |  |  |  |  |  |  |  |  |  |
| 5 | 11 | 26 | 41.86 | 46.46 | 9.44 |  |  |  |  |  |  |  |  |  |
| 7 | 11 | 26 | 13.54 | 48.52 | 4.42 |  |  |  |  |  |  |  |  |  |
| 0 | 1 | 27 | 164.84 | 12.05 | 13.5 |  |  |  |  |  |  |  |  |  |
| 1 | 2 | 27 | 193.56 | 17.17 | 14.07 |  |  |  |  |  |  |  |  |  |
| 0 | 3 | 27 | 0 | 15.27 | 2.5 |  |  |  |  |  |  |  |  |  |
| 2 | 3 | 27 | 187.05 | 19.17 | 13.96 |  |  |  |  |  |  |  |  |  |
| 1 | 4 | 27 | 45.48 | 16.59 | 8.56 |  |  |  |  |  |  |  |  |  |
| 3 | 4 | 27 | 143.81 | 18.96 | 12.6 |  |  |  |  |  |  |  |  |  |
| 0 | 5 | 27 | 221.33 | 24.5 | 15.77 |  |  |  |  |  |  |  |  |  |
| 2 | 5 | 27 | 42.56 | 17.4 | 6.48 |  |  |  |  |  |  |  |  |  |
| 4 | 5 | 27 | 118.44 | 18.04 | 11.61 |  |  |  |  |  |  |  |  |  |
| 1 | 6 | 27 | 184.26 | 40.52 | 14.1 |  |  |  |  |  |  |  |  |  |
| 3 | 6 | 27 | 145.35 | 20.27 | 13.24 |  |  |  |  |  |  |  |  |  |
| 5 | 6 | 27 | 227.06 | 25.53 | 16.62 |  |  |  |  |  |  |  |  |  |
| 0 | 7 | 27 | 63.3 | 27.92 | 9.27 |  |  |  |  |  |  |  |  |  |
| 2 | 7 | 27 | 35.18 | 30.21 | 7.97 |  |  |  |  |  |  |  |  |  |
| 4 | 7 | 27 | 161.66 | 24.04 | 14.13 |  |  |  |  |  |  |  |  |  |
| 6 | 7 | 27 | 41.47 | 25.62 | 8.7 |  |  |  |  |  |  |  |  |  |
| 1 | 8 | 27 | 101.33 | 28.39 | 12.11 |  |  |  |  |  |  |  |  |  |
| 3 | 8 | 27 | 146.71 | 31.36 | 10.56 |  |  |  |  |  |  |  |  |  |
| 5 | 8 | 27 | 73.75 | 27.7 | 9.42 |  |  |  |  |  |  |  |  |  |
| 7 | 8 | 27 | 85.96 | 66.84 | 10.23 |  |  |  |  |  |  |  |  |  |
| 0 | 9 | 27 | 19.22 | 42.34 | 5.63 |  |  |  |  |  |  |  |  |  |
| 2 | 9 | 27 | 87.77 | 29.07 | 12.25 |  |  |  |  |  |  |  |  |  |
| 4 | 9 | 27 | 71.03 | 32.73 | 10.33 |  |  |  |  |  |  |  |  |  |
| 6 | 9 | 27 | 31.32 | 34.79 | 5.8 |  |  |  |  |  |  |  |  |  |
| 1 | 10 | 27 | 71.94 | 42.8 | 8.61 |  |  |  |  |  |  |  |  |  |
| 3 | 10 | 27 | 85.2 | 50.82 | 10.45 |  |  |  |  |  |  |  |  |  |
| 1 | 3 | 28 | 398.11 | 46.72 | 19.5 |  |  |  |  |  |  |  |  |  |
| 0 | 4 | 28 | 578.7 | 33.69 | 26.88 |  |  |  |  |  |  |  |  |  |
| 2 | 4 | 28 | 145.13 | 54.27 | 17.09 |  |  |  |  |  |  |  |  |  |
| 1 | 5 | 28 | 12.27 | 36.39 | 5.86 |  |  |  |  |  |  |  |  |  |
| 0 | 6 | 28 | 29.8 | 26.09 | 7.65 |  |  |  |  |  |  |  |  |  |
| 2 | 6 | 28 | 43.84 | 40.97 | 8.6 |  |  |  |  |  |  |  |  |  |
| 1 | 7 | 28 | 36.44 | 29.98 | 7.85 |  |  |  |  |  |  |  |  |  |

Crystal 5

| h | k | l | Fcal^2 | Fobs^2 | σ(Fobs^2) | |  | h | k | l | Fcal^2 | Fobs^2 | σ(Fobs^2) | |
| --- | --- | --- | --- | --- | --- | --- | --- | --- | --- | --- | --- | --- | --- | --- |
|  |  |  |  |  |  |  |  |  |  |  |  |  |  |  |
| 0 | 2 | 2 | 18851.65 | 191.48 | 137.44 |  |  | 4 | 5 | 7 | 7809.45 | 41.83 | 93.2 |  |
| 0 | 1 | 3 | 14237.04 | 68.26 | 127.76 |  |  | 1 | 6 | 7 | 5185.29 | 27.48 | 76.19 |  |
| 1 | 2 | 3 | 2466.1 | 15.5 | 57.25 |  |  | 3 | 6 | 7 | 8542.17 | 40.29 | 96.42 |  |
| 0 | 3 | 3 | 1612.6 | 15.02 | 41.65 |  |  | 5 | 6 | 7 | 5558.77 | 34.78 | 77.64 |  |
| 2 | 3 | 3 | 34821.26 | 261.08 | 184.46 |  |  | 0 | 7 | 7 | 8924.44 | 67.62 | 98.24 |  |
| 0 | 0 | 4 | 389.98 | 6.92 | 25.36 |  |  | 2 | 7 | 7 | 4972.72 | 37.69 | 75.16 |  |
| 1 | 1 | 4 | 9867.5 | 71.72 | 106.21 |  |  | 4 | 7 | 7 | 6131.62 | 42.44 | 77.63 |  |
| 0 | 2 | 4 | 2706.5 | 14.07 | 56.34 |  |  | 6 | 7 | 7 | 8241.82 | 67.58 | 90.83 |  |
| 2 | 2 | 4 | 18474.38 | 133.28 | 142.2 |  |  | 0 | 0 | 8 | 93270.76 | 878.28 | 275.78 |  |
| 1 | 3 | 4 | 31288.09 | 171.94 | 173.94 |  |  | 1 | 1 | 8 | 1749.98 | 13.93 | 48.45 |  |
| 3 | 3 | 4 | 39199.25 | 300.23 | 191.2 |  |  | 0 | 2 | 8 | 1154.06 | 6.99 | 37.66 |  |
| 2 | 4 | 4 | 30279.41 | 242.46 | 168.37 |  |  | 2 | 2 | 8 | 11616.09 | 81 | 107.13 |  |
| 0 | 1 | 5 | 1757.74 | 9.75 | 48.46 |  |  | 1 | 3 | 8 | 6569.54 | 33.43 | 84.77 |  |
| 1 | 2 | 5 | 3038.61 | 16.64 | 61.54 |  |  | 3 | 3 | 8 | 3360.05 | 23 | 62.56 |  |
| 0 | 3 | 5 | 1374.85 | 25.32 | 43.88 |  |  | 0 | 4 | 8 | 54695.55 | 251.31 | 221.15 |  |
| 2 | 3 | 5 | 18035.29 | 121.68 | 137.41 |  |  | 2 | 4 | 8 | 9737.32 | 45.21 | 102.05 |  |
| 1 | 4 | 5 | 8743.26 | 44.36 | 101.11 |  |  | 4 | 4 | 8 | 38321.32 | 268.67 | 194.35 |  |
| 3 | 4 | 5 | 5380.71 | 28.88 | 79.81 |  |  | 1 | 5 | 8 | 11366.15 | 54.95 | 108.67 |  |
| 0 | 5 | 5 | 14875.38 | 113.69 | 126.85 |  |  | 3 | 5 | 8 | 3434.7 | 17.55 | 63.66 |  |
| 2 | 5 | 5 | 673.53 | 5.93 | 31.21 |  |  | 5 | 5 | 8 | 2232.51 | 16.51 | 47.06 |  |
| 4 | 5 | 5 | 16492.9 | 130.15 | 130.18 |  |  | 0 | 6 | 8 | 12490.28 | 81.66 | 112.74 |  |
| 0 | 0 | 6 | 1646.11 | 19.21 | 44.45 |  |  | 2 | 6 | 8 | 2173.12 | 12.2 | 49.96 |  |
| 1 | 1 | 6 | 5587.4 | 38.31 | 82.24 |  |  | 4 | 6 | 8 | 1884.31 | 11.14 | 45.34 |  |
| 0 | 2 | 6 | 6509.15 | 31.51 | 87.75 |  |  | 6 | 6 | 8 | 4226.51 | 34.67 | 67.54 |  |
| 2 | 2 | 6 | 73087.7 | 550.27 | 249.94 |  |  | 1 | 7 | 8 | 5663.69 | 31.05 | 78.06 |  |
| 1 | 3 | 6 | 3571.42 | 18.56 | 68.3 |  |  | 3 | 7 | 8 | 8769.03 | 43.65 | 95.34 |  |
| 3 | 3 | 6 | 8038.02 | 61.92 | 93.58 |  |  | 5 | 7 | 8 | 7436.91 | 42.02 | 86.94 |  |
| 0 | 4 | 6 | 4389.44 | 22.42 | 70.88 |  |  | 7 | 7 | 8 | 6563.46 | 54.68 | 80.74 |  |
| 2 | 4 | 6 | 7374.43 | 40.17 | 89.18 |  |  | 0 | 8 | 8 | 58739.98 | 409.67 | 225.73 |  |
| 4 | 4 | 6 | 6704.71 | 50.81 | 87.29 |  |  | 2 | 8 | 8 | 8358.69 | 63.92 | 91.04 |  |
| 1 | 5 | 6 | 12212.08 | 61.56 | 114.38 |  |  | 4 | 8 | 8 | 44592.09 | 313.72 | 201.65 |  |
| 3 | 5 | 6 | 11994.28 | 58.99 | 112.24 |  |  | 6 | 8 | 8 | 7657.23 | 63.52 | 87.81 |  |
| 5 | 5 | 6 | 16291.57 | 127.38 | 129.24 |  |  | 8 | 8 | 8 | 25687.67 | 339.75 | 155.08 |  |
| 0 | 6 | 6 | 9585.11 | 74.77 | 97.68 |  |  | 0 | 1 | 9 | 12783.02 | 74.4 | 114.64 |  |
| 2 | 6 | 6 | 57981.72 | 442.02 | 230.44 |  |  | 1 | 2 | 9 | 9703.19 | 47.56 | 100.5 |  |
| 4 | 6 | 6 | 13781.24 | 102.89 | 118.15 |  |  | 0 | 3 | 9 | 3958.86 | 20.5 | 67.16 |  |
| 6 | 6 | 6 | 107068.84 | 1379.49 | 287.92 |  |  | 2 | 3 | 9 | 2761.65 | 15.11 | 56.65 |  |
| 0 | 1 | 7 | 7242.16 | 35.22 | 91.4 |  |  | 1 | 4 | 9 | 2681.53 | 14.14 | 56.48 |  |
| 1 | 2 | 7 | 8234.46 | 40.14 | 96.95 |  |  | 3 | 4 | 9 | 7692.02 | 37.96 | 91.15 |  |
| 0 | 3 | 7 | 2571.97 | 13.47 | 57.59 |  |  | 0 | 5 | 9 | 2316.93 | 12.88 | 48.71 |  |
| 2 | 3 | 7 | 5532.43 | 27.9 | 77.41 |  |  | 2 | 5 | 9 | 6307.24 | 30.57 | 83.67 |  |
| 1 | 4 | 7 | 7002.4 | 32.6 | 88.57 |  |  | 4 | 5 | 9 | 3631.42 | 20.02 | 63.7 |  |
| 3 | 4 | 7 | 4321.78 | 23.98 | 69.55 |  |  | 1 | 6 | 9 | 4110.42 | 30.6 | 66.54 |  |
| 0 | 5 | 7 | 3864.05 | 20.05 | 68.74 |  |  | 3 | 6 | 9 | 3438.59 | 19.73 | 62.07 |  |
| 2 | 5 | 7 | 2574.57 | 15.79 | 52.72 |  |  | 5 | 6 | 9 | 1714.69 | 10.58 | 44.3 |  |

| h | k | l | Fcal^2 | Fobs^2 | (Fobs^2) | |  | h | k | l | Fcal^2 | Fobs^2 | (Fobs^2) | |
| --- | --- | --- | --- | --- | --- | --- | --- | --- | --- | --- | --- | --- | --- | --- |
|  |  |  |  |  |  |  |  |  |  |  |  |  |  |  |
| 0 | 7 | 9 | 7340.24 | 36.8 | 85.93 |  |  | 10 | 10 | 10 | 14572.49 | 217.62 | 114.52 |  |
| 2 | 7 | 9 | 8091.01 | 40.27 | 92.46 |  |  | 0 | 1 | 11 | 7496.31 | 36.61 | 88.82 |  |
| 4 | 7 | 9 | 1589.69 | 8.98 | 41.55 |  |  | 1 | 2 | 11 | 5872.12 | 30.03 | 77.69 |  |
| 6 | 7 | 9 | 3399.02 | 21.04 | 59.2 |  |  | 0 | 3 | 11 | 7000.84 | 34.42 | 86.01 |  |
| 1 | 8 | 9 | 3947.16 | 21.7 | 64.69 |  |  | 2 | 3 | 11 | 2232.51 | 12.67 | 50.7 |  |
| 3 | 8 | 9 | 3938.75 | 21.01 | 64.74 |  |  | 1 | 4 | 11 | 546.85 | 4.9 | 25.26 |  |
| 5 | 8 | 9 | 5431.38 | 30.21 | 75.64 |  |  | 3 | 4 | 11 | 6354.44 | 32.28 | 81.45 |  |
| 7 | 8 | 9 | 2487.07 | 15.83 | 51.39 |  |  | 0 | 5 | 11 | 4142.5 | 21.44 | 65.57 |  |
| 0 | 9 | 9 | 5571.4 | 43.55 | 78.54 |  |  | 2 | 5 | 11 | 5964.47 | 29.33 | 79.92 |  |
| 2 | 9 | 9 | 4860.09 | 34.67 | 72.07 |  |  | 4 | 5 | 11 | 4105.8 | 21.07 | 65.44 |  |
| 4 | 9 | 9 | 1304.73 | 12.02 | 34.15 |  |  | 1 | 6 | 11 | 4216.59 | 22.04 | 68.86 |  |
| 6 | 9 | 9 | 4726.56 | 39.19 | 68.93 |  |  | 3 | 6 | 11 | 4925.69 | 25.7 | 70.03 |  |
| 8 | 9 | 9 | 1747 | 18.37 | 42.72 |  |  | 5 | 6 | 11 | 1861.51 | 11.57 | 43.02 |  |
| 0 | 0 | 10 | 49882.5 | 452.95 | 207.94 |  |  | 0 | 7 | 11 | 3867.54 | 20.02 | 64.36 |  |
| 1 | 1 | 10 | 1102.7 | 8.98 | 34.68 |  |  | 2 | 7 | 11 | 2800.16 | 15.72 | 52.83 |  |
| 0 | 2 | 10 | 1438.56 | 8.46 | 38.01 |  |  | 4 | 7 | 11 | 6881.75 | 35.19 | 82.78 |  |
| 2 | 2 | 10 | 46776.38 | 304.88 | 206.6 |  |  | 6 | 7 | 11 | 494.09 | 4.77 | 24.45 |  |
| 1 | 3 | 10 | 5048.6 | 24.66 | 75.16 |  |  | 1 | 8 | 11 | 4184.24 | 21.99 | 64.64 |  |
| 3 | 3 | 10 | 14783.5 | 97.98 | 120.1 |  |  | 3 | 8 | 11 | 133.69 | 2.82 | 12.2 |  |
| 0 | 4 | 10 | 225.59 | 3.02 | 14.64 |  |  | 5 | 8 | 11 | 121.64 | 3.08 | 12 |  |
| 2 | 4 | 10 | 8425.34 | 39.99 | 93.36 |  |  | 7 | 8 | 11 | 568.02 | 6.66 | 25.28 |  |
| 4 | 4 | 10 | 8352.79 | 58.45 | 94.35 |  |  | 0 | 9 | 11 | 2011.86 | 12.14 | 48.73 |  |
| 1 | 5 | 10 | 5060.75 | 24.74 | 74.08 |  |  | 2 | 9 | 11 | 1779.02 | 10.27 | 42.93 |  |
| 3 | 5 | 10 | 3422.82 | 18.16 | 60.51 |  |  | 4 | 9 | 11 | 2446.45 | 14.85 | 48.57 |  |
| 5 | 5 | 10 | 1465.36 | 13.02 | 40.12 |  |  | 6 | 9 | 11 | 1751.82 | 13.33 | 43.95 |  |
| 0 | 6 | 10 | 4135.91 | 34.52 | 68.3 |  |  | 8 | 9 | 11 | 3161.39 | 22.3 | 56.1 |  |
| 2 | 6 | 10 | 47853.5 | 221.2 | 207.94 |  |  | 1 | 10 | 11 | 676.42 | 8.94 | 27.05 |  |
| 4 | 6 | 10 | 2271.8 | 14.34 | 48.55 |  |  | 3 | 10 | 11 | 1669.09 | 10.46 | 40.64 |  |
| 6 | 6 | 10 | 16233.57 | 115.95 | 129.19 |  |  | 5 | 10 | 11 | 1376.6 | 10.32 | 36.62 |  |
| 1 | 7 | 10 | 5504.14 | 26.99 | 75.27 |  |  | 7 | 10 | 11 | 2116.51 | 15.83 | 45.65 |  |
| 3 | 7 | 10 | 2222.84 | 12.78 | 51.78 |  |  | 9 | 10 | 11 | 1801.73 | 14.85 | 41.24 |  |
| 5 | 7 | 10 | 3616.67 | 20.87 | 62.94 |  |  | 0 | 11 | 11 | 3.39 | 3.79 | 2.11 |  |
| 7 | 7 | 10 | 2002.38 | 20.3 | 44.27 |  |  | 2 | 11 | 11 | 2383.48 | 21.09 | 49 |  |
| 0 | 8 | 10 | 4924.67 | 25.88 | 72.81 |  |  | 4 | 11 | 11 | 250.26 | 5.13 | 16.29 |  |
| 2 | 8 | 10 | 5354.38 | 27.11 | 74.51 |  |  | 6 | 11 | 11 | 3910.33 | 34.93 | 63.06 |  |
| 4 | 8 | 10 | 1245.37 | 7.75 | 33.9 |  |  | 8 | 11 | 11 | 4222.71 | 38.92 | 61.93 |  |
| 6 | 8 | 10 | 3255.5 | 20.37 | 56.43 |  |  | 10 | 11 | 11 | 1014.88 | 15.41 | 30.48 |  |
| 8 | 8 | 10 | 2411.01 | 22.25 | 50.85 |  |  | 0 | 0 | 12 | 36741.81 | 337.73 | 185.7 |  |
| 1 | 9 | 10 | 2959.69 | 16.9 | 55.71 |  |  | 1 | 1 | 12 | 3551.49 | 26.97 | 61.85 |  |
| 3 | 9 | 10 | 2464.65 | 14.19 | 50.2 |  |  | 0 | 2 | 12 | 5751.11 | 29.04 | 78.98 |  |
| 5 | 9 | 10 | 3329.76 | 40.88 | 57.28 |  |  | 2 | 2 | 12 | 4189.91 | 32.07 | 63.78 |  |
| 7 | 9 | 10 | 1807.29 | 13.94 | 42.5 |  |  | 1 | 3 | 12 | 3314.73 | 17.52 | 60.32 |  |
| 9 | 9 | 10 | 1652.59 | 19.11 | 40.41 |  |  | 3 | 3 | 12 | 2306.94 | 17.46 | 48.18 |  |
| 0 | 10 | 10 | 1066.05 | 11.24 | 31.59 |  |  | 0 | 4 | 12 | 30566.96 | 160.2 | 171.64 |  |
| 2 | 10 | 10 | 18033.47 | 122.25 | 132.33 |  |  | 2 | 4 | 12 | 1754.68 | 15.61 | 41.67 |  |
| 4 | 10 | 10 | 3542.91 | 26.81 | 59.41 |  |  | 4 | 4 | 12 | 42682.29 | 285.88 | 193.8 |  |
| 6 | 10 | 10 | 22202.56 | 182.27 | 144.78 |  |  | 1 | 5 | 12 | 4867.34 | 24.33 | 72.49 |  |
| 8 | 10 | 10 | 1657.24 | 20.27 | 40.6 |  |  | 3 | 5 | 12 | 4294.25 | 22.6 | 65.62 |  |

| h | k | l | Fcal^2 | Fobs^2 | (Fobs^2) | |  | h | k | l | Fcal^2 | Fobs^2 | (Fobs^2) | |
| --- | --- | --- | --- | --- | --- | --- | --- | --- | --- | --- | --- | --- | --- | --- |
|  |  |  |  |  |  |  |  |  |  |  |  |  |  |  |
| 11 | 12 | 15 | 309.2 | 7.18 | 17.16 |  |  | 1 | 9 | 16 | 2201.39 | 18.07 | 45.99 |  |
| 0 | 13 | 15 | 1344.44 | 10.36 | 34.86 |  |  | 3 | 9 | 16 | 939.56 | 7.53 | 30.14 |  |
| 2 | 13 | 15 | 536.98 | 5.98 | 23.18 |  |  | 5 | 9 | 16 | 2441.36 | 22.2 | 48.88 |  |
| 4 | 13 | 15 | 405.39 | 6.17 | 19.96 |  |  | 7 | 9 | 16 | 1811.93 | 31.68 | 42.16 |  |
| 6 | 13 | 15 | 904.51 | 9.47 | 28.24 |  |  | 9 | 9 | 16 | 677.48 | 10.64 | 24.95 |  |
| 8 | 13 | 15 | 861.36 | 9 | 28.57 |  |  | 0 | 10 | 16 | 830.33 | 6.79 | 28.18 |  |
| 10 | 13 | 15 | 226.92 | 7.11 | 15.03 |  |  | 2 | 10 | 16 | 1294.92 | 11.34 | 35.09 |  |
| 12 | 13 | 15 | 477.65 | 9.31 | 20.98 |  |  | 4 | 10 | 16 | 1086.05 | 8.48 | 31.99 |  |
| 1 | 14 | 15 | 243.05 | 4.67 | 15.24 |  |  | 6 | 10 | 16 | 69.99 | 4.19 | 7.76 |  |
| 3 | 14 | 15 | 574.11 | 6.31 | 23.33 |  |  | 8 | 10 | 16 | 1101.69 | 10.37 | 32.59 |  |
| 5 | 14 | 15 | 1110.44 | 9.69 | 31.5 |  |  | 10 | 10 | 16 | 922.44 | 14.65 | 30.06 |  |
| 7 | 14 | 15 | 805.68 | 8.87 | 26.82 |  |  | 1 | 11 | 16 | 1453.79 | 9.9 | 37.08 |  |
| 9 | 14 | 15 | 384.79 | 7.79 | 19.3 |  |  | 3 | 11 | 16 | 13.23 | 5.78 | 4.16 |  |
| 11 | 14 | 15 | 247.78 | 7.31 | 15.24 |  |  | 5 | 11 | 16 | 599.79 | 7.44 | 24.69 |  |
| 13 | 14 | 15 | 173.18 | 10.72 | 13.19 |  |  | 7 | 11 | 16 | 1144.77 | 10.56 | 32.71 |  |
| 0 | 15 | 15 | 294.72 | 7.21 | 17.42 |  |  | 9 | 11 | 16 | 481.33 | 7.59 | 21.08 |  |
| 2 | 15 | 15 | 596.31 | 10.07 | 24.07 |  |  | 11 | 11 | 16 | 253.5 | 10.63 | 15.47 |  |
| 4 | 15 | 15 | 421.81 | 9.49 | 19.42 |  |  | 0 | 12 | 16 | 3545.66 | 20.29 | 57.63 |  |
| 6 | 15 | 15 | 508.14 | 10.26 | 21.69 |  |  | 2 | 12 | 16 | 202.11 | 4.36 | 14.09 |  |
| 8 | 15 | 15 | 674.67 | 11.97 | 25.05 |  |  | 4 | 12 | 16 | 7517.88 | 42.44 | 83.37 |  |
| 10 | 15 | 15 | 643.63 | 13.11 | 24.34 |  |  | 6 | 12 | 16 | 1570.57 | 12.06 | 38.51 |  |
| 12 | 15 | 15 | 182.97 | 10.05 | 12.83 |  |  | 8 | 12 | 16 | 4153.13 | 26.96 | 60.62 |  |
| 14 | 15 | 15 | 328.87 | 13.28 | 17 |  |  | 10 | 12 | 16 | 18.11 | 5.63 | 4.21 |  |
| 0 | 0 | 16 | 15644.66 | 150.68 | 121.86 |  |  | 12 | 12 | 16 | 1423.64 | 20.57 | 36.72 |  |
| 1 | 1 | 16 | 5589.85 | 40.59 | 73.77 |  |  | 1 | 13 | 16 | 249.12 | 4.62 | 16.34 |  |
| 0 | 2 | 16 | 3136.23 | 20.18 | 54.82 |  |  | 3 | 13 | 16 | 524.98 | 9.97 | 22.24 |  |
| 2 | 2 | 16 | 746.18 | 7.99 | 28.04 |  |  | 5 | 13 | 16 | 1659.07 | 14.58 | 38.17 |  |
| 1 | 3 | 16 | 970.78 | 6.93 | 32.31 |  |  | 7 | 13 | 16 | 808.36 | 11.41 | 26.82 |  |
| 3 | 3 | 16 | 2876.41 | 24.2 | 53.45 |  |  | 9 | 13 | 16 | 68.62 | 8.15 | 8.13 |  |
| 0 | 4 | 16 | 12698.99 | 67.33 | 110.43 |  |  | 11 | 13 | 16 | 14.82 | 5.83 | 3.71 |  |
| 2 | 4 | 16 | 1091.39 | 8.48 | 33.5 |  |  | 13 | 13 | 16 | 0 | 8.15 | 2.92 |  |
| 4 | 4 | 16 | 10336.51 | 79.35 | 99.18 |  |  | 0 | 14 | 16 | 829.33 | 8.11 | 28 |  |
| 1 | 5 | 16 | 1221.67 | 10.87 | 35.2 |  |  | 2 | 14 | 16 | 344.83 | 5.69 | 18.16 |  |
| 3 | 5 | 16 | 971.44 | 7.88 | 31.05 |  |  | 4 | 14 | 16 | 580.68 | 7.31 | 23.23 |  |
| 5 | 5 | 16 | 400.36 | 7.22 | 20.13 |  |  | 6 | 14 | 16 | 527.13 | 7.95 | 22.3 |  |
| 0 | 6 | 16 | 1454.54 | 17.56 | 38.98 |  |  | 8 | 14 | 16 | 349.59 | 6.97 | 17.74 |  |
| 2 | 6 | 16 | 1806.16 | 11.69 | 41.91 |  |  | 10 | 14 | 16 | 367.16 | 7.25 | 18.04 |  |
| 4 | 6 | 16 | 226.49 | 4.23 | 14.32 |  |  | 12 | 14 | 16 | 219.25 | 7.36 | 13.93 |  |
| 6 | 6 | 16 | 2581.38 | 23.95 | 50.67 |  |  | 14 | 14 | 16 | 463.21 | 14.43 | 19.85 |  |
| 1 | 7 | 16 | 1766.73 | 11.48 | 42.2 |  |  | 1 | 15 | 16 | 495.69 | 6.58 | 21.16 |  |
| 3 | 7 | 16 | 1527.59 | 16.22 | 38.5 |  |  | 3 | 15 | 16 | 441.82 | 12.34 | 20.85 |  |
| 5 | 7 | 16 | 573.38 | 6.1 | 23.53 |  |  | 5 | 15 | 16 | 505.72 | 7.18 | 21.44 |  |
| 7 | 7 | 16 | 817.06 | 11.41 | 27.72 |  |  | 7 | 15 | 16 | 441.62 | 7.17 | 19.92 |  |
| 0 | 8 | 16 | 22653.2 | 109.63 | 142.02 |  |  | 9 | 15 | 16 | 482.61 | 7.65 | 20.99 |  |
| 2 | 8 | 16 | 2496.22 | 18.57 | 48.74 |  |  | 11 | 15 | 16 | 410.05 | 7.58 | 19.51 |  |
| 4 | 8 | 16 | 6714.1 | 35.69 | 79.93 |  |  | 13 | 15 | 16 | 199.08 | 7.77 | 13.91 |  |
| 6 | 8 | 16 | 1002.2 | 9.01 | 31.18 |  |  | 15 | 15 | 16 | 179.35 | 12.71 | 13.2 |  |
| 8 | 8 | 16 | 11091.09 | 86.62 | 100.75 |  |  | 0 | 16 | 16 | 5060.58 | 41.97 | 66.78 |  |

| h | k | l | Fcal^2 | Fobs^2 | (Fobs^2) | |  | h | k | l | Fcal^2 | Fobs^2 | (Fobs^2) | |
| --- | --- | --- | --- | --- | --- | --- | --- | --- | --- | --- | --- | --- | --- | --- |
|  |  |  |  |  |  |  |  |  |  |  |  |  |  |  |
| 2 | 16 | 16 | 235.14 | 7.4 | 14.8 |  |  | 11 | 12 | 17 | 71.72 | 8.34 | 8.64 |  |
| 4 | 16 | 16 | 2294.75 | 24.24 | 45 |  |  | 0 | 13 | 17 | 365.85 | 6.07 | 17.98 |  |
| 6 | 16 | 16 | 441.98 | 10.44 | 20.34 |  |  | 2 | 13 | 17 | 687.6 | 7.32 | 25.35 |  |
| 8 | 16 | 16 | 3191.77 | 33.11 | 53.31 |  |  | 4 | 13 | 17 | 557.64 | 10.73 | 23.24 |  |
| 10 | 16 | 16 | 919.9 | 15.97 | 28.82 |  |  | 6 | 13 | 17 | 278.62 | 7.5 | 16.44 |  |
| 12 | 16 | 16 | 2307.82 | 29.2 | 45.1 |  |  | 8 | 13 | 17 | 537.04 | 7.99 | 21.73 |  |
| 14 | 16 | 16 | 59.77 | 11.76 | 8.7 |  |  | 10 | 13 | 17 | 163.21 | 8.25 | 12 |  |
| 0 | 1 | 17 | 487.86 | 4.97 | 22.32 |  |  | 12 | 13 | 17 | 448.05 | 9.32 | 19.67 |  |
| 1 | 2 | 17 | 1657.92 | 10.12 | 41.13 |  |  | 1 | 14 | 17 | 116.04 | 7.4 | 10.49 |  |
| 0 | 3 | 17 | 2033.72 | 12.64 | 44.08 |  |  | 3 | 14 | 17 | 161.94 | 5.02 | 12.64 |  |
| 2 | 3 | 17 | 689.03 | 6.05 | 26.02 |  |  | 5 | 14 | 17 | 957.69 | 9.21 | 29.31 |  |
| 1 | 4 | 17 | 479.84 | 5.24 | 21.94 |  |  | 7 | 14 | 17 | 850.08 | 9.46 | 27.5 |  |
| 3 | 4 | 17 | 467.74 | 5.24 | 21.62 |  |  | 9 | 14 | 17 | 396.39 | 7.58 | 18.62 |  |
| 0 | 5 | 17 | 3079.95 | 26.41 | 56 |  |  | 11 | 14 | 17 | 144.1 | 6.5 | 11.22 |  |
| 2 | 5 | 17 | 665.09 | 6.52 | 25.04 |  |  | 13 | 14 | 17 | 112.92 | 6.84 | 10.22 |  |
| 4 | 5 | 17 | 1878.39 | 11.75 | 42.45 |  |  | 0 | 15 | 17 | 677.24 | 7.82 | 25.43 |  |
| 1 | 6 | 17 | 2191.84 | 13.66 | 46.81 |  |  | 2 | 15 | 17 | 728.83 | 9.22 | 25.65 |  |
| 3 | 6 | 17 | 2498.01 | 17.71 | 49.72 |  |  | 4 | 15 | 17 | 233.52 | 6.23 | 14.43 |  |
| 5 | 6 | 17 | 688.75 | 5.98 | 26.72 |  |  | 6 | 15 | 17 | 247.01 | 6.31 | 15.63 |  |
| 0 | 7 | 17 | 2588.1 | 15.37 | 49.55 |  |  | 8 | 15 | 17 | 240.24 | 7.24 | 14.98 |  |
| 2 | 7 | 17 | 1115.26 | 8.14 | 32.48 |  |  | 10 | 15 | 17 | 213.35 | 7.42 | 14.2 |  |
| 4 | 7 | 17 | 268.29 | 5.12 | 17.08 |  |  | 12 | 15 | 17 | 81.2 | 7.11 | 8.02 |  |
| 6 | 7 | 17 | 1136.97 | 9.15 | 32.86 |  |  | 14 | 15 | 17 | 398.94 | 16.23 | 19.26 |  |
| 1 | 8 | 17 | 2197.93 | 14.53 | 45.5 |  |  | 1 | 16 | 17 | 448.64 | 16.33 | 20.23 |  |
| 3 | 8 | 17 | 1591.38 | 10.79 | 38.75 |  |  | 3 | 16 | 17 | 210.21 | 5.7 | 13.8 |  |
| 5 | 8 | 17 | 1166.79 | 9.63 | 33.69 |  |  | 5 | 16 | 17 | 113.88 | 5.49 | 10.35 |  |
| 7 | 8 | 17 | 753.97 | 14.26 | 27.05 |  |  | 7 | 16 | 17 | 266.27 | 10.06 | 15.75 |  |
| 0 | 9 | 17 | 908.62 | 13.7 | 29.23 |  |  | 9 | 16 | 17 | 506.58 | 9.19 | 21.71 |  |
| 2 | 9 | 17 | 1440 | 9.84 | 37.13 |  |  | 11 | 16 | 17 | 522.4 | 8.92 | 21.85 |  |
| 4 | 9 | 17 | 291.25 | 4.16 | 15.45 |  |  | 13 | 16 | 17 | 322.45 | 8.78 | 17.62 |  |
| 6 | 9 | 17 | 1012.8 | 9.35 | 31.3 |  |  | 15 | 16 | 17 | 177.06 | 29.61 | 14.54 |  |
| 8 | 9 | 17 | 736.54 | 13.88 | 26.29 |  |  | 0 | 17 | 17 | 944.84 | 12.93 | 28.67 |  |
| 1 | 10 | 17 | 1580.89 | 10.58 | 37.98 |  |  | 2 | 17 | 17 | 833.25 | 11.97 | 26.26 |  |
| 3 | 10 | 17 | 133.15 | 4.09 | 11.13 |  |  | 4 | 17 | 17 | 204.19 | 9.67 | 13.77 |  |
| 5 | 10 | 17 | 421.36 | 9.49 | 19.68 |  |  | 6 | 17 | 17 | 107.48 | 9.67 | 9.85 |  |
| 7 | 10 | 17 | 574.15 | 7.32 | 22.66 |  |  | 8 | 17 | 17 | 117.86 | 10.24 | 10.65 |  |
| 9 | 10 | 17 | 500.62 | 9.31 | 21.78 |  |  | 10 | 17 | 17 | 283.31 | 11.01 | 16.49 |  |
| 0 | 11 | 17 | 281.76 | 4.97 | 16.85 |  |  | 12 | 17 | 17 | 23.02 | 11.38 | 4.86 |  |
| 2 | 11 | 17 | 666.35 | 6.45 | 25.25 |  |  | 14 | 17 | 17 | 471.62 | 24.69 | 22.89 |  |
| 4 | 11 | 17 | 1192.31 | 9.35 | 32.89 |  |  | 0 | 0 | 18 | 13.18 | 6.64 | 3.16 |  |
| 6 | 11 | 17 | 136.38 | 5.03 | 11.76 |  |  | 1 | 1 | 18 | 2468.34 | 22.03 | 49.06 |  |
| 8 | 11 | 17 | 832.24 | 9.34 | 27.85 |  |  | 0 | 2 | 18 | 1584.65 | 10.93 | 39.4 |  |
| 10 | 11 | 17 | 790.82 | 10.26 | 26.97 |  |  | 2 | 2 | 18 | 7807.36 | 59.8 | 85.92 |  |
| 1 | 12 | 17 | 204.16 | 4.9 | 14.2 |  |  | 1 | 3 | 18 | 1015.66 | 8.75 | 31.48 |  |
| 3 | 12 | 17 | 1247.71 | 9.83 | 34.37 |  |  | 3 | 3 | 18 | 1554.54 | 16.03 | 38.96 |  |
| 5 | 12 | 17 | 360.76 | 5.95 | 19.66 |  |  | 0 | 4 | 18 | 1400.13 | 18.11 | 36.36 |  |
| 7 | 12 | 17 | 227.47 | 6.24 | 14.32 |  |  | 2 | 4 | 18 | 1172.15 | 9.43 | 33.25 |  |
| 9 | 12 | 17 | 242.87 | 6.51 | 14.84 |  |  | 4 | 4 | 18 | 1034.72 | 10.85 | 31.77 |  |

| h | k | l | Fcal^2 | Fobs^2 | (Fobs^2) | |  | h | k | l | Fcal^2 | Fobs^2 | (Fobs^2) | |
| --- | --- | --- | --- | --- | --- | --- | --- | --- | --- | --- | --- | --- | --- | --- |
|  |  |  |  |  |  |  |  |  |  |  |  |  |  |  |
| 1 | 5 | 18 | 1148.88 | 8.28 | 34.38 |  |  | 2 | 14 | 18 | 3449.59 | 22.09 | 55.56 |  |
| 3 | 5 | 18 | 1165.15 | 8.82 | 33.34 |  |  | 4 | 14 | 18 | 486.09 | 7.1 | 21.38 |  |
| 5 | 5 | 18 | 1716.28 | 16.98 | 39.23 |  |  | 6 | 14 | 18 | 2707.25 | 32.5 | 49.51 |  |
| 0 | 6 | 18 | 319.75 | 4.76 | 18.59 |  |  | 8 | 14 | 18 | 557.93 | 8.53 | 22.33 |  |
| 2 | 6 | 18 | 9679.57 | 49.43 | 94.78 |  |  | 10 | 14 | 18 | 1782.87 | 15.16 | 39.68 |  |
| 4 | 6 | 18 | 1445.24 | 10.24 | 37.06 |  |  | 12 | 14 | 18 | 175.77 | 7.63 | 12.93 |  |
| 6 | 6 | 18 | 5828.56 | 45.12 | 74.69 |  |  | 14 | 14 | 18 | 1692.1 | 22.86 | 39.97 |  |
| 1 | 7 | 18 | 1271.16 | 8.88 | 34.78 |  |  | 1 | 15 | 18 | 436.28 | 6.71 | 19.91 |  |
| 3 | 7 | 18 | 371.84 | 4.97 | 18.79 |  |  | 3 | 15 | 18 | 276.74 | 6.36 | 16 |  |
| 5 | 7 | 18 | 747.08 | 8.56 | 27.42 |  |  | 5 | 15 | 18 | 275.46 | 6.57 | 16.07 |  |
| 7 | 7 | 18 | 833.01 | 10.08 | 28.18 |  |  | 7 | 15 | 18 | 369.42 | 7.71 | 18.88 |  |
| 0 | 8 | 18 | 2130.59 | 13.3 | 44.42 |  |  | 9 | 15 | 18 | 332.59 | 7.45 | 18.04 |  |
| 2 | 8 | 18 | 675.44 | 6.18 | 24.82 |  |  | 11 | 15 | 18 | 340.91 | 7.71 | 17 |  |
| 4 | 8 | 18 | 552.43 | 6.11 | 22.98 |  |  | 13 | 15 | 18 | 182.11 | 7.98 | 13.36 |  |
| 6 | 8 | 18 | 728.2 | 7.12 | 26.26 |  |  | 15 | 15 | 18 | 88.24 | 24.28 | 9.69 |  |
| 8 | 8 | 18 | 384.69 | 8.16 | 19.47 |  |  | 0 | 16 | 18 | 1097.26 | 10.55 | 30.62 |  |
| 1 | 9 | 18 | 784.33 | 6.99 | 26.7 |  |  | 2 | 16 | 18 | 601.44 | 7.52 | 23.07 |  |
| 3 | 9 | 18 | 523.23 | 5.9 | 21.11 |  |  | 4 | 16 | 18 | 137.29 | 5.83 | 11.1 |  |
| 5 | 9 | 18 | 461.77 | 6.04 | 21.46 |  |  | 6 | 16 | 18 | 43.16 | 6.44 | 6.97 |  |
| 7 | 9 | 18 | 480.09 | 6.38 | 21.7 |  |  | 8 | 16 | 18 | 129.79 | 10.53 | 11.25 |  |
| 9 | 9 | 18 | 481.93 | 12.34 | 20.56 |  |  | 10 | 16 | 18 | 82.84 | 6.7 | 8.89 |  |
| 0 | 10 | 18 | 1796.36 | 12.07 | 40.3 |  |  | 12 | 16 | 18 | 87.44 | 8.03 | 9.86 |  |
| 2 | 10 | 18 | 5941.4 | 31.62 | 73.2 |  |  | 14 | 16 | 18 | 164.93 | 18.26 | 13.01 |  |
| 4 | 10 | 18 | 489.95 | 6.11 | 21.44 |  |  | 1 | 17 | 18 | 249.97 | 6.57 | 15.42 |  |
| 6 | 10 | 18 | 4280.99 | 25.09 | 63.17 |  |  | 3 | 17 | 18 | 163.02 | 6.17 | 12.39 |  |
| 8 | 10 | 18 | 228.97 | 6.35 | 14.52 |  |  | 5 | 17 | 18 | 246.88 | 9.87 | 15.24 |  |
| 10 | 10 | 18 | 4146.39 | 48 | 61.23 |  |  | 7 | 17 | 18 | 273.73 | 7.64 | 16.37 |  |
| 1 | 11 | 18 | 444.11 | 7.41 | 20.87 |  |  | 9 | 17 | 18 | 138.26 | 6.84 | 12.16 |  |
| 3 | 11 | 18 | 1439.1 | 10.71 | 35.96 |  |  | 11 | 17 | 18 | 41.25 | 10.92 | 6.79 |  |
| 5 | 11 | 18 | 751.59 | 11.5 | 26.6 |  |  | 13 | 17 | 18 | 20.73 | 18.61 | 4.59 |  |
| 7 | 11 | 18 | 942.65 | 9.75 | 29.19 |  |  | 0 | 18 | 18 | 7.82 | 7.58 | 3.92 |  |
| 9 | 11 | 18 | 348.18 | 7.37 | 17.9 |  |  | 2 | 18 | 18 | 1743.02 | 18.29 | 40.3 |  |
| 11 | 11 | 18 | 0.81 | 9.29 | 0.83 |  |  | 4 | 18 | 18 | 371.76 | 10.63 | 18.58 |  |
| 0 | 12 | 18 | 46.5 | 4.22 | 6.14 |  |  | 6 | 18 | 18 | 1643.85 | 19.05 | 39.45 |  |
| 2 | 12 | 18 | 641.42 | 6.92 | 24.14 |  |  | 8 | 18 | 18 | 165.26 | 12.52 | 13.81 |  |
| 4 | 12 | 18 | 484.12 | 9.97 | 21.46 |  |  | 10 | 18 | 18 | 636.46 | 31.15 | 26.05 |  |
| 6 | 12 | 18 | 457.37 | 11.87 | 20.87 |  |  | 12 | 18 | 18 | 21.25 | 28.44 | 6.34 |  |
| 8 | 12 | 18 | 532.92 | 7.79 | 21.87 |  |  | 0 | 1 | 19 | 524.46 | 5.98 | 23.01 |  |
| 10 | 12 | 18 | 460.38 | 11.58 | 20.26 |  |  | 1 | 2 | 19 | 486.43 | 5.37 | 21.85 |  |
| 12 | 12 | 18 | 212.87 | 10.24 | 13.31 |  |  | 0 | 3 | 19 | 1.61 | 3.42 | 1.48 |  |
| 1 | 13 | 18 | 170.71 | 4.82 | 12.62 |  |  | 2 | 3 | 19 | 1081.94 | 8.47 | 32.15 |  |
| 3 | 13 | 18 | 1198.33 | 9.89 | 33.01 |  |  | 1 | 4 | 19 | 1637.54 | 10.65 | 39.76 |  |
| 5 | 13 | 18 | 333.49 | 6.57 | 17.71 |  |  | 3 | 4 | 19 | 1773.14 | 11.67 | 40.97 |  |
| 7 | 13 | 18 | 188.49 | 6.64 | 13.11 |  |  | 0 | 5 | 19 | 714.07 | 6.65 | 26.66 |  |
| 9 | 13 | 18 | 322.94 | 7.54 | 17.28 |  |  | 2 | 5 | 19 | 1578.66 | 11.12 | 37.95 |  |
| 11 | 13 | 18 | 269.7 | 7.18 | 16.11 |  |  | 4 | 5 | 19 | 372.36 | 5.03 | 18.63 |  |
| 13 | 13 | 18 | 695.99 | 15.77 | 24.67 |  |  | 1 | 6 | 19 | 415.18 | 14.62 | 20.42 |  |
| 0 | 14 | 18 | 27.84 | 4.62 | 4.77 |  |  | 3 | 6 | 19 | 739.31 | 7.79 | 26.57 |  |

| h | k | l | Fcal^2 | Fobs^2 | (Fobs^2) | |  | h | k | l | Fcal^2 | Fobs^2 | (Fobs^2) | |
| --- | --- | --- | --- | --- | --- | --- | --- | --- | --- | --- | --- | --- | --- | --- |
|  |  |  |  |  |  |  |  |  |  |  |  |  |  |  |
| 5 | 6 | 19 | 512.91 | 7.5 | 22.76 |  |  | 6 | 15 | 19 | 336.17 | 7.38 | 17.96 |  |
| 0 | 7 | 19 | 1252.31 | 9.41 | 33.18 |  |  | 8 | 15 | 19 | 205.88 | 7.23 | 14.6 |  |
| 2 | 7 | 19 | 1022.9 | 8 | 30.78 |  |  | 10 | 15 | 19 | 16.81 | 6.7 | 2.48 |  |
| 4 | 7 | 19 | 459.1 | 5.71 | 21.32 |  |  | 12 | 15 | 19 | 263.57 | 10.25 | 16.44 |  |
| 6 | 7 | 19 | 437.25 | 6.1 | 20.19 |  |  | 14 | 15 | 19 | 159.5 | 19.1 | 12.44 |  |
| 1 | 8 | 19 | 1219.96 | 9.09 | 34.08 |  |  | 1 | 16 | 19 | 200.6 | 6.24 | 13.75 |  |
| 3 | 8 | 19 | 275.62 | 5.03 | 15.93 |  |  | 3 | 16 | 19 | 118.88 | 16.69 | 10.6 |  |
| 5 | 8 | 19 | 512.44 | 6.72 | 22.28 |  |  | 5 | 16 | 19 | 403.48 | 10.72 | 19.36 |  |
| 7 | 8 | 19 | 316.5 | 5.3 | 17.31 |  |  | 7 | 16 | 19 | 316.33 | 7.77 | 18.12 |  |
| 0 | 9 | 19 | 451.55 | 5.7 | 20.04 |  |  | 9 | 16 | 19 | 69.74 | 7.1 | 9.27 |  |
| 2 | 9 | 19 | 296.52 | 5.03 | 17.14 |  |  | 11 | 16 | 19 | 12.16 | 9.63 | 2.51 |  |
| 4 | 9 | 19 | 818.42 | 7.59 | 27.53 |  |  | 13 | 16 | 19 | 10.17 | 15.82 | 3.36 |  |
| 6 | 9 | 19 | 570.12 | 6.98 | 22.78 |  |  | 0 | 17 | 19 | 517.55 | 7.99 | 21.44 |  |
| 8 | 9 | 19 | 329.34 | 9.49 | 18.4 |  |  | 2 | 17 | 19 | 225.61 | 6.84 | 15.21 |  |
| 1 | 10 | 19 | 910.48 | 8 | 28.11 |  |  | 4 | 17 | 19 | 43.29 | 6.57 | 7.24 |  |
| 3 | 10 | 19 | 894.68 | 8.13 | 28.66 |  |  | 6 | 17 | 19 | 158.29 | 7.44 | 12.94 |  |
| 5 | 10 | 19 | 485.43 | 8.07 | 21.13 |  |  | 8 | 17 | 19 | 129.39 | 9.05 | 11.28 |  |
| 7 | 10 | 19 | 131.76 | 5.46 | 11.69 |  |  | 10 | 17 | 19 | 0.28 | 15.24 | 4.95 |  |
| 9 | 10 | 19 | 247.41 | 6.3 | 15.95 |  |  | 12 | 17 | 19 | 115.76 | 17.18 | 12.86 |  |
| 0 | 11 | 19 | 119.68 | 4.69 | 10.5 |  |  | 1 | 18 | 19 | 57.33 | 6.3 | 8.27 |  |
| 2 | 11 | 19 | 193.19 | 4.69 | 13.64 |  |  | 3 | 18 | 19 | 221.15 | 8.17 | 15.28 |  |
| 4 | 11 | 19 | 778.38 | 9.31 | 26.76 |  |  | 5 | 18 | 19 | 184.08 | 19.25 | 13.74 |  |
| 6 | 11 | 19 | 481.49 | 6.77 | 21.69 |  |  | 7 | 18 | 19 | 98.95 | 15.65 | 9.99 |  |
| 8 | 11 | 19 | 521.36 | 8.19 | 21.94 |  |  | 9 | 18 | 19 | 53.34 | 18.55 | 8.08 |  |
| 10 | 11 | 19 | 828.16 | 15.39 | 26.32 |  |  | 11 | 18 | 19 | 59.15 | 23.16 | 9.39 |  |
| 1 | 12 | 19 | 86.31 | 4.88 | 8.77 |  |  | 0 | 19 | 19 | 3.3 | 18.01 | 0.75 |  |
| 3 | 12 | 19 | 672.84 | 7.79 | 24.74 |  |  | 2 | 19 | 19 | 89.01 | 22.76 | 10.07 |  |
| 5 | 12 | 19 | 317.53 | 6.16 | 17.44 |  |  | 4 | 19 | 19 | 278.48 | 20.87 | 16.4 |  |
| 7 | 12 | 19 | 639.29 | 8.66 | 23.62 |  |  | 6 | 19 | 19 | 259.13 | 28.47 | 16.9 |  |
| 9 | 12 | 19 | 544.25 | 8.05 | 21.55 |  |  | 8 | 19 | 19 | 49.84 | 32.99 | 7.45 |  |
| 11 | 12 | 19 | 68.92 | 7.51 | 8.6 |  |  | 10 | 19 | 19 | 82.46 | 29.02 | 11.37 |  |
| 0 | 13 | 19 | 220.09 | 5.37 | 14.32 |  |  | 0 | 0 | 20 | 4870.75 | 53.23 | 67.28 |  |
| 2 | 13 | 19 | 315.05 | 14.04 | 16.86 |  |  | 1 | 1 | 20 | 245.31 | 7.02 | 15.08 |  |
| 4 | 13 | 19 | 521.97 | 7.31 | 21.88 |  |  | 0 | 2 | 20 | 257.25 | 5.17 | 15.8 |  |
| 6 | 13 | 19 | 424.79 | 7.85 | 20.41 |  |  | 2 | 2 | 20 | 1076.52 | 11.04 | 31.98 |  |
| 8 | 13 | 19 | 43.9 | 6.17 | 6.73 |  |  | 1 | 3 | 20 | 909.31 | 7.87 | 29.25 |  |
| 10 | 13 | 19 | 273.82 | 7.45 | 14.88 |  |  | 3 | 3 | 20 | 426.75 | 8.74 | 20.05 |  |
| 12 | 13 | 19 | 340.95 | 7.92 | 17.99 |  |  | 0 | 4 | 20 | 5148.89 | 28.04 | 69.24 |  |
| 1 | 14 | 19 | 493.19 | 6.91 | 20.62 |  |  | 2 | 4 | 20 | 908.46 | 8.07 | 29.13 |  |
| 3 | 14 | 19 | 201.22 | 10.25 | 14.08 |  |  | 4 | 4 | 20 | 9046.8 | 69.07 | 90.7 |  |
| 5 | 14 | 19 | 200.24 | 6.26 | 14.19 |  |  | 1 | 5 | 20 | 559.29 | 6.11 | 23.23 |  |
| 7 | 14 | 19 | 326.78 | 7.04 | 17.48 |  |  | 3 | 5 | 20 | 1321.88 | 10.23 | 35.31 |  |
| 9 | 14 | 19 | 218.46 | 7.04 | 14.58 |  |  | 5 | 5 | 20 | 2068.37 | 20.81 | 43.71 |  |
| 11 | 14 | 19 | 201.44 | 8.06 | 14.28 |  |  | 0 | 6 | 20 | 613.96 | 6.44 | 23.56 |  |
| 13 | 14 | 19 | 114.09 | 8.78 | 11.01 |  |  | 2 | 6 | 20 | 749.93 | 7.05 | 26.22 |  |
| 0 | 15 | 19 | 1449.91 | 11.49 | 35.44 |  |  | 4 | 6 | 20 | 1318.02 | 14.47 | 34.98 |  |
| 2 | 15 | 19 | 410.57 | 15.47 | 19.33 |  |  | 6 | 6 | 20 | 112 | 6.45 | 10.1 |  |
| 4 | 15 | 19 | 25.79 | 5.76 | 4.58 |  |  | 1 | 7 | 20 | 157.78 | 4.82 | 12.6 |  |

| h | k | l | Fcal^2 | Fobs^2 | (Fobs^2) | |  | h | k | l | Fcal^2 | Fobs^2 | (Fobs^2) | |
| --- | --- | --- | --- | --- | --- | --- | --- | --- | --- | --- | --- | --- | --- | --- |
|  |  |  |  |  |  |  |  |  |  |  |  |  |  |  |
| 3 | 7 | 20 | 1001.12 | 8.56 | 30.5 |  |  | 3 | 15 | 20 | 423.66 | 16.8 | 20.16 |  |
| 5 | 7 | 20 | 574.98 | 6.85 | 23.44 |  |  | 5 | 15 | 20 | 174.35 | 9.58 | 13.72 |  |
| 7 | 7 | 20 | 426.04 | 10.44 | 19.66 |  |  | 7 | 15 | 20 | 108.31 | 6.77 | 10.61 |  |
| 0 | 8 | 20 | 4382.45 | 25.01 | 62.59 |  |  | 9 | 15 | 20 | 67.58 | 7.64 | 7.89 |  |
| 2 | 8 | 20 | 360.06 | 5.64 | 18.58 |  |  | 11 | 15 | 20 | 76.32 | 10.05 | 9.25 |  |
| 4 | 8 | 20 | 3934.02 | 23.29 | 59.94 |  |  | 13 | 15 | 20 | 102.69 | 18.68 | 11.68 |  |
| 6 | 8 | 20 | 149.16 | 5.56 | 12.69 |  |  | 0 | 16 | 20 | 1745.45 | 13.47 | 40.58 |  |
| 8 | 8 | 20 | 2204.17 | 24.62 | 45.96 |  |  | 2 | 16 | 20 | 83.11 | 7.11 | 9.82 |  |
| 1 | 9 | 20 | 242.01 | 5.23 | 14.53 |  |  | 4 | 16 | 20 | 1536.74 | 15.81 | 38.16 |  |
| 3 | 9 | 20 | 548.59 | 6.58 | 22.73 |  |  | 6 | 16 | 20 | 269.86 | 18.22 | 16.65 |  |
| 5 | 9 | 20 | 240.65 | 5.29 | 15.19 |  |  | 8 | 16 | 20 | 794.54 | 13.77 | 28.15 |  |
| 7 | 9 | 20 | 126.96 | 5.3 | 11.59 |  |  | 10 | 16 | 20 | 18.7 | 12.06 | 5.18 |  |
| 9 | 9 | 20 | 647.01 | 13.68 | 24.69 |  |  | 12 | 16 | 20 | 458.58 | 25.73 | 23.01 |  |
| 0 | 10 | 20 | 152.27 | 5.09 | 11.87 |  |  | 1 | 17 | 20 | 19.2 | 6.3 | 6.11 |  |
| 2 | 10 | 20 | 326.34 | 5.69 | 18.24 |  |  | 3 | 17 | 20 | 356.67 | 7.98 | 19.35 |  |
| 4 | 10 | 20 | 358.4 | 11.77 | 18.14 |  |  | 5 | 17 | 20 | 193.04 | 11.99 | 13.89 |  |
| 6 | 10 | 20 | 772 | 10.84 | 27.24 |  |  | 7 | 17 | 20 | 48.67 | 13.3 | 6.38 |  |
| 8 | 10 | 20 | 607.69 | 8.98 | 22.67 |  |  | 9 | 17 | 20 | 13.49 | 12.66 | 4.28 |  |
| 10 | 10 | 20 | 395.74 | 10.44 | 18.59 |  |  | 11 | 17 | 20 | 36.62 | 19.64 | 5.63 |  |
| 1 | 11 | 20 | 826.25 | 8.13 | 26.7 |  |  | 0 | 18 | 20 | 43.9 | 13.34 | 6.84 |  |
| 3 | 11 | 20 | 446.47 | 6.38 | 19.82 |  |  | 2 | 18 | 20 | 60.91 | 13.21 | 8.6 |  |
| 5 | 11 | 20 | 403.1 | 6.58 | 18.82 |  |  | 4 | 18 | 20 | 272.9 | 16.36 | 16.86 |  |
| 7 | 11 | 20 | 65.7 | 5.75 | 8.45 |  |  | 6 | 18 | 20 | 164.85 | 18.22 | 13.83 |  |
| 9 | 11 | 20 | 313.78 | 7.1 | 16.94 |  |  | 8 | 18 | 20 | 62.44 | 17.33 | 9.15 |  |
| 11 | 11 | 20 | 899.48 | 15.59 | 28.08 |  |  | 10 | 18 | 20 | 39.92 | 18.84 | 10.34 |  |
| 0 | 12 | 20 | 2386.05 | 15.79 | 45.19 |  |  | 1 | 19 | 20 | 0.67 | 76.25 | 12.15 |  |
| 2 | 12 | 20 | 873.62 | 8.47 | 27.77 |  |  | 3 | 19 | 20 | 133.82 | 30.3 | 11.93 |  |
| 4 | 12 | 20 | 3515.62 | 21.88 | 55.85 |  |  | 5 | 19 | 20 | 0 | 0.13 | 10.02 |  |
| 6 | 12 | 20 | 197.27 | 6.02 | 13.36 |  |  | 7 | 19 | 20 | 92.11 | 26.45 | 11.34 |  |
| 8 | 12 | 20 | 2519.25 | 18.95 | 47.69 |  |  | 9 | 19 | 20 | 0 | 0.19 | 10.29 |  |
| 10 | 12 | 20 | 294.59 | 7.85 | 16.71 |  |  | 4 | 20 | 20 | 982.59 | 63.3 | 29.66 |  |
| 12 | 12 | 20 | 2339.52 | 30.74 | 46.58 |  |  | 6 | 20 | 20 | 28.51 | 46.08 | 8.59 |  |
| 1 | 13 | 20 | 715.1 | 7.86 | 24.51 |  |  | 8 | 20 | 20 | 0 | 0.19 | 25.9 |  |
| 3 | 13 | 20 | 144.19 | 5.37 | 12.41 |  |  | 0 | 1 | 21 | 841.08 | 7.46 | 28.44 |  |
| 5 | 13 | 20 | 175.85 | 6.24 | 12.98 |  |  | 1 | 2 | 21 | 721.16 | 7.79 | 25.9 |  |
| 7 | 13 | 20 | 320.02 | 7.37 | 17.09 |  |  | 0 | 3 | 21 | 487.22 | 6.31 | 21.63 |  |
| 9 | 13 | 20 | 483.08 | 8.45 | 21.32 |  |  | 2 | 3 | 21 | 447.98 | 6.04 | 20.85 |  |
| 11 | 13 | 20 | 414.45 | 9.12 | 20.16 |  |  | 1 | 4 | 21 | 445.64 | 6.04 | 20.6 |  |
| 13 | 13 | 20 | 166.87 | 13.47 | 13.11 |  |  | 3 | 4 | 21 | 896.6 | 8.4 | 28.67 |  |
| 0 | 14 | 20 | 371.43 | 6.57 | 18.06 |  |  | 0 | 5 | 21 | 174.92 | 4.69 | 12.28 |  |
| 2 | 14 | 20 | 259.77 | 13.19 | 15.34 |  |  | 2 | 5 | 21 | 827.86 | 8.2 | 27.58 |  |
| 4 | 14 | 20 | 389.12 | 7.11 | 19.26 |  |  | 4 | 5 | 21 | 642.53 | 6.92 | 24.21 |  |
| 6 | 14 | 20 | 386.31 | 7.98 | 19 |  |  | 1 | 6 | 21 | 262.59 | 5.23 | 15.83 |  |
| 8 | 14 | 20 | 154.97 | 6.77 | 12.92 |  |  | 3 | 6 | 21 | 746.85 | 8 | 26.3 |  |
| 10 | 14 | 20 | 30.04 | 6.37 | 5.46 |  |  | 5 | 6 | 21 | 438.1 | 6.22 | 19.99 |  |
| 12 | 14 | 20 | 328.02 | 26.47 | 17.69 |  |  | 0 | 7 | 21 | 512.9 | 6.23 | 21.37 |  |
| 14 | 14 | 20 | 134.88 | 29.02 | 11.98 |  |  | 2 | 7 | 21 | 335.19 | 5.64 | 17.98 |  |
| 1 | 15 | 20 | 80 | 5.9 | 8.74 |  |  | 4 | 7 | 21 | 1091.6 | 9.68 | 30.87 |  |

| h | k | l | Fcal^2 | Fobs^2 | (Fobs^2) | |  | h | k | l | Fcal^2 | Fobs^2 | (Fobs^2) | |
| --- | --- | --- | --- | --- | --- | --- | --- | --- | --- | --- | --- | --- | --- | --- |
|  |  |  |  |  |  |  |  |  |  |  |  |  |  |  |
| 6 | 7 | 21 | 161.7 | 4.83 | 12.19 |  |  | 1 | 16 | 21 | 297.32 | 7.04 | 17.07 |  |
| 1 | 8 | 21 | 523.73 | 6.58 | 21.59 |  |  | 3 | 16 | 21 | 0 | 10.14 | 0.66 |  |
| 3 | 8 | 21 | 33.94 | 4.62 | 5.52 |  |  | 5 | 16 | 21 | 77.63 | 11.17 | 8.48 |  |
| 5 | 8 | 21 | 25.19 | 5.02 | 4.99 |  |  | 7 | 16 | 21 | 127.36 | 18.11 | 12.11 |  |
| 7 | 8 | 21 | 201.28 | 5.57 | 14.13 |  |  | 9 | 16 | 21 | 108.04 | 13.54 | 10.59 |  |
| 0 | 9 | 21 | 459.18 | 6.37 | 20.48 |  |  | 11 | 16 | 21 | 30 | 18.61 | 6.87 |  |
| 2 | 9 | 21 | 282.63 | 5.43 | 16.45 |  |  | 0 | 17 | 21 | 56.31 | 15 | 8.31 |  |
| 4 | 9 | 21 | 710.63 | 7.86 | 25.37 |  |  | 2 | 17 | 21 | 100.89 | 14.07 | 10.9 |  |
| 6 | 9 | 21 | 195.16 | 5.63 | 13.55 |  |  | 4 | 17 | 21 | 215.29 | 16.99 | 15.1 |  |
| 8 | 9 | 21 | 430.34 | 8.32 | 19.87 |  |  | 6 | 17 | 21 | 44 | 14.61 | 7.06 |  |
| 1 | 10 | 21 | 226.66 | 5.84 | 14.19 |  |  | 8 | 17 | 21 | 118.23 | 17.14 | 11.89 |  |
| 3 | 10 | 21 | 263.25 | 5.84 | 15.59 |  |  | 10 | 17 | 21 | 57.97 | 36.34 | 9.49 |  |
| 5 | 10 | 21 | 451.47 | 6.91 | 20.3 |  |  | 1 | 18 | 21 | 88.3 | 31.76 | 11 |  |
| 7 | 10 | 21 | 383.42 | 11.2 | 19.7 |  |  | 3 | 18 | 21 | 0.88 | 83.67 | 16.77 |  |
| 9 | 10 | 21 | 321.04 | 8.1 | 17.28 |  |  | 5 | 18 | 21 | 124.43 | 19.82 | 11.8 |  |
| 0 | 11 | 21 | 15.59 | 4.62 | 3.41 |  |  | 7 | 18 | 21 | 152.93 | 32.85 | 14.18 |  |
| 2 | 11 | 21 | 487.94 | 6.75 | 20.86 |  |  | 4 | 19 | 21 | 0.44 | 58.51 | 11.67 |  |
| 4 | 11 | 21 | 88.59 | 6.26 | 10.54 |  |  | 6 | 19 | 21 | 69 | 29.61 | 9.97 |  |
| 6 | 11 | 21 | 447.21 | 9.21 | 20.59 |  |  | 8 | 19 | 21 | 0 | 0.19 | 8.02 |  |
| 8 | 11 | 21 | 383.16 | 7.71 | 18.39 |  |  | 0 | 0 | 22 | 3315.69 | 37.95 | 56.09 |  |
| 10 | 11 | 21 | 240.34 | 8.58 | 14.77 |  |  | 1 | 1 | 22 | 36.05 | 6.45 | 5.21 |  |
| 1 | 12 | 21 | 367.34 | 10.34 | 18.58 |  |  | 0 | 2 | 22 | 112.18 | 5.23 | 10.19 |  |
| 3 | 12 | 21 | 602.2 | 7.58 | 22.77 |  |  | 2 | 2 | 22 | 4048.72 | 37.06 | 61.08 |  |
| 5 | 12 | 21 | 509.15 | 9.02 | 21.48 |  |  | 1 | 3 | 22 | 649.17 | 7.7 | 24.76 |  |
| 7 | 12 | 21 | 321.76 | 7.98 | 17.17 |  |  | 3 | 3 | 22 | 639.44 | 10.45 | 24.09 |  |
| 9 | 12 | 21 | 152.09 | 6.97 | 12.44 |  |  | 0 | 4 | 22 | 55.94 | 4.62 | 7.15 |  |
| 11 | 12 | 21 | 124.71 | 9.01 | 11.69 |  |  | 2 | 4 | 22 | 675.36 | 7.46 | 24.94 |  |
| 0 | 13 | 21 | 18.47 | 5.56 | 4.2 |  |  | 4 | 4 | 22 | 886.39 | 12.17 | 28.43 |  |
| 2 | 13 | 21 | 195.3 | 7.68 | 13.21 |  |  | 1 | 5 | 22 | 406.8 | 6.04 | 19.11 |  |
| 4 | 13 | 21 | 518.05 | 7.58 | 21.64 |  |  | 3 | 5 | 22 | 365.34 | 6.04 | 18.38 |  |
| 6 | 13 | 21 | 357.7 | 8 | 18.99 |  |  | 5 | 5 | 22 | 443.38 | 9.11 | 20.47 |  |
| 8 | 13 | 21 | 57.57 | 7.4 | 7.8 |  |  | 0 | 6 | 22 | 881.79 | 8.2 | 28.48 |  |
| 10 | 13 | 21 | 378.33 | 10.31 | 19.09 |  |  | 2 | 6 | 22 | 3871.13 | 22.72 | 58.6 |  |
| 12 | 13 | 21 | 180.01 | 10.53 | 12.98 |  |  | 4 | 6 | 22 | 153.81 | 5.03 | 12.17 |  |
| 1 | 14 | 21 | 107.31 | 5.7 | 10.41 |  |  | 6 | 6 | 22 | 2280.26 | 21.38 | 45.31 |  |
| 3 | 14 | 21 | 532.84 | 12.25 | 22.39 |  |  | 1 | 7 | 22 | 791.11 | 9.12 | 26.59 |  |
| 5 | 14 | 21 | 198.25 | 6.64 | 14.72 |  |  | 3 | 7 | 22 | 459.6 | 8.26 | 20.12 |  |
| 7 | 14 | 21 | 311.45 | 7.71 | 17.55 |  |  | 5 | 7 | 22 | 362.16 | 6.24 | 18.2 |  |
| 9 | 14 | 21 | 76.7 | 8.45 | 8.79 |  |  | 7 | 7 | 22 | 276.8 | 9.3 | 16.87 |  |
| 11 | 14 | 21 | 38.3 | 9.79 | 6.84 |  |  | 0 | 8 | 22 | 190.92 | 5.23 | 13.18 |  |
| 13 | 14 | 21 | 104.44 | 32.85 | 10.9 |  |  | 2 | 8 | 22 | 635.39 | 7.32 | 23.95 |  |
| 0 | 15 | 21 | 73.51 | 7.87 | 8.58 |  |  | 4 | 8 | 22 | 128.61 | 6.07 | 10.39 |  |
| 2 | 15 | 21 | 114.94 | 6.36 | 10.8 |  |  | 6 | 8 | 22 | 402.45 | 7.11 | 18.84 |  |
| 4 | 15 | 21 | 435.02 | 8.25 | 20.56 |  |  | 8 | 8 | 22 | 303.2 | 9.11 | 16.75 |  |
| 6 | 15 | 21 | 52.25 | 7.42 | 7.79 |  |  | 1 | 9 | 22 | 485.59 | 6.84 | 20.99 |  |
| 8 | 15 | 21 | 62.64 | 14.6 | 8.53 |  |  | 3 | 9 | 22 | 531.9 | 7.18 | 21.9 |  |
| 10 | 15 | 21 | 145.67 | 13.82 | 12.85 |  |  | 5 | 9 | 22 | 188.08 | 9.11 | 13.23 |  |
| 12 | 15 | 21 | 73.91 | 24.21 | 10.41 |  |  | 7 | 9 | 22 | 516.9 | 9.87 | 21.55 |  |

| h | k | l | Fcal^2 | Fobs^2 | (Fobs^2) | |  | h | k | l | Fcal^2 | Fobs^2 | (Fobs^2) | |
| --- | --- | --- | --- | --- | --- | --- | --- | --- | --- | --- | --- | --- | --- | --- |
|  |  |  |  |  |  |  |  |  |  |  |  |  |  |  |
| 9 | 9 | 22 | 356.39 | 12.34 | 18.32 |  |  | 7 | 17 | 22 | 0.32 | 40.55 | 8.17 |  |
| 0 | 10 | 22 | 48.56 | 5.15 | 6.41 |  |  | 4 | 18 | 22 | 0.35 | 32.9 | 10.09 |  |
| 2 | 10 | 22 | 1918.75 | 13.89 | 40.95 |  |  | 6 | 18 | 22 | 487.09 | 64.64 | 23.2 |  |
| 4 | 10 | 22 | 298.46 | 6.83 | 16.69 |  |  | 0 | 1 | 23 | 612.82 | 8.19 | 24.05 |  |
| 6 | 10 | 22 | 2357.32 | 24.15 | 46.23 |  |  | 1 | 2 | 23 | 553.32 | 7.32 | 22.94 |  |
| 8 | 10 | 22 | 164.77 | 7.58 | 12.94 |  |  | 0 | 3 | 23 | 1102.73 | 9.41 | 32.37 |  |
| 10 | 10 | 22 | 1475.08 | 21.89 | 36.53 |  |  | 2 | 3 | 23 | 237.38 | 5.76 | 14.91 |  |
| 1 | 11 | 22 | 39.11 | 5.22 | 6.07 |  |  | 1 | 4 | 23 | 137.8 | 5.37 | 11.22 |  |
| 3 | 11 | 22 | 108.82 | 5.67 | 10.05 |  |  | 3 | 4 | 23 | 251.57 | 5.5 | 15.39 |  |
| 5 | 11 | 22 | 129.4 | 5.83 | 11.44 |  |  | 0 | 5 | 23 | 104.46 | 5.29 | 9.32 |  |
| 7 | 11 | 22 | 189.31 | 11.19 | 13.05 |  |  | 2 | 5 | 23 | 459.31 | 6.84 | 20.74 |  |
| 9 | 11 | 22 | 193.44 | 7.71 | 14.2 |  |  | 4 | 5 | 23 | 603.53 | 7.39 | 23.43 |  |
| 11 | 11 | 22 | 273.96 | 13.28 | 17.29 |  |  | 1 | 6 | 23 | 430.63 | 6.38 | 19.89 |  |
| 0 | 12 | 22 | 144.82 | 5.9 | 12.17 |  |  | 3 | 6 | 23 | 134.74 | 5.56 | 11.47 |  |
| 2 | 12 | 22 | 77.39 | 5.7 | 8.18 |  |  | 5 | 6 | 23 | 129.6 | 9.58 | 10.87 |  |
| 4 | 12 | 22 | 508.63 | 7.78 | 21.61 |  |  | 0 | 7 | 23 | 362.64 | 6.11 | 18.36 |  |
| 6 | 12 | 22 | 175.46 | 6.77 | 13.29 |  |  | 2 | 7 | 23 | 259.67 | 6.04 | 15.86 |  |
| 8 | 12 | 22 | 120.5 | 6.91 | 11.37 |  |  | 4 | 7 | 23 | 144.7 | 5.61 | 11.14 |  |
| 10 | 12 | 22 | 300.08 | 11.86 | 16.78 |  |  | 6 | 7 | 23 | 304.08 | 11.01 | 16.21 |  |
| 12 | 12 | 22 | 165.26 | 16.31 | 12.89 |  |  | 1 | 8 | 23 | 153.53 | 5.57 | 11.99 |  |
| 1 | 13 | 22 | 366.85 | 7.59 | 18.28 |  |  | 3 | 8 | 23 | 325.43 | 6.37 | 16.73 |  |
| 3 | 13 | 22 | 90.51 | 6.07 | 9.35 |  |  | 5 | 8 | 23 | 174.21 | 5.77 | 12.76 |  |
| 5 | 13 | 22 | 139.33 | 6.61 | 11.49 |  |  | 7 | 8 | 23 | 341.11 | 7.04 | 18.15 |  |
| 7 | 13 | 22 | 129.87 | 9.01 | 11.33 |  |  | 0 | 9 | 23 | 485.01 | 7.12 | 21.05 |  |
| 9 | 13 | 22 | 118.84 | 8.82 | 11.09 |  |  | 2 | 9 | 23 | 229.53 | 6.04 | 14.46 |  |
| 11 | 13 | 22 | 206.88 | 11.96 | 14.42 |  |  | 4 | 9 | 23 | 82.3 | 5.56 | 9.06 |  |
| 0 | 14 | 22 | 731.88 | 8.4 | 25.75 |  |  | 6 | 9 | 23 | 398.26 | 7.25 | 18.59 |  |
| 2 | 14 | 22 | 1593.41 | 24.47 | 37.89 |  |  | 8 | 9 | 23 | 262.61 | 7.54 | 15.66 |  |
| 4 | 14 | 22 | 112.09 | 6.97 | 10.87 |  |  | 1 | 10 | 23 | 65.04 | 5.83 | 7.89 |  |
| 6 | 14 | 22 | 1263.94 | 14.86 | 34.79 |  |  | 3 | 10 | 23 | 200.46 | 6.1 | 13.64 |  |
| 8 | 14 | 22 | 94.68 | 10.12 | 9.24 |  |  | 5 | 10 | 23 | 324.01 | 7.11 | 17.03 |  |
| 10 | 14 | 22 | 980.96 | 22.45 | 32.7 |  |  | 7 | 10 | 23 | 230.05 | 6.97 | 15.71 |  |
| 12 | 14 | 22 | 67.98 | 30.34 | 9.11 |  |  | 9 | 10 | 23 | 159.14 | 7.77 | 12.53 |  |
| 1 | 15 | 22 | 359.22 | 8.77 | 18.92 |  |  | 0 | 11 | 23 | 45.2 | 5.83 | 7.1 |  |
| 3 | 15 | 22 | 56.85 | 9.74 | 8.4 |  |  | 2 | 11 | 23 | 334.07 | 6.71 | 17.52 |  |
| 5 | 15 | 22 | 230.81 | 17.17 | 14.42 |  |  | 4 | 11 | 23 | 229.33 | 6.7 | 14.4 |  |
| 7 | 15 | 22 | 120.74 | 14.15 | 11.01 |  |  | 6 | 11 | 23 | 112.93 | 8.06 | 11.3 |  |
| 9 | 15 | 22 | 69.91 | 15.21 | 8.3 |  |  | 8 | 11 | 23 | 80.97 | 8.44 | 8.79 |  |
| 11 | 15 | 22 | 67.81 | 27.22 | 10.36 |  |  | 10 | 11 | 23 | 40.98 | 9.31 | 7.46 |  |
| 0 | 16 | 22 | 0 | 22.66 | 0.87 |  |  | 1 | 12 | 23 | 332.22 | 8.83 | 17.5 |  |
| 2 | 16 | 22 | 147.55 | 23.33 | 12.81 |  |  | 3 | 12 | 23 | 129.19 | 6.5 | 11.79 |  |
| 4 | 16 | 22 | 131.15 | 17.69 | 11.74 |  |  | 5 | 12 | 23 | 198.45 | 6.83 | 14.79 |  |
| 6 | 16 | 22 | 65.31 | 16.89 | 8.64 |  |  | 7 | 12 | 23 | 58.03 | 8.43 | 8.58 |  |
| 8 | 16 | 22 | 137.71 | 17.36 | 13.83 |  |  | 9 | 12 | 23 | 110.82 | 9.42 | 10.35 |  |
| 10 | 16 | 22 | 97.68 | 19.92 | 13.18 |  |  | 11 | 12 | 23 | 144.16 | 14.15 | 13.89 |  |
| 1 | 17 | 22 | 205.84 | 34.3 | 16.01 |  |  | 0 | 13 | 23 | 194.85 | 7.59 | 13.75 |  |
| 3 | 17 | 22 | 103.54 | 30.8 | 9.07 |  |  | 2 | 13 | 23 | 70.9 | 6.7 | 8.56 |  |
| 5 | 17 | 22 | 0.25 | 40.96 | 9.25 |  |  | 4 | 13 | 23 | 109.82 | 7.36 | 10.47 |  |

| h | k | l | Fcal^2 | Fobs^2 | (Fobs^2) | |  | h | k | l | Fcal^2 | Fobs^2 | (Fobs^2) | |
| --- | --- | --- | --- | --- | --- | --- | --- | --- | --- | --- | --- | --- | --- | --- |
|  |  |  |  |  |  |  |  |  |  |  |  |  |  |  |
| 6 | 13 | 23 | 253.06 | 10.99 | 15.86 |  |  | 7 | 9 | 24 | 190.09 | 7.24 | 14.25 |  |
| 8 | 13 | 23 | 211.51 | 12.72 | 15.82 |  |  | 9 | 9 | 24 | 81.74 | 12.71 | 10.01 |  |
| 10 | 13 | 23 | 69.24 | 14.76 | 10.12 |  |  | 0 | 10 | 24 | 288.56 | 9.01 | 16.76 |  |
| 12 | 13 | 23 | 0 | 0.19 | 7.28 |  |  | 2 | 10 | 24 | 176.97 | 6.57 | 13.06 |  |
| 1 | 14 | 23 | 227.46 | 10.11 | 15.09 |  |  | 4 | 10 | 24 | 97.21 | 6.23 | 9.84 |  |
| 3 | 14 | 23 | 256.03 | 13.44 | 14.98 |  |  | 6 | 10 | 24 | 188.64 | 15.84 | 14.07 |  |
| 5 | 14 | 23 | 39.6 | 12.96 | 6.81 |  |  | 8 | 10 | 24 | 137.76 | 9.79 | 11.93 |  |
| 7 | 14 | 23 | 103.57 | 15.75 | 10.83 |  |  | 10 | 10 | 24 | 95.47 | 13.65 | 10.82 |  |
| 9 | 14 | 23 | 139.21 | 14.59 | 13.39 |  |  | 1 | 11 | 24 | 196.65 | 6.84 | 14.46 |  |
| 11 | 14 | 23 | 8.45 | 25.59 | 5.73 |  |  | 3 | 11 | 24 | 106.97 | 6.3 | 10.81 |  |
| 0 | 15 | 23 | 22.82 | 22.28 | 4.32 |  |  | 5 | 11 | 24 | 10.29 | 7.37 | 3.62 |  |
| 2 | 15 | 23 | 37.9 | 19.95 | 7.97 |  |  | 7 | 11 | 24 | 169.93 | 9.99 | 13.82 |  |
| 4 | 15 | 23 | 100.75 | 18.23 | 10.28 |  |  | 9 | 11 | 24 | 184.73 | 11.75 | 14.51 |  |
| 6 | 15 | 23 | 106.98 | 16.83 | 12.31 |  |  | 11 | 11 | 24 | 40.85 | 45.13 | 5.54 |  |
| 8 | 15 | 23 | 167.3 | 45.53 | 15.19 |  |  | 0 | 12 | 24 | 1571.08 | 12.16 | 37.94 |  |
| 10 | 15 | 23 | 88.56 | 25.61 | 13.36 |  |  | 2 | 12 | 24 | 81.39 | 7.98 | 9.36 |  |
| 1 | 16 | 23 | 118.17 | 59.18 | 11.84 |  |  | 4 | 12 | 24 | 608.5 | 12.42 | 25.14 |  |
| 3 | 16 | 23 | 0.46 | 60.79 | 11.79 |  |  | 6 | 12 | 24 | 20.85 | 11.95 | 5.36 |  |
| 7 | 16 | 23 | 0.25 | 40.49 | 9.16 |  |  | 8 | 12 | 24 | 606.14 | 20.04 | 26.46 |  |
| 6 | 17 | 23 | 0 | 0.19 | 8.96 |  |  | 10 | 12 | 24 | 116.73 | 21.03 | 12.77 |  |
| 0 | 0 | 24 | 2906.19 | 76.12 | 51.41 |  |  | 1 | 13 | 24 | 102.54 | 14.32 | 10.6 |  |
| 1 | 1 | 24 | 276.77 | 9.68 | 16.53 |  |  | 3 | 13 | 24 | 92.39 | 15.08 | 9.2 |  |
| 0 | 2 | 24 | 413.08 | 10.63 | 19.48 |  |  | 5 | 13 | 24 | 20.34 | 16.2 | 1.97 |  |
| 2 | 2 | 24 | 466.8 | 9.3 | 21.07 |  |  | 7 | 13 | 24 | 109.04 | 21.81 | 9.99 |  |
| 1 | 3 | 24 | 253.75 | 5.9 | 15.53 |  |  | 9 | 13 | 24 | 132.25 | 23.48 | 12.22 |  |
| 3 | 3 | 24 | 167.24 | 8.35 | 12.31 |  |  | 0 | 14 | 24 | 73.11 | 19.59 | 9.46 |  |
| 0 | 4 | 24 | 2711.57 | 17.23 | 49.22 |  |  | 2 | 14 | 24 | 57.14 | 20.07 | 8.55 |  |
| 2 | 4 | 24 | 114.51 | 8.82 | 10.61 |  |  | 4 | 14 | 24 | 11.87 | 18.03 | 4.91 |  |
| 4 | 4 | 24 | 1630 | 19.05 | 39.07 |  |  | 6 | 14 | 24 | 91.89 | 19.97 | 11.37 |  |
| 1 | 5 | 24 | 842.33 | 8.98 | 27.89 |  |  | 8 | 14 | 24 | 182.31 | 16.96 | 14.65 |  |
| 3 | 5 | 24 | 103.71 | 5.97 | 9.99 |  |  | 7 | 15 | 24 | 0 | 0.19 | 11.66 |  |
| 5 | 5 | 24 | 2.07 | 7.96 | 1.8 |  |  | 0 | 1 | 25 | 274.93 | 7.02 | 16.07 |  |
| 0 | 6 | 24 | 334.42 | 6.37 | 17.79 |  |  | 1 | 2 | 25 | 321.52 | 6.44 | 17.46 |  |
| 2 | 6 | 24 | 176.31 | 5.83 | 13.54 |  |  | 0 | 3 | 25 | 329.68 | 8.54 | 16.85 |  |
| 4 | 6 | 24 | 270.89 | 10.15 | 15.95 |  |  | 2 | 3 | 25 | 280.64 | 6.84 | 16.1 |  |
| 6 | 6 | 24 | 153.81 | 9.48 | 11.48 |  |  | 1 | 4 | 25 | 121.57 | 5.97 | 10.93 |  |
| 1 | 7 | 24 | 419.03 | 7.88 | 19.56 |  |  | 3 | 4 | 25 | 189.05 | 11.19 | 13.9 |  |
| 3 | 7 | 24 | 287.85 | 6.36 | 16.26 |  |  | 0 | 5 | 25 | 101.11 | 5.77 | 9.3 |  |
| 5 | 7 | 24 | 463.59 | 7.58 | 20.4 |  |  | 2 | 5 | 25 | 242.19 | 6.57 | 15.71 |  |
| 7 | 7 | 24 | 260.83 | 11.95 | 14.93 |  |  | 4 | 5 | 25 | 248.15 | 7.24 | 15.01 |  |
| 0 | 8 | 24 | 1959.26 | 13.82 | 42.05 |  |  | 1 | 6 | 25 | 245.08 | 8.44 | 14.89 |  |
| 2 | 8 | 24 | 360.17 | 6.71 | 18.3 |  |  | 3 | 6 | 25 | 65.65 | 5.9 | 7.74 |  |
| 4 | 8 | 24 | 1692.2 | 12.79 | 38.35 |  |  | 5 | 6 | 25 | 88.95 | 8.44 | 9.3 |  |
| 6 | 8 | 24 | 317.88 | 15.85 | 17.16 |  |  | 0 | 7 | 25 | 72.45 | 7.87 | 8.94 |  |
| 8 | 8 | 24 | 2133.64 | 22.51 | 44.81 |  |  | 2 | 7 | 25 | 219.1 | 6.77 | 14.68 |  |
| 1 | 9 | 24 | 115.82 | 7.11 | 10.42 |  |  | 4 | 7 | 25 | 155.06 | 6.57 | 11.6 |  |
| 3 | 9 | 24 | 209 | 8.16 | 14.31 |  |  | 6 | 7 | 25 | 236.42 | 12.71 | 14.66 |  |
| 5 | 9 | 24 | 434.4 | 7.99 | 19.74 |  |  | 1 | 8 | 25 | 173.24 | 6.5 | 13.05 |  |

| h | k | l | Fcal^2 | Fobs^2 | (Fobs^2) | |  | h | k | l | Fcal^2 | Fobs^2 | (Fobs^2) | |
| --- | --- | --- | --- | --- | --- | --- | --- | --- | --- | --- | --- | --- | --- | --- |
|  |  |  |  |  |  |  |  |  |  |  |  |  |  |  |
| 3 | 8 | 25 | 292.1 | 7.11 | 16.42 |  |  | 0 | 8 | 26 | 207.65 | 7.1 | 15.31 |  |
| 5 | 8 | 25 | 187.09 | 7.17 | 13.88 |  |  | 2 | 8 | 26 | 62.89 | 7.11 | 8.46 |  |
| 7 | 8 | 25 | 288.79 | 10.33 | 16.87 |  |  | 4 | 8 | 26 | 51.02 | 8.51 | 7.07 |  |
| 0 | 9 | 25 | 245.97 | 7.24 | 15.75 |  |  | 6 | 8 | 26 | 103.45 | 10.52 | 10.73 |  |
| 2 | 9 | 25 | 194.87 | 7.03 | 13.78 |  |  | 8 | 8 | 26 | 190.12 | 17.64 | 15.25 |  |
| 4 | 9 | 25 | 26.51 | 6.57 | 4.56 |  |  | 1 | 9 | 26 | 57.28 | 9.99 | 8.88 |  |
| 6 | 9 | 25 | 187.06 | 10.34 | 14.22 |  |  | 3 | 9 | 26 | 103.24 | 11.6 | 11.39 |  |
| 8 | 9 | 25 | 133.28 | 9.32 | 11.82 |  |  | 5 | 9 | 26 | 94.64 | 11.06 | 10.8 |  |
| 1 | 10 | 25 | 226.95 | 7.09 | 14.81 |  |  | 7 | 9 | 26 | 85.51 | 13.6 | 10.85 |  |
| 3 | 10 | 25 | 141.25 | 7.84 | 12.09 |  |  | 9 | 9 | 26 | 79.41 | 47.22 | 7.81 |  |
| 5 | 10 | 25 | 45.57 | 9.1 | 7.34 |  |  | 0 | 10 | 26 | 110.02 | 16.46 | 11.34 |  |
| 7 | 10 | 25 | 139.6 | 13.09 | 12.33 |  |  | 2 | 10 | 26 | 925.64 | 17.64 | 31.34 |  |
| 9 | 10 | 25 | 107.57 | 25.13 | 9.96 |  |  | 4 | 10 | 26 | 86.04 | 13.65 | 9.58 |  |
| 0 | 11 | 25 | 412.9 | 10.97 | 19.8 |  |  | 6 | 10 | 26 | 533.07 | 18.99 | 24.32 |  |
| 2 | 11 | 25 | 50.2 | 11.12 | 7.11 |  |  | 8 | 10 | 26 | 51.7 | 28.35 | 9.15 |  |
| 4 | 11 | 25 | 136.22 | 13.41 | 12.05 |  |  | 1 | 11 | 26 | 230.9 | 29.63 | 15.79 |  |
| 6 | 11 | 25 | 120.1 | 13.88 | 11.7 |  |  | 3 | 11 | 26 | 65.78 | 42.2 | 9.79 |  |
| 8 | 11 | 25 | 20.21 | 15.87 | 5.45 |  |  | 5 | 11 | 26 | 70.51 | 25.22 | 8.66 |  |
| 10 | 11 | 25 | 8.49 | 33.33 | 6.27 |  |  | 7 | 11 | 26 | 12.86 | 34.22 | 4.19 |  |
| 1 | 12 | 25 | 30.49 | 18.9 | 7 |  |  | 6 | 12 | 26 | 78.58 | 30.41 | 8.94 |  |
| 3 | 12 | 25 | 4.25 | 27.21 | 4.66 |  |  | 0 | 1 | 27 | 163.54 | 8.16 | 12.51 |  |
| 5 | 12 | 25 | 96.71 | 15.63 | 9.95 |  |  | 1 | 2 | 27 | 162.92 | 7.78 | 13.23 |  |
| 7 | 12 | 25 | 36.81 | 20.89 | 4.52 |  |  | 0 | 3 | 27 | 1.31 | 6.17 | 2.67 |  |
| 9 | 12 | 25 | 51.5 | 38.78 | 8.14 |  |  | 2 | 3 | 27 | 153.19 | 7.3 | 12.79 |  |
| 2 | 13 | 25 | 75.58 | 35.86 | 8.59 |  |  | 1 | 4 | 27 | 55 | 6.64 | 7.75 |  |
| 4 | 13 | 25 | 63.18 | 38.9 | 9.67 |  |  | 3 | 4 | 27 | 132.37 | 7.38 | 11.62 |  |
| 6 | 13 | 25 | 25.63 | 34.89 | 7.23 |  |  | 0 | 5 | 27 | 202.27 | 7.78 | 15.14 |  |
| 8 | 13 | 25 | 85.32 | 51.59 | 11.04 |  |  | 2 | 5 | 27 | 32.08 | 7.16 | 5.8 |  |
| 0 | 0 | 26 | 114.25 | 12.33 | 9.7 |  |  | 4 | 5 | 27 | 107.92 | 8.31 | 10.57 |  |
| 1 | 1 | 26 | 385.15 | 10.82 | 19.24 |  |  | 1 | 6 | 27 | 160.43 | 8.3 | 13.16 |  |
| 0 | 2 | 26 | 135.46 | 6.64 | 12.02 |  |  | 3 | 6 | 27 | 140.73 | 8.71 | 12.52 |  |
| 2 | 2 | 26 | 1725.74 | 20.57 | 39.82 |  |  | 5 | 6 | 27 | 221.05 | 11.19 | 15.29 |  |
| 1 | 3 | 26 | 119.73 | 8.06 | 10.85 |  |  | 0 | 7 | 27 | 68.19 | 12.57 | 8.91 |  |
| 3 | 3 | 26 | 180.79 | 10.43 | 13.07 |  |  | 2 | 7 | 27 | 39 | 9.31 | 7.41 |  |
| 0 | 4 | 26 | 78.44 | 5.7 | 8.93 |  |  | 4 | 7 | 27 | 133.94 | 12.14 | 13 |  |
| 2 | 4 | 26 | 198.61 | 7.03 | 13.69 |  |  | 6 | 7 | 27 | 65.86 | 11.66 | 8.04 |  |
| 4 | 4 | 26 | 175.58 | 10.62 | 13.32 |  |  | 1 | 8 | 27 | 92.85 | 15.82 | 11.34 |  |
| 1 | 5 | 26 | 159.91 | 6.3 | 12.57 |  |  | 3 | 8 | 27 | 44.4 | 17.57 | 9.76 |  |
| 3 | 5 | 26 | 359.68 | 7.57 | 18.15 |  |  | 5 | 8 | 27 | 63.89 | 27.4 | 8.78 |  |
| 5 | 5 | 26 | 165.85 | 10.62 | 13.05 |  |  | 7 | 8 | 27 | 48.92 | 24.62 | 9.29 |  |
| 0 | 6 | 26 | 140.94 | 6.64 | 11.49 |  |  | 0 | 9 | 27 | 21.01 | 49.3 | 5.25 |  |
| 2 | 6 | 26 | 1114.06 | 10.08 | 32.7 |  |  | 2 | 9 | 27 | 102.06 | 25.27 | 11.45 |  |
| 4 | 6 | 26 | 202.45 | 7.59 | 14.28 |  |  | 4 | 9 | 27 | 55.51 | 22.57 | 9.33 |  |
| 6 | 6 | 26 | 1474.74 | 18.85 | 37.39 |  |  | 6 | 9 | 27 | 30.66 | 27.43 | 5.47 |  |
| 1 | 7 | 26 | 28.93 | 6.22 | 6.08 |  |  | 8 | 9 | 27 | 0 | 38.21 | 7.93 |  |
| 3 | 7 | 26 | 165.48 | 7.36 | 12.83 |  |  | 3 | 10 | 27 | 68.41 | 29.77 | 9.46 |  |
| 5 | 7 | 26 | 153.77 | 8.44 | 12.58 |  |  | 5 | 10 | 27 | 0 | 15.74 | 5.57 |  |
| 7 | 7 | 26 | 192.49 | 16.32 | 14.01 |  |  | 7 | 10 | 27 | 0 | 0.19 | 9.49 |  |

| h | k | l | Fcal^2 | Fobs^2 | (Fobs^2) | |  | h | k | l | Fcal^2 | Fobs^2 | (Fobs^2) | |
| --- | --- | --- | --- | --- | --- | --- | --- | --- | --- | --- | --- | --- | --- | --- |
|  |  |  |  |  |  |  |  |  |  |  |  |  |  |  |
| 0 | 0 | 28 | 842.18 | 15.58 | 28.46 |  |  |  |  |  |  |  |  |  |
| 1 | 1 | 28 | 29.52 | 11.38 | 8.03 |  |  |  |  |  |  |  |  |  |
| 0 | 2 | 28 | 37.17 | 7.71 | 7.28 |  |  |  |  |  |  |  |  |  |
| 2 | 2 | 28 | 53.42 | 13.46 | 6.82 |  |  |  |  |  |  |  |  |  |
| 1 | 3 | 28 | 277.22 | 10.15 | 17.94 |  |  |  |  |  |  |  |  |  |
| 3 | 3 | 28 | 162.58 | 15.18 | 14.33 |  |  |  |  |  |  |  |  |  |
| 0 | 4 | 28 | 566.71 | 9.87 | 25 |  |  |  |  |  |  |  |  |  |
| 2 | 4 | 28 | 188.62 | 12.14 | 15.51 |  |  |  |  |  |  |  |  |  |
| 4 | 4 | 28 | 829.54 | 21.67 | 30.24 |  |  |  |  |  |  |  |  |  |
| 1 | 5 | 28 | 19.48 | 13.71 | 5.26 |  |  |  |  |  |  |  |  |  |
| 3 | 5 | 28 | 36.9 | 25.51 | 8.3 |  |  |  |  |  |  |  |  |  |
| 5 | 5 | 28 | 190.67 | 33.77 | 15.07 |  |  |  |  |  |  |  |  |  |
| 0 | 6 | 28 | 36.29 | 19.44 | 7.27 |  |  |  |  |  |  |  |  |  |
| 2 | 6 | 28 | 75.26 | 30.52 | 8.11 |  |  |  |  |  |  |  |  |  |
| 4 | 6 | 28 | 22.35 | 19.23 | 5.79 |  |  |  |  |  |  |  |  |  |
| 1 | 7 | 28 | 22.24 | 35.27 | 7.14 |  |  |  |  |  |  |  |  |  |
| 3 | 7 | 28 | 54.01 | 22.51 | 8.94 |  |  |  |  |  |  |  |  |  |
| 5 | 7 | 28 | 19.57 | 33.23 | 7.29 |  |  |  |  |  |  |  |  |  |
| 2 | 8 | 28 | 16.49 | 70.73 | 7.2 |  |  |  |  |  |  |  |  |  |
| 4 | 8 | 28 | 447.2 | 41.35 | 25.91 |  |  |  |  |  |  |  |  |  |
| 0 | 1 | 29 | 81.66 | 13.61 | 10.46 |  |  |  |  |  |  |  |  |  |
| 1 | 2 | 29 | 36.06 | 13.02 | 7.65 |  |  |  |  |  |  |  |  |  |
| 0 | 3 | 29 | 9.52 | 14.99 | 4.74 |  |  |  |  |  |  |  |  |  |
| 2 | 3 | 29 | 83.24 | 26.05 | 10.42 |  |  |  |  |  |  |  |  |  |
| 1 | 4 | 29 | 90.51 | 15.81 | 12.13 |  |  |  |  |  |  |  |  |  |
| 3 | 4 | 29 | 108.8 | 39.86 | 11.25 |  |  |  |  |  |  |  |  |  |
| 2 | 5 | 29 | 0.13 | 19.72 | 5.39 |  |  |  |  |  |  |  |  |  |
|  |  |  |  |  |  |  |  |  |  |  |  |  |  |  |
|  |  |  |  |  |  |  |  |  |  |  |  |  |  |  |
|  |  |  |  |  |  |  |  |  |  |  |  |  |  |  |
|  |  |  |  |  |  |  |  |  |  |  |  |  |  |  |
|  |  |  |  |  |  |  |  |  |  |  |  |  |  |  |
|  |  |  |  |  |  |  |  |  |  |  |  |  |  |  |
|  |  |  |  |  |  |  |  |  |  |  |  |  |  |  |
|  |  |  |  |  |  |  |  |  |  |  |  |  |  |  |
|  |  |  |  |  |  |  |  |  |  |  |  |  |  |  |
|  |  |  |  |  |  |  |  |  |  |  |  |  |  |  |
|  |  |  |  |  |  |  |  |  |  |  |  |  |  |  |
|  |  |  |  |  |  |  |  |  |  |  |  |  |  |  |
|  |  |  |  |  |  |  |  |  |  |  |  |  |  |  |
|  |  |  |  |  |  |  |  |  |  |  |  |  |  |  |
|  |  |  |  |  |  |  |  |  |  |  |  |  |  |  |
|  |  |  |  |  |  |  |  |  |  |  |  |  |  |  |
|  |  |  |  |  |  |  |  |  |  |  |  |  |  |  |
|  |  |  |  |  |  |  |  |  |  |  |  |  |  |  |
|  |  |  |  |  |  |  |  |  |  |  |  |  |  |  |
|  |  |  |  |  |  |  |  |  |  |  |  |  |  |  |
|  |  |  |  |  |  |  |  |  |  |  |  |  |  |  |

Crystal 6

| h | k | l | Fcal^2 | Fobs^2 | σ(Fobs^2) | |  | h | k | l | Fcal^2 | Fobs^2 | σ(Fobs^2) | |
| --- | --- | --- | --- | --- | --- | --- | --- | --- | --- | --- | --- | --- | --- | --- |
|  |  |  |  |  |  |  |  |  |  |  |  |  |  |  |
| 0 | 2 | 2 | 18682.61 | 149.29 | 138.23 |  |  | 4 | 5 | 7 | 7815.14 | 39.73 | 93.18 |  |
| 0 | 1 | 3 | 14417.03 | 82.9 | 127.7 |  |  | 1 | 6 | 7 | 5228.11 | 27.17 | 75.5 |  |
| 1 | 2 | 3 | 2422.66 | 23.29 | 57.04 |  |  | 3 | 6 | 7 | 8570.67 | 41.66 | 95.93 |  |
| 0 | 3 | 3 | 1619.6 | 14.14 | 42.1 |  |  | 5 | 6 | 7 | 5514.92 | 29.13 | 77.39 |  |
| 2 | 3 | 3 | 35710.35 | 274.13 | 184.77 |  |  | 0 | 7 | 7 | 9063.21 | 73.09 | 98.31 |  |
| 0 | 0 | 4 | 378.78 | 6.96 | 25.49 |  |  | 2 | 7 | 7 | 5143.03 | 42.37 | 76.08 |  |
| 1 | 1 | 4 | 9989.31 | 74.64 | 106.81 |  |  | 4 | 7 | 7 | 6070.78 | 40.53 | 76.08 |  |
| 0 | 2 | 4 | 2702.76 | 13.94 | 57.19 |  |  | 6 | 7 | 7 | 8210.18 | 63.51 | 91.04 |  |
| 2 | 2 | 4 | 18216.89 | 121.33 | 141.78 |  |  | 0 | 0 | 8 | 92967.88 | 921.89 | 275.71 |  |
| 1 | 3 | 4 | 31560.48 | 191.87 | 173.92 |  |  | 1 | 1 | 8 | 1720.29 | 14.02 | 49.26 |  |
| 3 | 3 | 4 | 40311.42 | 325.41 | 192 |  |  | 0 | 2 | 8 | 1142.96 | 7.16 | 37.51 |  |
| 2 | 4 | 4 | 30955.29 | 226.35 | 168.68 |  |  | 2 | 2 | 8 | 11463.53 | 79.83 | 107.57 |  |
| 0 | 1 | 5 | 1732.54 | 10.36 | 48.44 |  |  | 1 | 3 | 8 | 6570.53 | 32.89 | 84.28 |  |
| 1 | 2 | 5 | 3053.27 | 17.23 | 62.32 |  |  | 3 | 3 | 8 | 3367.1 | 22.67 | 61.24 |  |
| 0 | 3 | 5 | 1338.41 | 7.45 | 44.23 |  |  | 0 | 4 | 8 | 54626.62 | 272.23 | 221.82 |  |
| 2 | 3 | 5 | 17907.36 | 142.39 | 136.91 |  |  | 2 | 4 | 8 | 9832.23 | 46.36 | 102.94 |  |
| 1 | 4 | 5 | 8743.61 | 42.71 | 100.18 |  |  | 4 | 4 | 8 | 38816.81 | 249.12 | 193.6 |  |
| 3 | 4 | 5 | 5354.42 | 28.79 | 79.7 |  |  | 1 | 5 | 8 | 11615.02 | 57.52 | 109.74 |  |
| 0 | 5 | 5 | 15069.33 | 122.3 | 127.78 |  |  | 3 | 5 | 8 | 3434.86 | 17.11 | 64.22 |  |
| 2 | 5 | 5 | 670.9 | 6.35 | 31.35 |  |  | 5 | 5 | 8 | 2218.48 | 15.58 | 46.78 |  |
| 4 | 5 | 5 | 16640.41 | 133.38 | 131.52 |  |  | 0 | 6 | 8 | 12694.32 | 64.62 | 114.14 |  |
| 0 | 0 | 6 | 1594.04 | 17.84 | 44.54 |  |  | 2 | 6 | 8 | 2171.95 | 12.27 | 50.24 |  |
| 1 | 1 | 6 | 5591.02 | 38.79 | 82.16 |  |  | 4 | 6 | 8 | 1896.05 | 10.48 | 45.03 |  |
| 0 | 2 | 6 | 6477.5 | 32.34 | 88.76 |  |  | 6 | 6 | 8 | 4191.34 | 30.1 | 67.17 |  |
| 2 | 2 | 6 | 75105.12 | 600.66 | 250.41 |  |  | 1 | 7 | 8 | 5782.39 | 31.52 | 78.24 |  |
| 1 | 3 | 6 | 3575.89 | 18.82 | 68.99 |  |  | 3 | 7 | 8 | 8841.43 | 46.75 | 95.67 |  |
| 3 | 3 | 6 | 7974.19 | 60.06 | 94.3 |  |  | 5 | 7 | 8 | 7494.34 | 74.14 | 86.55 |  |
| 0 | 4 | 6 | 4443.77 | 22.88 | 70.54 |  |  | 7 | 7 | 8 | 6554.19 | 51.83 | 81.03 |  |
| 2 | 4 | 6 | 7446.17 | 38.17 | 89.5 |  |  | 0 | 8 | 8 | 60842.58 | 448.79 | 226.79 |  |
| 4 | 4 | 6 | 6685.49 | 47.55 | 88.68 |  |  | 2 | 8 | 8 | 8507.84 | 68.49 | 90.69 |  |
| 1 | 5 | 6 | 12197.87 | 68.56 | 114.25 |  |  | 4 | 8 | 8 | 45453.48 | 322.71 | 201.8 |  |
| 3 | 5 | 6 | 11990.66 | 65.9 | 111.83 |  |  | 6 | 8 | 8 | 7684.32 | 58.79 | 88.77 |  |
| 5 | 5 | 6 | 16548.03 | 129.2 | 129.81 |  |  | 8 | 8 | 8 | 25644.5 | 294.71 | 153.46 |  |
| 0 | 6 | 6 | 9918.72 | 80.13 | 97.1 |  |  | 0 | 1 | 9 | 12618.01 | 61.2 | 114.22 |  |
| 2 | 6 | 6 | 59057.54 | 446.35 | 230.1 |  |  | 1 | 2 | 9 | 9645.36 | 48.39 | 101.07 |  |
| 4 | 6 | 6 | 13905.6 | 98.44 | 118.23 |  |  | 0 | 3 | 9 | 3972.6 | 20.35 | 67.37 |  |
| 6 | 6 | 6 | 108050.16 | 1511.48 | 287.48 |  |  | 2 | 3 | 9 | 2750.32 | 15.51 | 56.18 |  |
| 0 | 1 | 7 | 7240.05 | 36.4 | 91.09 |  |  | 1 | 4 | 9 | 2674.95 | 13.2 | 57.06 |  |
| 1 | 2 | 7 | 8206.59 | 41.04 | 97.55 |  |  | 3 | 4 | 9 | 7776.51 | 38.81 | 91.12 |  |
| 0 | 3 | 7 | 2580.86 | 13.75 | 58.87 |  |  | 0 | 5 | 9 | 2358.6 | 13 | 49.54 |  |
| 2 | 3 | 7 | 5578.57 | 28.51 | 77.18 |  |  | 2 | 5 | 9 | 6330.17 | 30.92 | 84 |  |
| 1 | 4 | 7 | 7099.63 | 33.25 | 89.05 |  |  | 4 | 5 | 9 | 3637.66 | 21.9 | 63.37 |  |
| 3 | 4 | 7 | 4319.98 | 22.96 | 70.08 |  |  | 1 | 6 | 9 | 4199.65 | 23.41 | 67.81 |  |
| 0 | 5 | 7 | 3910.51 | 20.3 | 67.82 |  |  | 3 | 6 | 9 | 3467.88 | 19.55 | 62.29 |  |
| 2 | 5 | 7 | 2606.61 | 35.91 | 52.29 |  |  | 5 | 6 | 9 | 1703.99 | 10.01 | 43.85 |  |

| h | k | l | Fcal^2 | Fobs^2 | (Fobs^2) | |  | h | k | l | Fcal^2 | Fobs^2 | (Fobs^2) | |
| --- | --- | --- | --- | --- | --- | --- | --- | --- | --- | --- | --- | --- | --- | --- |
|  |  |  |  |  |  |  |  |  |  |  |  |  |  |  |
| 0 | 7 | 9 | 7516.03 | 40.49 | 87.01 |  |  | 10 | 10 | 10 | 14329.13 | 178.49 | 112.84 |  |
| 2 | 7 | 9 | 8256.81 | 41.02 | 93.26 |  |  | 0 | 1 | 11 | 7430.92 | 36.74 | 87.97 |  |
| 4 | 7 | 9 | 1591.07 | 8.92 | 41.52 |  |  | 1 | 2 | 11 | 5870.74 | 31.09 | 77.4 |  |
| 6 | 7 | 9 | 3382.15 | 18.71 | 58.83 |  |  | 0 | 3 | 11 | 6938.52 | 34.88 | 85.7 |  |
| 1 | 8 | 9 | 4020.4 | 25.94 | 64.4 |  |  | 2 | 3 | 11 | 2252.87 | 12.8 | 51.33 |  |
| 3 | 8 | 9 | 3955.55 | 22.14 | 64.71 |  |  | 1 | 4 | 11 | 558.5 | 4.93 | 26.21 |  |
| 5 | 8 | 9 | 5435.88 | 28.76 | 76.13 |  |  | 3 | 4 | 11 | 6384.76 | 32.99 | 81.75 |  |
| 7 | 8 | 9 | 2506.08 | 14.92 | 51.78 |  |  | 0 | 5 | 11 | 4152.08 | 22.26 | 66.17 |  |
| 0 | 9 | 9 | 5823.9 | 48.45 | 79.86 |  |  | 2 | 5 | 11 | 6007.5 | 35.04 | 80.2 |  |
| 2 | 9 | 9 | 4934.14 | 38.3 | 71.85 |  |  | 4 | 5 | 11 | 4122.8 | 21.34 | 64.76 |  |
| 4 | 9 | 9 | 1312.72 | 12.5 | 35.01 |  |  | 1 | 6 | 11 | 4268.07 | 22.64 | 69.03 |  |
| 6 | 9 | 9 | 4647.47 | 33.99 | 69.51 |  |  | 3 | 6 | 11 | 5010.34 | 26.38 | 70.66 |  |
| 8 | 9 | 9 | 1719.44 | 16.26 | 41.61 |  |  | 5 | 6 | 11 | 1869.96 | 10.98 | 43.32 |  |
| 0 | 0 | 10 | 49118.31 | 447.97 | 208.29 |  |  | 0 | 7 | 11 | 3904.74 | 21.69 | 64.52 |  |
| 1 | 1 | 10 | 1105.35 | 8.95 | 33.36 |  |  | 2 | 7 | 11 | 2850.17 | 16.44 | 53.55 |  |
| 0 | 2 | 10 | 1438.16 | 9.13 | 37.82 |  |  | 4 | 7 | 11 | 6927.87 | 48.48 | 83.94 |  |
| 2 | 2 | 10 | 47237.2 | 309.11 | 206.09 |  |  | 6 | 7 | 11 | 498.34 | 4.27 | 23.76 |  |
| 1 | 3 | 10 | 5011.81 | 25.18 | 75.72 |  |  | 1 | 8 | 11 | 4236.83 | 37.55 | 65.14 |  |
| 3 | 3 | 10 | 14955.47 | 98.26 | 120.18 |  |  | 3 | 8 | 11 | 122.27 | 3.08 | 11.14 |  |
| 0 | 4 | 10 | 221.38 | 2.93 | 15.53 |  |  | 5 | 8 | 11 | 129.38 | 6.77 | 12.48 |  |
| 2 | 4 | 10 | 8496.49 | 42.31 | 93.18 |  |  | 7 | 8 | 11 | 567.56 | 5.76 | 24.54 |  |
| 4 | 4 | 10 | 8456.12 | 59.42 | 93.89 |  |  | 0 | 9 | 11 | 2084.98 | 13.59 | 49.14 |  |
| 1 | 5 | 10 | 5073.71 | 26.79 | 74.73 |  |  | 2 | 9 | 11 | 1791.94 | 10.83 | 43.01 |  |
| 3 | 5 | 10 | 3476.84 | 18.84 | 60.21 |  |  | 4 | 9 | 11 | 2486.15 | 15.51 | 48.68 |  |
| 5 | 5 | 10 | 1487.29 | 13.47 | 39.5 |  |  | 6 | 9 | 11 | 1769.81 | 11.91 | 44.62 |  |
| 0 | 6 | 10 | 4195.38 | 21.87 | 69.11 |  |  | 8 | 9 | 11 | 3135.69 | 18.48 | 56.5 |  |
| 2 | 6 | 10 | 48892.86 | 233.62 | 208.99 |  |  | 1 | 10 | 11 | 686.37 | 6.24 | 27.35 |  |
| 4 | 6 | 10 | 2267.97 | 14.04 | 49.13 |  |  | 3 | 10 | 11 | 1694.73 | 10.75 | 40.39 |  |
| 6 | 6 | 10 | 16411.08 | 109.37 | 129.05 |  |  | 5 | 10 | 11 | 1382.04 | 9.62 | 36.3 |  |
| 1 | 7 | 10 | 5642.3 | 31.43 | 75.52 |  |  | 7 | 10 | 11 | 2084.41 | 14.34 | 45.49 |  |
| 3 | 7 | 10 | 2255.94 | 13.17 | 51.58 |  |  | 9 | 10 | 11 | 1781.71 | 12.47 | 41.71 |  |
| 5 | 7 | 10 | 3643.22 | 21.62 | 64.33 |  |  | 0 | 11 | 11 | 6.8 | 4.82 | 2.37 |  |
| 7 | 7 | 10 | 2015.48 | 17.42 | 45.22 |  |  | 2 | 11 | 11 | 2374.4 | 23.62 | 49.06 |  |
| 0 | 8 | 10 | 5028.78 | 77.95 | 74.14 |  |  | 4 | 11 | 11 | 253.42 | 6.12 | 15.81 |  |
| 2 | 8 | 10 | 5383.66 | 28.32 | 75.73 |  |  | 6 | 11 | 11 | 3923.04 | 33.6 | 63.41 |  |
| 4 | 8 | 10 | 1260.39 | 7.97 | 34.2 |  |  | 8 | 11 | 11 | 4198.7 | 35.26 | 63.16 |  |
| 6 | 8 | 10 | 3246.03 | 18.53 | 57.68 |  |  | 10 | 11 | 11 | 1013.92 | 11.15 | 29.99 |  |
| 8 | 8 | 10 | 2403.84 | 20.07 | 51.32 |  |  | 0 | 0 | 12 | 36877.45 | 339.22 | 183.39 |  |
| 1 | 9 | 10 | 3020.66 | 18.18 | 55.37 |  |  | 1 | 1 | 12 | 3525.78 | 27.72 | 61.76 |  |
| 3 | 9 | 10 | 2502.03 | 14.86 | 50.75 |  |  | 0 | 2 | 12 | 5692.04 | 29.52 | 78.9 |  |
| 5 | 9 | 10 | 3313.85 | 20.28 | 58.21 |  |  | 2 | 2 | 12 | 4200.5 | 33.11 | 64.44 |  |
| 7 | 9 | 10 | 1784.29 | 12.49 | 41.95 |  |  | 1 | 3 | 12 | 3309.39 | 17.8 | 60.46 |  |
| 9 | 9 | 10 | 1644.07 | 16.81 | 39.7 |  |  | 3 | 3 | 12 | 2325.15 | 17.26 | 48.38 |  |
| 0 | 10 | 10 | 1123.4 | 12.47 | 30.48 |  |  | 0 | 4 | 12 | 30825.49 | 142.42 | 172.76 |  |
| 2 | 10 | 10 | 18235.07 | 132.09 | 132.37 |  |  | 2 | 4 | 12 | 1781.58 | 11.05 | 41.91 |  |
| 4 | 10 | 10 | 3652.29 | 29.44 | 60.43 |  |  | 4 | 4 | 12 | 43325.04 | 284.67 | 193.79 |  |
| 6 | 10 | 10 | 22217.21 | 165.68 | 145.3 |  |  | 1 | 5 | 12 | 4886.07 | 24.68 | 71.97 |  |
| 8 | 10 | 10 | 1650.23 | 17.37 | 39.71 |  |  | 3 | 5 | 12 | 4368.42 | 23.43 | 66.36 |  |

| h | k | l | Fcal^2 | Fobs^2 | (Fobs^2) | |  | h | k | l | Fcal^2 | Fobs^2 | (Fobs^2) | |
| --- | --- | --- | --- | --- | --- | --- | --- | --- | --- | --- | --- | --- | --- | --- |
|  |  |  |  |  |  |  |  |  |  |  |  |  |  |  |
| 5 | 5 | 12 | 4579.3 | 33.61 | 67.55 |  |  | 3 | 6 | 13 | 1351.89 | 9.29 | 35.85 |  |
| 0 | 6 | 12 | 1072.68 | 7.11 | 31.72 |  |  | 5 | 6 | 13 | 296.06 | 4 | 16.31 |  |
| 2 | 6 | 12 | 5731.04 | 29.23 | 76.39 |  |  | 0 | 7 | 13 | 2661.68 | 15.6 | 51.51 |  |
| 4 | 6 | 12 | 7262.61 | 41.14 | 86.52 |  |  | 2 | 7 | 13 | 3695.74 | 21.9 | 61.54 |  |
| 6 | 6 | 12 | 7.78 | 3.33 | 6.05 |  |  | 4 | 7 | 13 | 1716.51 | 11.23 | 42.22 |  |
| 1 | 7 | 12 | 595.68 | 5.19 | 24.38 |  |  | 6 | 7 | 13 | 1431.58 | 11.56 | 39.33 |  |
| 3 | 7 | 12 | 2953.69 | 17.45 | 55.35 |  |  | 1 | 8 | 13 | 3005.55 | 35.22 | 56.56 |  |
| 5 | 7 | 12 | 2080.1 | 12.84 | 46.59 |  |  | 3 | 8 | 13 | 260.98 | 3.8 | 16.16 |  |
| 7 | 7 | 12 | 1774.22 | 14.56 | 41.9 |  |  | 5 | 8 | 13 | 181.87 | 6.58 | 12.46 |  |
| 0 | 8 | 12 | 18080.88 | 94.93 | 130.76 |  |  | 7 | 8 | 13 | 2149.28 | 14.5 | 45.5 |  |
| 2 | 8 | 12 | 1405.77 | 9.1 | 38.31 |  |  | 0 | 9 | 13 | 2638.6 | 16.58 | 50.76 |  |
| 4 | 8 | 12 | 12528.79 | 63.51 | 111.27 |  |  | 2 | 9 | 13 | 374.32 | 4.72 | 18.59 |  |
| 6 | 8 | 12 | 412.3 | 7.61 | 19.55 |  |  | 4 | 9 | 13 | 2124.83 | 13.5 | 46.83 |  |
| 8 | 8 | 12 | 14977.71 | 109.8 | 118.42 |  |  | 6 | 9 | 13 | 3103.89 | 20.26 | 56.09 |  |
| 1 | 9 | 12 | 893.66 | 15.25 | 30.14 |  |  | 8 | 9 | 13 | 1813.18 | 11.74 | 42.19 |  |
| 3 | 9 | 12 | 3235.61 | 17.98 | 59.05 |  |  | 1 | 10 | 13 | 1484.94 | 10.54 | 37.66 |  |
| 5 | 9 | 12 | 1864.68 | 12.37 | 44.53 |  |  | 3 | 10 | 13 | 2885.09 | 17.51 | 54.16 |  |
| 7 | 9 | 12 | 2092.13 | 14.9 | 46.35 |  |  | 5 | 10 | 13 | 2264.31 | 14.82 | 48.39 |  |
| 9 | 9 | 12 | 1633.55 | 16.98 | 38.74 |  |  | 7 | 10 | 13 | 694.37 | 6.7 | 27.43 |  |
| 0 | 10 | 12 | 765.12 | 6.77 | 26.8 |  |  | 9 | 10 | 13 | 624.24 | 5.97 | 23.43 |  |
| 2 | 10 | 12 | 496.97 | 5.65 | 23.2 |  |  | 0 | 11 | 13 | 12.15 | 3.47 | 2.91 |  |
| 4 | 10 | 12 | 2339.51 | 14.84 | 49.35 |  |  | 2 | 11 | 13 | 1325.5 | 10.74 | 36.55 |  |
| 6 | 10 | 12 | 2906.48 | 17.38 | 54.04 |  |  | 4 | 11 | 13 | 2893.83 | 17.84 | 54.88 |  |
| 8 | 10 | 12 | 2244.54 | 15.74 | 46.9 |  |  | 6 | 11 | 13 | 1749.37 | 16.79 | 40.48 |  |
| 10 | 10 | 12 | 2064.97 | 18.86 | 45.46 |  |  | 8 | 11 | 13 | 405.36 | 5.7 | 19.43 |  |
| 1 | 11 | 12 | 3012.22 | 19.18 | 54.6 |  |  | 10 | 11 | 13 | 1136.84 | 9.12 | 33.76 |  |
| 3 | 11 | 12 | 3738.74 | 22.51 | 60.22 |  |  | 1 | 12 | 13 | 1434.07 | 11.28 | 37.56 |  |
| 5 | 11 | 12 | 2319.88 | 14.96 | 48.34 |  |  | 3 | 12 | 13 | 1396.57 | 12.95 | 36.81 |  |
| 7 | 11 | 12 | 1174.43 | 10.06 | 34.28 |  |  | 5 | 12 | 13 | 1304.09 | 9.61 | 34.47 |  |
| 9 | 11 | 12 | 706.13 | 6.96 | 25.66 |  |  | 7 | 12 | 13 | 1676.75 | 11.46 | 40.4 |  |
| 11 | 11 | 12 | 822.51 | 10.59 | 26.69 |  |  | 9 | 12 | 13 | 1351.28 | 10.61 | 35.84 |  |
| 0 | 12 | 12 | 10994.31 | 88.08 | 101.69 |  |  | 11 | 12 | 13 | 850.22 | 8.27 | 29.92 |  |
| 2 | 12 | 12 | 4137.23 | 38.84 | 63.34 |  |  | 0 | 13 | 13 | 911.51 | 12.09 | 30.1 |  |
| 4 | 12 | 12 | 18127.44 | 132.32 | 128.4 |  |  | 2 | 13 | 13 | 705.54 | 11.15 | 27.01 |  |
| 6 | 12 | 12 | 730.36 | 10.41 | 28.28 |  |  | 4 | 13 | 13 | 884.61 | 11.52 | 28.28 |  |
| 8 | 12 | 12 | 9188.61 | 69.77 | 91.66 |  |  | 6 | 13 | 13 | 2153.5 | 19.78 | 43.01 |  |
| 10 | 12 | 12 | 940.83 | 11.52 | 30.72 |  |  | 8 | 13 | 13 | 425.16 | 8.53 | 19.49 |  |
| 12 | 12 | 12 | 7894.57 | 102.98 | 84.16 |  |  | 10 | 13 | 13 | 735.25 | 11.33 | 28 |  |
| 0 | 1 | 13 | 1696.58 | 10 | 43.07 |  |  | 12 | 13 | 13 | 643.04 | 10.02 | 23.17 |  |
| 1 | 2 | 13 | 1330.6 | 11.68 | 37.46 |  |  | 0 | 0 | 14 | 750.3 | 11.9 | 27.23 |  |
| 0 | 3 | 13 | 2264.4 | 12.89 | 50.17 |  |  | 1 | 1 | 14 | 6227.69 | 43.68 | 80.01 |  |
| 2 | 3 | 13 | 4097.85 | 21.4 | 65.75 |  |  | 0 | 2 | 14 | 3875.98 | 33.87 | 63.06 |  |
| 1 | 4 | 13 | 5344.61 | 28.33 | 73.54 |  |  | 2 | 2 | 14 | 25106.11 | 162.55 | 154.89 |  |
| 3 | 4 | 13 | 3959.45 | 21.89 | 62.93 |  |  | 1 | 3 | 14 | 4412.79 | 23.4 | 67.26 |  |
| 0 | 5 | 13 | 231.76 | 7.6 | 15.58 |  |  | 3 | 3 | 14 | 1001.1 | 10.24 | 32.32 |  |
| 2 | 5 | 13 | 8473.52 | 43.38 | 93.35 |  |  | 0 | 4 | 14 | 4468.75 | 23.61 | 67.56 |  |
| 4 | 5 | 13 | 2941.09 | 16.3 | 54.67 |  |  | 2 | 4 | 14 | 2402.77 | 13.73 | 50.1 |  |
| 1 | 6 | 13 | 2711.09 | 14.94 | 52.93 |  |  | 4 | 4 | 14 | 3089.49 | 25.42 | 55.11 |  |

| h | k | l | Fcal^2 | Fobs^2 | (Fobs^2) | |  | h | k | l | Fcal^2 | Fobs^2 | (Fobs^2) | |
| --- | --- | --- | --- | --- | --- | --- | --- | --- | --- | --- | --- | --- | --- | --- |
|  |  |  |  |  |  |  |  |  |  |  |  |  |  |  |
| 1 | 5 | 14 | 281.08 | 4.13 | 16.7 |  |  | 2 | 14 | 14 | 5371.81 | 47.6 | 70.4 |  |
| 3 | 5 | 14 | 1255.49 | 8.37 | 36.27 |  |  | 4 | 14 | 14 | 1636.15 | 16.58 | 38.53 |  |
| 5 | 5 | 14 | 7145.11 | 52.33 | 84.6 |  |  | 6 | 14 | 14 | 7922.89 | 62.34 | 82.39 |  |
| 0 | 6 | 14 | 1674.95 | 10.49 | 40.68 |  |  | 8 | 14 | 14 | 336.22 | 8.16 | 17.75 |  |
| 2 | 6 | 14 | 18131.15 | 90.92 | 130.59 |  |  | 10 | 14 | 14 | 3569.33 | 32.25 | 57.55 |  |
| 4 | 6 | 14 | 957.42 | 19.53 | 29.87 |  |  | 12 | 14 | 14 | 182.93 | 7.23 | 13.63 |  |
| 6 | 6 | 14 | 11179.73 | 83.21 | 102.64 |  |  | 14 | 14 | 14 | 2108.47 | 42.66 | 41.97 |  |
| 1 | 7 | 14 | 2253.65 | 18.37 | 48.18 |  |  | 0 | 1 | 15 | 658.79 | 5.65 | 26.61 |  |
| 3 | 7 | 14 | 824.27 | 6.57 | 27.97 |  |  | 1 | 2 | 15 | 1502.16 | 10.23 | 40.25 |  |
| 5 | 7 | 14 | 941.61 | 7.43 | 29.42 |  |  | 0 | 3 | 15 | 4450.56 | 25.86 | 67.68 |  |
| 7 | 7 | 14 | 2974.8 | 25.91 | 52.86 |  |  | 2 | 3 | 15 | 1685.78 | 10.1 | 41.21 |  |
| 0 | 8 | 14 | 2352.59 | 14.68 | 47.17 |  |  | 1 | 4 | 15 | 1889.93 | 12.9 | 43.15 |  |
| 2 | 8 | 14 | 2371.26 | 15.84 | 47.81 |  |  | 3 | 4 | 15 | 446.41 | 4.65 | 20.69 |  |
| 4 | 8 | 14 | 770.04 | 6.77 | 29.05 |  |  | 0 | 5 | 15 | 766.37 | 6.18 | 27.08 |  |
| 6 | 8 | 14 | 1741.81 | 22.22 | 41.65 |  |  | 2 | 5 | 15 | 1614.99 | 19.23 | 40.52 |  |
| 8 | 8 | 14 | 1562.5 | 15.48 | 38.96 |  |  | 4 | 5 | 15 | 4196.61 | 35.73 | 65.02 |  |
| 1 | 9 | 14 | 4025.34 | 25.12 | 63.72 |  |  | 1 | 6 | 15 | 2116.79 | 13.16 | 45.12 |  |
| 3 | 9 | 14 | 1343.51 | 9.89 | 36.95 |  |  | 3 | 6 | 15 | 3066.16 | 26.14 | 55.24 |  |
| 5 | 9 | 14 | 373.63 | 4.39 | 16.99 |  |  | 5 | 6 | 15 | 529.86 | 5.51 | 22.74 |  |
| 7 | 9 | 14 | 1841.58 | 13 | 42.69 |  |  | 0 | 7 | 15 | 2131.98 | 13.02 | 45.86 |  |
| 9 | 9 | 14 | 2291.8 | 20.75 | 47.76 |  |  | 2 | 7 | 15 | 1618.39 | 11.02 | 40.22 |  |
| 0 | 10 | 14 | 3006.5 | 19.51 | 54.79 |  |  | 4 | 7 | 15 | 885.1 | 8.56 | 30.07 |  |
| 2 | 10 | 14 | 13537.72 | 75 | 111.92 |  |  | 6 | 7 | 15 | 1904.87 | 11.75 | 42.98 |  |
| 4 | 10 | 14 | 892.06 | 7.36 | 30.54 |  |  | 1 | 8 | 15 | 2600.27 | 16.36 | 50.17 |  |
| 6 | 10 | 14 | 11152.67 | 60.33 | 102.35 |  |  | 3 | 8 | 15 | 2339.54 | 18.81 | 48.5 |  |
| 8 | 10 | 14 | 1370.66 | 10.27 | 37.29 |  |  | 5 | 8 | 15 | 1382.74 | 9.68 | 36.86 |  |
| 10 | 10 | 14 | 5909.84 | 44.65 | 73.51 |  |  | 7 | 8 | 15 | 1817.67 | 12.14 | 41.38 |  |
| 1 | 11 | 14 | 680.28 | 6.96 | 25.11 |  |  | 0 | 9 | 15 | 2745.62 | 17.57 | 52.46 |  |
| 3 | 11 | 14 | 2505.4 | 16.47 | 49.42 |  |  | 2 | 9 | 15 | 1446.97 | 10.6 | 37.14 |  |
| 5 | 11 | 14 | 2024.23 | 13.21 | 45.89 |  |  | 4 | 9 | 15 | 163.77 | 4.19 | 12.45 |  |
| 7 | 11 | 14 | 1012.52 | 8.42 | 31.14 |  |  | 6 | 9 | 15 | 1858.95 | 28.18 | 42.85 |  |
| 9 | 11 | 14 | 371 | 5.5 | 19.34 |  |  | 8 | 9 | 15 | 1255.48 | 9.47 | 35.42 |  |
| 11 | 11 | 14 | 178.05 | 6.12 | 12.5 |  |  | 1 | 10 | 15 | 2631.33 | 17.07 | 50.38 |  |
| 0 | 12 | 14 | 513.95 | 9 | 23.27 |  |  | 3 | 10 | 15 | 263.23 | 4.72 | 16.39 |  |
| 2 | 12 | 14 | 1190.47 | 9.34 | 34.59 |  |  | 5 | 10 | 15 | 1166.16 | 9.34 | 33.99 |  |
| 4 | 12 | 14 | 1025.17 | 23.06 | 31.31 |  |  | 7 | 10 | 15 | 839.35 | 7.42 | 28.4 |  |
| 6 | 12 | 14 | 1173.63 | 9.67 | 33.09 |  |  | 9 | 10 | 15 | 518.48 | 7.89 | 22 |  |
| 8 | 12 | 14 | 691.4 | 6.7 | 26.31 |  |  | 0 | 11 | 15 | 752.07 | 7.35 | 27.24 |  |
| 10 | 12 | 14 | 343.49 | 5.83 | 18.25 |  |  | 2 | 11 | 15 | 948.62 | 8.15 | 30.32 |  |
| 12 | 12 | 14 | 907.86 | 12.82 | 29.96 |  |  | 4 | 11 | 15 | 2341.69 | 15.99 | 47.25 |  |
| 1 | 13 | 14 | 976.98 | 8.67 | 30.47 |  |  | 6 | 11 | 15 | 218.79 | 4.39 | 14.05 |  |
| 3 | 13 | 14 | 983.75 | 8.95 | 30.05 |  |  | 8 | 11 | 15 | 300.53 | 5.31 | 16.25 |  |
| 5 | 13 | 14 | 749.91 | 7.28 | 26.3 |  |  | 10 | 11 | 15 | 801.74 | 7.74 | 26.88 |  |
| 7 | 13 | 14 | 608.76 | 6.94 | 24.08 |  |  | 1 | 12 | 15 | 160.39 | 4.46 | 12.11 |  |
| 9 | 13 | 14 | 465.57 | 6.23 | 20.25 |  |  | 3 | 12 | 15 | 1179.13 | 9.6 | 32.84 |  |
| 11 | 13 | 14 | 393.3 | 14.65 | 19.04 |  |  | 5 | 12 | 15 | 806.43 | 7.22 | 28.63 |  |
| 13 | 13 | 14 | 294.36 | 7.6 | 15.81 |  |  | 7 | 12 | 15 | 414.86 | 7.51 | 19.35 |  |
| 0 | 14 | 14 | 168.16 | 7.04 | 13.42 |  |  | 9 | 12 | 15 | 357.35 | 5.5 | 18.96 |  |

| h | k | l | Fcal^2 | Fobs^2 | (Fobs^2) | |  | h | k | l | Fcal^2 | Fobs^2 | (Fobs^2) | |
| --- | --- | --- | --- | --- | --- | --- | --- | --- | --- | --- | --- | --- | --- | --- |
|  |  |  |  |  |  |  |  |  |  |  |  |  |  |  |
| 7 | 7 | 22 | 271.13 | 8.53 | 15.42 |  |  | 11 | 15 | 22 | 85.37 | 31.22 | 9.87 |  |
| 0 | 8 | 22 | 179.59 | 5.38 | 13.45 |  |  | 0 | 16 | 22 | 0 | 7.92 | 1.01 |  |
| 2 | 8 | 22 | 639.07 | 7.67 | 24.07 |  |  | 2 | 16 | 22 | 174.9 | 8.65 | 13.34 |  |
| 4 | 8 | 22 | 131.57 | 5.63 | 11.13 |  |  | 4 | 16 | 22 | 138.93 | 8.79 | 12.8 |  |
| 6 | 8 | 22 | 415.28 | 6.68 | 19.31 |  |  | 6 | 16 | 22 | 80.8 | 17.78 | 9.41 |  |
| 8 | 8 | 22 | 337.64 | 10.94 | 17.93 |  |  | 8 | 16 | 22 | 158.84 | 16.64 | 14.37 |  |
| 1 | 9 | 22 | 491.9 | 7.15 | 20.9 |  |  | 1 | 17 | 22 | 252.86 | 10.48 | 16.48 |  |
| 3 | 9 | 22 | 541.91 | 7.52 | 22.43 |  |  | 3 | 17 | 22 | 75.17 | 10.68 | 9.63 |  |
| 5 | 9 | 22 | 187.36 | 6.01 | 12.43 |  |  | 5 | 17 | 22 | 90.13 | 25.29 | 8.58 |  |
| 7 | 9 | 22 | 530.25 | 7.4 | 22.27 |  |  | 7 | 17 | 22 | 0.27 | 22.69 | 7.97 |  |
| 9 | 9 | 22 | 383.71 | 11.5 | 18.87 |  |  | 0 | 18 | 22 | 359.67 | 16.09 | 18.82 |  |
| 0 | 10 | 22 | 50.51 | 5.5 | 6.87 |  |  | 2 | 18 | 22 | 859.74 | 14.6 | 30.82 |  |
| 2 | 10 | 22 | 1903.98 | 15.35 | 41.87 |  |  | 4 | 18 | 22 | 76.14 | 18.84 | 10.92 |  |
| 4 | 10 | 22 | 309.73 | 6.29 | 17.4 |  |  | 6 | 18 | 22 | 446.59 | 37.71 | 23.32 |  |
| 6 | 10 | 22 | 2440.81 | 17.67 | 45.55 |  |  | 1 | 19 | 22 | 179.74 | 21.24 | 16.15 |  |
| 8 | 10 | 22 | 162.22 | 6.27 | 13.75 |  |  | 3 | 19 | 22 | 88.1 | 33.53 | 10.55 |  |
| 10 | 10 | 22 | 1514.02 | 19.53 | 37.27 |  |  | 0 | 1 | 23 | 642.28 | 7.74 | 24.16 |  |
| 1 | 11 | 22 | 49.56 | 5.93 | 6.63 |  |  | 1 | 2 | 23 | 576.86 | 7.41 | 23.19 |  |
| 3 | 11 | 22 | 107.98 | 5.83 | 10.23 |  |  | 0 | 3 | 23 | 1164.35 | 10.65 | 32.82 |  |
| 5 | 11 | 22 | 138.37 | 6.2 | 11.76 |  |  | 2 | 3 | 23 | 243.15 | 6.03 | 15.05 |  |
| 7 | 11 | 22 | 189.44 | 6.49 | 13.16 |  |  | 1 | 4 | 23 | 144.31 | 6.21 | 11.58 |  |
| 9 | 11 | 22 | 203.8 | 9.64 | 14.57 |  |  | 3 | 4 | 23 | 254.97 | 6.39 | 14.92 |  |
| 11 | 11 | 22 | 291.87 | 17.05 | 16.12 |  |  | 0 | 5 | 23 | 99.63 | 4.9 | 9.08 |  |
| 0 | 12 | 22 | 147.03 | 7.41 | 12.51 |  |  | 2 | 5 | 23 | 468.09 | 6.75 | 20.62 |  |
| 2 | 12 | 22 | 64.8 | 5.63 | 8.54 |  |  | 4 | 5 | 23 | 614.73 | 7.27 | 24.11 |  |
| 4 | 12 | 22 | 541.52 | 8 | 22.3 |  |  | 1 | 6 | 23 | 436.74 | 6.42 | 19.78 |  |
| 6 | 12 | 22 | 181.5 | 6.58 | 14.35 |  |  | 3 | 6 | 23 | 133.55 | 5.11 | 11.52 |  |
| 8 | 12 | 22 | 114.1 | 9.17 | 11.4 |  |  | 5 | 6 | 23 | 128.33 | 7.69 | 11.24 |  |
| 10 | 12 | 22 | 307.66 | 11.08 | 17.97 |  |  | 0 | 7 | 23 | 364.21 | 6.23 | 18.12 |  |
| 12 | 12 | 22 | 160.56 | 30.77 | 14.45 |  |  | 2 | 7 | 23 | 272.32 | 6.14 | 15.3 |  |
| 1 | 13 | 22 | 369.93 | 7.34 | 18.72 |  |  | 4 | 7 | 23 | 142.31 | 5.41 | 10.98 |  |
| 3 | 13 | 22 | 97.13 | 8.06 | 8.85 |  |  | 6 | 7 | 23 | 305.02 | 9.08 | 17.17 |  |
| 5 | 13 | 22 | 150.59 | 6.42 | 11.04 |  |  | 1 | 8 | 23 | 162.81 | 5.63 | 12.11 |  |
| 7 | 13 | 22 | 137.59 | 6.61 | 11.91 |  |  | 3 | 8 | 23 | 335.98 | 6.49 | 17.59 |  |
| 9 | 13 | 22 | 116.41 | 10.63 | 10.58 |  |  | 5 | 8 | 23 | 182.37 | 5.83 | 13.28 |  |
| 11 | 13 | 22 | 187.95 | 20.82 | 15.29 |  |  | 7 | 8 | 23 | 357.67 | 6.93 | 18.18 |  |
| 0 | 14 | 22 | 738.06 | 8.73 | 26.33 |  |  | 0 | 9 | 23 | 479.47 | 7.27 | 20.93 |  |
| 2 | 14 | 22 | 1652.3 | 19.82 | 38.03 |  |  | 2 | 9 | 23 | 242.45 | 6.95 | 14.92 |  |
| 4 | 14 | 22 | 123.69 | 6.4 | 10.69 |  |  | 4 | 9 | 23 | 82.1 | 5.48 | 9.16 |  |
| 6 | 14 | 22 | 1325.57 | 12.61 | 34.22 |  |  | 6 | 9 | 23 | 405.02 | 7.28 | 19.15 |  |
| 8 | 14 | 22 | 96.1 | 11.77 | 10.2 |  |  | 8 | 9 | 23 | 287.24 | 7.69 | 16.87 |  |
| 10 | 14 | 22 | 1073.06 | 20.29 | 32.2 |  |  | 1 | 10 | 23 | 65.84 | 5.82 | 7.84 |  |
| 12 | 14 | 22 | 91.96 | 28.51 | 9.6 |  |  | 3 | 10 | 23 | 197.93 | 6.42 | 13.42 |  |
| 1 | 15 | 22 | 382.69 | 7.54 | 19.32 |  |  | 5 | 10 | 23 | 327.49 | 8.71 | 18.41 |  |
| 3 | 15 | 22 | 55.5 | 7.06 | 7.25 |  |  | 7 | 10 | 23 | 235.86 | 6.55 | 14.84 |  |
| 5 | 15 | 22 | 228.32 | 8.99 | 15.54 |  |  | 9 | 10 | 23 | 170.89 | 7.8 | 13.54 |  |
| 7 | 15 | 22 | 119.36 | 11.72 | 10.63 |  |  | 0 | 11 | 23 | 49.7 | 5.72 | 6.91 |  |
| 9 | 15 | 22 | 66.01 | 15.65 | 8.82 |  |  | 2 | 11 | 23 | 337.44 | 7.08 | 17.81 |  |

| h | k | l | Fcal^2 | Fobs^2 | (Fobs^2) | |  | h | k | l | Fcal^2 | Fobs^2 | (Fobs^2) | |
| --- | --- | --- | --- | --- | --- | --- | --- | --- | --- | --- | --- | --- | --- | --- |
|  |  |  |  |  |  |  |  |  |  |  |  |  |  |  |
| 4 | 11 | 23 | 234.13 | 6.74 | 15.32 |  |  | 5 | 5 | 24 | 0.51 | 7.41 | 0.59 |  |
| 6 | 11 | 23 | 125.61 | 6.28 | 9.74 |  |  | 0 | 6 | 24 | 346.03 | 6.28 | 17.66 |  |
| 8 | 11 | 23 | 75.98 | 7.07 | 8.08 |  |  | 2 | 6 | 24 | 193.12 | 7.88 | 12.85 |  |
| 10 | 11 | 23 | 74.14 | 12.57 | 7.28 |  |  | 4 | 6 | 24 | 281.12 | 6.36 | 16.02 |  |
| 1 | 12 | 23 | 344.16 | 7.33 | 18.13 |  |  | 6 | 6 | 24 | 139.64 | 8.52 | 12.24 |  |
| 3 | 12 | 23 | 132.5 | 6.62 | 11.08 |  |  | 1 | 7 | 24 | 426.58 | 11.4 | 19.33 |  |
| 5 | 12 | 23 | 225.75 | 6.81 | 14.55 |  |  | 3 | 7 | 24 | 293.89 | 6.42 | 16.71 |  |
| 7 | 12 | 23 | 66.62 | 7.25 | 7.63 |  |  | 5 | 7 | 24 | 467.36 | 7.5 | 21.79 |  |
| 9 | 12 | 23 | 117.08 | 12.66 | 10.84 |  |  | 7 | 7 | 24 | 248.19 | 10.38 | 16.25 |  |
| 11 | 12 | 23 | 163.2 | 26.88 | 13.85 |  |  | 0 | 8 | 24 | 1935.45 | 15.35 | 41.5 |  |
| 0 | 13 | 23 | 206.56 | 6.94 | 14.13 |  |  | 2 | 8 | 24 | 362.11 | 6.88 | 18.49 |  |
| 2 | 13 | 23 | 73.87 | 6.15 | 8.97 |  |  | 4 | 8 | 24 | 1683.55 | 13.3 | 39.5 |  |
| 4 | 13 | 23 | 118.89 | 7.07 | 11.32 |  |  | 6 | 8 | 24 | 308.32 | 7.01 | 17.98 |  |
| 6 | 13 | 23 | 254.87 | 12.33 | 16.29 |  |  | 8 | 8 | 24 | 2283.54 | 25.18 | 45.51 |  |
| 8 | 13 | 23 | 227.85 | 17.98 | 16.08 |  |  | 1 | 9 | 24 | 114.65 | 6.22 | 10.66 |  |
| 10 | 13 | 23 | 76.74 | 22 | 10.6 |  |  | 3 | 9 | 24 | 219.96 | 10.75 | 14.88 |  |
| 1 | 14 | 23 | 231.54 | 8.18 | 15.42 |  |  | 5 | 9 | 24 | 437.05 | 7.41 | 20.43 |  |
| 3 | 14 | 23 | 251.82 | 8.78 | 15.22 |  |  | 7 | 9 | 24 | 197.21 | 7.73 | 14.05 |  |
| 5 | 14 | 23 | 45.75 | 8.5 | 7.03 |  |  | 9 | 9 | 24 | 85.64 | 12.04 | 9.18 |  |
| 7 | 14 | 23 | 132.68 | 13.84 | 10.3 |  |  | 0 | 10 | 24 | 300.15 | 7.14 | 16.94 |  |
| 9 | 14 | 23 | 192.56 | 31.57 | 14.16 |  |  | 2 | 10 | 24 | 194.25 | 6.81 | 13.47 |  |
| 0 | 15 | 23 | 15.39 | 9.07 | 3.56 |  |  | 4 | 10 | 24 | 101.72 | 6.75 | 10.27 |  |
| 2 | 15 | 23 | 64.38 | 9.04 | 7.86 |  |  | 6 | 10 | 24 | 211.54 | 9.17 | 14.74 |  |
| 4 | 15 | 23 | 103.32 | 10.28 | 9.96 |  |  | 8 | 10 | 24 | 142.81 | 8.94 | 12.26 |  |
| 6 | 15 | 23 | 149.52 | 16.11 | 11.95 |  |  | 10 | 10 | 24 | 106.97 | 32.79 | 10.82 |  |
| 8 | 15 | 23 | 191.92 | 27.43 | 14.56 |  |  | 1 | 11 | 24 | 194.19 | 6.55 | 14.17 |  |
| 1 | 16 | 23 | 114.13 | 9.29 | 11.98 |  |  | 3 | 11 | 24 | 109.41 | 6.61 | 10.15 |  |
| 3 | 16 | 23 | 121.1 | 14.18 | 11.98 |  |  | 5 | 11 | 24 | 10.17 | 6.48 | 3.12 |  |
| 5 | 16 | 23 | 139.31 | 18.03 | 13.95 |  |  | 7 | 11 | 24 | 181.14 | 9.41 | 12.45 |  |
| 7 | 16 | 23 | 0.31 | 36.31 | 8.6 |  |  | 9 | 11 | 24 | 4.3 | 101.48 | 15.69 |  |
| 0 | 17 | 23 | 27.59 | 26.52 | 4.05 |  |  | 11 | 11 | 24 | 119.48 | 59.08 | 4.42 |  |
| 2 | 17 | 23 | 73.3 | 19.66 | 10.15 |  |  | 0 | 12 | 24 | 1620.25 | 20.38 | 38.58 |  |
| 4 | 17 | 23 | 69.4 | 26.69 | 10.19 |  |  | 2 | 12 | 24 | 88.88 | 7.07 | 9.34 |  |
| 6 | 17 | 23 | 24.52 | 41.04 | 10.45 |  |  | 4 | 12 | 24 | 664.38 | 10.53 | 24.54 |  |
| 1 | 18 | 23 | 60.08 | 46.03 | 8.82 |  |  | 6 | 12 | 24 | 19.84 | 9.61 | 5.48 |  |
| 3 | 18 | 23 | 49.89 | 34.46 | 10.1 |  |  | 8 | 12 | 24 | 681.26 | 22.32 | 25.83 |  |
| 5 | 18 | 23 | 70.58 | 55.76 | 9.05 |  |  | 10 | 12 | 24 | 122.55 | 26.75 | 13.34 |  |
| 0 | 0 | 24 | 3095.8 | 42.44 | 51.72 |  |  | 1 | 13 | 24 | 111.35 | 8.82 | 10.48 |  |
| 1 | 1 | 24 | 307.97 | 8.53 | 16.54 |  |  | 3 | 13 | 24 | 96.56 | 9.67 | 9.85 |  |
| 0 | 2 | 24 | 433.72 | 8.35 | 19.68 |  |  | 5 | 13 | 24 | 142.11 | 13.1 | 1.32 |  |
| 2 | 2 | 24 | 512.21 | 10.02 | 21.27 |  |  | 7 | 13 | 24 | 91.34 | 17.16 | 10.95 |  |
| 1 | 3 | 24 | 256.74 | 6.22 | 15.43 |  |  | 9 | 13 | 24 | 0.37 | 60.4 | 12.03 |  |
| 3 | 3 | 24 | 169.63 | 8.15 | 12.97 |  |  | 0 | 14 | 24 | 95.17 | 9.55 | 9.91 |  |
| 0 | 4 | 24 | 2809.34 | 18.16 | 50.11 |  |  | 2 | 14 | 24 | 61.63 | 9.5 | 9.18 |  |
| 2 | 4 | 24 | 119.64 | 10.19 | 10.69 |  |  | 4 | 14 | 24 | 13.78 | 17.26 | 5.5 |  |
| 4 | 4 | 24 | 1717.87 | 19.17 | 38.49 |  |  | 6 | 14 | 24 | 93.69 | 15.87 | 11.69 |  |
| 1 | 5 | 24 | 880.98 | 8.99 | 28.1 |  |  | 8 | 14 | 24 | 1.32 | 78.49 | 15.55 |  |
| 3 | 5 | 24 | 107.63 | 5.63 | 9.7 |  |  | 1 | 15 | 24 | 248.99 | 24.29 | 17.41 |  |

| h | k | l | Fcal^2 | Fobs^2 | (Fobs^2) | |  | h | k | l | Fcal^2 | Fobs^2 | (Fobs^2) | |
| --- | --- | --- | --- | --- | --- | --- | --- | --- | --- | --- | --- | --- | --- | --- |
|  |  |  |  |  |  |  |  |  |  |  |  |  |  |  |
| 3 | 15 | 24 | 125.09 | 19.78 | 12.11 |  |  | 0 | 13 | 25 | 261.28 | 16.11 | 17.36 |  |
| 5 | 15 | 24 | 0.15 | 13.52 | 6.28 |  |  | 2 | 13 | 25 | 93.43 | 11.08 | 9.24 |  |
| 0 | 16 | 24 | 760.83 | 30.03 | 29.46 |  |  | 4 | 13 | 25 | 66.06 | 13.95 | 9.17 |  |
| 2 | 16 | 24 | 209.15 | 26.13 | 16.79 |  |  | 6 | 13 | 25 | 61.59 | 43.9 | 7.25 |  |
| 4 | 16 | 24 | 584.09 | 31.66 | 26.75 |  |  | 8 | 13 | 25 | 0 | 0.19 | 11 |  |
| 1 | 17 | 24 | 144.73 | 56.53 | 15.39 |  |  | 1 | 14 | 25 | 122.55 | 30.61 | 13.95 |  |
| 3 | 17 | 24 | 74.03 | 82.63 | 10.7 |  |  | 3 | 14 | 25 | 34.93 | 37.98 | 8.1 |  |
| 0 | 1 | 25 | 290.33 | 7.8 | 16.32 |  |  | 2 | 15 | 25 | 0.2 | 40.11 | 9.23 |  |
| 1 | 2 | 25 | 328.74 | 6.68 | 17.36 |  |  | 4 | 15 | 25 | 30.78 | 27.17 | 6.16 |  |
| 0 | 3 | 25 | 333.75 | 8.06 | 17.36 |  |  | 0 | 0 | 26 | 127.52 | 15.56 | 10.56 |  |
| 2 | 3 | 25 | 282.33 | 6.75 | 16.31 |  |  | 1 | 1 | 26 | 392.55 | 12.05 | 19.16 |  |
| 1 | 4 | 25 | 121.73 | 5.89 | 10.78 |  |  | 0 | 2 | 26 | 138.42 | 6.42 | 11.62 |  |
| 3 | 4 | 25 | 206.82 | 7.13 | 13.96 |  |  | 2 | 2 | 26 | 1756.38 | 19.91 | 40.04 |  |
| 0 | 5 | 25 | 98.58 | 6.22 | 9.64 |  |  | 1 | 3 | 26 | 117.33 | 6.62 | 10.49 |  |
| 2 | 5 | 25 | 240.31 | 9.18 | 15.31 |  |  | 3 | 3 | 26 | 172.97 | 10.56 | 13.7 |  |
| 4 | 5 | 25 | 250.63 | 6.95 | 15.49 |  |  | 0 | 4 | 26 | 74.84 | 8.06 | 8.9 |  |
| 1 | 6 | 25 | 237.81 | 6.54 | 15.52 |  |  | 2 | 4 | 26 | 201.47 | 6.88 | 14.07 |  |
| 3 | 6 | 25 | 56.35 | 5.63 | 7.35 |  |  | 4 | 4 | 26 | 164.96 | 10.56 | 13.93 |  |
| 5 | 6 | 25 | 84.49 | 5.96 | 9.38 |  |  | 1 | 5 | 26 | 152.81 | 6.75 | 12.72 |  |
| 0 | 7 | 25 | 63.99 | 6.48 | 9.22 |  |  | 3 | 5 | 26 | 360.15 | 8.42 | 18.36 |  |
| 2 | 7 | 25 | 215.88 | 6.81 | 14.51 |  |  | 5 | 5 | 26 | 170.72 | 12.04 | 12.84 |  |
| 4 | 7 | 25 | 147.05 | 6.35 | 11.91 |  |  | 0 | 6 | 26 | 140.11 | 7.19 | 12.13 |  |
| 6 | 7 | 25 | 233.77 | 7.85 | 15.72 |  |  | 2 | 6 | 26 | 1146.49 | 12.55 | 32.87 |  |
| 1 | 8 | 25 | 171.88 | 6.68 | 13.11 |  |  | 4 | 6 | 26 | 203.06 | 11.58 | 14.19 |  |
| 3 | 8 | 25 | 282.41 | 7.21 | 16.85 |  |  | 6 | 6 | 26 | 1548.26 | 28.29 | 38.35 |  |
| 5 | 8 | 25 | 184.58 | 9.36 | 13.87 |  |  | 1 | 7 | 26 | 30.05 | 6.88 | 6.05 |  |
| 7 | 8 | 25 | 291.13 | 9.22 | 18.01 |  |  | 3 | 7 | 26 | 173.94 | 8.71 | 13.6 |  |
| 0 | 9 | 25 | 251.18 | 7.67 | 15.02 |  |  | 5 | 7 | 26 | 158.5 | 9.55 | 12.75 |  |
| 2 | 9 | 25 | 197.96 | 7.66 | 14.11 |  |  | 7 | 7 | 26 | 186.1 | 18.16 | 13.96 |  |
| 4 | 9 | 25 | 24.16 | 6.85 | 4.52 |  |  | 0 | 8 | 26 | 215.76 | 8.85 | 15.66 |  |
| 6 | 9 | 25 | 201.93 | 9.49 | 14.41 |  |  | 2 | 8 | 26 | 69.59 | 8.67 | 7.96 |  |
| 8 | 9 | 25 | 123.1 | 13.88 | 11.97 |  |  | 4 | 8 | 26 | 47.2 | 10.74 | 6.77 |  |
| 1 | 10 | 25 | 228.47 | 8.37 | 14.58 |  |  | 6 | 8 | 26 | 116.23 | 10.21 | 11.9 |  |
| 3 | 10 | 25 | 159.13 | 7.99 | 12.54 |  |  | 8 | 8 | 26 | 192.55 | 31.14 | 16.7 |  |
| 5 | 10 | 25 | 57.25 | 11.3 | 6.87 |  |  | 1 | 9 | 26 | 73.97 | 8.73 | 8.55 |  |
| 7 | 10 | 25 | 161.3 | 11.89 | 12.68 |  |  | 3 | 9 | 26 | 131.21 | 9.44 | 11.86 |  |
| 9 | 10 | 25 | 0.19 | 22.05 | 9.85 |  |  | 5 | 9 | 26 | 104.74 | 11.49 | 11.39 |  |
| 0 | 11 | 25 | 419.71 | 8.58 | 20.61 |  |  | 7 | 9 | 26 | 109.29 | 26.31 | 11.49 |  |
| 2 | 11 | 25 | 41.17 | 8.12 | 7.25 |  |  | 9 | 9 | 26 | 0 | 0.19 | 6.55 |  |
| 4 | 11 | 25 | 148.62 | 11.04 | 12.21 |  |  | 0 | 10 | 26 | 107.86 | 11.41 | 11.06 |  |
| 6 | 11 | 25 | 115.65 | 17.94 | 12.17 |  |  | 2 | 10 | 26 | 986.32 | 14.45 | 31.12 |  |
| 8 | 11 | 25 | 27.44 | 26.57 | 6.13 |  |  | 4 | 10 | 26 | 86.43 | 13.49 | 10.12 |  |
| 10 | 11 | 25 | 0.11 | 8.52 | 6.24 |  |  | 6 | 10 | 26 | 548.65 | 23.08 | 24.48 |  |
| 1 | 12 | 25 | 47.19 | 9.76 | 6.8 |  |  | 8 | 10 | 26 | 0 | 0.13 | 8.91 |  |
| 3 | 12 | 25 | 10.52 | 10.36 | 4.81 |  |  | 10 | 10 | 26 | 0 | 0.19 | 25.07 |  |
| 5 | 12 | 25 | 79.64 | 17.7 | 10.2 |  |  | 1 | 11 | 26 | 236.75 | 13.78 | 16.1 |  |
| 7 | 12 | 25 | 22.15 | 17.98 | 5.34 |  |  | 3 | 11 | 26 | 91.21 | 16.9 | 9.22 |  |
| 9 | 12 | 25 | 0 | 4.35 | 8.23 |  |  | 5 | 11 | 26 | 66.45 | 19.06 | 9 |  |

| h | k | l | Fcal^2 | Fobs^2 | (Fobs^2) | |  | h | k | l | Fcal^2 | Fobs^2 | (Fobs^2) | |
| --- | --- | --- | --- | --- | --- | --- | --- | --- | --- | --- | --- | --- | --- | --- |
|  |  |  |  |  |  |  |  |  |  |  |  |  |  |  |
| 7 | 11 | 26 | 8.99 | 22.75 | 3.9 |  |  | 0 | 6 | 28 | 24.47 | 15.69 | 7.33 |  |
| 0 | 12 | 26 | 84.06 | 17.14 | 9.57 |  |  | 2 | 6 | 28 | 60.92 | 18.44 | 8.18 |  |
| 2 | 12 | 26 | 143.54 | 13.17 | 13.96 |  |  | 4 | 6 | 28 | 12.17 | 36.49 | 6.61 |  |
| 4 | 12 | 26 | 68.17 | 35.61 | 8.27 |  |  | 1 | 7 | 28 | 0.2 | 13.8 | 7.28 |  |
| 1 | 13 | 26 | 65.11 | 50.57 | 7.89 |  |  | 3 | 7 | 28 | 36.57 | 32.97 | 8.48 |  |
| 3 | 13 | 26 | 0.23 | 32.51 | 9.87 |  |  | 0 | 8 | 28 | 366.43 | 52.49 | 22.19 |  |
| 2 | 14 | 26 | 0 | 0.19 | 24.31 |  |  | 2 | 8 | 28 | 19.91 | 26.3 | 7.15 |  |
| 0 | 1 | 27 | 167.47 | 8.38 | 13.09 |  |  | 4 | 8 | 28 | 432.51 | 57.16 | 25.97 |  |
| 1 | 2 | 27 | 176.78 | 8.31 | 13.05 |  |  | 1 | 9 | 28 | 0 | 0.19 | 8.65 |  |
| 0 | 3 | 27 | 6.46 | 7.86 | 2.54 |  |  | 1 | 2 | 29 | 10.15 | 31.86 | 7.66 |  |
| 2 | 3 | 27 | 171.29 | 11.12 | 12.94 |  |  | 0 | 3 | 29 | 5.86 | 32.23 | 5.08 |  |
| 1 | 4 | 27 | 52.61 | 8.77 | 7.64 |  |  | 2 | 3 | 29 | 69.65 | 20.89 | 10.61 |  |
| 3 | 4 | 27 | 130.38 | 10.84 | 12.13 |  |  | 1 | 4 | 29 | 78.64 | 28.65 | 12.18 |  |
| 0 | 5 | 27 | 194.8 | 10.26 | 15.15 |  |  | 3 | 4 | 29 | 0.38 | 52.25 | 11.84 |  |
| 2 | 5 | 27 | 30.04 | 9.61 | 5.88 |  |  | 0 | 5 | 29 | 7.15 | 22.04 | 5.51 |  |
| 4 | 5 | 27 | 107.8 | 11.96 | 11.06 |  |  |  |  |  |  |  |  |  |
| 1 | 6 | 27 | 159.27 | 10.58 | 13.34 |  |  |  |  |  |  |  |  |  |
| 3 | 6 | 27 | 126.81 | 12.28 | 12.13 |  |  |  |  |  |  |  |  |  |
| 5 | 6 | 27 | 232.43 | 14.61 | 15.84 |  |  |  |  |  |  |  |  |  |
| 0 | 7 | 27 | 66.73 | 16.02 | 8.56 |  |  |  |  |  |  |  |  |  |
| 2 | 7 | 27 | 43.67 | 11.21 | 7.23 |  |  |  |  |  |  |  |  |  |
| 4 | 7 | 27 | 155.81 | 14.36 | 13.62 |  |  |  |  |  |  |  |  |  |
| 6 | 7 | 27 | 61.55 | 22.69 | 8.16 |  |  |  |  |  |  |  |  |  |
| 1 | 8 | 27 | 106.99 | 19.6 | 11.37 |  |  |  |  |  |  |  |  |  |
| 3 | 8 | 27 | 79.13 | 19.7 | 9.28 |  |  |  |  |  |  |  |  |  |
| 5 | 8 | 27 | 37.04 | 27.66 | 8.68 |  |  |  |  |  |  |  |  |  |
| 0 | 9 | 27 | 30.15 | 26.12 | 5.37 |  |  |  |  |  |  |  |  |  |
| 2 | 9 | 27 | 139.02 | 23.04 | 11.36 |  |  |  |  |  |  |  |  |  |
| 4 | 9 | 27 | 83.91 | 31.63 | 9.42 |  |  |  |  |  |  |  |  |  |
| 6 | 9 | 27 | 40.29 | 47.79 | 6.01 |  |  |  |  |  |  |  |  |  |
| 1 | 10 | 27 | 56.97 | 15.29 | 7.81 |  |  |  |  |  |  |  |  |  |
| 3 | 10 | 27 | 73.07 | 28.02 | 9.79 |  |  |  |  |  |  |  |  |  |
| 5 | 10 | 27 | 0 | 0.19 | 5.14 |  |  |  |  |  |  |  |  |  |
| 0 | 11 | 27 | 89.68 | 19.2 | 12.17 |  |  |  |  |  |  |  |  |  |
| 2 | 11 | 27 | 66.14 | 32.83 | 9.92 |  |  |  |  |  |  |  |  |  |
| 4 | 11 | 27 | 0 | 0.19 | 4.2 |  |  |  |  |  |  |  |  |  |
| 0 | 0 | 28 | 805.86 | 37.88 | 28.98 |  |  |  |  |  |  |  |  |  |
| 1 | 1 | 28 | 75.15 | 14.82 | 7.5 |  |  |  |  |  |  |  |  |  |
| 0 | 2 | 28 | 43.29 | 12.1 | 7.25 |  |  |  |  |  |  |  |  |  |
| 2 | 2 | 28 | 25.84 | 20.56 | 6.82 |  |  |  |  |  |  |  |  |  |
| 1 | 3 | 28 | 301.88 | 27.72 | 18.25 |  |  |  |  |  |  |  |  |  |
| 3 | 3 | 28 | 181.32 | 21.31 | 14.15 |  |  |  |  |  |  |  |  |  |
| 0 | 4 | 28 | 642 | 31.45 | 25.09 |  |  |  |  |  |  |  |  |  |
| 2 | 4 | 28 | 214.27 | 20.9 | 15.8 |  |  |  |  |  |  |  |  |  |
| 4 | 4 | 28 | 916.46 | 36.96 | 31.23 |  |  |  |  |  |  |  |  |  |
| 1 | 5 | 28 | 22.35 | 15 | 5.7 |  |  |  |  |  |  |  |  |  |
| 3 | 5 | 28 | 66.35 | 16.82 | 8.27 |  |  |  |  |  |  |  |  |  |
| 5 | 5 | 28 | 157.69 | 20.2 | 15.52 |  |  |  |  |  |  |  |  |  |

Crystal 7

| h | k | l | Fcal^2 | Fobs^2 | σ(Fobs^2) | |  | h | k | l | Fcal^2 | Fobs^2 | σ(Fobs^2) | |
| --- | --- | --- | --- | --- | --- | --- | --- | --- | --- | --- | --- | --- | --- | --- |
|  |  |  |  |  |  |  |  |  |  |  |  |  |  |  |
| 1 | 1 | 2 | 60984.6 | 949.47 | 224.2 |  |  | 0 | 5 | 7 | 2317.14 | 16.79 | 48.19 |  |
| 0 | 2 | 2 | 18129.51 | 161.14 | 128.34 |  |  | 2 | 5 | 7 | 1685.05 | 8.85 | 40.39 |  |
| 0 | 1 | 3 | 14453.49 | 94.51 | 113.85 |  |  | 4 | 5 | 7 | 4885.13 | 20.35 | 69.42 |  |
| 1 | 2 | 3 | 2506.87 | 18.76 | 48.07 |  |  | 1 | 6 | 7 | 3117.78 | 14.04 | 56.59 |  |
| 0 | 3 | 3 | 3990.1 | 37.54 | 55.62 |  |  | 3 | 6 | 7 | 5187.86 | 21.42 | 71.94 |  |
| 2 | 3 | 3 | 29009.48 | 247.25 | 164.82 |  |  | 5 | 6 | 7 | 2999.59 | 12.82 | 54.28 |  |
| 0 | 0 | 4 | 15.56 | 5.49 | 4.02 |  |  | 0 | 7 | 7 | 5256.47 | 44.86 | 74.26 |  |
| 1 | 1 | 4 | 12834.62 | 76.26 | 108.99 |  |  | 2 | 7 | 7 | 2905.73 | 18.44 | 51.77 |  |
| 0 | 2 | 4 | 2482.91 | 19.02 | 47.87 |  |  | 4 | 7 | 7 | 4043.36 | 23.46 | 61.5 |  |
| 2 | 2 | 4 | 17555.75 | 474.26 | 126.9 |  |  | 6 | 7 | 7 | 4323.36 | 24.6 | 64.72 |  |
| 1 | 3 | 4 | 26289.89 | 170.79 | 155.46 |  |  | 0 | 0 | 8 | 44310.84 | 499.89 | 204.71 |  |
| 3 | 3 | 4 | 30865.88 | 206.13 | 169.59 |  |  | 1 | 1 | 8 | 877.33 | 7.77 | 29.38 |  |
| 0 | 4 | 4 | 75847.78 | 1862.24 | 267.8 |  |  | 0 | 2 | 8 | 563.46 | 5.83 | 24.14 |  |
| 2 | 4 | 4 | 25301.18 | 231.73 | 150.45 |  |  | 2 | 2 | 8 | 8009.33 | 45.26 | 86.38 |  |
| 0 | 1 | 5 | 1532.32 | 17.58 | 36.43 |  |  | 1 | 3 | 8 | 4479.59 | 19.77 | 64.92 |  |
| 1 | 2 | 5 | 2867.16 | 14.72 | 50.85 |  |  | 3 | 3 | 8 | 2137.29 | 14.47 | 44.4 |  |
| 0 | 3 | 5 | 875.88 | 8.72 | 30.01 |  |  | 0 | 4 | 8 | 26201.54 | 166.7 | 163.78 |  |
| 2 | 3 | 5 | 14523.28 | 59.92 | 116.35 |  |  | 2 | 4 | 8 | 6462.23 | 27.22 | 77.92 |  |
| 1 | 4 | 5 | 6750.46 | 29.85 | 80.85 |  |  | 4 | 4 | 8 | 17496.42 | 116.17 | 132.88 |  |
| 3 | 4 | 5 | 3981.07 | 18.41 | 61.3 |  |  | 1 | 5 | 8 | 7214.61 | 31.26 | 85.27 |  |
| 0 | 5 | 5 | 11057.37 | 86.98 | 99.91 |  |  | 3 | 5 | 8 | 2009.33 | 9.76 | 44.96 |  |
| 2 | 5 | 5 | 362.12 | 4.39 | 20.22 |  |  | 5 | 5 | 8 | 1393.74 | 10.3 | 34.27 |  |
| 4 | 5 | 5 | 12268.92 | 66.89 | 107.63 |  |  | 0 | 6 | 8 | 7607.91 | 42.96 | 85.58 |  |
| 0 | 0 | 6 | 1136.6 | 20.14 | 33.58 |  |  | 2 | 6 | 8 | 994.91 | 5.92 | 32.79 |  |
| 1 | 1 | 6 | 4825.35 | 30.71 | 66.07 |  |  | 4 | 6 | 8 | 919.67 | 5.71 | 30.71 |  |
| 0 | 2 | 6 | 5366.09 | 33.66 | 71.26 |  |  | 6 | 6 | 8 | 2004.93 | 13.6 | 45.19 |  |
| 2 | 2 | 6 | 40623.01 | 284.62 | 196.04 |  |  | 1 | 7 | 8 | 3203.58 | 14.07 | 54.84 |  |
| 1 | 3 | 6 | 2595 | 13.24 | 51.52 |  |  | 3 | 7 | 8 | 4710.81 | 22.07 | 67.19 |  |
| 3 | 3 | 6 | 7028.37 | 43.41 | 81.36 |  |  | 5 | 7 | 8 | 3788.67 | 15.66 | 59.96 |  |
| 0 | 4 | 6 | 3005.99 | 21.62 | 54.57 |  |  | 7 | 7 | 8 | 2983.13 | 18.44 | 53.7 |  |
| 2 | 4 | 6 | 5633.89 | 24.95 | 73.87 |  |  | 0 | 8 | 8 | 24098.4 | 253.61 | 153.41 |  |
| 4 | 4 | 6 | 4591.34 | 29.13 | 67.17 |  |  | 2 | 8 | 8 | 4464.91 | 26.17 | 65.97 |  |
| 1 | 5 | 6 | 8690.48 | 35.23 | 89.37 |  |  | 4 | 8 | 8 | 16816.4 | 134.81 | 130.81 |  |
| 3 | 5 | 6 | 8666.64 | 34.79 | 89.74 |  |  | 6 | 8 | 8 | 3344.03 | 20.39 | 57.17 |  |
| 5 | 5 | 6 | 10997.5 | 60.47 | 102.68 |  |  | 8 | 8 | 8 | 8021.32 | 106.96 | 91 |  |
| 0 | 6 | 6 | 6664.47 | 57.68 | 78.16 |  |  | 0 | 1 | 9 | 8188.51 | 46.93 | 88.06 |  |
| 2 | 6 | 6 | 27663.98 | 205.45 | 168.04 |  |  | 1 | 2 | 9 | 6121.75 | 24.93 | 76.35 |  |
| 4 | 6 | 6 | 9048.06 | 49.19 | 92.08 |  |  | 0 | 3 | 9 | 2214.72 | 15.54 | 48.31 |  |
| 6 | 6 | 6 | 44696.45 | 1472.21 | 210.39 |  |  | 2 | 3 | 9 | 1542.78 | 9.41 | 39.06 |  |
| 0 | 1 | 7 | 5510.07 | 33.98 | 71.91 |  |  | 1 | 4 | 9 | 1533.16 | 8.22 | 39.33 |  |
| 1 | 2 | 7 | 6063.96 | 25.75 | 75.78 |  |  | 3 | 4 | 9 | 4429.72 | 18.99 | 66.33 |  |
| 0 | 3 | 7 | 1534.32 | 13.73 | 41.41 |  |  | 0 | 5 | 9 | 1315.63 | 21.97 | 34.58 |  |
| 2 | 3 | 7 | 4084.87 | 18.18 | 60.98 |  |  | 2 | 5 | 9 | 3390.45 | 14.72 | 59.92 |  |
| 1 | 4 | 7 | 5043.73 | 22.62 | 69.16 |  |  | 4 | 5 | 9 | 1853.59 | 10.89 | 42.23 |  |
| 3 | 4 | 7 | 2821.21 | 13.13 | 51.43 |  |  | 1 | 6 | 9 | 2402.48 | 19.69 | 48.17 |  |

| h | k | l | Fcal^2 | Fobs^2 | (Fobs^2) | |  | h | k | l | Fcal^2 | Fobs^2 | (Fobs^2) | |
| --- | --- | --- | --- | --- | --- | --- | --- | --- | --- | --- | --- | --- | --- | --- |
|  |  |  |  |  |  |  |  |  |  |  |  |  |  |  |
| 3 | 6 | 9 | 1688.54 | 8.79 | 41 |  |  | 6 | 10 | 10 | 5841.78 | 41.11 | 77.41 |  |
| 5 | 6 | 9 | 657.51 | 5.21 | 25.86 |  |  | 8 | 10 | 10 | 486.04 | 8.72 | 22.82 |  |
| 0 | 7 | 9 | 3805.6 | 23.2 | 60 |  |  | 10 | 10 | 10 | 3214.15 | 40.79 | 55.57 |  |
| 2 | 7 | 9 | 4240.21 | 20.51 | 63.69 |  |  | 0 | 1 | 11 | 4015.45 | 23.62 | 62.68 |  |
| 4 | 7 | 9 | 762.57 | 5.57 | 27.22 |  |  | 1 | 2 | 11 | 3031.75 | 12.9 | 54.86 |  |
| 6 | 7 | 9 | 1384.14 | 7.78 | 37.1 |  |  | 0 | 3 | 11 | 3323.44 | 43.95 | 58.76 |  |
| 1 | 8 | 9 | 1706.4 | 9.02 | 42.11 |  |  | 2 | 3 | 11 | 985.69 | 6.06 | 31.09 |  |
| 3 | 8 | 9 | 1606.74 | 8.68 | 41.25 |  |  | 1 | 4 | 11 | 149.42 | 6.24 | 12.83 |  |
| 5 | 8 | 9 | 2163.67 | 10.61 | 47.69 |  |  | 3 | 4 | 11 | 2981.03 | 14.63 | 55.43 |  |
| 7 | 8 | 9 | 834.64 | 6.63 | 29.61 |  |  | 0 | 5 | 11 | 1944.59 | 15.56 | 43.53 |  |
| 0 | 9 | 9 | 2662.98 | 24.72 | 50.01 |  |  | 2 | 5 | 11 | 2679.04 | 18.66 | 52.56 |  |
| 2 | 9 | 9 | 2005.54 | 14.85 | 47.48 |  |  | 4 | 5 | 11 | 1702.86 | 9.03 | 40.76 |  |
| 4 | 9 | 9 | 455.93 | 6.77 | 19.38 |  |  | 1 | 6 | 11 | 1753.85 | 19.97 | 43.4 |  |
| 6 | 9 | 9 | 1831.76 | 14.85 | 43.69 |  |  | 3 | 6 | 11 | 2100.44 | 12.48 | 45.07 |  |
| 8 | 9 | 9 | 531.49 | 7.77 | 23.35 |  |  | 5 | 6 | 11 | 590.34 | 9.54 | 24.77 |  |
| 0 | 0 | 10 | 26851.78 | 527.36 | 161.15 |  |  | 0 | 7 | 11 | 1464.46 | 27.47 | 40.88 |  |
| 1 | 1 | 10 | 534.34 | 6.38 | 21.96 |  |  | 2 | 7 | 11 | 1185.78 | 8.06 | 32.78 |  |
| 0 | 2 | 10 | 654.83 | 10.07 | 25.17 |  |  | 4 | 7 | 11 | 2721.14 | 15.86 | 53.01 |  |
| 2 | 2 | 10 | 20358.62 | 119.72 | 143.27 |  |  | 6 | 7 | 11 | 136.28 | 4.33 | 12.16 |  |
| 1 | 3 | 10 | 2705.28 | 14.33 | 51.69 |  |  | 1 | 8 | 11 | 1572.04 | 9.31 | 38.72 |  |
| 3 | 3 | 10 | 8254.83 | 48.72 | 89.26 |  |  | 3 | 8 | 11 | 32.02 | 4.39 | 4.9 |  |
| 0 | 4 | 10 | 30.98 | 4.53 | 6.34 |  |  | 5 | 8 | 11 | 30.66 | 5.47 | 4.4 |  |
| 2 | 4 | 10 | 4572.24 | 23.8 | 66.24 |  |  | 7 | 8 | 11 | 129.59 | 4.33 | 11.44 |  |
| 4 | 4 | 10 | 4165.63 | 23.93 | 65.37 |  |  | 0 | 9 | 11 | 678.13 | 10.99 | 27.98 |  |
| 1 | 5 | 10 | 2651.09 | 30.36 | 50.65 |  |  | 2 | 9 | 11 | 627.81 | 12.57 | 26.18 |  |
| 3 | 5 | 10 | 1646.05 | 10.02 | 39.5 |  |  | 4 | 9 | 11 | 720.76 | 8.17 | 26.71 |  |
| 5 | 5 | 10 | 589.71 | 7.12 | 22.82 |  |  | 6 | 9 | 11 | 523.08 | 7.56 | 23.38 |  |
| 0 | 6 | 10 | 1860.22 | 27.01 | 44.17 |  |  | 8 | 9 | 11 | 877.04 | 7.43 | 29.65 |  |
| 2 | 6 | 10 | 18600.8 | 100.81 | 136.76 |  |  | 1 | 10 | 11 | 128.15 | 4.12 | 13.28 |  |
| 4 | 6 | 10 | 973.81 | 6.63 | 30.67 |  |  | 3 | 10 | 11 | 410.95 | 5.98 | 21.55 |  |
| 6 | 6 | 10 | 5235.56 | 32.06 | 73.4 |  |  | 5 | 10 | 11 | 309.95 | 5.46 | 18.47 |  |
| 1 | 7 | 10 | 2415.57 | 22.39 | 49.34 |  |  | 7 | 10 | 11 | 498.9 | 7.35 | 22.55 |  |
| 3 | 7 | 10 | 893.29 | 6.28 | 32.28 |  |  | 9 | 10 | 11 | 401.65 | 7.13 | 19.7 |  |
| 5 | 7 | 10 | 1443.82 | 10.69 | 39.24 |  |  | 2 | 11 | 11 | 730.23 | 9.71 | 25.96 |  |
| 7 | 7 | 10 | 627.75 | 8.42 | 24.89 |  |  | 4 | 11 | 11 | 33.65 | 9.16 | 6 |  |
| 0 | 8 | 10 | 2113.11 | 16.48 | 47.19 |  |  | 6 | 11 | 11 | 1067.94 | 11.32 | 33.04 |  |
| 2 | 8 | 10 | 2404.25 | 11.75 | 49.61 |  |  | 8 | 11 | 11 | 1005.9 | 11.96 | 31.61 |  |
| 4 | 8 | 10 | 397.8 | 5.81 | 19.35 |  |  | 10 | 11 | 11 | 205.14 | 8.72 | 14.06 |  |
| 6 | 8 | 10 | 1146.94 | 8.71 | 34.03 |  |  | 0 | 0 | 12 | 14161.98 | 182.2 | 121.5 |  |
| 8 | 8 | 10 | 791.54 | 9.37 | 29.32 |  |  | 1 | 1 | 12 | 1603.53 | 11.65 | 40.39 |  |
| 1 | 9 | 10 | 1127.32 | 7.54 | 33.05 |  |  | 0 | 2 | 12 | 2612.33 | 16.83 | 51.11 |  |
| 3 | 9 | 10 | 863.48 | 7.52 | 29.2 |  |  | 2 | 2 | 12 | 1918.92 | 13.26 | 43.96 |  |
| 5 | 9 | 10 | 1110.71 | 7.54 | 33.33 |  |  | 1 | 3 | 12 | 1461.35 | 9.63 | 37.62 |  |
| 7 | 9 | 10 | 523.44 | 5.83 | 23.46 |  |  | 3 | 3 | 12 | 991.98 | 8.99 | 31.74 |  |
| 9 | 9 | 10 | 452.24 | 8.42 | 21.3 |  |  | 0 | 4 | 12 | 10767.86 | 61.76 | 104.62 |  |
| 0 | 10 | 10 | 244.07 | 7.32 | 16.6 |  |  | 2 | 4 | 12 | 656.3 | 6.51 | 25.58 |  |
| 2 | 10 | 10 | 5369.76 | 36.54 | 74.94 |  |  | 4 | 4 | 12 | 14224.87 | 90.94 | 120.6 |  |
| 4 | 10 | 10 | 1123.15 | 10.95 | 34.69 |  |  | 1 | 5 | 12 | 1937.44 | 12.73 | 45.67 |  |

| h | k | l | Fcal^2 | Fobs^2 | (Fobs^2) | |  | h | k | l | Fcal^2 | Fobs^2 | (Fobs^2) | |
| --- | --- | --- | --- | --- | --- | --- | --- | --- | --- | --- | --- | --- | --- | --- |
|  |  |  |  |  |  |  |  |  |  |  |  |  |  |  |
| 3 | 5 | 12 | 1658.9 | 13.46 | 41.44 |  |  | 1 | 6 | 13 | 906.33 | 10.03 | 29.57 |  |
| 5 | 5 | 12 | 1585.42 | 13.6 | 41 |  |  | 3 | 6 | 13 | 426.14 | 5.98 | 20.22 |  |
| 0 | 6 | 12 | 312.87 | 9.61 | 18.61 |  |  | 5 | 6 | 13 | 46.18 | 6.86 | 6.63 |  |
| 2 | 6 | 12 | 2269.12 | 15.34 | 47.76 |  |  | 0 | 7 | 13 | 772.48 | 32.5 | 29.49 |  |
| 4 | 6 | 12 | 2698.65 | 13.49 | 53.01 |  |  | 2 | 7 | 13 | 1305.63 | 16.42 | 36.58 |  |
| 6 | 6 | 12 | 41.21 | 5.18 | 7.18 |  |  | 4 | 7 | 13 | 470.94 | 5.71 | 22.06 |  |
| 1 | 7 | 12 | 140.16 | 4.51 | 11.57 |  |  | 6 | 7 | 13 | 369.91 | 5.65 | 20.12 |  |
| 3 | 7 | 12 | 1108.57 | 10.44 | 32.69 |  |  | 1 | 8 | 13 | 864.43 | 13.11 | 30.68 |  |
| 5 | 7 | 12 | 633.88 | 6.28 | 25.52 |  |  | 3 | 8 | 13 | 32.51 | 4.51 | 6.22 |  |
| 7 | 7 | 12 | 556.88 | 8.34 | 23.92 |  |  | 5 | 8 | 13 | 22.82 | 4.67 | 4.78 |  |
| 0 | 8 | 12 | 4905.58 | 93.84 | 72.22 |  |  | 7 | 8 | 13 | 496.93 | 8.76 | 23.09 |  |
| 2 | 8 | 12 | 372.99 | 6.26 | 19.94 |  |  | 0 | 9 | 13 | 798.88 | 10.3 | 27.45 |  |
| 4 | 8 | 12 | 3287.35 | 18.65 | 58.16 |  |  | 2 | 9 | 13 | 61.72 | 4.58 | 8.24 |  |
| 6 | 8 | 12 | 84.13 | 5.92 | 9.21 |  |  | 4 | 9 | 13 | 608.06 | 10.19 | 24.3 |  |
| 8 | 8 | 12 | 3480.03 | 25.52 | 58.35 |  |  | 6 | 9 | 13 | 764.47 | 7.43 | 28.55 |  |
| 1 | 9 | 12 | 309.48 | 5.3 | 18.27 |  |  | 8 | 9 | 13 | 384.76 | 6.28 | 19.7 |  |
| 3 | 9 | 12 | 994.06 | 9.4 | 32.22 |  |  | 1 | 10 | 13 | 370.12 | 5.98 | 19.59 |  |
| 5 | 9 | 12 | 491.24 | 6.17 | 22.97 |  |  | 3 | 10 | 13 | 787 | 7.84 | 27.95 |  |
| 7 | 9 | 12 | 556.98 | 7.21 | 24.48 |  |  | 5 | 10 | 13 | 592.8 | 9.18 | 24.49 |  |
| 9 | 9 | 12 | 412.84 | 8.72 | 20.77 |  |  | 7 | 10 | 13 | 127.2 | 5.71 | 11.21 |  |
| 0 | 10 | 12 | 178.14 | 6.59 | 13.32 |  |  | 9 | 10 | 13 | 95.91 | 5.79 | 9.88 |  |
| 2 | 10 | 12 | 92.7 | 4.52 | 10.25 |  |  | 2 | 11 | 13 | 286.88 | 5.82 | 17.21 |  |
| 4 | 10 | 12 | 617.01 | 6.38 | 24.62 |  |  | 4 | 11 | 13 | 671.52 | 7.3 | 26.52 |  |
| 6 | 10 | 12 | 761.84 | 7.65 | 27.55 |  |  | 6 | 11 | 13 | 351.4 | 7.36 | 18.67 |  |
| 8 | 10 | 12 | 511.81 | 7 | 23.22 |  |  | 8 | 11 | 13 | 55.87 | 5.34 | 7.63 |  |
| 10 | 10 | 12 | 439.43 | 9.71 | 20.86 |  |  | 10 | 11 | 13 | 193.72 | 6.63 | 13.77 |  |
| 1 | 11 | 12 | 824.63 | 7.83 | 29.1 |  |  | 1 | 12 | 13 | 269.18 | 8.15 | 17.17 |  |
| 3 | 11 | 12 | 1005.36 | 8.46 | 31.49 |  |  | 3 | 12 | 13 | 236.57 | 8.36 | 17 |  |
| 5 | 11 | 12 | 542.7 | 9.5 | 23.46 |  |  | 5 | 12 | 13 | 223.93 | 6.51 | 15.41 |  |
| 7 | 11 | 12 | 223.49 | 8.46 | 15.01 |  |  | 7 | 12 | 13 | 293.65 | 8.53 | 17.57 |  |
| 9 | 11 | 12 | 133.25 | 5.95 | 10.97 |  |  | 9 | 12 | 13 | 216.63 | 6.74 | 15.22 |  |
| 11 | 11 | 12 | 143.58 | 8.72 | 11.8 |  |  | 11 | 12 | 13 | 110.9 | 6.74 | 10.66 |  |
| 0 | 12 | 12 | 2339.8 | 32.96 | 47.78 |  |  | 0 | 13 | 13 | 224.53 | 13.73 | 13.19 |  |
| 2 | 12 | 12 | 1004.56 | 13.26 | 33.25 |  |  | 2 | 13 | 13 | 91.6 | 9.37 | 10.75 |  |
| 4 | 12 | 12 | 3779.26 | 30.41 | 61.18 |  |  | 4 | 13 | 13 | 162.63 | 8.99 | 11.67 |  |
| 6 | 12 | 12 | 78.26 | 6.77 | 10.68 |  |  | 6 | 13 | 13 | 415.72 | 11.01 | 20.09 |  |
| 8 | 12 | 12 | 1573.93 | 16.68 | 39.6 |  |  | 8 | 13 | 13 | 60.36 | 7.42 | 7.67 |  |
| 10 | 12 | 12 | 163.01 | 9.37 | 12.54 |  |  | 10 | 13 | 13 | 86.88 | 8.99 | 9.67 |  |
| 12 | 12 | 12 | 1103.05 | 25.57 | 32.33 |  |  | 12 | 13 | 13 | 77.21 | 10.36 | 8.45 |  |
| 0 | 1 | 13 | 640.41 | 7.77 | 25.6 |  |  | 0 | 0 | 14 | 465.94 | 13.73 | 19.99 |  |
| 1 | 2 | 13 | 472.45 | 4.91 | 22.3 |  |  | 1 | 1 | 14 | 2371.57 | 16.83 | 47.36 |  |
| 0 | 3 | 13 | 734.52 | 10.99 | 28.86 |  |  | 0 | 2 | 14 | 1392.03 | 12.3 | 36.52 |  |
| 2 | 3 | 13 | 1539.53 | 12.53 | 39.56 |  |  | 2 | 2 | 14 | 7412.42 | 52.39 | 87.58 |  |
| 1 | 4 | 13 | 2096 | 31.14 | 45.8 |  |  | 1 | 3 | 14 | 1552.19 | 20.46 | 40.32 |  |
| 3 | 4 | 13 | 1351.93 | 10.68 | 38.17 |  |  | 3 | 3 | 14 | 219.31 | 6.12 | 16.25 |  |
| 0 | 5 | 13 | 27.67 | 5.83 | 4.19 |  |  | 0 | 4 | 14 | 1413.89 | 33.88 | 37.59 |  |
| 2 | 5 | 13 | 3058.49 | 27.14 | 57.48 |  |  | 2 | 4 | 14 | 766.99 | 11.08 | 29.4 |  |
| 4 | 5 | 13 | 999.65 | 7.54 | 31.62 |  |  | 4 | 4 | 14 | 1036.58 | 11.6 | 33.1 |  |

| h | k | l | Fcal^2 | Fobs^2 | (Fobs^2) | |  | h | k | l | Fcal^2 | Fobs^2 | (Fobs^2) | |
| --- | --- | --- | --- | --- | --- | --- | --- | --- | --- | --- | --- | --- | --- | --- |
|  |  |  |  |  |  |  |  |  |  |  |  |  |  |  |
| 1 | 5 | 14 | 107.24 | 6.08 | 9.04 |  |  | 8 | 14 | 14 | 51.38 | 14.65 | 5.92 |  |
| 3 | 5 | 14 | 316.95 | 6.62 | 18.28 |  |  | 10 | 14 | 14 | 347.53 | 14.89 | 18.51 |  |
| 5 | 5 | 14 | 2196.67 | 18.13 | 46.95 |  |  | 0 | 1 | 15 | 155.41 | 5.83 | 12.05 |  |
| 0 | 6 | 14 | 520.15 | 8.34 | 23.07 |  |  | 1 | 2 | 15 | 398.43 | 5.39 | 20.44 |  |
| 2 | 6 | 14 | 4706.49 | 49.86 | 70.13 |  |  | 0 | 3 | 15 | 1371.35 | 37.08 | 38.59 |  |
| 4 | 6 | 14 | 192.83 | 4.79 | 13.76 |  |  | 2 | 3 | 15 | 455.31 | 6.99 | 21.91 |  |
| 6 | 6 | 14 | 2414.02 | 20.07 | 49.65 |  |  | 1 | 4 | 15 | 504.74 | 11.66 | 22.55 |  |
| 1 | 7 | 14 | 613.12 | 10.47 | 26.58 |  |  | 3 | 4 | 15 | 75.69 | 4.33 | 8.62 |  |
| 3 | 7 | 14 | 158.98 | 5.19 | 13.01 |  |  | 0 | 5 | 15 | 163.83 | 7.42 | 12.94 |  |
| 5 | 7 | 14 | 193.25 | 5.14 | 13.46 |  |  | 2 | 5 | 15 | 399.13 | 6.64 | 20.46 |  |
| 7 | 7 | 14 | 718.43 | 11.01 | 27.3 |  |  | 4 | 5 | 15 | 1180.45 | 8.83 | 35.17 |  |
| 0 | 8 | 14 | 626.19 | 13.73 | 25.02 |  |  | 1 | 6 | 15 | 539.37 | 6.53 | 23.48 |  |
| 2 | 8 | 14 | 695.3 | 7.3 | 26.34 |  |  | 3 | 6 | 15 | 841.62 | 7.92 | 29.64 |  |
| 4 | 8 | 14 | 158.84 | 6.08 | 13.02 |  |  | 5 | 6 | 15 | 94.8 | 5.49 | 10.39 |  |
| 6 | 8 | 14 | 380.81 | 6.17 | 19.82 |  |  | 0 | 7 | 15 | 470.9 | 12.82 | 22.57 |  |
| 8 | 8 | 14 | 291.88 | 8.12 | 17.76 |  |  | 2 | 7 | 15 | 421.83 | 6.17 | 19.84 |  |
| 1 | 9 | 14 | 1130.26 | 11.79 | 32.69 |  |  | 4 | 7 | 15 | 190.51 | 10.25 | 14.68 |  |
| 3 | 9 | 14 | 313.28 | 6.26 | 17.91 |  |  | 6 | 7 | 15 | 432.54 | 7.4 | 21.07 |  |
| 5 | 9 | 14 | 85.33 | 5.14 | 9.24 |  |  | 1 | 8 | 15 | 665.08 | 7.45 | 26.33 |  |
| 7 | 9 | 14 | 399.7 | 6.63 | 19.65 |  |  | 3 | 8 | 15 | 545.98 | 7.25 | 23.5 |  |
| 9 | 9 | 14 | 433.84 | 10.02 | 20.51 |  |  | 5 | 8 | 15 | 295.79 | 7.18 | 17.32 |  |
| 0 | 10 | 14 | 667.71 | 13.28 | 26.76 |  |  | 7 | 8 | 15 | 360.66 | 7.08 | 19.11 |  |
| 2 | 10 | 14 | 2828.69 | 16.88 | 52.5 |  |  | 0 | 9 | 15 | 673.81 | 11.32 | 24.47 |  |
| 4 | 10 | 14 | 169.27 | 15.08 | 13.97 |  |  | 2 | 9 | 15 | 310.06 | 6.53 | 17.56 |  |
| 6 | 10 | 14 | 2138 | 13.97 | 45.67 |  |  | 4 | 9 | 15 | 39.03 | 7.69 | 5.04 |  |
| 8 | 10 | 14 | 253.32 | 7.13 | 15.69 |  |  | 6 | 9 | 15 | 348.68 | 6.74 | 18.85 |  |
| 10 | 10 | 14 | 803.45 | 12.3 | 28.29 |  |  | 8 | 9 | 15 | 203.57 | 7.88 | 14.84 |  |
| 1 | 11 | 14 | 93.28 | 5.47 | 10.26 |  |  | 1 | 10 | 15 | 540.48 | 7.6 | 23.79 |  |
| 3 | 11 | 14 | 491.33 | 11.94 | 23.42 |  |  | 3 | 10 | 15 | 26.42 | 5.57 | 5.53 |  |
| 5 | 11 | 14 | 374.74 | 8.15 | 20.27 |  |  | 5 | 10 | 15 | 198.41 | 8.04 | 14.3 |  |
| 7 | 11 | 14 | 167.5 | 6.32 | 13.56 |  |  | 7 | 10 | 15 | 140.19 | 6.28 | 11.83 |  |
| 9 | 11 | 14 | 40.7 | 6.46 | 6.61 |  |  | 9 | 10 | 15 | 63.52 | 6.84 | 8.42 |  |
| 0 | 12 | 14 | 77.61 | 9.06 | 9.05 |  |  | 0 | 11 | 15 | 118.2 | 8.12 | 11.26 |  |
| 2 | 12 | 14 | 216.03 | 8.57 | 14.45 |  |  | 2 | 11 | 15 | 193.94 | 6.14 | 13.12 |  |
| 4 | 12 | 14 | 182.22 | 8.91 | 13.48 |  |  | 4 | 11 | 15 | 400.9 | 8.86 | 20.89 |  |
| 6 | 12 | 14 | 176.25 | 7.56 | 13.84 |  |  | 6 | 11 | 15 | 30.73 | 8.07 | 5.06 |  |
| 8 | 12 | 14 | 102.55 | 6.28 | 10.1 |  |  | 8 | 11 | 15 | 39.42 | 6.34 | 6.15 |  |
| 10 | 12 | 14 | 38.52 | 6.54 | 6.14 |  |  | 10 | 11 | 15 | 99.34 | 7.35 | 9.86 |  |
| 12 | 12 | 14 | 105.46 | 11.65 | 9.98 |  |  | 3 | 12 | 15 | 218.43 | 7.4 | 14.35 |  |
| 1 | 13 | 14 | 165.81 | 7.1 | 13.05 |  |  | 5 | 12 | 15 | 111.9 | 7.69 | 10.86 |  |
| 3 | 13 | 14 | 166.34 | 7 | 12.42 |  |  | 7 | 12 | 15 | 58.87 | 7.07 | 7.12 |  |
| 5 | 13 | 14 | 102.68 | 6.03 | 9.73 |  |  | 9 | 12 | 15 | 48.26 | 7.04 | 6.08 |  |
| 7 | 13 | 14 | 84.32 | 7.04 | 8.78 |  |  | 0 | 13 | 15 | 243.02 | 10.67 | 15 |  |
| 9 | 13 | 14 | 59.3 | 6.98 | 7.57 |  |  | 2 | 13 | 15 | 78.24 | 10.67 | 8.9 |  |
| 11 | 13 | 14 | 42.26 | 11.86 | 6.19 |  |  | 4 | 13 | 15 | 47 | 6.84 | 6.96 |  |
| 2 | 14 | 14 | 760.14 | 13.26 | 27.28 |  |  | 6 | 13 | 15 | 125.83 | 7.75 | 11.1 |  |
| 4 | 14 | 14 | 192.86 | 8.58 | 15.26 |  |  | 8 | 13 | 15 | 107.98 | 7.39 | 10.52 |  |
| 6 | 14 | 14 | 1102.9 | 16.5 | 31.11 |  |  | 12 | 13 | 15 | 55.46 | 15.38 | 6.49 |  |

| h | k | l | Fcal^2 | Fobs^2 | (Fobs^2) | |  | h | k | l | Fcal^2 | Fobs^2 | (Fobs^2) | |
| --- | --- | --- | --- | --- | --- | --- | --- | --- | --- | --- | --- | --- | --- | --- |
|  |  |  |  |  |  |  |  |  |  |  |  |  |  |  |
| 3 | 14 | 15 | 65.71 | 8.46 | 8.46 |  |  | 8 | 12 | 16 | 421.87 | 12.19 | 20.83 |  |
| 5 | 14 | 15 | 155.12 | 11.6 | 11.98 |  |  | 12 | 12 | 16 | 94.39 | 22.01 | 9.4 |  |
| 7 | 14 | 15 | 87.31 | 7.34 | 9.5 |  |  | 3 | 13 | 16 | 58.11 | 6.96 | 7.66 |  |
| 2 | 15 | 15 | 83.26 | 11.65 | 8.32 |  |  | 5 | 13 | 16 | 215.59 | 8.61 | 14.63 |  |
| 4 | 15 | 15 | 48.98 | 15.56 | 7.2 |  |  | 7 | 13 | 16 | 78.78 | 7.76 | 9.35 |  |
| 8 | 15 | 15 | 73.16 | 11.86 | 8.14 |  |  | 0 | 14 | 16 | 114.6 | 11.96 | 10.36 |  |
| 0 | 0 | 16 | 3816.91 | 56.76 | 60.06 |  |  | 2 | 14 | 16 | 49.69 | 8.06 | 6.27 |  |
| 1 | 1 | 16 | 1707.68 | 14.89 | 40.85 |  |  | 4 | 14 | 16 | 69.49 | 9.3 | 8.07 |  |
| 0 | 2 | 16 | 919.75 | 10.67 | 30.56 |  |  | 6 | 14 | 16 | 68.83 | 11.86 | 7.47 |  |
| 2 | 2 | 16 | 169.84 | 6.77 | 13.43 |  |  | 8 | 14 | 16 | 54.27 | 10.19 | 5.49 |  |
| 1 | 3 | 16 | 226.99 | 5.23 | 15.41 |  |  | 1 | 15 | 16 | 62.08 | 8.64 | 7.1 |  |
| 3 | 3 | 16 | 784.25 | 10.02 | 28.3 |  |  | 3 | 15 | 16 | 45.06 | 8.35 | 6.58 |  |
| 0 | 4 | 16 | 2950.98 | 22.89 | 54.82 |  |  | 5 | 15 | 16 | 55.59 | 9.72 | 6.86 |  |
| 2 | 4 | 16 | 229.23 | 5.25 | 15.19 |  |  | 7 | 15 | 16 | 58.2 | 16.03 | 6.06 |  |
| 4 | 4 | 16 | 2128.88 | 19.29 | 46.85 |  |  | 0 | 16 | 16 | 489.82 | 21.06 | 20.72 |  |
| 1 | 5 | 16 | 271.93 | 6.42 | 17.06 |  |  | 4 | 16 | 16 | 171.04 | 15.5 | 13.81 |  |
| 3 | 5 | 16 | 186.16 | 6.83 | 14.32 |  |  | 8 | 16 | 16 | 258.66 | 28.16 | 14.48 |  |
| 5 | 5 | 16 | 215.04 | 8.42 | 14.93 |  |  | 0 | 1 | 17 | 79.49 | 6.77 | 8.57 |  |
| 0 | 6 | 16 | 318.75 | 8.72 | 17.73 |  |  | 1 | 2 | 17 | 405.12 | 5.95 | 19.93 |  |
| 2 | 6 | 16 | 414.4 | 6.53 | 20.74 |  |  | 0 | 3 | 17 | 486.32 | 25.18 | 22.26 |  |
| 4 | 6 | 16 | 38.45 | 4.79 | 5.8 |  |  | 2 | 3 | 17 | 132.58 | 8.18 | 12.11 |  |
| 6 | 6 | 16 | 548.21 | 10.02 | 24.14 |  |  | 1 | 4 | 17 | 83.33 | 5.46 | 9.35 |  |
| 1 | 7 | 16 | 443.59 | 6.91 | 19.89 |  |  | 3 | 4 | 17 | 70.24 | 4.97 | 8.7 |  |
| 3 | 7 | 16 | 369.15 | 8.83 | 18.39 |  |  | 0 | 5 | 17 | 793.15 | 14.65 | 27.41 |  |
| 5 | 7 | 16 | 98.14 | 5 | 10.07 |  |  | 2 | 5 | 17 | 141.3 | 5.9 | 12.21 |  |
| 7 | 7 | 16 | 146.42 | 8.72 | 11.07 |  |  | 4 | 5 | 17 | 402.31 | 13.08 | 20.1 |  |
| 0 | 8 | 16 | 4873.64 | 36.24 | 67.93 |  |  | 1 | 6 | 17 | 518.54 | 7.37 | 22.57 |  |
| 2 | 8 | 16 | 574.41 | 7.68 | 24.06 |  |  | 3 | 6 | 17 | 511.08 | 13.11 | 22.68 |  |
| 4 | 8 | 16 | 1156.51 | 10.17 | 33.21 |  |  | 5 | 6 | 17 | 103.21 | 6.06 | 10.54 |  |
| 6 | 8 | 16 | 165.21 | 7.84 | 12.55 |  |  | 0 | 7 | 17 | 549.03 | 10.3 | 23.17 |  |
| 8 | 8 | 16 | 1880.92 | 19.74 | 42.38 |  |  | 2 | 7 | 17 | 227.5 | 6.36 | 14.15 |  |
| 1 | 9 | 16 | 435.21 | 7.46 | 21.18 |  |  | 4 | 7 | 17 | 52.23 | 8.58 | 6.01 |  |
| 3 | 9 | 16 | 172.51 | 6.67 | 13.13 |  |  | 6 | 7 | 17 | 210.8 | 8.03 | 14.19 |  |
| 5 | 9 | 16 | 460.84 | 7.54 | 21.8 |  |  | 1 | 8 | 17 | 455.09 | 7.37 | 21.1 |  |
| 7 | 9 | 16 | 308.15 | 8.08 | 17.57 |  |  | 3 | 8 | 17 | 282.95 | 7.75 | 16.82 |  |
| 9 | 9 | 16 | 78.18 | 9.71 | 9.69 |  |  | 5 | 8 | 17 | 178.78 | 8.06 | 13.49 |  |
| 0 | 10 | 16 | 148.06 | 10.99 | 11.15 |  |  | 7 | 8 | 17 | 113.36 | 6.63 | 11.02 |  |
| 2 | 10 | 16 | 243.38 | 6.91 | 15.08 |  |  | 0 | 9 | 17 | 188.52 | 9.37 | 11.97 |  |
| 4 | 10 | 16 | 194.72 | 6.72 | 13.89 |  |  | 2 | 9 | 17 | 234.41 | 6.82 | 15.32 |  |
| 8 | 10 | 16 | 150.87 | 15.86 | 12.73 |  |  | 4 | 9 | 17 | 62.65 | 7.54 | 6.72 |  |
| 10 | 10 | 16 | 110.21 | 10.67 | 11.02 |  |  | 6 | 9 | 17 | 136.53 | 6.02 | 13.04 |  |
| 1 | 11 | 16 | 261.15 | 7.14 | 15.7 |  |  | 8 | 9 | 17 | 114.04 | 7.18 | 10.1 |  |
| 5 | 11 | 16 | 96.09 | 7.6 | 9.28 |  |  | 1 | 10 | 17 | 280.85 | 7.76 | 16.3 |  |
| 7 | 11 | 16 | 177.2 | 6.72 | 12.91 |  |  | 5 | 10 | 17 | 56.24 | 6.44 | 6.84 |  |
| 9 | 11 | 16 | 42.24 | 7 | 7.34 |  |  | 7 | 10 | 17 | 69.17 | 6.34 | 8.14 |  |
| 0 | 12 | 16 | 426.79 | 41.66 | 21.46 |  |  | 9 | 10 | 17 | 44.24 | 8.85 | 7.53 |  |
| 4 | 12 | 16 | 1088.55 | 10.85 | 31.65 |  |  | 0 | 11 | 17 | 31.21 | 8.58 | 5.96 |  |
| 6 | 12 | 16 | 212.99 | 9.25 | 15.19 |  |  | 2 | 11 | 17 | 98.11 | 6.67 | 9.45 |  |

| h | k | l | Fcal^2 | Fobs^2 | (Fobs^2) | |  | h | k | l | Fcal^2 | Fobs^2 | (Fobs^2) | |
| --- | --- | --- | --- | --- | --- | --- | --- | --- | --- | --- | --- | --- | --- | --- |
|  |  |  |  |  |  |  |  |  |  |  |  |  |  |  |
| 4 | 11 | 17 | 171.24 | 7.79 | 13.06 |  |  | 3 | 11 | 18 | 174.57 | 8.06 | 13.46 |  |
| 8 | 11 | 17 | 95.71 | 7.8 | 9.69 |  |  | 5 | 11 | 18 | 100.92 | 7.5 | 9.34 |  |
| 10 | 11 | 17 | 74.41 | 9.21 | 8.77 |  |  | 7 | 11 | 18 | 106.74 | 8.83 | 10.21 |  |
| 3 | 12 | 17 | 153.35 | 7.3 | 12.86 |  |  | 2 | 12 | 18 | 70.09 | 7.6 | 8.56 |  |
| 5 | 12 | 17 | 36.57 | 9.65 | 6.77 |  |  | 4 | 12 | 18 | 52.13 | 8.9 | 7.43 |  |
| 0 | 13 | 17 | 34.6 | 11.6 | 6.31 |  |  | 6 | 12 | 18 | 57.39 | 9.54 | 6.39 |  |
| 2 | 13 | 17 | 68.8 | 8.01 | 9.34 |  |  | 3 | 13 | 18 | 148.32 | 9.65 | 11.02 |  |
| 4 | 13 | 17 | 78.84 | 9.57 | 7.92 |  |  | 5 | 13 | 18 | 45.13 | 13.26 | 5.5 |  |
| 8 | 13 | 17 | 49.38 | 10.98 | 6.85 |  |  | 2 | 14 | 18 | 299.11 | 11.43 | 17.11 |  |
| 5 | 14 | 17 | 97.47 | 8.9 | 10.1 |  |  | 6 | 14 | 18 | 201.64 | 14.83 | 14.09 |  |
| 7 | 14 | 17 | 80.46 | 23.8 | 8.77 |  |  | 0 | 1 | 19 | 84.11 | 7.77 | 8.98 |  |
| 0 | 15 | 17 | 81.51 | 12.3 | 8.06 |  |  | 1 | 2 | 19 | 85.13 | 6.12 | 9.11 |  |
| 2 | 15 | 17 | 73.12 | 10.35 | 8.38 |  |  | 2 | 3 | 19 | 189.83 | 6.17 | 13.48 |  |
| 1 | 1 | 18 | 616.26 | 10.36 | 24.37 |  |  | 1 | 4 | 19 | 304.43 | 8.28 | 17.25 |  |
| 0 | 2 | 18 | 342.77 | 9.06 | 18.23 |  |  | 3 | 4 | 19 | 306.73 | 8.69 | 17.47 |  |
| 2 | 2 | 18 | 1454.26 | 14.89 | 37.08 |  |  | 0 | 5 | 19 | 127.17 | 9.06 | 10.36 |  |
| 1 | 3 | 18 | 205.05 | 15.84 | 14.21 |  |  | 2 | 5 | 19 | 260.84 | 8.27 | 16.15 |  |
| 3 | 3 | 18 | 316.12 | 9.71 | 16.99 |  |  | 4 | 5 | 19 | 53.27 | 7.9 | 6.87 |  |
| 0 | 4 | 18 | 311.17 | 9.65 | 17.61 |  |  | 1 | 6 | 19 | 61.04 | 6.82 | 7.68 |  |
| 2 | 4 | 18 | 226.86 | 15.95 | 15.26 |  |  | 3 | 6 | 19 | 110.82 | 9.6 | 10.38 |  |
| 4 | 4 | 18 | 188.17 | 8.99 | 13.94 |  |  | 5 | 6 | 19 | 64.33 | 8.38 | 7.93 |  |
| 1 | 5 | 18 | 196.7 | 8.66 | 13.91 |  |  | 0 | 7 | 19 | 208.95 | 10.3 | 13.76 |  |
| 3 | 5 | 18 | 231.19 | 8.41 | 14.5 |  |  | 2 | 7 | 19 | 168.97 | 7.52 | 12.14 |  |
| 5 | 5 | 18 | 354.89 | 10.02 | 18.15 |  |  | 4 | 7 | 19 | 52.02 | 7.3 | 7.36 |  |
| 0 | 6 | 18 | 27.53 | 8.99 | 6.12 |  |  | 6 | 7 | 19 | 50.43 | 6.77 | 7.12 |  |
| 2 | 6 | 18 | 1665.26 | 15.23 | 39.78 |  |  | 1 | 8 | 19 | 184.62 | 7.91 | 13.05 |  |
| 4 | 6 | 18 | 262.56 | 8.7 | 15.73 |  |  | 3 | 8 | 19 | 42.16 | 6.95 | 5.84 |  |
| 6 | 6 | 18 | 873.02 | 13.6 | 28.55 |  |  | 5 | 8 | 19 | 67.07 | 7.77 | 7.49 |  |
| 1 | 7 | 18 | 200.67 | 6.82 | 14.29 |  |  | 7 | 8 | 19 | 34.71 | 7.5 | 5.75 |  |
| 3 | 7 | 18 | 44.79 | 6.49 | 7.07 |  |  | 0 | 9 | 19 | 70.67 | 9.89 | 7.41 |  |
| 5 | 7 | 18 | 109.79 | 6.95 | 10.4 |  |  | 4 | 9 | 19 | 85.93 | 7.15 | 9.8 |  |
| 7 | 7 | 18 | 124.16 | 10.02 | 11.16 |  |  | 6 | 9 | 19 | 69.86 | 7.54 | 8.03 |  |
| 0 | 8 | 18 | 421.8 | 10.78 | 19.49 |  |  | 8 | 9 | 19 | 45.31 | 8.84 | 5.91 |  |
| 2 | 8 | 18 | 106.85 | 6.58 | 9.53 |  |  | 1 | 10 | 19 | 100.14 | 8.96 | 10.27 |  |
| 4 | 8 | 18 | 70.25 | 6.37 | 8.11 |  |  | 3 | 10 | 19 | 101.2 | 9.77 | 10.01 |  |
| 6 | 8 | 18 | 101.69 | 9.31 | 10.31 |  |  | 5 | 10 | 19 | 49.41 | 8.25 | 7.51 |  |
| 8 | 8 | 18 | 55.15 | 10.36 | 7.23 |  |  | 2 | 11 | 19 | 39.56 | 13.28 | 4.67 |  |
| 1 | 9 | 18 | 135.61 | 7.38 | 10.75 |  |  | 4 | 11 | 19 | 63.84 | 8.88 | 9.37 |  |
| 3 | 9 | 18 | 70.48 | 6.91 | 8.19 |  |  | 6 | 11 | 19 | 56.47 | 9.15 | 6.76 |  |
| 5 | 9 | 18 | 56.52 | 7.8 | 7.08 |  |  | 3 | 12 | 19 | 60.31 | 12.3 | 7.98 |  |
| 7 | 9 | 18 | 57.67 | 7.08 | 7.55 |  |  | 7 | 12 | 19 | 71.18 | 23.35 | 7.12 |  |
| 9 | 9 | 18 | 62.12 | 10.95 | 7.12 |  |  | 0 | 0 | 20 | 759.41 | 26.55 | 26.48 |  |
| 0 | 10 | 18 | 279.61 | 12.82 | 16.83 |  |  | 1 | 1 | 20 | 40.05 | 11.9 | 5.34 |  |
| 2 | 10 | 18 | 793.77 | 9.77 | 27.19 |  |  | 0 | 2 | 20 | 27.34 | 8.07 | 5.18 |  |
| 4 | 10 | 18 | 64.89 | 7.22 | 7.43 |  |  | 2 | 2 | 20 | 180.87 | 8.42 | 13.49 |  |
| 6 | 10 | 18 | 515.07 | 11.16 | 21.78 |  |  | 1 | 3 | 20 | 118.9 | 9.77 | 11.09 |  |
| 10 | 10 | 18 | 346.42 | 15.61 | 19.11 |  |  | 3 | 3 | 20 | 58.62 | 9.06 | 7.08 |  |
| 1 | 11 | 18 | 43.88 | 7.07 | 7.55 |  |  | 0 | 4 | 20 | 720.77 | 13.26 | 25.27 |  |

| h | k | l | Fcal^2 | Fobs^2 | (Fobs^2) | |  | h | k | l | Fcal^2 | Fobs^2 | (Fobs^2) | |
| --- | --- | --- | --- | --- | --- | --- | --- | --- | --- | --- | --- | --- | --- | --- |
|  |  |  |  |  |  |  |  |  |  |  |  |  |  |  |
| 2 | 4 | 20 | 130.18 | 7.4 | 11.3 |  |  | 2 | 6 | 22 | 368 | 12.05 | 18.29 |  |
| 4 | 4 | 20 | 1375.91 | 18.13 | 34.66 |  |  | 6 | 6 | 22 | 174.1 | 19.02 | 12.77 |  |
| 1 | 5 | 20 | 78.84 | 7.06 | 8.51 |  |  | 1 | 7 | 22 | 94.91 | 16.5 | 8.52 |  |
| 3 | 5 | 20 | 207.16 | 7.96 | 13.88 |  |  | 2 | 8 | 22 | 70.25 | 23.09 | 7.46 |  |
| 5 | 5 | 20 | 225.12 | 10.95 | 16.3 |  |  | 2 | 10 | 22 | 111.87 | 15.7 | 10.71 |  |
| 0 | 6 | 20 | 89.73 | 10.3 | 8.99 |  |  | 0 | 1 | 23 | 66 | 14.07 | 7.59 |  |
| 2 | 6 | 20 | 97.26 | 7.71 | 9.82 |  |  | 1 | 2 | 23 | 50.14 | 9.34 | 7.1 |  |
| 4 | 6 | 20 | 169.11 | 8.68 | 12.95 |  |  | 0 | 3 | 23 | 105.29 | 28.38 | 10.13 |  |
| 3 | 7 | 20 | 138.48 | 9.56 | 11.04 |  |  |  |  |  |  |  |  |  |
| 5 | 7 | 20 | 52.39 | 7.96 | 7.76 |  |  |  |  |  |  |  |  |  |
| 7 | 7 | 20 | 58 | 19.23 | 6.34 |  |  |  |  |  |  |  |  |  |
| 0 | 8 | 20 | 537.55 | 12.9 | 21.45 |  |  |  |  |  |  |  |  |  |
| 2 | 8 | 20 | 37.99 | 7.65 | 6.12 |  |  |  |  |  |  |  |  |  |
| 4 | 8 | 20 | 420.18 | 10.2 | 20.06 |  |  |  |  |  |  |  |  |  |
| 8 | 8 | 20 | 166.61 | 14.51 | 13.45 |  |  |  |  |  |  |  |  |  |
| 3 | 9 | 20 | 44.4 | 7.5 | 7.17 |  |  |  |  |  |  |  |  |  |
| 9 | 9 | 20 | 92.08 | 27.47 | 7.73 |  |  |  |  |  |  |  |  |  |
| 6 | 10 | 20 | 82.51 | 10.84 | 8.46 |  |  |  |  |  |  |  |  |  |
| 1 | 11 | 20 | 75.81 | 10.01 | 8.82 |  |  |  |  |  |  |  |  |  |
| 3 | 11 | 20 | 47.61 | 10.62 | 5.79 |  |  |  |  |  |  |  |  |  |
| 0 | 12 | 20 | 154.17 | 19.68 | 12.71 |  |  |  |  |  |  |  |  |  |
| 2 | 12 | 20 | 69.46 | 10.49 | 8.87 |  |  |  |  |  |  |  |  |  |
| 4 | 12 | 20 | 263.78 | 13.6 | 16.42 |  |  |  |  |  |  |  |  |  |
| 8 | 12 | 20 | 120.97 | 33 | 12.83 |  |  |  |  |  |  |  |  |  |
| 0 | 1 | 21 | 120.42 | 21.52 | 10.82 |  |  |  |  |  |  |  |  |  |
| 1 | 2 | 21 | 89.43 | 7.84 | 9.8 |  |  |  |  |  |  |  |  |  |
| 0 | 3 | 21 | 61.57 | 10.02 | 7.43 |  |  |  |  |  |  |  |  |  |
| 2 | 3 | 21 | 51.6 | 6.69 | 6.93 |  |  |  |  |  |  |  |  |  |
| 1 | 4 | 21 | 70.24 | 7.28 | 7.07 |  |  |  |  |  |  |  |  |  |
| 3 | 4 | 21 | 106.58 | 7.98 | 10.39 |  |  |  |  |  |  |  |  |  |
| 2 | 5 | 21 | 95.35 | 7.76 | 9.7 |  |  |  |  |  |  |  |  |  |
| 4 | 5 | 21 | 84.08 | 7.96 | 8.32 |  |  |  |  |  |  |  |  |  |
| 3 | 6 | 21 | 97.78 | 8.44 | 9.41 |  |  |  |  |  |  |  |  |  |
| 5 | 6 | 21 | 62.18 | 13.26 | 6.52 |  |  |  |  |  |  |  |  |  |
| 0 | 7 | 21 | 59.8 | 12.25 | 7.23 |  |  |  |  |  |  |  |  |  |
| 2 | 7 | 21 | 35.95 | 11.32 | 5.87 |  |  |  |  |  |  |  |  |  |
| 4 | 7 | 21 | 126.39 | 9.53 | 10.81 |  |  |  |  |  |  |  |  |  |
| 0 | 9 | 21 | 45.9 | 12.61 | 6.77 |  |  |  |  |  |  |  |  |  |
| 4 | 9 | 21 | 72.22 | 10.55 | 7.88 |  |  |  |  |  |  |  |  |  |
| 5 | 10 | 21 | 77.88 | 21.85 | 6.23 |  |  |  |  |  |  |  |  |  |
| 0 | 0 | 22 | 406.12 | 22.89 | 20.98 |  |  |  |  |  |  |  |  |  |
| 2 | 2 | 22 | 410.1 | 14.2 | 19.93 |  |  |  |  |  |  |  |  |  |
| 1 | 3 | 22 | 67.43 | 8.44 | 8.22 |  |  |  |  |  |  |  |  |  |
| 3 | 3 | 22 | 66.54 | 13.55 | 8.27 |  |  |  |  |  |  |  |  |  |
| 2 | 4 | 22 | 73.19 | 9.15 | 8.03 |  |  |  |  |  |  |  |  |  |
| 4 | 4 | 22 | 109.81 | 14.71 | 9.66 |  |  |  |  |  |  |  |  |  |
| 5 | 5 | 22 | 82.58 | 25.64 | 6 |  |  |  |  |  |  |  |  |  |
| 0 | 6 | 22 | 94.41 | 14.65 | 9.11 |  |  |  |  |  |  |  |  |  |

Crystal 8

| h | k | l | Fcal^2 | Fobs^2 | σ(Fobs^2) | |  | h | k | l | Fcal^2 | Fobs^2 | σ(Fobs^2) | |
| --- | --- | --- | --- | --- | --- | --- | --- | --- | --- | --- | --- | --- | --- | --- |
|  |  |  |  |  |  |  |  |  |  |  |  |  |  |  |
| 0 | 1 | 1 | 227032.77 | 8376.61 | 353.8 |  |  | 2 | 5 | 7 | 1137.57 | 8.29 | 34.61 |  |
| 0 | 0 | 2 | 78300.34 | 1234.94 | 238.37 |  |  | 4 | 5 | 7 | 3223.11 | 17.96 | 56.97 |  |
| 1 | 1 | 2 | 64571.16 | 528.1 | 220.2 |  |  | 1 | 6 | 7 | 2146.43 | 12.74 | 47.52 |  |
| 0 | 2 | 2 | 19059.88 | 179.58 | 125.89 |  |  | 3 | 6 | 7 | 3232.81 | 21.49 | 58.06 |  |
| 0 | 3 | 3 | 4213.8 | 44.2 | 55.68 |  |  | 5 | 6 | 7 | 1806.88 | 12.74 | 43.34 |  |
| 2 | 3 | 3 | 26715.28 | 432.08 | 156.19 |  |  | 0 | 7 | 7 | 3266.75 | 33.15 | 60.56 |  |
| 0 | 0 | 4 | 134.27 | 11.05 | 11.02 |  |  | 2 | 7 | 7 | 1874.3 | 16.52 | 41.45 |  |
| 1 | 1 | 4 | 11920.08 | 73.08 | 105.88 |  |  | 4 | 7 | 7 | 2301.19 | 19.89 | 48.35 |  |
| 0 | 2 | 4 | 2483.74 | 20.44 | 44.26 |  |  | 6 | 7 | 7 | 2295.36 | 21.49 | 46.94 |  |
| 1 | 3 | 4 | 23572.26 | 282.88 | 148.6 |  |  | 0 | 0 | 8 | 32780.09 | 820.53 | 179.5 |  |
| 3 | 3 | 4 | 25940.92 | 224.66 | 156.16 |  |  | 1 | 1 | 8 | 694.59 | 9.77 | 26.04 |  |
| 0 | 4 | 4 | 66753.57 | 1038.79 | 255.53 |  |  | 0 | 2 | 8 | 513.41 | 7.81 | 21.93 |  |
| 2 | 4 | 4 | 21110.16 | 187.27 | 139.5 |  |  | 2 | 2 | 8 | 5588.57 | 38.06 | 74.51 |  |
| 0 | 1 | 5 | 1759.78 | 96.7 | 34.18 |  |  | 1 | 3 | 8 | 3376.71 | 17.96 | 55.33 |  |
| 1 | 2 | 5 | 2659.75 | 15.84 | 48.66 |  |  | 3 | 3 | 8 | 1480.07 | 14.55 | 36.47 |  |
| 0 | 3 | 5 | 763.98 | 9.77 | 28.18 |  |  | 0 | 4 | 8 | 18052.09 | 134.75 | 136.86 |  |
| 2 | 3 | 5 | 12054.12 | 103.14 | 105.9 |  |  | 2 | 4 | 8 | 4409.27 | 22.04 | 64.16 |  |
| 1 | 4 | 5 | 5321.62 | 27.58 | 74.69 |  |  | 4 | 4 | 8 | 11809.21 | 78.96 | 112.33 |  |
| 3 | 4 | 5 | 3224.59 | 17.96 | 54.18 |  |  | 1 | 5 | 8 | 4850.88 | 23.81 | 71.13 |  |
| 0 | 5 | 5 | 8682.24 | 85.64 | 89.02 |  |  | 3 | 5 | 8 | 1318.83 | 9.72 | 36.67 |  |
| 2 | 5 | 5 | 228.25 | 6.63 | 16.56 |  |  | 5 | 5 | 8 | 891.39 | 11.72 | 29 |  |
| 4 | 5 | 5 | 8842.02 | 71.97 | 91.73 |  |  | 0 | 6 | 8 | 4939.92 | 55.25 | 70.3 |  |
| 0 | 0 | 6 | 1203.07 | 24.86 | 34.56 |  |  | 2 | 6 | 8 | 586.75 | 5.79 | 26.5 |  |
| 1 | 1 | 6 | 4392.54 | 32.19 | 59.23 |  |  | 4 | 6 | 8 | 590.91 | 8.42 | 25.07 |  |
| 0 | 2 | 6 | 4595.01 | 33.21 | 64.86 |  |  | 6 | 6 | 8 | 1027.25 | 13.67 | 32.4 |  |
| 2 | 2 | 6 | 34520.04 | 359.44 | 179.09 |  |  | 1 | 7 | 8 | 2053.41 | 12.43 | 43.86 |  |
| 1 | 3 | 6 | 2202.99 | 13.07 | 47.37 |  |  | 3 | 7 | 8 | 2775.07 | 16.2 | 51.74 |  |
| 3 | 3 | 6 | 5137.56 | 35 | 70.44 |  |  | 5 | 7 | 8 | 2018.3 | 14.12 | 43.84 |  |
| 0 | 4 | 6 | 2099.05 | 17.58 | 47.3 |  |  | 7 | 7 | 8 | 1361.74 | 17.58 | 36.61 |  |
| 2 | 4 | 6 | 4295.09 | 23.09 | 65.15 |  |  | 0 | 8 | 8 | 14353.49 | 124.32 | 118.25 |  |
| 4 | 4 | 6 | 3396.61 | 25.4 | 57.13 |  |  | 2 | 8 | 8 | 2460.95 | 20.44 | 50.21 |  |
| 1 | 5 | 6 | 6774.65 | 33.42 | 79.02 |  |  | 4 | 8 | 8 | 8572.57 | 60.96 | 94.29 |  |
| 3 | 5 | 6 | 6546.93 | 32.1 | 77.25 |  |  | 6 | 8 | 8 | 1543.86 | 18.48 | 39.58 |  |
| 5 | 5 | 6 | 7244.29 | 49.56 | 84.07 |  |  | 8 | 8 | 8 | 3543.62 | 62.42 | 59.76 |  |
| 0 | 6 | 6 | 5222.33 | 52.49 | 68.69 |  |  | 0 | 1 | 9 | 5629.9 | 37.12 | 73.84 |  |
| 2 | 6 | 6 | 19521.81 | 176.72 | 143.82 |  |  | 1 | 2 | 9 | 4092.28 | 20.72 | 63.32 |  |
| 4 | 6 | 6 | 6132.49 | 42.85 | 76.32 |  |  | 0 | 3 | 9 | 1456.95 | 19.34 | 40.04 |  |
| 6 | 6 | 6 | 26766.79 | 610.51 | 164.94 |  |  | 2 | 3 | 9 | 1049.56 | 11.2 | 31.72 |  |
| 0 | 1 | 7 | 4485.45 | 32.19 | 65.23 |  |  | 1 | 4 | 9 | 928.08 | 10.2 | 31.42 |  |
| 1 | 2 | 7 | 4646.89 | 26.02 | 67.64 |  |  | 3 | 4 | 9 | 2778.01 | 19.03 | 54.36 |  |
| 0 | 3 | 7 | 1096.51 | 11.72 | 37.64 |  |  | 0 | 5 | 9 | 857.29 | 10.61 | 27.63 |  |
| 2 | 3 | 7 | 3182.72 | 16.58 | 53.44 |  |  | 2 | 5 | 9 | 2038.24 | 12.56 | 48.65 |  |
| 1 | 4 | 7 | 3577.65 | 20.65 | 58.17 |  |  | 4 | 5 | 9 | 1108.46 | 9.26 | 32.65 |  |
| 3 | 4 | 7 | 2147.75 | 13.22 | 45.39 |  |  | 1 | 6 | 9 | 1405.34 | 11.98 | 36.64 |  |
| 0 | 5 | 7 | 1661.22 | 14.55 | 41.64 |  |  | 3 | 6 | 9 | 980.86 | 8.9 | 31.43 |  |

| h | k | l | Fcal^2 | Fobs^2 | (Fobs^2) | |  | h | k | l | Fcal^2 | Fobs^2 | (Fobs^2) | |
| --- | --- | --- | --- | --- | --- | --- | --- | --- | --- | --- | --- | --- | --- | --- |
|  |  |  |  |  |  |  |  |  |  |  |  |  |  |  |
| 5 | 6 | 9 | 367.61 | 5.79 | 19.87 |  |  | 10 | 10 | 10 | 1023.95 | 34.52 | 29.53 |  |
| 0 | 7 | 9 | 2128.13 | 19.54 | 45.29 |  |  | 0 | 1 | 11 | 2335.03 | 19.54 | 48.23 |  |
| 2 | 7 | 9 | 2243.93 | 16.43 | 48.11 |  |  | 1 | 2 | 11 | 1726.04 | 11.37 | 42.12 |  |
| 4 | 7 | 9 | 410.13 | 6.08 | 19.9 |  |  | 0 | 3 | 11 | 1744.44 | 15.63 | 43.64 |  |
| 6 | 7 | 9 | 631.47 | 8.6 | 24.93 |  |  | 2 | 3 | 11 | 552.98 | 7.68 | 22.72 |  |
| 1 | 8 | 9 | 898.84 | 8.29 | 31.07 |  |  | 1 | 4 | 11 | 100.22 | 5.53 | 9.82 |  |
| 3 | 8 | 9 | 771.88 | 8.58 | 29.13 |  |  | 3 | 4 | 11 | 1547.63 | 11.35 | 40.13 |  |
| 5 | 8 | 9 | 968.28 | 10.35 | 31.98 |  |  | 0 | 5 | 11 | 978.14 | 11.72 | 31.61 |  |
| 7 | 8 | 9 | 339.16 | 8.11 | 19.27 |  |  | 2 | 5 | 11 | 1376.21 | 11.05 | 37.49 |  |
| 0 | 9 | 9 | 1442.33 | 22.1 | 35.98 |  |  | 4 | 5 | 11 | 826.88 | 10.36 | 28.55 |  |
| 2 | 9 | 9 | 958.57 | 13.67 | 33.22 |  |  | 1 | 6 | 11 | 844.43 | 8.29 | 30.91 |  |
| 4 | 9 | 9 | 206.74 | 9.19 | 13.16 |  |  | 3 | 6 | 11 | 997.08 | 9.67 | 31.62 |  |
| 6 | 9 | 9 | 731.68 | 14.55 | 27.22 |  |  | 5 | 6 | 11 | 273.94 | 7.65 | 16.82 |  |
| 8 | 9 | 9 | 192.9 | 12.59 | 14.21 |  |  | 0 | 7 | 11 | 680.7 | 11.72 | 29.03 |  |
| 0 | 0 | 10 | 16187.55 | 243.12 | 126.97 |  |  | 2 | 7 | 11 | 557.98 | 8.7 | 22.49 |  |
| 1 | 1 | 10 | 421.8 | 8.63 | 19.41 |  |  | 4 | 7 | 11 | 1155.99 | 10.65 | 34.92 |  |
| 0 | 2 | 10 | 528.19 | 9.77 | 21.92 |  |  | 6 | 7 | 11 | 50.55 | 7.65 | 8.09 |  |
| 2 | 2 | 10 | 12973.71 | 80.1 | 114.37 |  |  | 1 | 8 | 11 | 708.45 | 9.57 | 25.44 |  |
| 1 | 3 | 10 | 1720.99 | 11.05 | 40.95 |  |  | 3 | 8 | 11 | 19.48 | 7.11 | 3.97 |  |
| 3 | 3 | 10 | 5009.89 | 34.15 | 70.97 |  |  | 7 | 8 | 11 | 49.26 | 5.26 | 7.69 |  |
| 2 | 4 | 10 | 2651.3 | 16.26 | 51.08 |  |  | 0 | 9 | 11 | 316.52 | 9.77 | 18.74 |  |
| 4 | 4 | 10 | 2185.03 | 19.54 | 48.07 |  |  | 2 | 9 | 11 | 249.01 | 5.79 | 16.62 |  |
| 1 | 5 | 10 | 1544.44 | 11.37 | 37.35 |  |  | 4 | 9 | 11 | 269.08 | 8.04 | 16.4 |  |
| 3 | 5 | 10 | 982.25 | 8.53 | 30.55 |  |  | 6 | 9 | 11 | 195.47 | 6.47 | 14.29 |  |
| 5 | 5 | 10 | 372.02 | 9.77 | 17.74 |  |  | 8 | 9 | 11 | 266.47 | 17.12 | 16.3 |  |
| 0 | 6 | 10 | 1008.42 | 24.86 | 31.37 |  |  | 1 | 10 | 11 | 46.61 | 5.53 | 8.43 |  |
| 2 | 6 | 10 | 10097.07 | 55.8 | 101.14 |  |  | 3 | 10 | 11 | 166.34 | 10.2 | 13.31 |  |
| 4 | 6 | 10 | 542.83 | 7.19 | 23 |  |  | 5 | 10 | 11 | 97.27 | 6.29 | 10.8 |  |
| 6 | 6 | 10 | 2656.2 | 24.36 | 51.86 |  |  | 7 | 10 | 11 | 147.17 | 9.82 | 12.21 |  |
| 1 | 7 | 10 | 1234.76 | 9.97 | 35.5 |  |  | 9 | 10 | 11 | 111.1 | 9.52 | 10.3 |  |
| 3 | 7 | 10 | 449.78 | 7.65 | 23.16 |  |  | 2 | 11 | 11 | 272.6 | 9.77 | 15.83 |  |
| 5 | 7 | 10 | 695.36 | 9.57 | 27.33 |  |  | 6 | 11 | 11 | 325.83 | 12.59 | 17.97 |  |
| 7 | 7 | 10 | 294.44 | 10.61 | 17.69 |  |  | 8 | 11 | 11 | 310.45 | 14.55 | 16.03 |  |
| 0 | 8 | 10 | 1049.21 | 13.67 | 32.83 |  |  | 10 | 11 | 11 | 68.41 | 14.55 | 7.04 |  |
| 2 | 8 | 10 | 1130.69 | 9.97 | 34.18 |  |  | 0 | 0 | 12 | 7832.93 | 104.98 | 91.42 |  |
| 4 | 8 | 10 | 173 | 6.1 | 13.17 |  |  | 1 | 1 | 12 | 889.33 | 11.72 | 30.6 |  |
| 6 | 8 | 10 | 483.06 | 8.42 | 22.14 |  |  | 0 | 2 | 12 | 1390.93 | 15.63 | 36.95 |  |
| 8 | 8 | 10 | 256.43 | 11.24 | 16.81 |  |  | 2 | 2 | 12 | 904.4 | 12.59 | 31.06 |  |
| 1 | 9 | 10 | 558.96 | 6.91 | 23.21 |  |  | 1 | 3 | 12 | 823.18 | 8.29 | 27.37 |  |
| 3 | 9 | 10 | 386.92 | 7.5 | 19.26 |  |  | 3 | 3 | 12 | 537.33 | 10.61 | 23.62 |  |
| 5 | 9 | 10 | 424.02 | 8.84 | 20.7 |  |  | 0 | 4 | 12 | 5502.89 | 38.06 | 73.74 |  |
| 7 | 9 | 10 | 191.84 | 7.88 | 14.28 |  |  | 2 | 4 | 12 | 390.56 | 6.91 | 19.34 |  |
| 9 | 9 | 10 | 138.48 | 12.59 | 11.91 |  |  | 4 | 4 | 12 | 6795.79 | 48.72 | 82.49 |  |
| 0 | 10 | 10 | 101.02 | 11.05 | 11.51 |  |  | 1 | 5 | 12 | 928.77 | 8.84 | 31.41 |  |
| 2 | 10 | 10 | 2299.46 | 25.17 | 49.04 |  |  | 3 | 5 | 12 | 822.51 | 9.28 | 29.01 |  |
| 4 | 10 | 10 | 447.29 | 11.24 | 21.31 |  |  | 5 | 5 | 12 | 672.79 | 12.59 | 27.03 |  |
| 6 | 10 | 10 | 2185.61 | 27.14 | 45.85 |  |  | 0 | 6 | 12 | 147.79 | 8.29 | 12.32 |  |
| 8 | 10 | 10 | 178.24 | 12.59 | 12.78 |  |  | 2 | 6 | 12 | 1019.67 | 12.78 | 31.68 |  |

| h | k | l | Fcal^2 | Fobs^2 | (Fobs^2) | |  | h | k | l | Fcal^2 | Fobs^2 | (Fobs^2) | |
| --- | --- | --- | --- | --- | --- | --- | --- | --- | --- | --- | --- | --- | --- | --- |
|  |  |  |  |  |  |  |  |  |  |  |  |  |  |  |
| 4 | 6 | 12 | 1186.14 | 14.66 | 34.5 |  |  | 4 | 9 | 13 | 204.46 | 6.29 | 13.92 |  |
| 1 | 7 | 12 | 72.33 | 5.53 | 8.15 |  |  | 6 | 9 | 13 | 221.02 | 8.7 | 15.4 |  |
| 3 | 7 | 12 | 470.93 | 8.29 | 21.05 |  |  | 8 | 9 | 13 | 103.37 | 8.22 | 10.05 |  |
| 5 | 7 | 12 | 247.33 | 7.65 | 15.69 |  |  | 1 | 10 | 13 | 112.76 | 5.79 | 11.19 |  |
| 7 | 7 | 12 | 193.14 | 9.77 | 14.37 |  |  | 3 | 10 | 13 | 259.8 | 7.19 | 16.15 |  |
| 0 | 8 | 12 | 2006.96 | 21.49 | 46.74 |  |  | 5 | 10 | 13 | 182.03 | 8.42 | 13.5 |  |
| 2 | 8 | 12 | 149.35 | 5.79 | 12.86 |  |  | 7 | 10 | 13 | 34.82 | 6.29 | 5.59 |  |
| 4 | 8 | 12 | 1323.62 | 16.26 | 36.27 |  |  | 2 | 11 | 13 | 80.55 | 7.32 | 9.18 |  |
| 6 | 8 | 12 | 38.83 | 8.63 | 6.08 |  |  | 4 | 11 | 13 | 199.81 | 8.84 | 13.79 |  |
| 8 | 8 | 12 | 1204.41 | 20.44 | 33.23 |  |  | 6 | 11 | 13 | 94.42 | 6.95 | 9.12 |  |
| 1 | 9 | 12 | 119.13 | 5.79 | 11.35 |  |  | 1 | 12 | 13 | 58.83 | 6.47 | 8.55 |  |
| 3 | 9 | 12 | 347.42 | 8.07 | 19.08 |  |  | 3 | 12 | 13 | 64.61 | 6.95 | 8.82 |  |
| 5 | 9 | 12 | 188.65 | 7.5 | 13.5 |  |  | 5 | 12 | 13 | 56.39 | 6.8 | 8.03 |  |
| 7 | 9 | 12 | 168.65 | 8.63 | 13.6 |  |  | 7 | 12 | 13 | 68.61 | 8.29 | 8.18 |  |
| 9 | 9 | 12 | 117.04 | 13.26 | 10.72 |  |  | 0 | 13 | 13 | 52.04 | 11.05 | 5.75 |  |
| 0 | 10 | 12 | 74.96 | 23.48 | 8.68 |  |  | 4 | 13 | 13 | 54.79 | 11.24 | 5.49 |  |
| 2 | 10 | 12 | 32.76 | 5.18 | 6.05 |  |  | 6 | 13 | 13 | 93.32 | 12.59 | 9.3 |  |
| 4 | 10 | 12 | 204.41 | 7.09 | 13.76 |  |  | 0 | 0 | 14 | 205.74 | 19.34 | 13.57 |  |
| 6 | 10 | 12 | 224.86 | 7.87 | 14.81 |  |  | 1 | 1 | 14 | 1005.32 | 15.63 | 31.35 |  |
| 8 | 10 | 12 | 145.88 | 15.27 | 12.05 |  |  | 0 | 2 | 14 | 569.72 | 20.72 | 24.43 |  |
| 10 | 10 | 12 | 129.81 | 13.26 | 9.77 |  |  | 2 | 2 | 14 | 3084.91 | 28.28 | 56.34 |  |
| 1 | 11 | 12 | 270.63 | 6.91 | 16.55 |  |  | 1 | 3 | 14 | 641.5 | 10.02 | 25.97 |  |
| 3 | 11 | 12 | 330.91 | 7.95 | 17.85 |  |  | 3 | 3 | 14 | 84.02 | 8.63 | 10.05 |  |
| 5 | 11 | 12 | 161.51 | 7.46 | 12.97 |  |  | 0 | 4 | 14 | 527.93 | 11.72 | 23.17 |  |
| 7 | 11 | 12 | 55.75 | 6.91 | 7.52 |  |  | 2 | 4 | 14 | 316.71 | 7.98 | 18.28 |  |
| 9 | 11 | 12 | 36.93 | 11.72 | 5.35 |  |  | 4 | 4 | 14 | 340.74 | 9.77 | 19.18 |  |
| 0 | 12 | 12 | 646.97 | 19.34 | 25.02 |  |  | 1 | 5 | 14 | 46.05 | 6.08 | 6.15 |  |
| 2 | 12 | 12 | 250.71 | 10.61 | 18.21 |  |  | 3 | 5 | 14 | 121.39 | 6.1 | 11.49 |  |
| 4 | 12 | 12 | 1151.12 | 18.48 | 33.14 |  |  | 5 | 5 | 14 | 778.28 | 12.59 | 27.41 |  |
| 8 | 12 | 12 | 408.41 | 17.26 | 18.45 |  |  | 0 | 6 | 14 | 209.11 | 9.77 | 15.18 |  |
| 0 | 1 | 13 | 281.38 | 9.77 | 17.87 |  |  | 2 | 6 | 14 | 1771.64 | 27.72 | 42.11 |  |
| 1 | 2 | 13 | 206.93 | 6.8 | 15.36 |  |  | 4 | 6 | 14 | 56.46 | 5.06 | 8.21 |  |
| 0 | 3 | 13 | 300.96 | 9.77 | 18.71 |  |  | 6 | 6 | 14 | 781.08 | 14.55 | 28.37 |  |
| 2 | 3 | 13 | 692 | 13.57 | 26.5 |  |  | 1 | 7 | 14 | 221.41 | 7.32 | 15.53 |  |
| 1 | 4 | 13 | 969.84 | 11.41 | 31.51 |  |  | 3 | 7 | 14 | 65.43 | 11.2 | 7.64 |  |
| 3 | 4 | 13 | 552.71 | 8.94 | 24.53 |  |  | 5 | 7 | 14 | 57.51 | 8.22 | 7.77 |  |
| 2 | 5 | 13 | 1244.15 | 13.9 | 36.59 |  |  | 7 | 7 | 14 | 193.22 | 9.77 | 14.73 |  |
| 4 | 5 | 13 | 383.13 | 8.84 | 19.95 |  |  | 0 | 8 | 14 | 183.16 | 16.58 | 13.5 |  |
| 1 | 6 | 13 | 361.27 | 7.19 | 18.91 |  |  | 2 | 8 | 14 | 204.25 | 6.47 | 13.75 |  |
| 3 | 6 | 13 | 176.78 | 5.79 | 13.03 |  |  | 4 | 8 | 14 | 56.91 | 5.49 | 7.79 |  |
| 0 | 7 | 13 | 311.41 | 11.05 | 17.8 |  |  | 6 | 8 | 14 | 117.94 | 6.7 | 10.58 |  |
| 2 | 7 | 13 | 486.96 | 7.5 | 22.61 |  |  | 8 | 8 | 14 | 96.27 | 11.24 | 8.68 |  |
| 4 | 7 | 13 | 179.29 | 7.78 | 13.67 |  |  | 1 | 9 | 14 | 350.67 | 9.24 | 18.42 |  |
| 6 | 7 | 13 | 135.02 | 6.1 | 12.15 |  |  | 3 | 9 | 14 | 95.37 | 6.47 | 9.5 |  |
| 1 | 8 | 13 | 305.39 | 6.91 | 18.58 |  |  | 5 | 9 | 14 | 33.12 | 10.61 | 5.42 |  |
| 7 | 8 | 13 | 146.44 | 7.25 | 12.45 |  |  | 7 | 9 | 14 | 107.68 | 10.14 | 9.95 |  |
| 0 | 9 | 13 | 292.18 | 9.77 | 16.31 |  |  | 9 | 9 | 14 | 101.24 | 10.61 | 9.73 |  |
| 2 | 9 | 13 | 40.71 | 5.69 | 4.94 |  |  | 0 | 10 | 14 | 190.57 | 24.86 | 14.64 |  |

| h | k | l | Fcal^2 | Fobs^2 | (Fobs^2) | |  | h | k | l | Fcal^2 | Fobs^2 | (Fobs^2) | |
| --- | --- | --- | --- | --- | --- | --- | --- | --- | --- | --- | --- | --- | --- | --- |
|  |  |  |  |  |  |  |  |  |  |  |  |  |  |  |
| 2 | 10 | 14 | 810.52 | 11.37 | 28.03 |  |  | 1 | 1 | 16 | 549.18 | 11.72 | 23.85 |  |
| 4 | 10 | 14 | 51.36 | 7.32 | 7.89 |  |  | 0 | 2 | 16 | 309.55 | 13.81 | 18.53 |  |
| 6 | 10 | 14 | 587.21 | 10.92 | 23.06 |  |  | 2 | 2 | 16 | 57.46 | 13.81 | 7.9 |  |
| 8 | 10 | 14 | 47.75 | 7.86 | 7.41 |  |  | 1 | 3 | 16 | 81.36 | 6.91 | 9.2 |  |
| 10 | 10 | 14 | 186.21 | 19.54 | 12.41 |  |  | 3 | 3 | 16 | 241.57 | 10.61 | 15.83 |  |
| 3 | 11 | 14 | 127.07 | 8.72 | 11.86 |  |  | 0 | 4 | 16 | 917.29 | 15.63 | 30.87 |  |
| 5 | 11 | 14 | 100.25 | 8.38 | 10.18 |  |  | 2 | 4 | 16 | 79.5 | 6.91 | 8.32 |  |
| 7 | 11 | 14 | 42.23 | 9.19 | 6.73 |  |  | 4 | 4 | 16 | 658.78 | 13.67 | 25.32 |  |
| 2 | 12 | 14 | 58.47 | 8.72 | 6.8 |  |  | 1 | 5 | 16 | 75.93 | 7.68 | 9.13 |  |
| 4 | 12 | 14 | 41.95 | 9.77 | 6.29 |  |  | 3 | 5 | 16 | 55.35 | 6.1 | 7.56 |  |
| 6 | 12 | 14 | 50.05 | 8.11 | 6.21 |  |  | 5 | 5 | 16 | 48.33 | 8.63 | 6.87 |  |
| 1 | 13 | 14 | 29.94 | 6.47 | 5.57 |  |  | 0 | 6 | 16 | 76.95 | 9.77 | 9.08 |  |
| 3 | 13 | 14 | 49.41 | 10.61 | 5.66 |  |  | 2 | 6 | 16 | 114.77 | 7.68 | 11.01 |  |
| 2 | 14 | 14 | 141.54 | 15.27 | 11.65 |  |  | 6 | 6 | 16 | 119.66 | 10.61 | 11.33 |  |
| 6 | 14 | 14 | 226.85 | 22.99 | 12.48 |  |  | 1 | 7 | 16 | 127.04 | 6.91 | 10.49 |  |
| 0 | 1 | 15 | 43.73 | 11.05 | 7.47 |  |  | 3 | 7 | 16 | 92.33 | 6.91 | 9.5 |  |
| 1 | 2 | 15 | 130.42 | 6.91 | 12.29 |  |  | 5 | 7 | 16 | 37.46 | 9.77 | 5.5 |  |
| 0 | 3 | 15 | 503.71 | 15.2 | 23.06 |  |  | 7 | 7 | 16 | 44 | 9.77 | 5.63 |  |
| 2 | 3 | 15 | 156.2 | 6.91 | 13.28 |  |  | 0 | 8 | 16 | 1287.22 | 53.87 | 33.94 |  |
| 1 | 4 | 15 | 170.31 | 6.91 | 13.28 |  |  | 2 | 8 | 16 | 135.7 | 7.32 | 12.47 |  |
| 3 | 4 | 15 | 22.77 | 7.81 | 5.07 |  |  | 4 | 8 | 16 | 289.31 | 8.84 | 16.73 |  |
| 0 | 5 | 15 | 70.08 | 8.63 | 8.1 |  |  | 6 | 8 | 16 | 45.58 | 6.7 | 6.32 |  |
| 2 | 5 | 15 | 141.88 | 6.91 | 11.48 |  |  | 8 | 8 | 16 | 419.54 | 17.58 | 19.05 |  |
| 4 | 5 | 15 | 380.26 | 7.87 | 19.44 |  |  | 1 | 9 | 16 | 91.59 | 7.5 | 10.45 |  |
| 1 | 6 | 15 | 171.63 | 6.91 | 13.53 |  |  | 3 | 9 | 16 | 44.41 | 9.77 | 6.63 |  |
| 3 | 6 | 15 | 249.27 | 6.91 | 16.44 |  |  | 5 | 9 | 16 | 93.7 | 8.38 | 10.26 |  |
| 5 | 6 | 15 | 33.97 | 7.81 | 5.41 |  |  | 7 | 9 | 16 | 57.13 | 8.9 | 7.9 |  |
| 0 | 7 | 15 | 140.74 | 9.77 | 11.56 |  |  | 0 | 10 | 16 | 31.5 | 9.77 | 5.36 |  |
| 2 | 7 | 15 | 136.09 | 6.47 | 10.88 |  |  | 2 | 10 | 16 | 41.93 | 7.19 | 6.56 |  |
| 4 | 7 | 15 | 56 | 6.8 | 7.78 |  |  | 4 | 10 | 16 | 41.78 | 6.42 | 6.36 |  |
| 6 | 7 | 15 | 121.68 | 8.7 | 11.13 |  |  | 1 | 11 | 16 | 62.82 | 9.41 | 7.01 |  |
| 1 | 8 | 15 | 203.28 | 6.91 | 14.51 |  |  | 0 | 12 | 16 | 85.65 | 14.55 | 9.91 |  |
| 3 | 8 | 15 | 154.26 | 7.68 | 12.35 |  |  | 4 | 12 | 16 | 195.57 | 14.88 | 12.56 |  |
| 5 | 8 | 15 | 87.51 | 8.7 | 9.38 |  |  | 8 | 12 | 16 | 124.64 | 34.71 | 7.89 |  |
| 7 | 8 | 15 | 77.14 | 6.8 | 9.26 |  |  | 1 | 2 | 17 | 109.51 | 6.91 | 10.4 |  |
| 0 | 9 | 15 | 177.38 | 13.81 | 12.21 |  |  | 0 | 3 | 17 | 139.67 | 16.58 | 11.99 |  |
| 2 | 9 | 15 | 86.22 | 9.62 | 8.77 |  |  | 2 | 3 | 17 | 38.8 | 6.91 | 6.51 |  |
| 6 | 9 | 15 | 92.17 | 7.88 | 9.26 |  |  | 0 | 5 | 17 | 223.48 | 11.72 | 14.23 |  |
| 8 | 9 | 15 | 46.76 | 9.77 | 6.82 |  |  | 4 | 5 | 17 | 94.56 | 7.68 | 10.01 |  |
| 1 | 10 | 15 | 123.73 | 6.91 | 11.66 |  |  | 1 | 6 | 17 | 139.12 | 8.26 | 11.41 |  |
| 5 | 10 | 15 | 48.46 | 8.94 | 6.83 |  |  | 3 | 6 | 17 | 123.22 | 6.91 | 10.88 |  |
| 7 | 10 | 15 | 38.41 | 8.11 | 5.51 |  |  | 5 | 6 | 17 | 31.48 | 9.77 | 5.23 |  |
| 2 | 11 | 15 | 46.21 | 7.19 | 5.83 |  |  | 0 | 7 | 17 | 132.66 | 15.2 | 10.99 |  |
| 4 | 11 | 15 | 83.47 | 10.16 | 9.8 |  |  | 2 | 7 | 17 | 59.19 | 6.91 | 6.65 |  |
| 3 | 12 | 15 | 41.65 | 7.87 | 6.23 |  |  | 6 | 7 | 17 | 49.26 | 12.59 | 6.1 |  |
| 5 | 12 | 15 | 39.02 | 12.59 | 4.58 |  |  | 1 | 8 | 17 | 97.98 | 7.19 | 9.79 |  |
| 0 | 13 | 15 | 48.32 | 11.24 | 6.27 |  |  | 3 | 8 | 17 | 64.91 | 7.5 | 7.84 |  |
| 0 | 0 | 16 | 1365.33 | 38.68 | 35.3 |  |  | 5 | 8 | 17 | 45.09 | 7.87 | 5.73 |  |

| h | k | l | Fcal^2 | Fobs^2 | (Fobs^2) | |  | h | k | l | Fcal^2 | Fobs^2 | (Fobs^2) | |
| --- | --- | --- | --- | --- | --- | --- | --- | --- | --- | --- | --- | --- | --- | --- |
|  |  |  |  |  |  |  |  |  |  |  |  |  |  |  |
| 0 | 9 | 17 | 45.28 | 9.77 | 5.12 |  |  |  |  |  |  |  |  |  |
| 2 | 9 | 17 | 42.46 | 6.47 | 6.88 |  |  |  |  |  |  |  |  |  |
| 6 | 9 | 17 | 47.15 | 10.01 | 5.48 |  |  |  |  |  |  |  |  |  |
| 1 | 10 | 17 | 44.36 | 8.29 | 6.87 |  |  |  |  |  |  |  |  |  |
| 1 | 1 | 18 | 143.07 | 11.72 | 11.73 |  |  |  |  |  |  |  |  |  |
| 0 | 2 | 18 | 80.13 | 11.72 | 9 |  |  |  |  |  |  |  |  |  |
| 2 | 2 | 18 | 355.73 | 12.59 | 18.6 |  |  |  |  |  |  |  |  |  |
| 1 | 3 | 18 | 53.31 | 7.5 | 7.01 |  |  |  |  |  |  |  |  |  |
| 3 | 3 | 18 | 68.73 | 9.77 | 8.04 |  |  |  |  |  |  |  |  |  |
| 0 | 4 | 18 | 69.59 | 17.96 | 7.6 |  |  |  |  |  |  |  |  |  |
| 2 | 4 | 18 | 66.75 | 7.5 | 7.5 |  |  |  |  |  |  |  |  |  |
| 4 | 4 | 18 | 57.4 | 10.61 | 6.91 |  |  |  |  |  |  |  |  |  |
| 1 | 5 | 18 | 52.21 | 7.32 | 6.98 |  |  |  |  |  |  |  |  |  |
| 3 | 5 | 18 | 56.13 | 7.98 | 6.74 |  |  |  |  |  |  |  |  |  |
| 5 | 5 | 18 | 76.68 | 10.61 | 7.89 |  |  |  |  |  |  |  |  |  |
| 2 | 6 | 18 | 364.01 | 9.82 | 18.41 |  |  |  |  |  |  |  |  |  |
| 4 | 6 | 18 | 47.97 | 7.19 | 6.92 |  |  |  |  |  |  |  |  |  |
| 6 | 6 | 18 | 188.05 | 16.52 | 12.28 |  |  |  |  |  |  |  |  |  |
| 1 | 7 | 18 | 41.93 | 7.32 | 6.49 |  |  |  |  |  |  |  |  |  |
| 0 | 8 | 18 | 79.75 | 11.72 | 8.25 |  |  |  |  |  |  |  |  |  |
| 0 | 10 | 18 | 57.68 | 12.43 | 6.47 |  |  |  |  |  |  |  |  |  |
| 2 | 10 | 18 | 156.81 | 14.05 | 10.87 |  |  |  |  |  |  |  |  |  |
| 2 | 3 | 19 | 41.62 | 7.87 | 6.13 |  |  |  |  |  |  |  |  |  |
| 1 | 4 | 19 | 70.69 | 10.02 | 7.82 |  |  |  |  |  |  |  |  |  |
| 3 | 4 | 19 | 67.39 | 7.72 | 7.6 |  |  |  |  |  |  |  |  |  |
| 2 | 5 | 19 | 60.56 | 9.69 | 7.17 |  |  |  |  |  |  |  |  |  |
| 0 | 0 | 20 | 185.87 | 30.39 | 11.17 |  |  |  |  |  |  |  |  |  |
| 0 | 4 | 20 | 124.25 | 22.1 | 10.92 |  |  |  |  |  |  |  |  |  |
| 4 | 4 | 20 | 225.39 | 24.36 | 13.55 |  |  |  |  |  |  |  |  |  |
| 0 | 8 | 20 | 91.17 | 22.1 | 7.78 |  |  |  |  |  |  |  |  |  |
| 4 | 8 | 20 | 159.41 | 47.97 | 7.34 |  |  |  |  |  |  |  |  |  |
|  |  |  |  |  |  |  |  |  |  |  |  |  |  |  |
|  |  |  |  |  |  |  |  |  |  |  |  |  |  |  |
|  |  |  |  |  |  |  |  |  |  |  |  |  |  |  |
|  |  |  |  |  |  |  |  |  |  |  |  |  |  |  |
|  |  |  |  |  |  |  |  |  |  |  |  |  |  |  |
|  |  |  |  |  |  |  |  |  |  |  |  |  |  |  |
|  |  |  |  |  |  |  |  |  |  |  |  |  |  |  |
|  |  |  |  |  |  |  |  |  |  |  |  |  |  |  |
|  |  |  |  |  |  |  |  |  |  |  |  |  |  |  |
|  |  |  |  |  |  |  |  |  |  |  |  |  |  |  |
|  |  |  |  |  |  |  |  |  |  |  |  |  |  |  |
|  |  |  |  |  |  |  |  |  |  |  |  |  |  |  |
|  |  |  |  |  |  |  |  |  |  |  |  |  |  |  |
|  |  |  |  |  |  |  |  |  |  |  |  |  |  |  |
|  |  |  |  |  |  |  |  |  |  |  |  |  |  |  |
|  |  |  |  |  |  |  |  |  |  |  |  |  |  |  |
|  |  |  |  |  |  |  |  |  |  |  |  |  |  |  |

Crystal 9

| h | k | l | Fcal^2 | Fobs^2 | σ(Fobs^2) | |  | h | k | l | Fcal^2 | Fobs^2 | σ(Fobs^2) | |
| --- | --- | --- | --- | --- | --- | --- | --- | --- | --- | --- | --- | --- | --- | --- |
|  |  |  |  |  |  |  |  |  |  |  |  |  |  |  |
| 0 | 0 | 2 | 68030.84 | 2392.31 | 236.52 |  |  | 3 | 4 | 7 | 2443.43 | 11.9 | 48.01 |  |
| 1 | 1 | 2 | 64295.22 | 520.14 | 222.92 |  |  | 0 | 5 | 7 | 1988.53 | 14.34 | 44.75 |  |
| 0 | 2 | 2 | 19100.5 | 169.29 | 127.48 |  |  | 2 | 5 | 7 | 1425.94 | 8.06 | 37.09 |  |
| 0 | 1 | 3 | 14913.13 | 89.95 | 112.3 |  |  | 4 | 5 | 7 | 3946.82 | 18.11 | 63.47 |  |
| 1 | 2 | 3 | 2583.36 | 18.56 | 47.73 |  |  | 1 | 6 | 7 | 2562.93 | 14.91 | 51.57 |  |
| 0 | 3 | 3 | 4000.34 | 40.55 | 55.47 |  |  | 3 | 6 | 7 | 4157.29 | 18.62 | 65.41 |  |
| 2 | 3 | 3 | 28328.12 | 292.75 | 161.25 |  |  | 5 | 6 | 7 | 2302.06 | 13.25 | 48.63 |  |
| 0 | 0 | 4 | 11.96 | 7.1 | 3.68 |  |  | 0 | 7 | 7 | 4162.76 | 43.59 | 67.54 |  |
| 1 | 1 | 4 | 12640.41 | 74.84 | 107.05 |  |  | 2 | 7 | 7 | 2358.02 | 17.16 | 46.58 |  |
| 0 | 2 | 4 | 2503.57 | 19.35 | 47.12 |  |  | 4 | 7 | 7 | 3077.8 | 20.75 | 55.05 |  |
| 1 | 3 | 4 | 25520.87 | 155.07 | 151.46 |  |  | 6 | 7 | 7 | 3160.84 | 24.37 | 55.85 |  |
| 3 | 3 | 4 | 28900.21 | 201.36 | 163.53 |  |  | 0 | 0 | 8 | 38878.3 | 450.08 | 191.89 |  |
| 0 | 4 | 4 | 72837.06 | 2506.85 | 258.49 |  |  | 1 | 1 | 8 | 782.13 | 8.6 | 28.01 |  |
| 2 | 4 | 4 | 23282.01 | 295.91 | 144.28 |  |  | 0 | 2 | 8 | 497.16 | 7.17 | 22.7 |  |
| 4 | 4 | 4 | 86562.2 | 3017.75 | 293.83 |  |  | 2 | 2 | 8 | 6872.39 | 39.78 | 80.02 |  |
| 0 | 1 | 5 | 1538.48 | 23.14 | 35.9 |  |  | 1 | 3 | 8 | 3884.92 | 17.48 | 60.12 |  |
| 1 | 2 | 5 | 2761.73 | 14.53 | 49.63 |  |  | 3 | 3 | 8 | 1799.34 | 13.56 | 40.22 |  |
| 0 | 3 | 5 | 814.96 | 8.6 | 29.24 |  |  | 0 | 4 | 8 | 21906.95 | 160.1 | 151.27 |  |
| 2 | 3 | 5 | 13581.61 | 59.28 | 111.27 |  |  | 2 | 4 | 8 | 5378.96 | 22.62 | 71.49 |  |
| 1 | 4 | 5 | 6216.34 | 28.88 | 76.95 |  |  | 4 | 4 | 8 | 14211.92 | 100.31 | 121.52 |  |
| 3 | 4 | 5 | 3631.2 | 18.34 | 58.01 |  |  | 1 | 5 | 8 | 5921.96 | 24.54 | 78.27 |  |
| 0 | 5 | 5 | 10053.25 | 87.18 | 94.75 |  |  | 3 | 5 | 8 | 1625.56 | 8.86 | 41.16 |  |
| 2 | 5 | 5 | 322.94 | 5.34 | 19.22 |  |  | 5 | 5 | 8 | 1080.27 | 11.09 | 30.92 |  |
| 4 | 5 | 5 | 10519.44 | 66.65 | 100.76 |  |  | 0 | 6 | 8 | 6173.87 | 34.41 | 78.34 |  |
| 0 | 0 | 6 | 1139.86 | 21.29 | 35.35 |  |  | 2 | 6 | 8 | 800.45 | 6.08 | 29.79 |  |
| 1 | 1 | 6 | 4551.97 | 30.11 | 62.26 |  |  | 4 | 6 | 8 | 694.8 | 6.55 | 27.42 |  |
| 0 | 2 | 6 | 5025.72 | 37 | 68.19 |  |  | 6 | 6 | 8 | 1445.76 | 15.05 | 39.06 |  |
| 2 | 2 | 6 | 37383.02 | 268.55 | 187.2 |  |  | 1 | 7 | 8 | 2548.7 | 14 | 48.62 |  |
| 1 | 3 | 6 | 2372.74 | 12.41 | 50.04 |  |  | 3 | 7 | 8 | 3650.62 | 16.21 | 59.08 |  |
| 3 | 3 | 6 | 6257.46 | 38.94 | 76.22 |  |  | 5 | 7 | 8 | 2731.73 | 18.49 | 51.59 |  |
| 0 | 4 | 6 | 2665.56 | 23.31 | 49.89 |  |  | 7 | 7 | 8 | 2024.58 | 20.42 | 45.04 |  |
| 2 | 4 | 6 | 5044.57 | 22.33 | 69.44 |  |  | 0 | 8 | 8 | 18263.56 | 262.55 | 134.55 |  |
| 4 | 4 | 6 | 3947.22 | 25.8 | 63.59 |  |  | 2 | 8 | 8 | 3364.36 | 22.08 | 57.31 |  |
| 1 | 5 | 6 | 7724.52 | 36.76 | 84.51 |  |  | 4 | 8 | 8 | 12205.46 | 107.26 | 112.23 |  |
| 3 | 5 | 6 | 7462.14 | 30.24 | 83.34 |  |  | 6 | 8 | 8 | 2260.38 | 21.5 | 47.9 |  |
| 5 | 5 | 6 | 8985.01 | 56.26 | 93.68 |  |  | 8 | 8 | 8 | 5296.44 | 84 | 74.04 |  |
| 0 | 6 | 6 | 5794.79 | 50.68 | 72.92 |  |  | 0 | 1 | 9 | 6939.38 | 40.14 | 80.66 |  |
| 2 | 6 | 6 | 23375.05 | 221.25 | 156.1 |  |  | 1 | 2 | 9 | 5102.57 | 21.15 | 69.89 |  |
| 4 | 6 | 6 | 7372.88 | 46.95 | 83.57 |  |  | 0 | 3 | 9 | 1806.49 | 13.62 | 44.07 |  |
| 6 | 6 | 6 | 35598.68 | 1190.07 | 187.69 |  |  | 2 | 3 | 9 | 1289.4 | 7.84 | 35.47 |  |
| 0 | 1 | 7 | 5063.37 | 32.26 | 68.41 |  |  | 1 | 4 | 9 | 1222.56 | 7.34 | 35.94 |  |
| 1 | 2 | 7 | 5441.17 | 23.44 | 72.1 |  |  | 3 | 4 | 9 | 3527.91 | 15.33 | 60.11 |  |
| 0 | 3 | 7 | 1339.21 | 11.66 | 39.81 |  |  | 0 | 5 | 9 | 1078.68 | 12.16 | 30.76 |  |
| 2 | 3 | 7 | 3635.86 | 16.73 | 56.55 |  |  | 2 | 5 | 9 | 2646.71 | 12.41 | 54.7 |  |
| 1 | 4 | 7 | 4369.69 | 19.07 | 64.2 |  |  | 4 | 5 | 9 | 1415.25 | 9.21 | 36.96 |  |

| h | k | l | Fcal^2 | Fobs^2 | (Fobs^2) | |  | h | k | l | Fcal^2 | Fobs^2 | (Fobs^2) | |
| --- | --- | --- | --- | --- | --- | --- | --- | --- | --- | --- | --- | --- | --- | --- |
|  |  |  |  |  |  |  |  |  |  |  |  |  |  |  |
| 1 | 6 | 9 | 1846.8 | 10.29 | 42.15 |  |  | 4 | 10 | 10 | 711.43 | 12.53 | 27.57 |  |
| 3 | 6 | 9 | 1308.62 | 8.35 | 36.09 |  |  | 6 | 10 | 10 | 3692.19 | 36.47 | 60.7 |  |
| 5 | 6 | 9 | 456.53 | 7.82 | 22.29 |  |  | 8 | 10 | 10 | 301.34 | 14.28 | 17.51 |  |
| 0 | 7 | 9 | 2863.64 | 19.35 | 52.87 |  |  | 10 | 10 | 10 | 1916.2 | 58.59 | 41.16 |  |
| 2 | 7 | 9 | 3112.75 | 14.57 | 55.78 |  |  | 0 | 1 | 11 | 3088.14 | 19.7 | 55.38 |  |
| 4 | 7 | 9 | 525.53 | 8.08 | 23.1 |  |  | 1 | 2 | 11 | 2305.75 | 11.52 | 48.27 |  |
| 6 | 7 | 9 | 952.71 | 10.12 | 30.98 |  |  | 0 | 3 | 11 | 2508.94 | 17.55 | 51.54 |  |
| 1 | 8 | 9 | 1223.56 | 11.4 | 36.07 |  |  | 2 | 3 | 11 | 763.16 | 11.32 | 27.15 |  |
| 3 | 8 | 9 | 1105.87 | 8.35 | 34.79 |  |  | 1 | 4 | 11 | 137.01 | 6.56 | 11.14 |  |
| 5 | 8 | 9 | 1438.02 | 17.41 | 39.76 |  |  | 3 | 4 | 11 | 2174.5 | 11.52 | 47.47 |  |
| 7 | 8 | 9 | 526.79 | 9.37 | 24.08 |  |  | 0 | 5 | 11 | 1431.54 | 14.19 | 37.11 |  |
| 0 | 9 | 9 | 2015.54 | 24.33 | 42.39 |  |  | 2 | 5 | 11 | 1965.06 | 11.15 | 45.06 |  |
| 2 | 9 | 9 | 1396.9 | 13.96 | 39.56 |  |  | 4 | 5 | 11 | 1211.92 | 11.85 | 34.66 |  |
| 4 | 9 | 9 | 295.93 | 8.94 | 16.39 |  |  | 1 | 6 | 11 | 1245.45 | 8.62 | 36.81 |  |
| 6 | 9 | 9 | 1175.17 | 17.2 | 35.31 |  |  | 3 | 6 | 11 | 1466.35 | 9.87 | 38 |  |
| 8 | 9 | 9 | 335.35 | 14.68 | 18.48 |  |  | 5 | 6 | 11 | 377.39 | 6.05 | 20.33 |  |
| 0 | 0 | 10 | 21960.25 | 334.52 | 145.12 |  |  | 0 | 7 | 11 | 961.29 | 11.81 | 34.23 |  |
| 1 | 1 | 10 | 469.65 | 7.79 | 20.46 |  |  | 2 | 7 | 11 | 824.92 | 7.97 | 27.4 |  |
| 0 | 2 | 10 | 544.39 | 7.88 | 22.67 |  |  | 4 | 7 | 11 | 1732.37 | 13.75 | 43.41 |  |
| 2 | 2 | 10 | 16386.29 | 91.91 | 128.34 |  |  | 6 | 7 | 11 | 76.78 | 7.1 | 9.88 |  |
| 1 | 3 | 10 | 2145.98 | 14.02 | 46.69 |  |  | 1 | 8 | 11 | 1094.9 | 8.99 | 32.2 |  |
| 3 | 3 | 10 | 6402.81 | 46.57 | 79.79 |  |  | 3 | 8 | 11 | 27.39 | 5.69 | 3.81 |  |
| 0 | 4 | 10 | 26.27 | 6.59 | 5.75 |  |  | 5 | 8 | 11 | 15.99 | 5.81 | 3.6 |  |
| 2 | 4 | 10 | 3505.9 | 15.45 | 58.76 |  |  | 7 | 8 | 11 | 80.63 | 8.48 | 9.04 |  |
| 4 | 4 | 10 | 3115.64 | 20.07 | 56.89 |  |  | 0 | 9 | 11 | 462.27 | 9.96 | 22.63 |  |
| 1 | 5 | 10 | 2042.18 | 10.64 | 44.06 |  |  | 2 | 9 | 11 | 419.63 | 7.21 | 20.8 |  |
| 3 | 5 | 10 | 1249.26 | 8.35 | 34.39 |  |  | 4 | 9 | 11 | 408.42 | 8.94 | 21.18 |  |
| 5 | 5 | 10 | 414.29 | 7.88 | 19.65 |  |  | 6 | 9 | 11 | 291.05 | 10.88 | 18.42 |  |
| 0 | 6 | 10 | 1376.65 | 12.9 | 38.22 |  |  | 8 | 9 | 11 | 538.77 | 11.86 | 22.57 |  |
| 2 | 6 | 10 | 13855.57 | 83.43 | 118.63 |  |  | 1 | 10 | 11 | 79.82 | 7.53 | 10.64 |  |
| 4 | 6 | 10 | 687.52 | 6.83 | 26.25 |  |  | 3 | 10 | 11 | 249.55 | 6.45 | 16.88 |  |
| 6 | 6 | 10 | 3635.03 | 30.08 | 61.39 |  |  | 5 | 10 | 11 | 149.89 | 9.37 | 14.12 |  |
| 1 | 7 | 10 | 1711.61 | 10.88 | 42.44 |  |  | 7 | 10 | 11 | 307.01 | 10.38 | 17.3 |  |
| 3 | 7 | 10 | 629.11 | 7.44 | 27.25 |  |  | 9 | 10 | 11 | 234.42 | 11.52 | 14.64 |  |
| 5 | 7 | 10 | 975.12 | 11.52 | 32.85 |  |  | 0 | 11 | 11 | 7.72 | 13.18 | 2.17 |  |
| 7 | 7 | 10 | 384.99 | 12.9 | 20.17 |  |  | 2 | 11 | 11 | 500.96 | 11.47 | 20.24 |  |
| 0 | 8 | 10 | 1507 | 14.28 | 39.63 |  |  | 4 | 11 | 11 | 13.75 | 9.32 | 4.49 |  |
| 2 | 8 | 10 | 1638.13 | 10.63 | 41.59 |  |  | 6 | 11 | 11 | 645.57 | 16.49 | 24.94 |  |
| 4 | 8 | 10 | 228.21 | 7.38 | 15.79 |  |  | 8 | 11 | 11 | 559.96 | 16.83 | 23.33 |  |
| 6 | 8 | 10 | 747.9 | 10.49 | 27.58 |  |  | 10 | 11 | 11 | 89.96 | 15.72 | 9.78 |  |
| 8 | 8 | 10 | 524.09 | 13.96 | 23.14 |  |  | 0 | 0 | 12 | 11087.8 | 161.18 | 105.38 |  |
| 1 | 9 | 10 | 807.85 | 8.23 | 27.6 |  |  | 1 | 1 | 12 | 1174.68 | 12.19 | 34.97 |  |
| 3 | 9 | 10 | 582.33 | 7.21 | 24.05 |  |  | 0 | 2 | 12 | 1931.45 | 26.36 | 44.39 |  |
| 5 | 9 | 10 | 695.94 | 11.88 | 26.91 |  |  | 2 | 2 | 12 | 1409.29 | 13.25 | 37.7 |  |
| 7 | 9 | 10 | 336.71 | 9.37 | 18.45 |  |  | 1 | 3 | 12 | 1069.55 | 8.11 | 32.39 |  |
| 9 | 9 | 10 | 278.56 | 13.25 | 16.38 |  |  | 3 | 3 | 12 | 749.98 | 11.09 | 27 |  |
| 0 | 10 | 10 | 172.21 | 13.18 | 13.8 |  |  | 0 | 4 | 12 | 7810.45 | 46.95 | 88.57 |  |
| 2 | 10 | 10 | 3588.76 | 32.6 | 60.66 |  |  | 2 | 4 | 12 | 467.48 | 6.71 | 21.62 |  |

| h | k | l | Fcal^2 | Fobs^2 | (Fobs^2) | |  | h | k | l | Fcal^2 | Fobs^2 | (Fobs^2) | |
| --- | --- | --- | --- | --- | --- | --- | --- | --- | --- | --- | --- | --- | --- | --- |
|  |  |  |  |  |  |  |  |  |  |  |  |  |  |  |
| 4 | 4 | 12 | 10074.39 | 73.34 | 100.41 |  |  | 2 | 5 | 13 | 2010.93 | 16.45 | 46.55 |  |
| 1 | 5 | 12 | 1323.41 | 9.61 | 38.63 |  |  | 4 | 5 | 13 | 657.93 | 8.09 | 25.76 |  |
| 3 | 5 | 12 | 1160.03 | 9.24 | 34.32 |  |  | 1 | 6 | 13 | 598.27 | 7.97 | 24.44 |  |
| 5 | 5 | 12 | 1010.66 | 13.56 | 32.9 |  |  | 3 | 6 | 13 | 282.1 | 7.06 | 16.09 |  |
| 0 | 6 | 12 | 202.81 | 9.32 | 15 |  |  | 5 | 6 | 13 | 30.36 | 5.94 | 5.09 |  |
| 2 | 6 | 12 | 1549.35 | 10.64 | 39.39 |  |  | 0 | 7 | 13 | 483.27 | 10.68 | 23.51 |  |
| 4 | 6 | 12 | 1775.27 | 11.78 | 43.2 |  |  | 2 | 7 | 13 | 824.12 | 8.86 | 28.99 |  |
| 6 | 6 | 12 | 25.43 | 8.6 | 5.56 |  |  | 4 | 7 | 13 | 276.34 | 6.71 | 17.1 |  |
| 1 | 7 | 12 | 107.14 | 6.08 | 9.59 |  |  | 6 | 7 | 13 | 202.69 | 6.96 | 15.63 |  |
| 3 | 7 | 12 | 732.87 | 8.09 | 26.64 |  |  | 1 | 8 | 13 | 531.11 | 8.88 | 24.1 |  |
| 5 | 7 | 12 | 373.24 | 10.61 | 20.36 |  |  | 3 | 8 | 13 | 7.5 | 9.66 | 4.94 |  |
| 7 | 7 | 12 | 313.4 | 11.09 | 18.67 |  |  | 5 | 8 | 13 | 14.44 | 5.98 | 3.98 |  |
| 0 | 8 | 12 | 3252.95 | 26.49 | 58.52 |  |  | 7 | 8 | 13 | 255.85 | 18.1 | 17.56 |  |
| 2 | 8 | 12 | 257.65 | 6.71 | 16.36 |  |  | 0 | 9 | 13 | 514.48 | 11.81 | 21.46 |  |
| 4 | 8 | 12 | 2079.83 | 20.69 | 46.26 |  |  | 2 | 9 | 13 | 46.04 | 6.56 | 6.36 |  |
| 6 | 8 | 12 | 45.34 | 5.84 | 7.39 |  |  | 4 | 9 | 13 | 325.56 | 7.31 | 18.4 |  |
| 8 | 8 | 12 | 2188.39 | 25.77 | 44.6 |  |  | 6 | 9 | 13 | 405.48 | 23.96 | 21.59 |  |
| 1 | 9 | 12 | 187.93 | 6.71 | 14.51 |  |  | 8 | 9 | 13 | 242.9 | 11.13 | 14.19 |  |
| 3 | 9 | 12 | 607.29 | 7.84 | 25.34 |  |  | 1 | 10 | 13 | 223.94 | 8.06 | 14.89 |  |
| 5 | 9 | 12 | 298.11 | 7.58 | 17.89 |  |  | 3 | 10 | 13 | 441.69 | 10.14 | 21.26 |  |
| 7 | 9 | 12 | 361.48 | 15.92 | 18.79 |  |  | 5 | 10 | 13 | 303.59 | 8.94 | 18.22 |  |
| 9 | 9 | 12 | 228.7 | 16.49 | 15.12 |  |  | 7 | 10 | 13 | 71.18 | 10.14 | 8.13 |  |
| 0 | 10 | 12 | 103.77 | 9.96 | 10.56 |  |  | 9 | 10 | 13 | 53.19 | 11.13 | 6.97 |  |
| 2 | 10 | 12 | 55.58 | 6.45 | 8.03 |  |  | 0 | 11 | 13 | 1.17 | 10.68 | 1.05 |  |
| 4 | 10 | 12 | 348.88 | 7.69 | 18.79 |  |  | 2 | 11 | 13 | 170.48 | 7.84 | 12.61 |  |
| 6 | 10 | 12 | 457.79 | 10.89 | 20.75 |  |  | 4 | 11 | 13 | 368.36 | 9.06 | 19.46 |  |
| 8 | 10 | 12 | 299.79 | 12.52 | 16.99 |  |  | 6 | 11 | 13 | 165.73 | 22.21 | 13.44 |  |
| 10 | 10 | 12 | 222.7 | 16.83 | 14.47 |  |  | 8 | 11 | 13 | 33.06 | 11.25 | 5.3 |  |
| 1 | 11 | 12 | 507.04 | 10.32 | 22.16 |  |  | 10 | 11 | 13 | 96.32 | 14.01 | 9.15 |  |
| 3 | 11 | 12 | 565.55 | 8.35 | 23.85 |  |  | 1 | 12 | 13 | 136.67 | 8.55 | 12.5 |  |
| 5 | 11 | 12 | 296.17 | 10.72 | 17.45 |  |  | 3 | 12 | 13 | 115.09 | 7.84 | 12.24 |  |
| 7 | 11 | 12 | 129.63 | 11 | 10.89 |  |  | 5 | 12 | 13 | 100.01 | 12.04 | 10.92 |  |
| 9 | 11 | 12 | 67.56 | 14.35 | 7.67 |  |  | 7 | 12 | 13 | 163.69 | 11.89 | 12.18 |  |
| 11 | 11 | 12 | 80.83 | 19.92 | 7.87 |  |  | 9 | 12 | 13 | 130.4 | 12.6 | 10.2 |  |
| 0 | 12 | 12 | 1282.29 | 26.36 | 35.81 |  |  | 11 | 12 | 13 | 63.65 | 15.42 | 6.89 |  |
| 2 | 12 | 12 | 550.37 | 12.84 | 24.9 |  |  | 0 | 13 | 13 | 116.75 | 19.26 | 9.31 |  |
| 4 | 12 | 12 | 2012.8 | 26.82 | 44.74 |  |  | 2 | 13 | 13 | 39.3 | 11.81 | 7.68 |  |
| 6 | 12 | 12 | 50.63 | 14.68 | 7.58 |  |  | 4 | 13 | 13 | 95.01 | 12.19 | 7.87 |  |
| 8 | 12 | 12 | 894.53 | 20.42 | 27.74 |  |  | 6 | 13 | 13 | 185.49 | 17.2 | 13.86 |  |
| 10 | 12 | 12 | 90.67 | 16.44 | 8.55 |  |  | 8 | 13 | 13 | 26.13 | 17.55 | 5.17 |  |
| 12 | 12 | 12 | 550.74 | 46 | 20.76 |  |  | 10 | 13 | 13 | 73.57 | 22.08 | 6.23 |  |
| 0 | 1 | 13 | 458.19 | 12.67 | 21.62 |  |  | 12 | 13 | 13 | 69.47 | 27.98 | 5.14 |  |
| 1 | 2 | 13 | 314.95 | 6.59 | 18.37 |  |  | 0 | 0 | 14 | 320.06 | 21.29 | 17.2 |  |
| 0 | 3 | 13 | 501.83 | 10.04 | 23.73 |  |  | 1 | 1 | 14 | 1602.07 | 16.12 | 39.29 |  |
| 2 | 3 | 13 | 1081.66 | 10.33 | 32.87 |  |  | 0 | 2 | 14 | 915.79 | 28.38 | 29.95 |  |
| 1 | 4 | 13 | 1443.71 | 10.26 | 37.76 |  |  | 2 | 2 | 14 | 4946.38 | 39.06 | 70.93 |  |
| 3 | 4 | 13 | 897.42 | 9.38 | 31.01 |  |  | 1 | 3 | 14 | 1022.75 | 9.37 | 32.44 |  |
| 0 | 5 | 13 | 15.18 | 8.62 | 3.16 |  |  | 3 | 3 | 14 | 129.42 | 9.66 | 12.89 |  |

| h | k | l | Fcal^2 | Fobs^2 | (Fobs^2) | |  | h | k | l | Fcal^2 | Fobs^2 | (Fobs^2) | |
| --- | --- | --- | --- | --- | --- | --- | --- | --- | --- | --- | --- | --- | --- | --- |
|  |  |  |  |  |  |  |  |  |  |  |  |  |  |  |
| 0 | 4 | 14 | 914.38 | 12.53 | 30.18 |  |  | 11 | 13 | 14 | 0.25 | 25.16 | 3.73 |  |
| 2 | 4 | 14 | 494.4 | 7.6 | 23.6 |  |  | 0 | 14 | 14 | 11.64 | 19.26 | 2.99 |  |
| 4 | 4 | 14 | 624.43 | 12.19 | 25.91 |  |  | 2 | 14 | 14 | 278.6 | 15.05 | 18.14 |  |
| 1 | 5 | 14 | 63.96 | 6.69 | 7.24 |  |  | 4 | 14 | 14 | 109.14 | 13.39 | 10.05 |  |
| 3 | 5 | 14 | 204.03 | 6.71 | 14.76 |  |  | 6 | 14 | 14 | 510.22 | 23.29 | 20.02 |  |
| 5 | 5 | 14 | 1387.1 | 16.12 | 36.97 |  |  | 8 | 14 | 14 | 0 | 23.81 | 3.71 |  |
| 0 | 6 | 14 | 340.61 | 16.22 | 18.51 |  |  | 10 | 14 | 14 | 108.78 | 59.29 | 11.15 |  |
| 2 | 6 | 14 | 2982.48 | 18.01 | 54.93 |  |  | 12 | 14 | 14 | 0 | 91.23 | 2.11 |  |
| 4 | 6 | 14 | 116.43 | 6.71 | 10.75 |  |  | 0 | 1 | 15 | 90.21 | 9.32 | 9.54 |  |
| 6 | 6 | 14 | 1383.39 | 17.16 | 37.77 |  |  | 1 | 2 | 15 | 247.9 | 7.1 | 16.01 |  |
| 1 | 7 | 14 | 379.05 | 7.97 | 20.6 |  |  | 0 | 3 | 15 | 808.42 | 12.9 | 29.98 |  |
| 3 | 7 | 14 | 109.34 | 6.71 | 9.94 |  |  | 2 | 3 | 15 | 288.55 | 7.1 | 17.3 |  |
| 5 | 7 | 14 | 107.14 | 6.56 | 10.11 |  |  | 1 | 4 | 15 | 320.08 | 7.6 | 17.64 |  |
| 7 | 7 | 14 | 368.31 | 11.68 | 20.43 |  |  | 3 | 4 | 15 | 42.31 | 7.1 | 6.61 |  |
| 0 | 8 | 14 | 347.03 | 10.75 | 18.93 |  |  | 0 | 5 | 15 | 99.96 | 10.04 | 10.01 |  |
| 2 | 8 | 14 | 402.62 | 8.18 | 19.94 |  |  | 2 | 5 | 15 | 233.12 | 7.44 | 15.61 |  |
| 4 | 8 | 14 | 93.02 | 7.4 | 10.1 |  |  | 4 | 5 | 15 | 718.34 | 11.68 | 26.81 |  |
| 6 | 8 | 14 | 194.73 | 7.58 | 14.49 |  |  | 1 | 6 | 15 | 304.56 | 7.72 | 17.94 |  |
| 8 | 8 | 14 | 184.63 | 16.12 | 12.76 |  |  | 3 | 6 | 15 | 480.01 | 8.59 | 22.43 |  |
| 1 | 9 | 14 | 657.06 | 8.86 | 24.75 |  |  | 5 | 6 | 15 | 54.73 | 7.07 | 7.88 |  |
| 3 | 9 | 14 | 181.77 | 7.6 | 13.21 |  |  | 0 | 7 | 15 | 268.75 | 11.4 | 16.7 |  |
| 5 | 9 | 14 | 47.72 | 6.77 | 6.68 |  |  | 2 | 7 | 15 | 251.03 | 8.96 | 14.93 |  |
| 7 | 9 | 14 | 190.58 | 28.13 | 14.12 |  |  | 4 | 7 | 15 | 113.52 | 7.43 | 10.87 |  |
| 9 | 9 | 14 | 278.91 | 19.35 | 14.31 |  |  | 6 | 7 | 15 | 210.39 | 14.37 | 15.37 |  |
| 0 | 10 | 14 | 370.45 | 11.81 | 20.07 |  |  | 1 | 8 | 15 | 381.49 | 8.74 | 19.68 |  |
| 2 | 10 | 14 | 1535.38 | 15.89 | 38.8 |  |  | 3 | 8 | 15 | 304.39 | 8.48 | 17.51 |  |
| 4 | 10 | 14 | 94.65 | 11.32 | 10.35 |  |  | 5 | 8 | 15 | 147.95 | 9.08 | 12.74 |  |
| 6 | 10 | 14 | 1167.83 | 17.51 | 32.78 |  |  | 7 | 8 | 15 | 148.86 | 19.48 | 13.58 |  |
| 8 | 10 | 14 | 150.65 | 12.41 | 11.05 |  |  | 0 | 9 | 15 | 375.07 | 12.9 | 17.74 |  |
| 10 | 10 | 14 | 381.63 | 20.75 | 18.96 |  |  | 2 | 9 | 15 | 162.01 | 8.11 | 12.81 |  |
| 1 | 11 | 14 | 60.67 | 7.97 | 7.63 |  |  | 4 | 9 | 15 | 10.7 | 7.13 | 3.48 |  |
| 3 | 11 | 14 | 240.6 | 8.48 | 16.96 |  |  | 6 | 9 | 15 | 158.6 | 11 | 13.31 |  |
| 5 | 11 | 14 | 184.05 | 8.92 | 14.53 |  |  | 8 | 9 | 15 | 141.13 | 11.9 | 10.21 |  |
| 7 | 11 | 14 | 99.59 | 15.87 | 9.45 |  |  | 1 | 10 | 15 | 282.36 | 8.92 | 16.97 |  |
| 9 | 11 | 14 | 21.75 | 12.13 | 4.44 |  |  | 3 | 10 | 15 | 17.58 | 7.95 | 4.15 |  |
| 11 | 11 | 14 | 0 | 19.7 | 2.27 |  |  | 5 | 10 | 15 | 90.63 | 8.85 | 10.11 |  |
| 0 | 12 | 14 | 51.72 | 11.47 | 6.43 |  |  | 7 | 10 | 15 | 88.2 | 12.27 | 8.15 |  |
| 2 | 12 | 14 | 111.86 | 8.35 | 10.08 |  |  | 9 | 10 | 15 | 40.59 | 13.54 | 5.56 |  |
| 4 | 12 | 14 | 90.29 | 8.59 | 9.25 |  |  | 0 | 11 | 15 | 51.01 | 12.53 | 7.76 |  |
| 6 | 12 | 14 | 89.07 | 10.21 | 9.61 |  |  | 2 | 11 | 15 | 100.41 | 8.86 | 9.03 |  |
| 8 | 12 | 14 | 45.27 | 13.16 | 6.6 |  |  | 4 | 11 | 15 | 153.9 | 10.21 | 14.71 |  |
| 10 | 12 | 14 | 40.84 | 14.69 | 3.88 |  |  | 6 | 11 | 15 | 13.56 | 9.04 | 3.42 |  |
| 12 | 12 | 14 | 47.73 | 30.2 | 6.15 |  |  | 8 | 11 | 15 | 29.08 | 12.29 | 4.02 |  |
| 1 | 13 | 14 | 90.02 | 8.71 | 8.89 |  |  | 10 | 11 | 15 | 63.59 | 14.29 | 6.3 |  |
| 3 | 13 | 14 | 63.93 | 7.95 | 8.34 |  |  | 1 | 12 | 15 | 13.7 | 8.86 | 2.63 |  |
| 5 | 13 | 14 | 52.25 | 10.45 | 6.51 |  |  | 3 | 12 | 15 | 87.92 | 10.13 | 9.62 |  |
| 7 | 13 | 14 | 43.76 | 12.9 | 5.79 |  |  | 5 | 12 | 15 | 49.92 | 10.24 | 7.07 |  |
| 9 | 13 | 14 | 25 | 16 | 4.81 |  |  | 7 | 12 | 15 | 22.42 | 12.52 | 4.6 |  |

| h | k | l | Fcal^2 | Fobs^2 | (Fobs^2) | |  | h | k | l | Fcal^2 | Fobs^2 | (Fobs^2) | |
| --- | --- | --- | --- | --- | --- | --- | --- | --- | --- | --- | --- | --- | --- | --- |
|  |  |  |  |  |  |  |  |  |  |  |  |  |  |  |
| 9 | 12 | 15 | 31.44 | 17.49 | 3.9 |  |  | 9 | 9 | 16 | 41.85 | 18.98 | 6.31 |  |
| 11 | 12 | 15 | 5.85 | 30.41 | 3.13 |  |  | 0 | 10 | 16 | 66.97 | 12.19 | 7.61 |  |
| 0 | 13 | 15 | 109.5 | 14.58 | 9.91 |  |  | 2 | 10 | 16 | 121.71 | 8.86 | 10.36 |  |
| 2 | 13 | 15 | 32.38 | 9.36 | 6.13 |  |  | 4 | 10 | 16 | 79.31 | 8.21 | 9.62 |  |
| 4 | 13 | 15 | 22.14 | 11.29 | 4.59 |  |  | 6 | 10 | 16 | 12.38 | 10.2 | 1.25 |  |
| 6 | 13 | 15 | 54.55 | 12.95 | 7.13 |  |  | 8 | 10 | 16 | 82.93 | 12.11 | 8.29 |  |
| 8 | 13 | 15 | 51.37 | 17.46 | 6.57 |  |  | 10 | 10 | 16 | 74.72 | 19.7 | 7.09 |  |
| 10 | 13 | 15 | 3.76 | 28.38 | 2.59 |  |  | 1 | 11 | 16 | 134.17 | 9.48 | 10.58 |  |
| 12 | 13 | 15 | 44.73 | 58.28 | 3.69 |  |  | 3 | 11 | 16 | 19.03 | 8.71 | 0.68 |  |
| 1 | 14 | 15 | 0 | 10.71 | 3.42 |  |  | 5 | 11 | 16 | 40.9 | 11.1 | 6.2 |  |
| 3 | 14 | 15 | 32.98 | 10.71 | 5.48 |  |  | 7 | 11 | 16 | 100.98 | 14.88 | 8.38 |  |
| 5 | 14 | 15 | 60.37 | 13.68 | 7.61 |  |  | 9 | 11 | 16 | 10.85 | 19.03 | 4.59 |  |
| 7 | 14 | 15 | 40.46 | 18.03 | 5.78 |  |  | 11 | 11 | 16 | 0 | 77.93 | 2.59 |  |
| 9 | 14 | 15 | 27.82 | 43.82 | 3.62 |  |  | 0 | 12 | 16 | 198.35 | 13.96 | 14.22 |  |
| 0 | 15 | 15 | 0 | 25.34 | 3.83 |  |  | 2 | 12 | 16 | 0.46 | 9.57 | 2.82 |  |
| 2 | 15 | 15 | 57.29 | 25.8 | 5.13 |  |  | 4 | 12 | 16 | 514.03 | 28.24 | 20.83 |  |
| 4 | 15 | 15 | 33.32 | 25.8 | 4.46 |  |  | 6 | 12 | 16 | 111.8 | 15.76 | 9.87 |  |
| 6 | 15 | 15 | 40.64 | 71.25 | 4.34 |  |  | 8 | 12 | 16 | 193.24 | 24.36 | 12.9 |  |
| 8 | 15 | 15 | 38.33 | 34 | 4.74 |  |  | 10 | 12 | 16 | 0 | 29.19 | 0.74 |  |
| 0 | 0 | 16 | 2134.76 | 42.57 | 46.43 |  |  | 1 | 13 | 16 | 16.38 | 10.04 | 3.59 |  |
| 1 | 1 | 16 | 935.3 | 14.34 | 31.54 |  |  | 3 | 13 | 16 | 21.74 | 11.14 | 5.09 |  |
| 0 | 2 | 16 | 521.32 | 12.53 | 23.45 |  |  | 5 | 13 | 16 | 96.01 | 15.51 | 9.3 |  |
| 2 | 2 | 16 | 97.16 | 10.37 | 10.36 |  |  | 7 | 13 | 16 | 42.01 | 16.17 | 5.75 |  |
| 1 | 3 | 16 | 129.31 | 8.79 | 11.74 |  |  | 9 | 13 | 16 | 0 | 23.25 | 1.17 |  |
| 3 | 3 | 16 | 457.2 | 12.53 | 21.58 |  |  | 11 | 13 | 16 | 0 | 64.88 | 0.25 |  |
| 0 | 4 | 16 | 1665.29 | 19.35 | 41.29 |  |  | 0 | 14 | 16 | 29.56 | 31.93 | 6.6 |  |
| 2 | 4 | 16 | 135.28 | 7.74 | 11.56 |  |  | 2 | 14 | 16 | 28.41 | 14.69 | 3.94 |  |
| 4 | 4 | 16 | 1257.05 | 17.46 | 35.13 |  |  | 4 | 14 | 16 | 36.85 | 24.31 | 4.98 |  |
| 1 | 5 | 16 | 138.17 | 7.72 | 12.45 |  |  | 6 | 14 | 16 | 52.28 | 34.71 | 4.44 |  |
| 3 | 5 | 16 | 114.77 | 7.97 | 10.78 |  |  | 8 | 14 | 16 | 0 | 39.36 | 3.19 |  |
| 5 | 5 | 16 | 123.64 | 11.81 | 10.44 |  |  | 1 | 15 | 16 | 0 | 81.1 | 4.22 |  |
| 0 | 6 | 16 | 183.41 | 11.47 | 13.07 |  |  | 2 | 16 | 16 | 0 | 79.07 | 2.53 |  |
| 2 | 6 | 16 | 229.13 | 8.34 | 15.17 |  |  | 0 | 1 | 17 | 36.63 | 10.75 | 6.33 |  |
| 4 | 6 | 16 | 18 | 7.6 | 4.31 |  |  | 1 | 2 | 17 | 214.33 | 8.47 | 14.78 |  |
| 6 | 6 | 16 | 246.29 | 12.19 | 17.23 |  |  | 0 | 3 | 17 | 255.09 | 12.19 | 16.35 |  |
| 1 | 7 | 16 | 238.28 | 9.38 | 14.63 |  |  | 2 | 3 | 17 | 74.06 | 8.2 | 8.89 |  |
| 3 | 7 | 16 | 185.49 | 8.48 | 13.33 |  |  | 1 | 4 | 17 | 40.12 | 8.2 | 6.9 |  |
| 5 | 7 | 16 | 59.48 | 7.84 | 7.23 |  |  | 3 | 4 | 17 | 45.38 | 8.2 | 6.34 |  |
| 7 | 7 | 16 | 65.22 | 12.19 | 7.76 |  |  | 0 | 5 | 17 | 425.06 | 16.73 | 20.13 |  |
| 0 | 8 | 16 | 2562.95 | 26.53 | 48.92 |  |  | 2 | 5 | 17 | 66.54 | 7.97 | 8.68 |  |
| 2 | 8 | 16 | 282.37 | 9.1 | 17.39 |  |  | 4 | 5 | 17 | 217.46 | 9.04 | 14.22 |  |
| 4 | 8 | 16 | 579.35 | 10.58 | 23.62 |  |  | 1 | 6 | 17 | 259.57 | 9.24 | 16 |  |
| 6 | 8 | 16 | 77.2 | 8.73 | 8.77 |  |  | 3 | 6 | 17 | 276.1 | 9.12 | 16.28 |  |
| 8 | 8 | 16 | 974.38 | 22.57 | 28.74 |  |  | 5 | 6 | 17 | 66.83 | 8.48 | 7.63 |  |
| 1 | 9 | 16 | 219.09 | 9.68 | 15.11 |  |  | 0 | 7 | 17 | 265.67 | 15.21 | 16.33 |  |
| 3 | 9 | 16 | 75.2 | 8.94 | 9.33 |  |  | 2 | 7 | 17 | 116.84 | 8.94 | 9.86 |  |
| 5 | 9 | 16 | 188.49 | 13.79 | 15.18 |  |  | 4 | 7 | 17 | 17.26 | 8.35 | 4.49 |  |
| 7 | 9 | 16 | 133.87 | 10.63 | 11.97 |  |  | 6 | 7 | 17 | 95.27 | 8.99 | 9.69 |  |

| h | k | l | Fcal^2 | Fobs^2 | (Fobs^2) | |  | h | k | l | Fcal^2 | Fobs^2 | (Fobs^2) | |
| --- | --- | --- | --- | --- | --- | --- | --- | --- | --- | --- | --- | --- | --- | --- |
|  |  |  |  |  |  |  |  |  |  |  |  |  |  |  |
| 1 | 8 | 17 | 218.82 | 17.17 | 14.64 |  |  | 4 | 6 | 18 | 138.38 | 10.82 | 10.81 |  |
| 3 | 8 | 17 | 128.96 | 8.99 | 11.54 |  |  | 6 | 6 | 18 | 373.03 | 16.44 | 19.26 |  |
| 5 | 8 | 17 | 88.46 | 11.04 | 8.96 |  |  | 1 | 7 | 18 | 101.28 | 10.58 | 9.85 |  |
| 7 | 8 | 17 | 53.2 | 11.75 | 7.26 |  |  | 3 | 7 | 18 | 23.72 | 8.97 | 4.99 |  |
| 0 | 9 | 17 | 86.06 | 12.9 | 8.01 |  |  | 5 | 7 | 18 | 43.01 | 9.79 | 6.95 |  |
| 2 | 9 | 17 | 102.52 | 9.22 | 10.43 |  |  | 7 | 7 | 18 | 27.31 | 16.74 | 7.59 |  |
| 4 | 9 | 17 | 18.5 | 8.82 | 4.59 |  |  | 0 | 8 | 18 | 176.43 | 14.68 | 12.88 |  |
| 6 | 9 | 17 | 50.02 | 10.85 | 8.57 |  |  | 2 | 8 | 18 | 69.49 | 10.14 | 6.47 |  |
| 8 | 9 | 17 | 48.12 | 13.16 | 6.57 |  |  | 4 | 8 | 18 | 43.23 | 10.53 | 5.16 |  |
| 1 | 10 | 17 | 134.23 | 10.12 | 10.95 |  |  | 6 | 8 | 18 | 47.76 | 11.24 | 6.95 |  |
| 3 | 10 | 17 | 7.93 | 9.99 | 2.02 |  |  | 8 | 8 | 18 | 15.26 | 22.89 | 4.51 |  |
| 5 | 10 | 17 | 25.55 | 11.1 | 4.39 |  |  | 1 | 9 | 18 | 58.97 | 10.08 | 7.04 |  |
| 7 | 10 | 17 | 40.44 | 12.85 | 5.14 |  |  | 3 | 9 | 18 | 24.98 | 10.85 | 5.48 |  |
| 9 | 10 | 17 | 46.8 | 16.81 | 4.71 |  |  | 5 | 9 | 18 | 40.04 | 12.94 | 4.68 |  |
| 0 | 11 | 17 | 25.55 | 15.3 | 3.81 |  |  | 7 | 9 | 18 | 33.31 | 16.16 | 4.94 |  |
| 2 | 11 | 17 | 59.78 | 13.65 | 6.29 |  |  | 9 | 9 | 18 | 51.39 | 39.94 | 4.33 |  |
| 4 | 11 | 17 | 84.16 | 13.41 | 8.37 |  |  | 0 | 10 | 18 | 119.86 | 14.34 | 10.91 |  |
| 6 | 11 | 17 | 4.1 | 13.34 | 2.18 |  |  | 2 | 10 | 18 | 347.42 | 13.13 | 17.51 |  |
| 8 | 11 | 17 | 43.9 | 20.88 | 5.92 |  |  | 4 | 10 | 18 | 26.3 | 15.83 | 4.78 |  |
| 10 | 11 | 17 | 34.4 | 41.93 | 5.26 |  |  | 6 | 10 | 18 | 267.08 | 30.5 | 13.61 |  |
| 1 | 12 | 17 | 9.84 | 10.38 | 3.04 |  |  | 8 | 10 | 18 | 6.9 | 19.87 | 2.68 |  |
| 3 | 12 | 17 | 65.21 | 14.09 | 8.25 |  |  | 10 | 10 | 18 | 129.26 | 38.34 | 11.14 |  |
| 5 | 12 | 17 | 20.31 | 17.23 | 4.33 |  |  | 1 | 11 | 18 | 5.86 | 12.52 | 4.65 |  |
| 7 | 12 | 17 | 41.01 | 24 | 2.97 |  |  | 3 | 11 | 18 | 66.25 | 18.44 | 8.47 |  |
| 9 | 12 | 17 | 0 | 37.74 | 2.63 |  |  | 5 | 11 | 18 | 40.73 | 19.48 | 5.78 |  |
| 0 | 13 | 17 | 27.16 | 24.33 | 3.91 |  |  | 7 | 11 | 18 | 12.47 | 23.13 | 6.16 |  |
| 2 | 13 | 17 | 18.87 | 24.43 | 5.94 |  |  | 9 | 11 | 18 | 23.91 | 26 | 3.08 |  |
| 4 | 13 | 17 | 53.58 | 27.74 | 4.91 |  |  | 0 | 12 | 18 | 0 | 18.02 | 0.55 |  |
| 6 | 13 | 17 | 3.12 | 24.01 | 2.85 |  |  | 2 | 12 | 18 | 50.23 | 35.14 | 5.42 |  |
| 3 | 14 | 17 | 24.14 | 82.11 | 2.24 |  |  | 4 | 12 | 18 | 10.5 | 32.95 | 4.6 |  |
| 5 | 14 | 17 | 73.56 | 74 | 6.03 |  |  | 6 | 12 | 18 | 0 | 32.33 | 3.6 |  |
| 7 | 14 | 17 | 36.72 | 71.3 | 5.15 |  |  | 8 | 12 | 18 | 0 | 35.34 | 3.89 |  |
| 0 | 15 | 17 | 43.37 | 90.22 | 4.83 |  |  | 3 | 13 | 18 | 210.05 | 84.14 | 6.58 |  |
| 2 | 15 | 17 | 0 | 80.08 | 4.87 |  |  | 5 | 13 | 18 | 50.27 | 123.67 | 3.32 |  |
| 0 | 0 | 18 | 13.86 | 22.3 | 5.08 |  |  | 7 | 13 | 18 | 9.63 | 89.2 | 2.16 |  |
| 1 | 1 | 18 | 291.03 | 14.28 | 17.39 |  |  | 3 | 15 | 18 | 19.45 | 87.18 | 2.69 |  |
| 0 | 2 | 18 | 174.04 | 13.25 | 13.22 |  |  | 0 | 1 | 19 | 36.84 | 14.68 | 6.21 |  |
| 2 | 2 | 18 | 723.03 | 16.49 | 26.64 |  |  | 1 | 2 | 19 | 41.92 | 9.98 | 6.26 |  |
| 1 | 3 | 18 | 95.19 | 8.99 | 10.11 |  |  | 0 | 3 | 19 | 0 | 13.25 | 0.67 |  |
| 3 | 3 | 18 | 152.95 | 13.62 | 12.15 |  |  | 2 | 3 | 19 | 95.76 | 10.36 | 9.19 |  |
| 0 | 4 | 18 | 155.24 | 13.68 | 12.57 |  |  | 1 | 4 | 19 | 141.33 | 10.26 | 11.84 |  |
| 2 | 4 | 18 | 122.22 | 10.14 | 10.79 |  |  | 3 | 4 | 19 | 158.56 | 10.51 | 11.89 |  |
| 4 | 4 | 18 | 98.91 | 13.56 | 9.8 |  |  | 0 | 5 | 19 | 54.08 | 13.96 | 7.06 |  |
| 1 | 5 | 18 | 97.44 | 9.1 | 9.83 |  |  | 2 | 5 | 19 | 123.66 | 10.63 | 10.88 |  |
| 3 | 5 | 18 | 119.71 | 9.61 | 10.02 |  |  | 4 | 5 | 19 | 17.65 | 10.38 | 4.4 |  |
| 5 | 5 | 18 | 182.87 | 13.56 | 12.09 |  |  | 1 | 6 | 19 | 28.64 | 10.24 | 4.91 |  |
| 0 | 6 | 18 | 20.73 | 12.53 | 4.1 |  |  | 3 | 6 | 19 | 58.08 | 10.12 | 6.76 |  |
| 2 | 6 | 18 | 833.4 | 11.66 | 27.36 |  |  | 5 | 6 | 19 | 23.08 | 13.44 | 5.24 |  |

| h | k | l | Fcal^2 | Fobs^2 | (Fobs^2) | |  | h | k | l | Fcal^2 | Fobs^2 | (Fobs^2) | |
| --- | --- | --- | --- | --- | --- | --- | --- | --- | --- | --- | --- | --- | --- | --- |
|  |  |  |  |  |  |  |  |  |  |  |  |  |  |  |
| 0 | 7 | 19 | 84.2 | 14.28 | 9.21 |  |  | 2 | 8 | 20 | 7.57 | 14.01 | 3.87 |  |
| 2 | 7 | 19 | 77.48 | 11.61 | 7.83 |  |  | 4 | 8 | 20 | 166.89 | 24.06 | 12.32 |  |
| 4 | 7 | 19 | 28.19 | 11.34 | 4.67 |  |  | 6 | 8 | 20 | 0 | 24.19 | 2.24 |  |
| 6 | 7 | 19 | 30.53 | 21.17 | 4.61 |  |  | 8 | 8 | 20 | 81.11 | 52.12 | 7.93 |  |
| 1 | 8 | 19 | 86.3 | 10.89 | 8.22 |  |  | 1 | 9 | 20 | 4.68 | 21.52 | 3 |  |
| 3 | 8 | 19 | 14.79 | 12.86 | 3.87 |  |  | 3 | 9 | 20 | 35.31 | 26.92 | 4.32 |  |
| 5 | 8 | 19 | 11.17 | 20.32 | 4.6 |  |  | 5 | 9 | 20 | 0 | 31 | 3.21 |  |
| 7 | 8 | 19 | 12.69 | 19.89 | 3.65 |  |  | 7 | 9 | 20 | 0.2 | 27.45 | 1.89 |  |
| 0 | 9 | 19 | 37.99 | 17.55 | 4.66 |  |  | 0 | 10 | 20 | 11.85 | 39.12 | 2.34 |  |
| 2 | 9 | 19 | 6.24 | 11.87 | 3.42 |  |  | 2 | 10 | 20 | 0 | 35.38 | 3.5 |  |
| 4 | 9 | 19 | 71.06 | 19.39 | 6.2 |  |  | 4 | 10 | 20 | 0 | 78.05 | 3.2 |  |
| 6 | 9 | 19 | 44.33 | 23.59 | 4.93 |  |  | 1 | 11 | 20 | 55.74 | 84.14 | 5.23 |  |
| 8 | 9 | 19 | 14.63 | 27.31 | 3.53 |  |  | 3 | 11 | 20 | 74.9 | 119.62 | 3.43 |  |
| 1 | 10 | 19 | 38.5 | 14.92 | 6.41 |  |  | 5 | 11 | 20 | 0 | 84.14 | 3.31 |  |
| 3 | 10 | 19 | 45.8 | 22.02 | 6.13 |  |  | 4 | 12 | 20 | 4.02 | 88.19 | 9.23 |  |
| 5 | 10 | 19 | 41.87 | 31.8 | 4.57 |  |  | 0 | 1 | 21 | 48.97 | 20.92 | 7.01 |  |
| 7 | 10 | 19 | 0 | 54.55 | 2.02 |  |  | 1 | 2 | 21 | 37.92 | 13.68 | 6.32 |  |
| 9 | 10 | 19 | 13.55 | 79.98 | 2.43 |  |  | 0 | 3 | 21 | 19.5 | 20.46 | 4.88 |  |
| 0 | 11 | 19 | 0 | 28.64 | 1.63 |  |  | 2 | 3 | 21 | 23.82 | 16.28 | 4.23 |  |
| 2 | 11 | 19 | 39.3 | 61.66 | 2.75 |  |  | 1 | 4 | 21 | 25.71 | 16.61 | 4.28 |  |
| 4 | 11 | 19 | 29.86 | 41.32 | 5.65 |  |  | 3 | 4 | 21 | 57.97 | 29.88 | 6.5 |  |
| 6 | 11 | 19 | 87.51 | 73.32 | 3.9 |  |  | 0 | 5 | 21 | 14.86 | 28.38 | 2.24 |  |
| 8 | 11 | 19 | 0.11 | 46.62 | 3.67 |  |  | 2 | 5 | 21 | 36.3 | 16.36 | 5.96 |  |
| 5 | 12 | 19 | 0 | 71.61 | 3.32 |  |  | 4 | 5 | 21 | 26.83 | 27.41 | 5.1 |  |
| 4 | 13 | 19 | 80.29 | 85.15 | 3.79 |  |  | 1 | 6 | 21 | 5.85 | 15.91 | 2.86 |  |
| 6 | 13 | 19 | 9.12 | 68.57 | 3.17 |  |  | 3 | 6 | 21 | 37.34 | 20.7 | 5.57 |  |
| 3 | 14 | 19 | 0 | 87.18 | 2.39 |  |  | 5 | 6 | 21 | 17.96 | 19.66 | 3.91 |  |
| 0 | 0 | 20 | 353.22 | 36.49 | 17.74 |  |  | 0 | 7 | 21 | 36.3 | 33.12 | 4.27 |  |
| 1 | 1 | 20 | 22.14 | 15.77 | 3.68 |  |  | 2 | 7 | 21 | 9.74 | 52.38 | 3.56 |  |
| 0 | 2 | 20 | 21.14 | 15.05 | 3.41 |  |  | 4 | 7 | 21 | 40.68 | 21.23 | 6.44 |  |
| 2 | 2 | 20 | 94.34 | 15.4 | 8.88 |  |  | 6 | 7 | 21 | 20.85 | 109.48 | 1.87 |  |
| 1 | 3 | 20 | 65.58 | 10.49 | 7.38 |  |  | 1 | 8 | 21 | 29.21 | 22.71 | 4.03 |  |
| 3 | 3 | 20 | 38.81 | 15.4 | 4.7 |  |  | 3 | 8 | 21 | 0 | 28.69 | 0.91 |  |
| 0 | 4 | 20 | 337.8 | 19.26 | 16.69 |  |  | 0 | 9 | 21 | 25.17 | 80.08 | 3.97 |  |
| 2 | 4 | 20 | 56.4 | 11.32 | 7.38 |  |  | 2 | 9 | 21 | 24.1 | 31.71 | 2.97 |  |
| 4 | 4 | 20 | 560.94 | 22.5 | 22.2 |  |  | 0 | 0 | 22 | 237 | 62.85 | 13.12 |  |
| 1 | 5 | 20 | 28.23 | 11.75 | 5.66 |  |  | 1 | 1 | 22 | 0 | 30.88 | 0.51 |  |
| 3 | 5 | 20 | 99.23 | 12.76 | 8.84 |  |  | 0 | 2 | 22 | 1.86 | 22.19 | 1.75 |  |
| 5 | 5 | 20 | 136.7 | 20.75 | 10.36 |  |  | 2 | 2 | 22 | 193.86 | 108.21 | 12.08 |  |
| 0 | 6 | 20 | 42.92 | 16.44 | 6.01 |  |  | 1 | 3 | 22 | 15.51 | 25.99 | 4.98 |  |
| 2 | 6 | 20 | 43.7 | 11.82 | 6.05 |  |  | 3 | 3 | 22 | 32.52 | 71.97 | 4.97 |  |
| 4 | 6 | 20 | 77.78 | 13.64 | 8.16 |  |  | 0 | 4 | 22 | 35.36 | 37.12 | 0.79 |  |
| 6 | 6 | 20 | 0 | 41.64 | 1.93 |  |  | 2 | 4 | 22 | 31.56 | 32.4 | 4.94 |  |
| 1 | 7 | 20 | 16.87 | 15.84 | 2.55 |  |  | 4 | 4 | 22 | 94.93 | 108.46 | 5.66 |  |
| 3 | 7 | 20 | 67.33 | 15.28 | 6.87 |  |  | 1 | 5 | 22 | 46.47 | 45.87 | 3.69 |  |
| 5 | 7 | 20 | 4.7 | 24.63 | 4.97 |  |  | 3 | 5 | 22 | 31.74 | 32.14 | 3.42 |  |
| 7 | 7 | 20 | 27.56 | 73.61 | 3.87 |  |  | 5 | 5 | 22 | 0 | 94.27 | 3.58 |  |
| 0 | 8 | 20 | 231.47 | 25.26 | 13.33 |  |  | 0 | 6 | 22 | 31.72 | 32.86 | 5.52 |  |

| h | k | l | Fcal^2 | Fobs^2 | (Fobs^2) | |  | h | k | l | Fcal^2 | Fobs^2 | (Fobs^2) | |
| --- | --- | --- | --- | --- | --- | --- | --- | --- | --- | --- | --- | --- | --- | --- |
|  |  |  |  |  |  |  |  |  |  |  |  |  |  |  |
| 2 | 6 | 22 | 126.97 | 67.32 | 10.71 |  |  |  |  |  |  |  |  |  |
| 4 | 6 | 22 | 40.08 | 56.77 | 1.95 |  |  |  |  |  |  |  |  |  |
| 3 | 7 | 22 | 0 | 106.44 | 3.63 |  |  |  |  |  |  |  |  |  |
| 5 | 7 | 22 | 25.2 | 113.53 | 3.21 |  |  |  |  |  |  |  |  |  |
| 3 | 4 | 23 | 41.13 | 82.11 | 2.59 |  |  |  |  |  |  |  |  |  |
|  |  |  |  |  |  |  |  |  |  |  |  |  |  |  |
|  |  |  |  |  |  |  |  |  |  |  |  |  |  |  |
|  |  |  |  |  |  |  |  |  |  |  |  |  |  |  |
|  |  |  |  |  |  |  |  |  |  |  |  |  |  |  |
|  |  |  |  |  |  |  |  |  |  |  |  |  |  |  |
|  |  |  |  |  |  |  |  |  |  |  |  |  |  |  |
|  |  |  |  |  |  |  |  |  |  |  |  |  |  |  |
|  |  |  |  |  |  |  |  |  |  |  |  |  |  |  |
|  |  |  |  |  |  |  |  |  |  |  |  |  |  |  |
|  |  |  |  |  |  |  |  |  |  |  |  |  |  |  |
|  |  |  |  |  |  |  |  |  |  |  |  |  |  |  |
|  |  |  |  |  |  |  |  |  |  |  |  |  |  |  |
|  |  |  |  |  |  |  |  |  |  |  |  |  |  |  |
|  |  |  |  |  |  |  |  |  |  |  |  |  |  |  |
|  |  |  |  |  |  |  |  |  |  |  |  |  |  |  |
|  |  |  |  |  |  |  |  |  |  |  |  |  |  |  |
|  |  |  |  |  |  |  |  |  |  |  |  |  |  |  |
|  |  |  |  |  |  |  |  |  |  |  |  |  |  |  |
|  |  |  |  |  |  |  |  |  |  |  |  |  |  |  |
|  |  |  |  |  |  |  |  |  |  |  |  |  |  |  |
|  |  |  |  |  |  |  |  |  |  |  |  |  |  |  |
|  |  |  |  |  |  |  |  |  |  |  |  |  |  |  |
|  |  |  |  |  |  |  |  |  |  |  |  |  |  |  |
|  |  |  |  |  |  |  |  |  |  |  |  |  |  |  |
|  |  |  |  |  |  |  |  |  |  |  |  |  |  |  |
|  |  |  |  |  |  |  |  |  |  |  |  |  |  |  |
|  |  |  |  |  |  |  |  |  |  |  |  |  |  |  |
|  |  |  |  |  |  |  |  |  |  |  |  |  |  |  |
|  |  |  |  |  |  |  |  |  |  |  |  |  |  |  |
|  |  |  |  |  |  |  |  |  |  |  |  |  |  |  |
|  |  |  |  |  |  |  |  |  |  |  |  |  |  |  |
|  |  |  |  |  |  |  |  |  |  |  |  |  |  |  |
|  |  |  |  |  |  |  |  |  |  |  |  |  |  |  |
|  |  |  |  |  |  |  |  |  |  |  |  |  |  |  |
|  |  |  |  |  |  |  |  |  |  |  |  |  |  |  |
|  |  |  |  |  |  |  |  |  |  |  |  |  |  |  |
|  |  |  |  |  |  |  |  |  |  |  |  |  |  |  |
|  |  |  |  |  |  |  |  |  |  |  |  |  |  |  |
|  |  |  |  |  |  |  |  |  |  |  |  |  |  |  |
|  |  |  |  |  |  |  |  |  |  |  |  |  |  |  |
|  |  |  |  |  |  |  |  |  |  |  |  |  |  |  |
|  |  |  |  |  |  |  |  |  |  |  |  |  |  |  |
|  |  |  |  |  |  |  |  |  |  |  |  |  |  |  |

Crystal 10

| h | k | l | Fcal^2 | Fobs^2 | σ(Fobs^2) | |  | h | k | l | Fcal^2 | Fobs^2 | σ(Fobs^2) | |
| --- | --- | --- | --- | --- | --- | --- | --- | --- | --- | --- | --- | --- | --- | --- |
|  |  |  |  |  |  |  |  |  |  |  |  |  |  |  |
| 0 | 2 | 2 | 28795.29 | 249.43 | 133.82 |  |  | 1 | 6 | 7 | 2362.48 | 10.78 | 56.21 |  |
| 0 | 1 | 3 | 33682.98 | 183.49 | 114.87 |  |  | 3 | 6 | 7 | 5327.33 | 40.43 | 68.04 |  |
| 1 | 2 | 3 | 5905.12 | 26.27 | 49.44 |  |  | 5 | 6 | 7 | 2590.45 | 14.39 | 52.48 |  |
| 0 | 3 | 3 | 8611.42 | 75.15 | 65.18 |  |  | 0 | 7 | 7 | 3958.42 | 53.42 | 67.17 |  |
| 2 | 3 | 3 | 54631.37 | 326.59 | 165.18 |  |  | 2 | 7 | 7 | 2363.14 | 14.4 | 48.4 |  |
| 0 | 0 | 4 | 19775.4 | 330.47 | 13.02 |  |  | 4 | 7 | 7 | 4195.65 | 25.65 | 60.6 |  |
| 1 | 1 | 4 | 14981.72 | 78.38 | 109.9 |  |  | 6 | 7 | 7 | 4113.75 | 29 | 65.46 |  |
| 0 | 2 | 4 | 512.56 | 4.48 | 50.2 |  |  | 0 | 0 | 8 | 43849.33 | 649.16 | 203.95 |  |
| 2 | 2 | 4 | 16942.73 | 107.29 | 118.01 |  |  | 1 | 1 | 8 | 1179.21 | 8.3 | 27.68 |  |
| 1 | 3 | 4 | 37112.05 | 264.8 | 155.77 |  |  | 0 | 2 | 8 | 770.77 | 5.92 | 24.95 |  |
| 3 | 3 | 4 | 26755.59 | 167.49 | 168.76 |  |  | 2 | 2 | 8 | 6453.69 | 54.56 | 86.08 |  |
| 2 | 4 | 4 | 19286.59 | 336.05 | 147.07 |  |  | 1 | 3 | 8 | 3656.1 | 15 | 63.15 |  |
| 0 | 1 | 5 | 4372.55 | 28.97 | 42.16 |  |  | 3 | 3 | 8 | 2735.39 | 16.24 | 42.11 |  |
| 1 | 2 | 5 | 2806.32 | 12.34 | 54.77 |  |  | 0 | 4 | 8 | 29019.45 | 484.45 | 161.68 |  |
| 0 | 3 | 5 | 4997.85 | 32.61 | 31.04 |  |  | 2 | 4 | 8 | 6926.07 | 27.65 | 74.22 |  |
| 2 | 3 | 5 | 15078.64 | 83.47 | 114.94 |  |  | 4 | 4 | 8 | 18250.09 | 277.83 | 130.96 |  |
| 1 | 4 | 5 | 2560.96 | 11.93 | 76.11 |  |  | 1 | 5 | 8 | 7646.83 | 40.03 | 84.3 |  |
| 3 | 4 | 5 | 5562.31 | 34.66 | 58.75 |  |  | 3 | 5 | 8 | 1574.87 | 7.14 | 43.41 |  |
| 0 | 5 | 5 | 430.92 | 5.89 | 94.72 |  |  | 5 | 5 | 8 | 1543.43 | 10.66 | 32.31 |  |
| 2 | 5 | 5 | 793.91 | 6.06 | 20.6 |  |  | 0 | 6 | 8 | 5820.81 | 33.77 | 79.26 |  |
| 4 | 5 | 5 | 8002.68 | 51.2 | 108.86 |  |  | 2 | 6 | 8 | 540.32 | 3.33 | 29.41 |  |
| 0 | 0 | 6 | 7840.79 | 86.01 | 45.34 |  |  | 4 | 6 | 8 | 1115.41 | 6.31 | 33.61 |  |
| 1 | 1 | 6 | 6050.8 | 34.41 | 64.39 |  |  | 6 | 6 | 8 | 1925.43 | 13.11 | 43.92 |  |
| 0 | 2 | 6 | 10066.5 | 58.54 | 66.41 |  |  | 1 | 7 | 8 | 2990.77 | 12.33 | 54 |  |
| 2 | 2 | 6 | 50582.3 | 748.79 | 196.41 |  |  | 3 | 7 | 8 | 4083.62 | 16.18 | 63.7 |  |
| 1 | 3 | 6 | 1697.61 | 7.83 | 51.1 |  |  | 5 | 7 | 8 | 3599.6 | 16.15 | 59.91 |  |
| 3 | 3 | 6 | 5705.94 | 35.89 | 78.43 |  |  | 7 | 7 | 8 | 2928.82 | 19.89 | 54.54 |  |
| 0 | 4 | 6 | 3817.91 | 23.19 | 50.23 |  |  | 0 | 8 | 8 | 25554.61 | 838.84 | 146.98 |  |
| 2 | 4 | 6 | 4415.63 | 18.28 | 71.45 |  |  | 2 | 8 | 8 | 3844.78 | 23.98 | 63.21 |  |
| 4 | 4 | 6 | 4641.19 | 27.01 | 65.28 |  |  | 4 | 8 | 8 | 15951.31 | 211.89 | 127.36 |  |
| 1 | 5 | 6 | 9905.16 | 37.67 | 87.98 |  |  | 6 | 8 | 8 | 3115.75 | 20.87 | 56.6 |  |
| 3 | 5 | 6 | 7707.92 | 30.84 | 90.56 |  |  | 8 | 8 | 8 | 8167.35 | 163 | 92.75 |  |
| 5 | 5 | 6 | 13221.04 | 79.65 | 103.38 |  |  | 0 | 1 | 9 | 5714.67 | 30.73 | 87.92 |  |
| 0 | 6 | 6 | 6227.64 | 101.4 | 84.43 |  |  | 1 | 2 | 9 | 5860.11 | 22.86 | 74.58 |  |
| 2 | 6 | 6 | 31396.84 | 612.95 | 162.87 |  |  | 0 | 3 | 9 | 2588.19 | 14.72 | 48.03 |  |
| 4 | 6 | 6 | 8697.89 | 53.13 | 89.14 |  |  | 2 | 3 | 9 | 1403.16 | 6.5 | 39.84 |  |
| 0 | 1 | 7 | 10512.48 | 56.01 | 74.24 |  |  | 1 | 4 | 9 | 952.68 | 4.71 | 38.7 |  |
| 1 | 2 | 7 | 6698.7 | 29.24 | 74.91 |  |  | 3 | 4 | 9 | 5376.49 | 24.03 | 65.48 |  |
| 0 | 3 | 7 | 1467.25 | 9.92 | 43.56 |  |  | 0 | 5 | 9 | 476.64 | 5.66 | 35.22 |  |
| 2 | 3 | 7 | 6513.03 | 25.11 | 62.84 |  |  | 2 | 5 | 9 | 2795.96 | 12.54 | 58.01 |  |
| 1 | 4 | 7 | 5688.56 | 22.43 | 67.27 |  |  | 4 | 5 | 9 | 1324.16 | 6.76 | 40.81 |  |
| 3 | 4 | 7 | 2139.64 | 11.2 | 50.57 |  |  | 1 | 6 | 9 | 2918.53 | 11.46 | 48.61 |  |
| 0 | 5 | 7 | 4476.43 | 37.35 | 42.52 |  |  | 3 | 6 | 9 | 1458.83 | 6.66 | 38.48 |  |
| 2 | 5 | 7 | 2013.94 | 9.07 | 39.65 |  |  | 5 | 6 | 9 | 617.38 | 3.78 | 26 |  |
| 4 | 5 | 7 | 6167.66 | 28.32 | 69.21 |  |  | 0 | 7 | 9 | 3975.22 | 23.21 | 56.59 |  |

| h | k | l | Fcal^2 | Fobs^2 | (Fobs^2) | |  | h | k | l | Fcal^2 | Fobs^2 | (Fobs^2) | |
| --- | --- | --- | --- | --- | --- | --- | --- | --- | --- | --- | --- | --- | --- | --- |
|  |  |  |  |  |  |  |  |  |  |  |  |  |  |  |
| 4 | 6 | 12 | 2345.18 | 12.84 | 48.44 |  |  | 2 | 7 | 13 | 1311.57 | 6.83 | 36.63 |  |
| 6 | 6 | 12 | 43.9 | 2.88 | 6.85 |  |  | 4 | 7 | 13 | 505.72 | 5.78 | 21.65 |  |
| 1 | 7 | 12 | 139.55 | 2.77 | 12.7 |  |  | 6 | 7 | 13 | 330.56 | 4.95 | 19.22 |  |
| 3 | 7 | 12 | 955.79 | 5.25 | 31.17 |  |  | 1 | 8 | 13 | 751.26 | 4.81 | 27.95 |  |
| 5 | 7 | 12 | 490.2 | 3.96 | 23.99 |  |  | 3 | 8 | 13 | 89.26 | 2.88 | 7.99 |  |
| 7 | 7 | 12 | 658.91 | 7.52 | 23.76 |  |  | 5 | 8 | 13 | 45.55 | 2.73 | 6.92 |  |
| 0 | 8 | 12 | 5051.44 | 61.01 | 69.32 |  |  | 7 | 8 | 13 | 465.52 | 6.57 | 21.39 |  |
| 2 | 8 | 12 | 323.93 | 3.28 | 18.37 |  |  | 0 | 9 | 13 | 692.5 | 6.4 | 25.38 |  |
| 4 | 8 | 12 | 3459.94 | 23.08 | 58.65 |  |  | 2 | 9 | 13 | 57.43 | 2.77 | 9.16 |  |
| 6 | 8 | 12 | 104.46 | 3.28 | 10.46 |  |  | 4 | 9 | 13 | 579.79 | 5.11 | 24.24 |  |
| 8 | 8 | 12 | 2991.71 | 23.71 | 52.92 |  |  | 6 | 9 | 13 | 619.12 | 6.21 | 25.65 |  |
| 1 | 9 | 12 | 361.44 | 3.5 | 19.27 |  |  | 8 | 9 | 13 | 341.69 | 4.52 | 18.08 |  |
| 3 | 9 | 12 | 860.05 | 5.6 | 30.26 |  |  | 1 | 10 | 13 | 371.02 | 4.07 | 18.78 |  |
| 5 | 9 | 12 | 421.4 | 10.04 | 21.71 |  |  | 3 | 10 | 13 | 764.47 | 6.48 | 26.09 |  |
| 7 | 9 | 12 | 474.2 | 4.86 | 22.19 |  |  | 5 | 10 | 13 | 595.98 | 6.86 | 24.74 |  |
| 9 | 9 | 12 | 479.14 | 7.2 | 21.82 |  |  | 7 | 10 | 13 | 131.43 | 5.11 | 11.23 |  |
| 0 | 10 | 12 | 203.94 | 4.8 | 14.36 |  |  | 9 | 10 | 13 | 91.14 | 4.12 | 8.96 |  |
| 2 | 10 | 12 | 70.38 | 2.88 | 9.93 |  |  | 0 | 11 | 13 | 0.6 | 4.16 | 0.45 |  |
| 4 | 10 | 12 | 456.38 | 3.9 | 23.14 |  |  | 2 | 11 | 13 | 309.47 | 4.01 | 16.72 |  |
| 6 | 10 | 12 | 640.79 | 5.98 | 25.36 |  |  | 4 | 11 | 13 | 619.74 | 6.83 | 24.94 |  |
| 8 | 10 | 12 | 472.76 | 5.99 | 22.35 |  |  | 6 | 11 | 13 | 329.32 | 5.22 | 16.61 |  |
| 10 | 10 | 12 | 416.99 | 8.44 | 19.89 |  |  | 8 | 11 | 13 | 71.68 | 3.99 | 8.06 |  |
| 1 | 11 | 12 | 793.92 | 5.37 | 27.15 |  |  | 10 | 11 | 13 | 193.93 | 6.18 | 13.16 |  |
| 3 | 11 | 12 | 909.18 | 6.76 | 29.49 |  |  | 1 | 12 | 13 | 258.21 | 4.01 | 16.69 |  |
| 5 | 11 | 12 | 516.66 | 6.08 | 23.1 |  |  | 3 | 12 | 13 | 216.62 | 3.56 | 15.46 |  |
| 7 | 11 | 12 | 204.29 | 5.09 | 13.95 |  |  | 5 | 12 | 13 | 164.5 | 4.28 | 12.93 |  |
| 9 | 11 | 12 | 129.19 | 5.98 | 10.7 |  |  | 7 | 12 | 13 | 271.48 | 5.3 | 16.03 |  |
| 11 | 11 | 12 | 160.23 | 10.37 | 11.73 |  |  | 9 | 12 | 13 | 217.77 | 5.73 | 14.66 |  |
| 0 | 12 | 12 | 2497.17 | 41.65 | 46.66 |  |  | 11 | 12 | 13 | 95.58 | 5.28 | 9.46 |  |
| 2 | 12 | 12 | 904.61 | 9.41 | 31.2 |  |  | 0 | 13 | 13 | 178.42 | 8.6 | 12.41 |  |
| 4 | 12 | 12 | 3066.81 | 47.38 | 56.57 |  |  | 2 | 13 | 13 | 75.93 | 5.12 | 10.25 |  |
| 6 | 12 | 12 | 68.66 | 5.41 | 9.15 |  |  | 4 | 13 | 13 | 123.19 | 4.48 | 11.67 |  |
| 8 | 12 | 12 | 1492.26 | 16.64 | 37.87 |  |  | 6 | 13 | 13 | 352.23 | 7.34 | 18.6 |  |
| 10 | 12 | 12 | 163.39 | 5.86 | 11.73 |  |  | 8 | 13 | 13 | 52.05 | 6.06 | 6.99 |  |
| 12 | 12 | 12 | 995.76 | 25.13 | 30.04 |  |  | 10 | 13 | 13 | 83.03 | 8.12 | 8.53 |  |
| 0 | 1 | 13 | 652.05 | 9.73 | 26.65 |  |  | 12 | 13 | 13 | 69.28 | 7.28 | 8.19 |  |
| 1 | 2 | 13 | 522.99 | 4.64 | 24.17 |  |  | 0 | 0 | 14 | 185.16 | 8.15 | 14.47 |  |
| 0 | 3 | 13 | 456.96 | 4.8 | 24.19 |  |  | 1 | 1 | 14 | 2269.31 | 13.58 | 45.78 |  |
| 2 | 3 | 13 | 1371.95 | 6.34 | 37.92 |  |  | 0 | 2 | 14 | 1446.62 | 9.44 | 36.34 |  |
| 1 | 4 | 13 | 2044.15 | 8.77 | 45.59 |  |  | 2 | 2 | 14 | 7093.59 | 71.58 | 83.91 |  |
| 3 | 4 | 13 | 1511.91 | 8.99 | 38.48 |  |  | 1 | 3 | 14 | 1321.55 | 6.78 | 38.97 |  |
| 0 | 5 | 13 | 17.04 | 3.52 | 4.59 |  |  | 3 | 3 | 14 | 164.98 | 4.16 | 14.92 |  |
| 2 | 5 | 13 | 2646.78 | 35.95 | 54.46 |  |  | 0 | 4 | 14 | 1237.77 | 10.19 | 34.61 |  |
| 4 | 5 | 13 | 787.15 | 4.58 | 28.48 |  |  | 2 | 4 | 14 | 779.82 | 4.64 | 27.64 |  |
| 1 | 6 | 13 | 770.21 | 4.75 | 26.95 |  |  | 4 | 4 | 14 | 1028.23 | 8 | 32.33 |  |
| 3 | 6 | 13 | 417.15 | 3.79 | 20.34 |  |  | 1 | 5 | 14 | 134.29 | 2.99 | 10.7 |  |
| 5 | 6 | 13 | 58.68 | 2.26 | 8.1 |  |  | 3 | 5 | 14 | 253.47 | 3.11 | 15.91 |  |
| 0 | 7 | 13 | 802.15 | 6.88 | 28.92 |  |  | 5 | 5 | 14 | 1990.26 | 13.12 | 42.24 |  |

| h | k | l | Fcal^2 | Fobs^2 | (Fobs^2) | |  | h | k | l | Fcal^2 | Fobs^2 | (Fobs^2) | |
| --- | --- | --- | --- | --- | --- | --- | --- | --- | --- | --- | --- | --- | --- | --- |
|  |  |  |  |  |  |  |  |  |  |  |  |  |  |  |
| 0 | 6 | 14 | 505.25 | 6.08 | 22.87 |  |  | 8 | 14 | 14 | 41.19 | 6.19 | 5.61 |  |
| 2 | 6 | 14 | 4545.28 | 27.62 | 67.04 |  |  | 10 | 14 | 14 | 305.37 | 7.34 | 17.18 |  |
| 4 | 6 | 14 | 184.93 | 2.99 | 13.75 |  |  | 12 | 14 | 14 | 14.01 | 7.48 | 3.36 |  |
| 6 | 6 | 14 | 2370.93 | 24.03 | 48.02 |  |  | 14 | 14 | 14 | 109.02 | 13.7 | 11.1 |  |
| 1 | 7 | 14 | 600.76 | 4.3 | 26.03 |  |  | 0 | 1 | 15 | 149.33 | 3.84 | 11.77 |  |
| 3 | 7 | 14 | 175.16 | 3.19 | 13.53 |  |  | 1 | 2 | 15 | 359.74 | 3.73 | 19.53 |  |
| 5 | 7 | 14 | 151.62 | 2.99 | 13.09 |  |  | 0 | 3 | 15 | 1323.49 | 16.98 | 37.55 |  |
| 7 | 7 | 14 | 618.18 | 8.16 | 24.8 |  |  | 2 | 3 | 15 | 446.92 | 4.32 | 20.48 |  |
| 0 | 8 | 14 | 462.47 | 5.89 | 21.86 |  |  | 1 | 4 | 15 | 504.71 | 4.13 | 22.57 |  |
| 2 | 8 | 14 | 680.96 | 4.64 | 25.56 |  |  | 3 | 4 | 15 | 63.42 | 2.94 | 8.19 |  |
| 4 | 8 | 14 | 178.56 | 2.94 | 13.94 |  |  | 0 | 5 | 15 | 175.18 | 4.48 | 12.33 |  |
| 6 | 8 | 14 | 259.59 | 10.04 | 16.89 |  |  | 2 | 5 | 15 | 330.38 | 4.09 | 18.74 |  |
| 8 | 8 | 14 | 306.1 | 7.68 | 17.07 |  |  | 4 | 5 | 15 | 1148.52 | 7.22 | 33.04 |  |
| 1 | 9 | 14 | 1070.38 | 6.73 | 30.65 |  |  | 1 | 6 | 15 | 450.54 | 4.18 | 22.02 |  |
| 3 | 9 | 14 | 328.82 | 3.67 | 18.06 |  |  | 3 | 6 | 15 | 882.08 | 5.65 | 29.64 |  |
| 5 | 9 | 14 | 98.89 | 2.82 | 9.8 |  |  | 5 | 6 | 15 | 95.32 | 3.81 | 10.29 |  |
| 7 | 9 | 14 | 320.4 | 6.11 | 17.63 |  |  | 0 | 7 | 15 | 345.23 | 5.44 | 20.32 |  |
| 9 | 9 | 14 | 396.56 | 10.23 | 18.79 |  |  | 2 | 7 | 15 | 386.07 | 3.85 | 18.05 |  |
| 0 | 10 | 14 | 567.76 | 6.72 | 24.43 |  |  | 4 | 7 | 15 | 141.74 | 3.18 | 12.58 |  |
| 2 | 10 | 14 | 2656.91 | 25.25 | 50.38 |  |  | 6 | 7 | 15 | 419.32 | 4.18 | 21.06 |  |
| 4 | 10 | 14 | 157.36 | 3.58 | 14.05 |  |  | 1 | 8 | 15 | 665.95 | 4.75 | 24.41 |  |
| 6 | 10 | 14 | 1956.09 | 15.85 | 43.19 |  |  | 3 | 8 | 15 | 428.36 | 4.06 | 21.78 |  |
| 8 | 10 | 14 | 231.49 | 5.03 | 15.19 |  |  | 5 | 8 | 15 | 306.26 | 3.67 | 16.72 |  |
| 10 | 10 | 14 | 764.99 | 10.51 | 26.81 |  |  | 7 | 8 | 15 | 318.07 | 4.98 | 18.18 |  |
| 1 | 11 | 14 | 105.99 | 4.14 | 10.46 |  |  | 0 | 9 | 15 | 600.86 | 7.7 | 22.17 |  |
| 3 | 11 | 14 | 445.47 | 4.64 | 22.13 |  |  | 2 | 9 | 15 | 311.62 | 3.85 | 16.57 |  |
| 5 | 11 | 14 | 304.13 | 5.56 | 18.37 |  |  | 4 | 9 | 15 | 38.62 | 2.77 | 5.38 |  |
| 7 | 11 | 14 | 191.87 | 4.41 | 13.98 |  |  | 6 | 9 | 15 | 310.42 | 5.02 | 17.45 |  |
| 9 | 11 | 14 | 45.59 | 4.75 | 7.28 |  |  | 8 | 9 | 15 | 220.16 | 4.74 | 13.7 |  |
| 11 | 11 | 14 | 20.87 | 5.41 | 3.19 |  |  | 1 | 10 | 15 | 504.48 | 5.24 | 22.55 |  |
| 0 | 12 | 14 | 77.7 | 4.31 | 8.92 |  |  | 3 | 10 | 15 | 30.38 | 3.11 | 5.39 |  |
| 2 | 12 | 14 | 199.54 | 4.22 | 13.81 |  |  | 5 | 10 | 15 | 141.42 | 5.31 | 13.61 |  |
| 4 | 12 | 14 | 136.36 | 3.26 | 12.7 |  |  | 7 | 10 | 15 | 138.33 | 5.06 | 11.57 |  |
| 6 | 12 | 14 | 173.7 | 4.98 | 12.87 |  |  | 9 | 10 | 15 | 67.7 | 6.06 | 8.15 |  |
| 8 | 12 | 14 | 81.93 | 5.25 | 8.91 |  |  | 0 | 11 | 15 | 114.88 | 5.44 | 11.65 |  |
| 10 | 12 | 14 | 42 | 4.9 | 6.01 |  |  | 2 | 11 | 15 | 179.78 | 4.87 | 12.56 |  |
| 12 | 12 | 14 | 80.59 | 10.76 | 9.33 |  |  | 4 | 11 | 15 | 305.18 | 6.64 | 19.36 |  |
| 1 | 13 | 14 | 169.19 | 3.96 | 12.46 |  |  | 6 | 11 | 15 | 30.61 | 3.73 | 4.17 |  |
| 3 | 13 | 14 | 144.65 | 3.5 | 11.62 |  |  | 8 | 11 | 15 | 29.65 | 4.12 | 5.97 |  |
| 5 | 13 | 14 | 91.79 | 4.51 | 8.22 |  |  | 10 | 11 | 15 | 89.32 | 6.05 | 8.97 |  |
| 7 | 13 | 14 | 87.17 | 5.29 | 8.28 |  |  | 1 | 12 | 15 | 14.95 | 4.07 | 3.54 |  |
| 9 | 13 | 14 | 62.6 | 6.18 | 7.4 |  |  | 3 | 12 | 15 | 191.9 | 6.48 | 13.91 |  |
| 11 | 13 | 14 | 39.93 | 6.46 | 5.69 |  |  | 5 | 12 | 15 | 123.51 | 4.56 | 9.99 |  |
| 13 | 13 | 14 | 57.36 | 41.65 | 4.97 |  |  | 7 | 12 | 15 | 54.86 | 4.33 | 6.86 |  |
| 0 | 14 | 14 | 20.04 | 7.24 | 4.39 |  |  | 9 | 12 | 15 | 44.65 | 4.32 | 5.76 |  |
| 2 | 14 | 14 | 678.04 | 8.76 | 25.49 |  |  | 11 | 12 | 15 | 18.87 | 4.75 | 4.49 |  |
| 4 | 14 | 14 | 141.4 | 4.8 | 13.71 |  |  | 0 | 13 | 15 | 241.79 | 10.41 | 14.52 |  |
| 6 | 14 | 14 | 958.03 | 12.3 | 28.16 |  |  | 2 | 13 | 15 | 81 | 3.9 | 8.58 |  |

| h | k | l | Fcal^2 | Fobs^2 | (Fobs^2) | |  | h | k | l | Fcal^2 | Fobs^2 | (Fobs^2) | |
| --- | --- | --- | --- | --- | --- | --- | --- | --- | --- | --- | --- | --- | --- | --- |
|  |  |  |  |  |  |  |  |  |  |  |  |  |  |  |
| 4 | 13 | 15 | 34.37 | 3.17 | 6.1 |  |  | 9 | 9 | 16 | 88.79 | 7.02 | 9.02 |  |
| 6 | 13 | 15 | 123.14 | 5.14 | 10.44 |  |  | 0 | 10 | 16 | 105.46 | 4.48 | 9.93 |  |
| 8 | 13 | 15 | 100.21 | 5.51 | 9.56 |  |  | 2 | 10 | 16 | 217.65 | 3.67 | 14.24 |  |
| 10 | 13 | 15 | 20.34 | 5.23 | 4.23 |  |  | 4 | 10 | 16 | 172.53 | 3.67 | 13.72 |  |
| 12 | 13 | 15 | 39.22 | 4.94 | 6.12 |  |  | 6 | 10 | 16 | 3.93 | 4.39 | 2.16 |  |
| 1 | 14 | 15 | 20.83 | 3.55 | 4.65 |  |  | 8 | 10 | 16 | 135.81 | 5.12 | 11.46 |  |
| 3 | 14 | 15 | 44.14 | 4.11 | 7.41 |  |  | 10 | 10 | 16 | 105.55 | 6.38 | 10.36 |  |
| 5 | 14 | 15 | 130.82 | 4.96 | 10.99 |  |  | 1 | 11 | 16 | 227.6 | 4.01 | 14.6 |  |
| 7 | 14 | 15 | 75.44 | 4.65 | 8.44 |  |  | 3 | 11 | 16 | 1.48 | 3.22 | 1.13 |  |
| 9 | 14 | 15 | 25.6 | 5.05 | 5.41 |  |  | 5 | 11 | 16 | 49.95 | 4.56 | 8.04 |  |
| 11 | 14 | 15 | 18.62 | 5.07 | 4.47 |  |  | 7 | 11 | 16 | 174.45 | 5.59 | 12.46 |  |
| 13 | 14 | 15 | 2.52 | 7.42 | 3.26 |  |  | 9 | 11 | 16 | 45.92 | 5.07 | 6.9 |  |
| 0 | 15 | 15 | 14.18 | 7.7 | 4.68 |  |  | 11 | 11 | 16 | 27.99 | 7.28 | 3.64 |  |
| 2 | 15 | 15 | 64.13 | 5.12 | 7.53 |  |  | 0 | 12 | 16 | 485.44 | 7.04 | 21.06 |  |
| 4 | 15 | 15 | 28.64 | 5.22 | 6.4 |  |  | 2 | 12 | 16 | 16.04 | 3.17 | 4.03 |  |
| 6 | 15 | 15 | 67.98 | 6.38 | 7.04 |  |  | 4 | 12 | 16 | 944.95 | 8.3 | 28.93 |  |
| 8 | 15 | 15 | 49.53 | 7.15 | 7.65 |  |  | 6 | 12 | 16 | 218.91 | 5.51 | 14.37 |  |
| 10 | 15 | 15 | 54.1 | 8.89 | 6.67 |  |  | 8 | 12 | 16 | 430.17 | 6.33 | 19.68 |  |
| 12 | 15 | 15 | 8.94 | 28.52 | 3.6 |  |  | 10 | 12 | 16 | 3.99 | 5.87 | 1.22 |  |
| 0 | 0 | 16 | 2704.29 | 36.67 | 56.02 |  |  | 12 | 12 | 16 | 74.87 | 11.4 | 8.86 |  |
| 1 | 1 | 16 | 1426.69 | 11.68 | 39.53 |  |  | 1 | 13 | 16 | 25.46 | 3.6 | 5.27 |  |
| 0 | 2 | 16 | 834.17 | 8.3 | 30.29 |  |  | 3 | 13 | 16 | 43.96 | 3.67 | 7.05 |  |
| 2 | 2 | 16 | 79.48 | 4.63 | 10.03 |  |  | 5 | 13 | 16 | 191.9 | 5.39 | 13.57 |  |
| 1 | 3 | 16 | 184.2 | 3.83 | 13.67 |  |  | 7 | 13 | 16 | 62.44 | 4.34 | 8.66 |  |
| 3 | 3 | 16 | 705.99 | 7.2 | 27.92 |  |  | 9 | 13 | 16 | 3.22 | 4.42 | 2.5 |  |
| 0 | 4 | 16 | 2645.02 | 20.64 | 54.22 |  |  | 11 | 13 | 16 | 0 | 4.8 | 0.96 |  |
| 2 | 4 | 16 | 225.67 | 3.28 | 14.24 |  |  | 0 | 14 | 16 | 97.96 | 6.24 | 10.31 |  |
| 4 | 4 | 16 | 1904.97 | 20.63 | 43.59 |  |  | 2 | 14 | 16 | 30.33 | 3.79 | 5.42 |  |
| 1 | 5 | 16 | 226.73 | 3.62 | 15.8 |  |  | 4 | 14 | 16 | 37.95 | 3.27 | 7.42 |  |
| 3 | 5 | 16 | 170.22 | 3.4 | 13.36 |  |  | 6 | 14 | 16 | 50.67 | 5.06 | 6.89 |  |
| 5 | 5 | 16 | 197.78 | 5.59 | 14.71 |  |  | 8 | 14 | 16 | 27.61 | 6.19 | 5.81 |  |
| 0 | 6 | 16 | 239.76 | 5.44 | 15.49 |  |  | 10 | 14 | 16 | 25.13 | 5.41 | 4.59 |  |
| 2 | 6 | 16 | 338.22 | 4.49 | 19.2 |  |  | 12 | 14 | 16 | 5.85 | 12.66 | 3.46 |  |
| 4 | 6 | 16 | 29.89 | 4.19 | 5.03 |  |  | 1 | 15 | 16 | 48.55 | 4.39 | 6.73 |  |
| 6 | 6 | 16 | 565.27 | 8.8 | 24.51 |  |  | 3 | 15 | 16 | 24.53 | 4.88 | 5.77 |  |
| 1 | 7 | 16 | 379.41 | 4.58 | 18.84 |  |  | 5 | 15 | 16 | 46.17 | 4.99 | 6.23 |  |
| 3 | 7 | 16 | 330.52 | 4.33 | 17.42 |  |  | 7 | 15 | 16 | 29.44 | 5.94 | 5.09 |  |
| 5 | 7 | 16 | 86.34 | 4.4 | 9.33 |  |  | 9 | 15 | 16 | 31.19 | 6.47 | 5.38 |  |
| 7 | 7 | 16 | 96.01 | 4.95 | 9.9 |  |  | 11 | 15 | 16 | 25 | 15.64 | 5.05 |  |
| 0 | 8 | 16 | 4281.59 | 79.67 | 62.79 |  |  | 0 | 16 | 16 | 320.63 | 14.03 | 18.23 |  |
| 2 | 8 | 16 | 537.92 | 4.81 | 23.41 |  |  | 2 | 16 | 16 | 9.13 | 7.04 | 4.17 |  |
| 4 | 8 | 16 | 1053.53 | 7.04 | 32.28 |  |  | 4 | 16 | 16 | 185.18 | 8.12 | 13.14 |  |
| 6 | 8 | 16 | 110.09 | 3.22 | 10.88 |  |  | 6 | 16 | 16 | 17.99 | 6.83 | 4.62 |  |
| 8 | 8 | 16 | 1710.95 | 28.1 | 39.9 |  |  | 8 | 16 | 16 | 137.79 | 14.31 | 12.41 |  |
| 1 | 9 | 16 | 379.04 | 7.23 | 19.83 |  |  | 10 | 16 | 16 | 43.82 | 10.11 | 7.16 |  |
| 3 | 9 | 16 | 142.33 | 3.93 | 12.65 |  |  | 0 | 1 | 17 | 36.32 | 5.27 | 6.32 |  |
| 5 | 9 | 16 | 358.58 | 5.36 | 19.97 |  |  | 1 | 2 | 17 | 270.16 | 3.61 | 16.99 |  |
| 7 | 9 | 16 | 258.4 | 6.97 | 15.77 |  |  | 0 | 3 | 17 | 492.1 | 6.4 | 23.87 |  |

| h | k | l | Fcal^2 | Fobs^2 | (Fobs^2) | |  | h | k | l | Fcal^2 | Fobs^2 | (Fobs^2) | |
| --- | --- | --- | --- | --- | --- | --- | --- | --- | --- | --- | --- | --- | --- | --- |
|  |  |  |  |  |  |  |  |  |  |  |  |  |  |  |
| 2 | 3 | 17 | 143.99 | 3.17 | 12.42 |  |  | 7 | 14 | 17 | 66.78 | 5.27 | 7.62 |  |
| 1 | 4 | 17 | 89.36 | 3.4 | 9.6 |  |  | 9 | 14 | 17 | 28.83 | 4.91 | 4.8 |  |
| 3 | 4 | 17 | 58.38 | 2.99 | 7.42 |  |  | 11 | 14 | 17 | 6.17 | 6.17 | 2.75 |  |
| 0 | 5 | 17 | 731.09 | 14.26 | 26.66 |  |  | 0 | 15 | 17 | 56.01 | 5.92 | 7.19 |  |
| 2 | 5 | 17 | 122.56 | 3.33 | 11.28 |  |  | 2 | 15 | 17 | 43.02 | 4.45 | 7.26 |  |
| 4 | 5 | 17 | 388.98 | 4.3 | 19.23 |  |  | 4 | 15 | 17 | 17.27 | 5.65 | 4.36 |  |
| 1 | 6 | 17 | 503.62 | 5.68 | 22.16 |  |  | 6 | 15 | 17 | 15.09 | 5.98 | 4.19 |  |
| 3 | 6 | 17 | 423.42 | 5.69 | 20.21 |  |  | 8 | 15 | 17 | 11.1 | 5.81 | 3.6 |  |
| 5 | 6 | 17 | 90.55 | 3.4 | 9.47 |  |  | 10 | 15 | 17 | 10.3 | 7.83 | 3.24 |  |
| 0 | 7 | 17 | 435.62 | 6.56 | 20.61 |  |  | 1 | 16 | 17 | 15.49 | 5.13 | 4.72 |  |
| 2 | 7 | 17 | 185.16 | 3.79 | 13.01 |  |  | 3 | 16 | 17 | 12.66 | 4.94 | 4.22 |  |
| 4 | 7 | 17 | 48.2 | 3.5 | 6.75 |  |  | 5 | 16 | 17 | 6.86 | 6.59 | 2.56 |  |
| 6 | 7 | 17 | 184.16 | 3.85 | 13.77 |  |  | 7 | 16 | 17 | 13.79 | 10.74 | 3.48 |  |
| 1 | 8 | 17 | 407.59 | 4.69 | 20.42 |  |  | 9 | 16 | 17 | 26.37 | 10.56 | 4.7 |  |
| 3 | 8 | 17 | 256.69 | 4.26 | 15.76 |  |  | 0 | 17 | 17 | 41.52 | 10.86 | 7.71 |  |
| 5 | 8 | 17 | 152.12 | 3.86 | 12.17 |  |  | 2 | 17 | 17 | 51.87 | 11.2 | 7.27 |  |
| 7 | 8 | 17 | 86.69 | 4.39 | 10.8 |  |  | 4 | 17 | 17 | 8.01 | 13.11 | 3.45 |  |
| 0 | 9 | 17 | 142.55 | 6.34 | 10.22 |  |  | 6 | 17 | 17 | 9.12 | 11.97 | 2.07 |  |
| 2 | 9 | 17 | 176.1 | 4.72 | 13.99 |  |  | 8 | 17 | 17 | 29.55 | 18.11 | 2.01 |  |
| 4 | 9 | 17 | 55.03 | 3.17 | 7.06 |  |  | 0 | 0 | 18 | 80.71 | 12.22 | 10.81 |  |
| 6 | 9 | 17 | 117.27 | 6.48 | 12.91 |  |  | 1 | 1 | 18 | 457.79 | 7.2 | 21.84 |  |
| 8 | 9 | 17 | 98.54 | 6.16 | 9.71 |  |  | 0 | 2 | 18 | 270.32 | 5.44 | 16.24 |  |
| 1 | 10 | 17 | 246.07 | 4.99 | 15.28 |  |  | 2 | 2 | 18 | 1235.18 | 10.72 | 35.16 |  |
| 3 | 10 | 17 | 18.19 | 3.83 | 3.49 |  |  | 1 | 3 | 18 | 157.12 | 3.4 | 13.55 |  |
| 5 | 10 | 17 | 29.64 | 3.71 | 5.32 |  |  | 3 | 3 | 18 | 199.23 | 5.27 | 14.34 |  |
| 7 | 10 | 17 | 73.6 | 5.19 | 7.51 |  |  | 0 | 4 | 18 | 361.92 | 6.34 | 18.65 |  |
| 9 | 10 | 17 | 54.08 | 5.02 | 7.25 |  |  | 2 | 4 | 18 | 244.02 | 3.67 | 15.16 |  |
| 0 | 11 | 17 | 28.71 | 5.89 | 5.14 |  |  | 4 | 4 | 18 | 139.7 | 5.27 | 11.4 |  |
| 2 | 11 | 17 | 86.54 | 4.06 | 8.73 |  |  | 1 | 5 | 18 | 172.51 | 3.73 | 12.79 |  |
| 4 | 11 | 17 | 147.42 | 4.96 | 12.53 |  |  | 3 | 5 | 18 | 206.94 | 3.84 | 13.69 |  |
| 6 | 11 | 17 | 18.91 | 4.43 | 3.57 |  |  | 5 | 5 | 18 | 364.97 | 6.56 | 17.35 |  |
| 8 | 11 | 17 | 84.33 | 5.52 | 8.47 |  |  | 0 | 6 | 18 | 26.75 | 4.63 | 6.28 |  |
| 10 | 11 | 17 | 69.82 | 6.31 | 7.87 |  |  | 2 | 6 | 18 | 1517.7 | 11.85 | 37.51 |  |
| 1 | 12 | 17 | 18.58 | 3.79 | 4.21 |  |  | 4 | 6 | 18 | 203.81 | 3.96 | 13.62 |  |
| 3 | 12 | 17 | 112.06 | 4.07 | 10.99 |  |  | 6 | 6 | 18 | 721.96 | 8.96 | 26.19 |  |
| 5 | 12 | 17 | 29.9 | 4.73 | 6.7 |  |  | 1 | 7 | 18 | 154.06 | 4.79 | 12.48 |  |
| 7 | 12 | 17 | 22.16 | 4.94 | 4.5 |  |  | 3 | 7 | 18 | 38.87 | 3.65 | 7.19 |  |
| 9 | 12 | 17 | 16.32 | 5.39 | 4.12 |  |  | 5 | 7 | 18 | 84.57 | 3.45 | 9.01 |  |
| 11 | 12 | 17 | 1.13 | 6 | 2.09 |  |  | 7 | 7 | 18 | 76.79 | 4.63 | 9.94 |  |
| 0 | 13 | 17 | 48.16 | 5.44 | 6.6 |  |  | 0 | 8 | 18 | 358.02 | 7.47 | 18.66 |  |
| 2 | 13 | 17 | 61.2 | 3.85 | 8.75 |  |  | 2 | 8 | 18 | 92.34 | 4.19 | 8.86 |  |
| 4 | 13 | 17 | 38.92 | 4.6 | 6.66 |  |  | 4 | 8 | 18 | 54.87 | 3.45 | 7.13 |  |
| 6 | 13 | 17 | 17.08 | 4.23 | 4.43 |  |  | 6 | 8 | 18 | 93.86 | 3.53 | 10.33 |  |
| 8 | 13 | 17 | 53.62 | 4.9 | 6.66 |  |  | 8 | 8 | 18 | 58.07 | 7.04 | 7.61 |  |
| 10 | 13 | 17 | 13.96 | 6.53 | 3.85 |  |  | 1 | 9 | 18 | 122.38 | 4.24 | 9.81 |  |
| 1 | 14 | 17 | 10.38 | 4.01 | 2.63 |  |  | 3 | 9 | 18 | 59.74 | 4.01 | 7.41 |  |
| 3 | 14 | 17 | 10.59 | 4.31 | 3.96 |  |  | 5 | 9 | 18 | 47.8 | 3.62 | 6.57 |  |
| 5 | 14 | 17 | 85.43 | 5.46 | 9.85 |  |  | 7 | 9 | 18 | 42.89 | 4.74 | 6.93 |  |

| h | k | l | Fcal^2 | Fobs^2 | (Fobs^2) | |  | h | k | l | Fcal^2 | Fobs^2 | (Fobs^2) | |
| --- | --- | --- | --- | --- | --- | --- | --- | --- | --- | --- | --- | --- | --- | --- |
|  |  |  |  |  |  |  |  |  |  |  |  |  |  |  |
| 9 | 9 | 18 | 57.67 | 7.93 | 6.74 |  |  | 0 | 3 | 19 | 1.72 | 4.53 | 1.01 |  |
| 0 | 10 | 18 | 270.25 | 6.24 | 16.77 |  |  | 2 | 3 | 19 | 187.56 | 4.13 | 13.02 |  |
| 2 | 10 | 18 | 683.32 | 8.23 | 25.15 |  |  | 1 | 4 | 19 | 309.35 | 4.52 | 17.03 |  |
| 4 | 10 | 18 | 38.74 | 3.73 | 6.44 |  |  | 3 | 4 | 19 | 229.98 | 4.75 | 15.45 |  |
| 6 | 10 | 18 | 465.9 | 6.83 | 20.37 |  |  | 0 | 5 | 19 | 102.92 | 7.24 | 9.95 |  |
| 8 | 10 | 18 | 23.05 | 4.95 | 4.01 |  |  | 2 | 5 | 19 | 260.9 | 5.21 | 16 |  |
| 10 | 10 | 18 | 318.76 | 10.76 | 17.67 |  |  | 4 | 5 | 19 | 47.96 | 5.57 | 6.57 |  |
| 1 | 11 | 18 | 40.99 | 3.73 | 6.96 |  |  | 1 | 6 | 19 | 54.64 | 3.79 | 7.54 |  |
| 3 | 11 | 18 | 121.6 | 4.07 | 11.62 |  |  | 3 | 6 | 19 | 92.17 | 4.48 | 9.16 |  |
| 5 | 11 | 18 | 67.44 | 3.98 | 9.19 |  |  | 5 | 6 | 19 | 42.07 | 4.46 | 6.57 |  |
| 7 | 11 | 18 | 88.39 | 5.88 | 8.93 |  |  | 0 | 7 | 19 | 165.15 | 5.44 | 12.7 |  |
| 9 | 11 | 18 | 27.92 | 6.36 | 4.89 |  |  | 2 | 7 | 19 | 161.06 | 4.18 | 11.48 |  |
| 11 | 11 | 18 | 0 | 8.48 | 0.2 |  |  | 4 | 7 | 19 | 42.53 | 3.85 | 6.91 |  |
| 0 | 12 | 18 | 0 | 5.27 | 0.47 |  |  | 6 | 7 | 19 | 41.75 | 4.79 | 6.75 |  |
| 2 | 12 | 18 | 64.5 | 3.84 | 7.88 |  |  | 1 | 8 | 19 | 165.6 | 4.46 | 12.27 |  |
| 4 | 12 | 18 | 42.49 | 4 | 7.2 |  |  | 3 | 8 | 19 | 25.25 | 3.67 | 5.56 |  |
| 6 | 12 | 18 | 41.22 | 5.1 | 5.81 |  |  | 5 | 8 | 19 | 39.82 | 3.67 | 5.83 |  |
| 8 | 12 | 18 | 50.6 | 4.85 | 6.61 |  |  | 7 | 8 | 19 | 14.69 | 3.33 | 4.78 |  |
| 10 | 12 | 18 | 31.9 | 5.83 | 6.01 |  |  | 0 | 9 | 19 | 57.59 | 5.92 | 6.91 |  |
| 12 | 12 | 18 | 15.18 | 25.8 | 3.07 |  |  | 2 | 9 | 19 | 24.57 | 3.61 | 4.87 |  |
| 1 | 13 | 18 | 20.58 | 4.09 | 4.44 |  |  | 4 | 9 | 19 | 79.17 | 3.79 | 9.07 |  |
| 3 | 13 | 18 | 81.66 | 4.45 | 9.27 |  |  | 6 | 9 | 19 | 49.68 | 4.73 | 7.71 |  |
| 5 | 13 | 18 | 30.22 | 5.58 | 4.79 |  |  | 8 | 9 | 19 | 44.76 | 6.23 | 5.84 |  |
| 7 | 13 | 18 | 18.54 | 4.81 | 4.04 |  |  | 1 | 10 | 19 | 92.83 | 3.96 | 9.72 |  |
| 9 | 13 | 18 | 23.29 | 7.12 | 4.32 |  |  | 3 | 10 | 19 | 79.14 | 4.82 | 9.15 |  |
| 11 | 13 | 18 | 16.92 | 8.47 | 3.6 |  |  | 5 | 10 | 19 | 31.94 | 3.79 | 6.66 |  |
| 0 | 14 | 18 | 2.03 | 6.56 | 0.97 |  |  | 7 | 10 | 19 | 13.06 | 5.14 | 3.02 |  |
| 2 | 14 | 18 | 254.54 | 6.09 | 15.98 |  |  | 9 | 10 | 19 | 11.81 | 4.91 | 3.95 |  |
| 4 | 14 | 18 | 41.68 | 5.79 | 6.36 |  |  | 0 | 11 | 19 | 4.93 | 5.44 | 1.57 |  |
| 6 | 14 | 18 | 160.45 | 6.69 | 12.97 |  |  | 2 | 11 | 19 | 20.76 | 4.01 | 4.35 |  |
| 8 | 14 | 18 | 23.29 | 6.36 | 5.22 |  |  | 4 | 11 | 19 | 55.41 | 4.26 | 8.97 |  |
| 10 | 14 | 18 | 71.99 | 10.7 | 9.14 |  |  | 6 | 11 | 19 | 41.88 | 4.8 | 6.1 |  |
| 1 | 15 | 18 | 14.31 | 5.78 | 4.94 |  |  | 8 | 11 | 19 | 37.36 | 5.68 | 6.4 |  |
| 3 | 15 | 18 | 14.49 | 6.38 | 4.83 |  |  | 10 | 11 | 19 | 53.7 | 7.71 | 7.14 |  |
| 5 | 15 | 18 | 17.59 | 8.83 | 4.28 |  |  | 1 | 12 | 19 | 8.28 | 4.47 | 3.12 |  |
| 7 | 15 | 18 | 17.89 | 6.91 | 3.97 |  |  | 3 | 12 | 19 | 42.07 | 4.45 | 6.75 |  |
| 9 | 15 | 18 | 41.33 | 23.99 | 3.97 |  |  | 5 | 12 | 19 | 26.69 | 4.81 | 4.91 |  |
| 0 | 16 | 18 | 56.96 | 10.66 | 8.12 |  |  | 7 | 12 | 19 | 37.35 | 5.59 | 6.49 |  |
| 2 | 16 | 18 | 33.95 | 7.16 | 6.02 |  |  | 9 | 12 | 19 | 35.57 | 6 | 5.73 |  |
| 4 | 16 | 18 | 8.23 | 5.84 | 3.29 |  |  | 0 | 13 | 19 | 19.37 | 6.24 | 3.73 |  |
| 6 | 16 | 18 | 0 | 13.7 | 1.21 |  |  | 2 | 13 | 19 | 20.56 | 4.57 | 4.6 |  |
| 1 | 17 | 18 | 9.97 | 6.32 | 2.86 |  |  | 4 | 13 | 19 | 38.15 | 5.47 | 5.81 |  |
| 3 | 17 | 18 | 12.75 | 7.1 | 3.1 |  |  | 6 | 13 | 19 | 26.85 | 5.33 | 5.39 |  |
| 5 | 17 | 18 | 14.82 | 11.29 | 3.63 |  |  | 8 | 13 | 19 | 3.56 | 6.35 | 1.88 |  |
| 7 | 17 | 18 | 0 | 10.88 | 3.45 |  |  | 10 | 13 | 19 | 19.08 | 9.78 | 3.48 |  |
| 2 | 18 | 18 | 64.59 | 16.14 | 8.86 |  |  | 1 | 14 | 19 | 37.62 | 6.13 | 5.88 |  |
| 0 | 1 | 19 | 55.77 | 4.48 | 6.92 |  |  | 3 | 14 | 19 | 12.63 | 5.15 | 4.1 |  |
| 1 | 2 | 19 | 68.32 | 3.45 | 8.02 |  |  | 5 | 14 | 19 | 12.09 | 5.86 | 3.7 |  |

| h | k | l | Fcal^2 | Fobs^2 | (Fobs^2) | |  | h | k | l | Fcal^2 | Fobs^2 | (Fobs^2) | |
| --- | --- | --- | --- | --- | --- | --- | --- | --- | --- | --- | --- | --- | --- | --- |
|  |  |  |  |  |  |  |  |  |  |  |  |  |  |  |
| 7 | 14 | 19 | 9.89 | 8.46 | 4.05 |  |  | 1 | 11 | 20 | 68.32 | 4.41 | 8.35 |  |
| 9 | 14 | 19 | 21 | 9.29 | 3.16 |  |  | 3 | 11 | 20 | 32.77 | 6.24 | 5.15 |  |
| 0 | 15 | 19 | 75.78 | 10.8 | 9.18 |  |  | 5 | 11 | 20 | 34.15 | 5 | 5.39 |  |
| 2 | 15 | 19 | 28.94 | 7.18 | 4.96 |  |  | 7 | 11 | 20 | 5.15 | 5.69 | 1.68 |  |
| 4 | 15 | 19 | 15.68 | 11.34 | 1.17 |  |  | 9 | 11 | 20 | 19.4 | 12.16 | 4.49 |  |
| 6 | 15 | 19 | 10.53 | 10.65 | 4.18 |  |  | 0 | 12 | 20 | 132.33 | 11.54 | 11.84 |  |
| 8 | 15 | 19 | 10.8 | 14.23 | 2.79 |  |  | 2 | 12 | 20 | 61.79 | 4.69 | 8.3 |  |
| 1 | 16 | 19 | 3.46 | 5.56 | 2.77 |  |  | 4 | 12 | 20 | 212.93 | 7.47 | 14.86 |  |
| 3 | 16 | 19 | 8.86 | 10.75 | 2.81 |  |  | 6 | 12 | 20 | 4.46 | 4.95 | 3.22 |  |
| 7 | 16 | 19 | 17.65 | 19.92 | 3.86 |  |  | 8 | 12 | 20 | 141.65 | 9.66 | 12.04 |  |
| 0 | 17 | 19 | 0 | 27.16 | 5.13 |  |  | 10 | 12 | 20 | 4.87 | 11.76 | 3.39 |  |
| 2 | 17 | 19 | 8.09 | 7.53 | 3.78 |  |  | 1 | 13 | 20 | 38.89 | 6.03 | 6.37 |  |
| 0 | 0 | 20 | 585.76 | 14.94 | 24.08 |  |  | 3 | 13 | 20 | 8.94 | 5.65 | 3.31 |  |
| 1 | 1 | 20 | 36.6 | 5.41 | 5.68 |  |  | 5 | 13 | 20 | 7.77 | 6.42 | 3.57 |  |
| 0 | 2 | 20 | 32.43 | 5.76 | 5.12 |  |  | 7 | 13 | 20 | 31.45 | 21.28 | 4.24 |  |
| 2 | 2 | 20 | 173 | 6.4 | 12.68 |  |  | 9 | 13 | 20 | 18.2 | 22.98 | 4.28 |  |
| 1 | 3 | 20 | 88.75 | 4.46 | 9.49 |  |  | 0 | 14 | 20 | 19.42 | 8.54 | 4.19 |  |
| 3 | 3 | 20 | 57.54 | 5.59 | 6.9 |  |  | 2 | 14 | 20 | 16.6 | 6.91 | 3.97 |  |
| 0 | 4 | 20 | 611.62 | 20.14 | 23.92 |  |  | 4 | 14 | 20 | 19.74 | 14.34 | 5.14 |  |
| 2 | 4 | 20 | 116.96 | 5.19 | 10.26 |  |  | 8 | 14 | 20 | 11.19 | 22.63 | 2.93 |  |
| 4 | 4 | 20 | 1127.83 | 12.8 | 32.05 |  |  | 1 | 15 | 20 | 0 | 10.56 | 1.61 |  |
| 1 | 5 | 20 | 68.3 | 4.49 | 8.22 |  |  | 3 | 15 | 20 | 20.11 | 6.71 | 5 |  |
| 3 | 5 | 20 | 184.82 | 4.69 | 13.46 |  |  | 5 | 15 | 20 | 0 | 22.18 | 2.67 |  |
| 5 | 5 | 20 | 216.65 | 7.36 | 14.35 |  |  | 0 | 16 | 20 | 47.88 | 12.37 | 8.72 |  |
| 0 | 6 | 20 | 84.69 | 6.11 | 8.64 |  |  | 2 | 16 | 20 | 2.07 | 8.07 | 1.61 |  |
| 2 | 6 | 20 | 93.94 | 4.7 | 9.56 |  |  | 0 | 1 | 21 | 117.95 | 17.2 | 9.83 |  |
| 4 | 6 | 20 | 151.46 | 4.85 | 12.26 |  |  | 1 | 2 | 21 | 96.95 | 5.19 | 9.33 |  |
| 6 | 6 | 20 | 1.85 | 6.7 | 1.69 |  |  | 0 | 3 | 21 | 63.21 | 7.24 | 7.37 |  |
| 1 | 7 | 20 | 18.85 | 3.67 | 3.66 |  |  | 2 | 3 | 21 | 43.54 | 4.01 | 5.83 |  |
| 3 | 7 | 20 | 113.89 | 4.29 | 10.05 |  |  | 1 | 4 | 21 | 53.1 | 4.18 | 6.78 |  |
| 5 | 7 | 20 | 39.55 | 4.79 | 6.71 |  |  | 3 | 4 | 21 | 94.64 | 4.13 | 9.31 |  |
| 7 | 7 | 20 | 27.3 | 6.31 | 5.9 |  |  | 0 | 5 | 21 | 22.56 | 5.92 | 3.45 |  |
| 0 | 8 | 20 | 450.3 | 8 | 20.34 |  |  | 2 | 5 | 21 | 80.87 | 4.41 | 9.19 |  |
| 2 | 8 | 20 | 35.73 | 3.96 | 5.9 |  |  | 4 | 5 | 21 | 72.27 | 4.28 | 7.48 |  |
| 4 | 8 | 20 | 329.37 | 5.02 | 18.09 |  |  | 1 | 6 | 21 | 21.85 | 4.24 | 4.23 |  |
| 6 | 8 | 20 | 8.41 | 3.98 | 2.87 |  |  | 3 | 6 | 21 | 96.49 | 4.53 | 9.42 |  |
| 8 | 8 | 20 | 143.93 | 10.51 | 12.4 |  |  | 5 | 6 | 21 | 23.05 | 4.06 | 5.21 |  |
| 1 | 9 | 20 | 13.43 | 5.13 | 3.93 |  |  | 0 | 7 | 21 | 51.21 | 6.08 | 7.31 |  |
| 3 | 9 | 20 | 33.13 | 4.19 | 5.79 |  |  | 2 | 7 | 21 | 35.64 | 4.29 | 5.64 |  |
| 5 | 9 | 20 | 24.29 | 3.56 | 4.64 |  |  | 4 | 7 | 21 | 93.76 | 4.79 | 9.96 |  |
| 7 | 9 | 20 | 12.41 | 5.13 | 3.57 |  |  | 6 | 7 | 21 | 9.61 | 3.89 | 2.69 |  |
| 9 | 9 | 20 | 31.12 | 7.66 | 6.15 |  |  | 1 | 8 | 21 | 34.42 | 4.39 | 5.81 |  |
| 0 | 10 | 20 | 13.13 | 6.08 | 3.08 |  |  | 3 | 8 | 21 | 3.09 | 4.18 | 1.27 |  |
| 2 | 10 | 20 | 38.77 | 5.05 | 5.58 |  |  | 5 | 8 | 21 | 1.34 | 4.01 | 1.28 |  |
| 4 | 10 | 20 | 20.6 | 4.15 | 4.72 |  |  | 7 | 8 | 21 | 8.07 | 5.71 | 2.91 |  |
| 6 | 10 | 20 | 56.79 | 5.35 | 7.37 |  |  | 0 | 9 | 21 | 47.48 | 6.4 | 6.68 |  |
| 8 | 10 | 20 | 49.33 | 7.56 | 7.15 |  |  | 2 | 9 | 21 | 16.58 | 4.4 | 4.39 |  |
| 10 | 10 | 20 | 32.36 | 12.61 | 4.81 |  |  | 4 | 9 | 21 | 49.64 | 4.45 | 7.19 |  |

| h | k | l | Fcal^2 | Fobs^2 | (Fobs^2) | |  | h | k | l | Fcal^2 | Fobs^2 | (Fobs^2) | |
| --- | --- | --- | --- | --- | --- | --- | --- | --- | --- | --- | --- | --- | --- | --- |
|  |  |  |  |  |  |  |  |  |  |  |  |  |  |  |
| 6 | 9 | 21 | 17.84 | 6.78 | 3.76 |  |  | 1 | 9 | 22 | 28.6 | 5.8 | 5.47 |  |
| 8 | 9 | 21 | 23.65 | 14.26 | 4.71 |  |  | 3 | 9 | 22 | 35.19 | 5.14 | 5.83 |  |
| 1 | 10 | 21 | 16.13 | 4.64 | 3.98 |  |  | 5 | 9 | 22 | 8.46 | 6.94 | 2.81 |  |
| 3 | 10 | 21 | 11.28 | 4.89 | 3.41 |  |  | 7 | 9 | 22 | 11.2 | 19.78 | 5.01 |  |
| 5 | 10 | 21 | 38.34 | 5.9 | 5.95 |  |  | 0 | 10 | 22 | 3.55 | 9.35 | 1.01 |  |
| 7 | 10 | 21 | 12.03 | 6.83 | 3.86 |  |  | 2 | 10 | 22 | 85 | 8.52 | 9.59 |  |
| 9 | 10 | 21 | 26.97 | 22.82 | 3.38 |  |  | 4 | 10 | 22 | 16.15 | 6.87 | 4.35 |  |
| 0 | 11 | 21 | 0.26 | 5.76 | 0.21 |  |  | 6 | 10 | 22 | 103.64 | 20.87 | 10.95 |  |
| 2 | 11 | 21 | 27.96 | 6.55 | 5.63 |  |  | 1 | 11 | 22 | 4.25 | 6.64 | 0.5 |  |
| 4 | 11 | 21 | 6.33 | 5.55 | 1.93 |  |  | 3 | 11 | 22 | 1.37 | 9.95 | 2.78 |  |
| 6 | 11 | 21 | 31.89 | 6.77 | 5.24 |  |  | 5 | 11 | 22 | 13.55 | 21.73 | 1.85 |  |
| 8 | 11 | 21 | 22.84 | 13.42 | 4.91 |  |  | 7 | 11 | 22 | 21.03 | 13.56 | 3.62 |  |
| 1 | 12 | 21 | 13.99 | 6.72 | 4.63 |  |  | 2 | 12 | 22 | 1.11 | 10.33 | 1.29 |  |
| 3 | 12 | 21 | 37.99 | 6.67 | 6.59 |  |  | 4 | 12 | 22 | 10.53 | 12.19 | 4.43 |  |
| 5 | 12 | 21 | 23.83 | 10.16 | 4.7 |  |  | 6 | 12 | 22 | 9.41 | 10.27 | 3.39 |  |
| 7 | 12 | 21 | 20.76 | 14.73 | 4.3 |  |  | 3 | 13 | 22 | 1.14 | 8.24 | 2.25 |  |
| 2 | 13 | 21 | 0 | 11.23 | 3.1 |  |  | 2 | 14 | 22 | 30.88 | 19.47 | 7.9 |  |
| 4 | 13 | 21 | 21.07 | 7.05 | 4.83 |  |  | 0 | 1 | 23 | 46.82 | 8.32 | 6.85 |  |
| 8 | 13 | 21 | 10.57 | 25.35 | 1.72 |  |  | 1 | 2 | 23 | 43.19 | 4.69 | 6.47 |  |
| 1 | 14 | 21 | 0 | 24.45 | 2.27 |  |  | 0 | 3 | 23 | 77.63 | 7.04 | 8.78 |  |
| 3 | 14 | 21 | 25.8 | 8.8 | 5.27 |  |  | 2 | 3 | 23 | 11.02 | 4.81 | 3.53 |  |
| 5 | 14 | 21 | 0 | 14.88 | 2.8 |  |  | 1 | 4 | 23 | 14.03 | 5.03 | 3.81 |  |
| 2 | 15 | 21 | 3.77 | 12.68 | 2.62 |  |  | 3 | 4 | 23 | 15.2 | 4.92 | 4.21 |  |
| 4 | 15 | 21 | 12.59 | 10.33 | 4.58 |  |  | 0 | 5 | 23 | 13.83 | 8.32 | 2.6 |  |
| 0 | 0 | 22 | 497.49 | 43.91 | 19.62 |  |  | 2 | 5 | 23 | 39.54 | 5.3 | 6.06 |  |
| 1 | 1 | 22 | 1.97 | 7.52 | 0.56 |  |  | 4 | 5 | 23 | 32.59 | 6.14 | 5.98 |  |
| 0 | 2 | 22 | 20.1 | 5.76 | 3.19 |  |  | 1 | 6 | 23 | 27.73 | 5.15 | 5.18 |  |
| 2 | 2 | 22 | 384.3 | 7.84 | 18.08 |  |  | 3 | 6 | 23 | 4.36 | 5.46 | 3.35 |  |
| 1 | 3 | 22 | 65.85 | 4.47 | 7.54 |  |  | 5 | 6 | 23 | 4.78 | 15.66 | 2.12 |  |
| 3 | 3 | 22 | 62.06 | 5.92 | 8.26 |  |  | 0 | 7 | 23 | 23.83 | 8.64 | 5.08 |  |
| 0 | 4 | 22 | 5.76 | 6.4 | 1.71 |  |  | 2 | 7 | 23 | 23.2 | 7.97 | 4.4 |  |
| 2 | 4 | 22 | 65.56 | 4.24 | 7.1 |  |  | 4 | 7 | 23 | 1.67 | 7.96 | 2.89 |  |
| 4 | 4 | 22 | 70.33 | 6.56 | 8.29 |  |  | 1 | 8 | 23 | 6.24 | 6.59 | 2.94 |  |
| 1 | 5 | 22 | 33.48 | 4.78 | 5.53 |  |  | 3 | 8 | 23 | 7.62 | 10.18 | 4.21 |  |
| 3 | 5 | 22 | 25.31 | 4.69 | 4.46 |  |  | 5 | 8 | 23 | 8.23 | 9.1 | 3.51 |  |
| 5 | 5 | 22 | 41.64 | 7.52 | 6.06 |  |  | 0 | 9 | 23 | 20.46 | 11.19 | 4.82 |  |
| 0 | 6 | 22 | 58.61 | 10.41 | 7.68 |  |  | 2 | 9 | 23 | 13.16 | 9.26 | 3.63 |  |
| 2 | 6 | 22 | 322.39 | 7.08 | 17.19 |  |  | 4 | 9 | 23 | 0 | 32.59 | 2.17 |  |
| 4 | 6 | 22 | 10.89 | 6.31 | 3.25 |  |  | 1 | 10 | 23 | 0 | 12.81 | 1.63 |  |
| 6 | 6 | 22 | 123.59 | 11.04 | 10.93 |  |  | 3 | 10 | 23 | 2.61 | 11.12 | 3.05 |  |
| 1 | 7 | 22 | 62.44 | 4.66 | 7.95 |  |  | 5 | 10 | 23 | 18.71 | 15.97 | 4.32 |  |
| 3 | 7 | 22 | 26.77 | 4.95 | 4.95 |  |  | 4 | 11 | 23 | 9 | 14.54 | 2.96 |  |
| 5 | 7 | 22 | 36.49 | 7.95 | 5.54 |  |  | 3 | 12 | 23 | 5.86 | 19.69 | 2.63 |  |
| 7 | 7 | 22 | 3.98 | 11.01 | 3.6 |  |  | 0 | 0 | 24 | 142.86 | 15.39 | 12.3 |  |
| 0 | 8 | 22 | 8.44 | 5.76 | 3.28 |  |  | 1 | 1 | 24 | 16.1 | 7.68 | 3.92 |  |
| 2 | 8 | 22 | 44.98 | 4.74 | 6.94 |  |  | 0 | 2 | 24 | 21.95 | 11.77 | 4.99 |  |
| 4 | 8 | 22 | 8.96 | 4.73 | 3.32 |  |  | 2 | 2 | 24 | 27.79 | 8.16 | 4.99 |  |
| 6 | 8 | 22 | 25.58 | 6.21 | 4.7 |  |  | 1 | 3 | 24 | 9.75 | 6.4 | 3.6 |  |

| h | k | l | Fcal^2 | Fobs^2 | (Fobs^2) | |  | h | k | l | Fcal^2 | Fobs^2 | (Fobs^2) | |
| --- | --- | --- | --- | --- | --- | --- | --- | --- | --- | --- | --- | --- | --- | --- |
|  |  |  |  |  |  |  |  |  |  |  |  |  |  |  |
| 3 | 3 | 24 | 4.63 | 15.21 | 2.94 |  |  |  |  |  |  |  |  |  |
| 0 | 4 | 24 | 148.96 | 9.76 | 12.36 |  |  |  |  |  |  |  |  |  |
| 2 | 4 | 24 | 11.61 | 7.21 | 2.57 |  |  |  |  |  |  |  |  |  |
| 4 | 4 | 24 | 77.12 | 16.54 | 9.04 |  |  |  |  |  |  |  |  |  |
| 1 | 5 | 24 | 42.64 | 9.18 | 6.59 |  |  |  |  |  |  |  |  |  |
| 3 | 5 | 24 | 13.53 | 6.05 | 2.7 |  |  |  |  |  |  |  |  |  |
| 5 | 5 | 24 | 0.46 | 10.87 | 0.88 |  |  |  |  |  |  |  |  |  |
| 0 | 6 | 24 | 29.54 | 15.17 | 3.93 |  |  |  |  |  |  |  |  |  |
| 2 | 6 | 24 | 3.89 | 10.86 | 3.92 |  |  |  |  |  |  |  |  |  |
| 4 | 6 | 24 | 1.5 | 7.27 | 4.04 |  |  |  |  |  |  |  |  |  |
| 1 | 7 | 24 | 0 | 12.5 | 4.38 |  |  |  |  |  |  |  |  |  |
| 3 | 7 | 24 | 0 | 11.98 | 3.97 |  |  |  |  |  |  |  |  |  |
| 5 | 7 | 24 | 2.34 | 8.3 | 4.55 |  |  |  |  |  |  |  |  |  |
| 0 | 8 | 24 | 76.86 | 13.14 | 9.44 |  |  |  |  |  |  |  |  |  |
| 2 | 8 | 24 | 6.74 | 9.53 | 4.46 |  |  |  |  |  |  |  |  |  |
| 4 | 8 | 24 | 63.54 | 26.83 | 8.45 |  |  |  |  |  |  |  |  |  |
| 1 | 9 | 24 | 0 | 11.15 | 2.36 |  |  |  |  |  |  |  |  |  |
| 0 | 1 | 25 | 16.1 | 11.54 | 3 |  |  |  |  |  |  |  |  |  |
| 1 | 2 | 25 | 0 | 20.25 | 3.4 |  |  |  |  |  |  |  |  |  |
| 0 | 3 | 25 | 28.8 | 23.54 | 4.43 |  |  |  |  |  |  |  |  |  |
| 2 | 3 | 25 | 2.25 | 15.69 | 3.78 |  |  |  |  |  |  |  |  |  |
| 1 | 4 | 25 | 0 | 12.03 | 2.77 |  |  |  |  |  |  |  |  |  |
| 3 | 4 | 25 | 14.12 | 9.48 | 2.67 |  |  |  |  |  |  |  |  |  |
| 0 | 5 | 25 | 3.54 | 27.39 | 2.5 |  |  |  |  |  |  |  |  |  |
| 2 | 5 | 25 | 16.4 | 14.7 | 3.5 |  |  |  |  |  |  |  |  |  |
| 4 | 5 | 25 | 14.37 | 16.3 | 3.28 |  |  |  |  |  |  |  |  |  |
| 5 | 6 | 25 | 0 | 14.94 | 1.55 |  |  |  |  |  |  |  |  |  |
| 6 | 7 | 25 | 0 | 14.03 | 2.82 |  |  |  |  |  |  |  |  |  |
| 0 | 2 | 26 | 0.88 | 14.03 | 1.9 |  |  |  |  |  |  |  |  |  |
| 3 | 3 | 26 | 6.68 | 16.3 | 2.14 |  |  |  |  |  |  |  |  |  |
| 4 | 4 | 26 | 937.4 | 97.33 | 2.29 |  |  |  |  |  |  |  |  |  |
| 5 | 5 | 26 | 0 | 13.13 | 3 |  |  |  |  |  |  |  |  |  |
| 6 | 6 | 26 | 4.48 | 15.84 | 6.85 |  |  |  |  |  |  |  |  |  |
| 2 | 3 | 27 | 7.64 | 18.11 | 2.58 |  |  |  |  |  |  |  |  |  |
| 3 | 4 | 27 | 0 | 14.03 | 1.62 |  |  |  |  |  |  |  |  |  |
| 4 | 5 | 27 | 2.69 | 14.49 | 2.11 |  |  |  |  |  |  |  |  |  |
|  |  |  |  |  |  |  |  |  |  |  |  |  |  |  |
|  |  |  |  |  |  |  |  |  |  |  |  |  |  |  |
|  |  |  |  |  |  |  |  |  |  |  |  |  |  |  |
|  |  |  |  |  |  |  |  |  |  |  |  |  |  |  |
|  |  |  |  |  |  |  |  |  |  |  |  |  |  |  |
|  |  |  |  |  |  |  |  |  |  |  |  |  |  |  |
|  |  |  |  |  |  |  |  |  |  |  |  |  |  |  |
|  |  |  |  |  |  |  |  |  |  |  |  |  |  |  |
|  |  |  |  |  |  |  |  |  |  |  |  |  |  |  |
|  |  |  |  |  |  |  |  |  |  |  |  |  |  |  |
|  |  |  |  |  |  |  |  |  |  |  |  |  |  |  |
|  |  |  |  |  |  |  |  |  |  |  |  |  |  |  |

Crystal 11

| h | k | l | Fcal^2 | Fobs^2 | σ(Fobs^2) | |  | h | k | l | Fcal^2 | Fobs^2 | σ(Fobs^2) | |
| --- | --- | --- | --- | --- | --- | --- | --- | --- | --- | --- | --- | --- | --- | --- |
|  |  |  |  |  |  |  |  |  |  |  |  |  |  |  |
| 0 | 0 | 2 | 41851.92 | 1074.78 | 175.01 |  |  | 1 | 4 | 7 | 5611.74 | 24.89 | 67.62 |  |
| 1 | 1 | 2 | 45862.49 | 317.64 | 216.39 |  |  | 3 | 4 | 7 | 3558.67 | 17.07 | 56.32 |  |
| 0 | 2 | 2 | 18780.81 | 163.18 | 98.05 |  |  | 0 | 5 | 7 | 5033.2 | 60.32 | 65.32 |  |
| 0 | 1 | 3 | 27500.19 | 216.04 | 150.74 |  |  | 2 | 5 | 7 | 2240.07 | 11.58 | 45.02 |  |
| 1 | 2 | 3 | 3561.51 | 17.94 | 59.67 |  |  | 4 | 5 | 7 | 6595.54 | 28.78 | 73.91 |  |
| 0 | 3 | 3 | 4333.5 | 45.64 | 96.9 |  |  | 1 | 6 | 7 | 3785.99 | 18.29 | 60.08 |  |
| 2 | 3 | 3 | 27769.09 | 158.18 | 136.87 |  |  | 3 | 6 | 7 | 7404.67 | 31.05 | 83.43 |  |
| 0 | 0 | 4 | 1005.28 | 22.65 | 26.37 |  |  | 5 | 6 | 7 | 3624.84 | 16.98 | 60.02 |  |
| 1 | 1 | 4 | 10525.89 | 64.35 | 120.08 |  |  | 0 | 7 | 7 | 6627.43 | 63.53 | 78.63 |  |
| 0 | 2 | 4 | 3178.86 | 24.01 | 55.54 |  |  | 2 | 7 | 7 | 4643.89 | 29.77 | 64.36 |  |
| 2 | 2 | 4 | 14404.11 | 86.69 | 125.27 |  |  | 4 | 7 | 7 | 3670.36 | 23.88 | 57.23 |  |
| 1 | 3 | 4 | 24210.87 | 96.94 | 150.49 |  |  | 6 | 7 | 7 | 5104.81 | 32.04 | 66.25 |  |
| 3 | 3 | 4 | 30148.91 | 173.25 | 176.66 |  |  | 0 | 0 | 8 | 46256.82 | 603.77 | 214 |  |
| 0 | 4 | 4 | 109693.55 | 905.14 | 309.7 |  |  | 1 | 1 | 8 | 2305.46 | 17.61 | 41.86 |  |
| 2 | 4 | 4 | 23672.32 | 135.06 | 161.21 |  |  | 0 | 2 | 8 | 1676.84 | 13.45 | 41.99 |  |
| 4 | 4 | 4 | 106810.6 | 1157.2 | 302.53 |  |  | 2 | 2 | 8 | 8589.09 | 51.97 | 97.42 |  |
| 0 | 1 | 5 | 235.35 | 5.89 | 21.03 |  |  | 1 | 3 | 8 | 4355.07 | 24.85 | 65.99 |  |
| 1 | 2 | 5 | 1935.13 | 10.59 | 42.07 |  |  | 3 | 3 | 8 | 3337.48 | 22.97 | 58.27 |  |
| 0 | 3 | 5 | 3766.68 | 28.51 | 60.65 |  |  | 0 | 4 | 8 | 33318.4 | 192.91 | 173.26 |  |
| 2 | 3 | 5 | 16574.14 | 67.39 | 138.79 |  |  | 2 | 4 | 8 | 7624.76 | 31.94 | 82.64 |  |
| 1 | 4 | 5 | 9084.02 | 40.52 | 93.32 |  |  | 4 | 4 | 8 | 24884.94 | 138.22 | 154.77 |  |
| 3 | 4 | 5 | 5740.95 | 30.18 | 69.2 |  |  | 1 | 5 | 8 | 8968.74 | 43.22 | 91.03 |  |
| 0 | 5 | 5 | 9231.44 | 88.26 | 96.85 |  |  | 3 | 5 | 8 | 2177.58 | 10.98 | 43.57 |  |
| 2 | 5 | 5 | 225.17 | 3.48 | 15.75 |  |  | 5 | 5 | 8 | 1998.97 | 15.45 | 40.8 |  |
| 4 | 5 | 5 | 10774.29 | 64.3 | 104.35 |  |  | 0 | 6 | 8 | 8388.48 | 50.97 | 89.62 |  |
| 0 | 0 | 6 | 5849.93 | 83.53 | 67.18 |  |  | 2 | 6 | 8 | 1672.8 | 14.54 | 39.18 |  |
| 1 | 1 | 6 | 5795.66 | 38.85 | 72.28 |  |  | 4 | 6 | 8 | 1214.48 | 7.33 | 33.34 |  |
| 0 | 2 | 6 | 8013.1 | 49.85 | 89.4 |  |  | 6 | 6 | 8 | 2683.47 | 18.89 | 49.15 |  |
| 2 | 2 | 6 | 45305.03 | 250.25 | 195.36 |  |  | 1 | 7 | 8 | 3916.99 | 21.61 | 61.43 |  |
| 1 | 3 | 6 | 2179.18 | 11.32 | 48.14 |  |  | 3 | 7 | 8 | 6465.95 | 30.07 | 79.54 |  |
| 3 | 3 | 6 | 7261.02 | 45.69 | 90.07 |  |  | 5 | 7 | 8 | 4492.39 | 19.91 | 63.89 |  |
| 0 | 4 | 6 | 3407.44 | 24.91 | 58.24 |  |  | 7 | 7 | 8 | 3404.45 | 22.74 | 55.66 |  |
| 2 | 4 | 6 | 7490.91 | 33.38 | 90.15 |  |  | 0 | 8 | 8 | 35704.75 | 305.66 | 179.99 |  |
| 4 | 4 | 6 | 5790.06 | 37.86 | 73.62 |  |  | 2 | 8 | 8 | 5447.34 | 35.2 | 69.98 |  |
| 1 | 5 | 6 | 11562.46 | 70.11 | 106.68 |  |  | 4 | 8 | 8 | 24921.13 | 144.09 | 149.7 |  |
| 3 | 5 | 6 | 7816.3 | 33.32 | 85 |  |  | 6 | 8 | 8 | 4737.56 | 29.47 | 65.14 |  |
| 5 | 5 | 6 | 11608.09 | 68.09 | 106.05 |  |  | 8 | 8 | 8 | 11337.06 | 129.67 | 99.16 |  |
| 0 | 6 | 6 | 7283.57 | 68.99 | 77.49 |  |  | 0 | 1 | 9 | 8539.83 | 53.01 | 95.3 |  |
| 2 | 6 | 6 | 41448.24 | 227.12 | 197.65 |  |  | 1 | 2 | 9 | 7945.82 | 33.69 | 82.53 |  |
| 4 | 6 | 6 | 10291.27 | 60.06 | 97.33 |  |  | 0 | 3 | 9 | 2815.78 | 19.84 | 51.68 |  |
| 6 | 6 | 6 | 50784.93 | 611.56 | 214.4 |  |  | 2 | 3 | 9 | 1872.61 | 11.46 | 42.08 |  |
| 0 | 1 | 7 | 9404.22 | 59.73 | 80.19 |  |  | 1 | 4 | 9 | 2097.32 | 13.47 | 46.3 |  |
| 1 | 2 | 7 | 7140.4 | 31.44 | 85.73 |  |  | 3 | 4 | 9 | 5739.65 | 24.6 | 71.72 |  |
| 0 | 3 | 7 | 1910.4 | 15.05 | 39.16 |  |  | 0 | 5 | 9 | 1542.05 | 12.76 | 37.35 |  |
| 2 | 3 | 7 | 4720.03 | 21.87 | 58.11 |  |  | 2 | 5 | 9 | 4431.34 | 23.9 | 66.12 |  |

| h | k | l | Fcal^2 | Fobs^2 | (Fobs^2) | |  | h | k | l | Fcal^2 | Fobs^2 | (Fobs^2) | |
| --- | --- | --- | --- | --- | --- | --- | --- | --- | --- | --- | --- | --- | --- | --- |
|  |  |  |  |  |  |  |  |  |  |  |  |  |  |  |
| 4 | 5 | 9 | 2684.89 | 14 | 51.86 |  |  | 2 | 10 | 10 | 8590.66 | 59.66 | 90 |  |
| 1 | 6 | 9 | 2644.11 | 17.38 | 46.77 |  |  | 4 | 10 | 10 | 1598.02 | 14.73 | 40 |  |
| 3 | 6 | 9 | 2699.94 | 13.63 | 50.46 |  |  | 6 | 10 | 10 | 9932.41 | 64.93 | 96.29 |  |
| 5 | 6 | 9 | 1185.95 | 7.56 | 32.69 |  |  | 8 | 10 | 10 | 709.6 | 10.55 | 26.42 |  |
| 0 | 7 | 9 | 5124.94 | 34.3 | 66.66 |  |  | 10 | 10 | 10 | 5193.37 | 68.37 | 67.11 |  |
| 2 | 7 | 9 | 5298.57 | 26.91 | 71.77 |  |  | 0 | 1 | 11 | 4311.65 | 27.57 | 63.45 |  |
| 4 | 7 | 9 | 1120.9 | 7.2 | 32.83 |  |  | 1 | 2 | 11 | 3855.49 | 17.43 | 58.7 |  |
| 6 | 7 | 9 | 1801.39 | 10.18 | 40.25 |  |  | 0 | 3 | 11 | 5379.64 | 68.02 | 70.8 |  |
| 1 | 8 | 9 | 2675.36 | 16.32 | 49.82 |  |  | 2 | 3 | 11 | 1690.1 | 10.37 | 39.79 |  |
| 3 | 8 | 9 | 2504.39 | 16.2 | 47.72 |  |  | 1 | 4 | 11 | 539.32 | 4.74 | 21.23 |  |
| 5 | 8 | 9 | 3054.83 | 14.73 | 52.39 |  |  | 3 | 4 | 11 | 3605.38 | 18.32 | 59.01 |  |
| 7 | 8 | 9 | 1284.42 | 9.04 | 34.39 |  |  | 0 | 5 | 11 | 2035.93 | 36.23 | 40.99 |  |
| 0 | 9 | 9 | 3463.07 | 35.34 | 57.8 |  |  | 2 | 5 | 11 | 3725.85 | 17.29 | 58.9 |  |
| 2 | 9 | 9 | 2816.38 | 21.67 | 52.92 |  |  | 4 | 5 | 11 | 2711.99 | 13.46 | 49.69 |  |
| 4 | 9 | 9 | 625.55 | 7.68 | 23.18 |  |  | 1 | 6 | 11 | 2648.09 | 22.14 | 50.41 |  |
| 6 | 9 | 9 | 2214.26 | 17.61 | 44.3 |  |  | 3 | 6 | 11 | 2898.67 | 22.74 | 50.12 |  |
| 8 | 9 | 9 | 801.19 | 9.91 | 27.73 |  |  | 5 | 6 | 11 | 931.61 | 7.01 | 28.37 |  |
| 0 | 0 | 10 | 34988.5 | 391.65 | 169.06 |  |  | 0 | 7 | 11 | 2179.83 | 16.9 | 47.72 |  |
| 1 | 1 | 10 | 1476.22 | 12.38 | 33.55 |  |  | 2 | 7 | 11 | 1483.78 | 9.43 | 36.55 |  |
| 0 | 2 | 10 | 1338.72 | 11.2 | 36.75 |  |  | 4 | 7 | 11 | 3479.78 | 20.12 | 57.02 |  |
| 2 | 2 | 10 | 27848.2 | 156 | 158.09 |  |  | 6 | 7 | 11 | 292.03 | 4.95 | 17.35 |  |
| 1 | 3 | 10 | 3787.75 | 17.14 | 60.58 |  |  | 1 | 8 | 11 | 2450.38 | 13.81 | 47.84 |  |
| 3 | 3 | 10 | 9644.27 | 58.76 | 96.23 |  |  | 3 | 8 | 11 | 39.39 | 5.66 | 4.5 |  |
| 0 | 4 | 10 | 130.82 | 4.12 | 9.97 |  |  | 5 | 8 | 11 | 42.42 | 3.95 | 7.02 |  |
| 2 | 4 | 10 | 6249.31 | 28.43 | 74.77 |  |  | 7 | 8 | 11 | 334.35 | 5.54 | 17.83 |  |
| 4 | 4 | 10 | 6069.96 | 36.23 | 73.36 |  |  | 0 | 9 | 11 | 1000.86 | 13.58 | 32.94 |  |
| 1 | 5 | 10 | 3362.42 | 24.56 | 54.89 |  |  | 2 | 9 | 11 | 762.45 | 7.78 | 26.6 |  |
| 3 | 5 | 10 | 2002.89 | 10.42 | 41.85 |  |  | 4 | 9 | 11 | 1165 | 9.94 | 32.77 |  |
| 5 | 5 | 10 | 1611.45 | 13.12 | 35.11 |  |  | 6 | 9 | 11 | 849.48 | 8.64 | 28.72 |  |
| 0 | 6 | 10 | 2558.87 | 18.55 | 50.48 |  |  | 8 | 9 | 11 | 1396.37 | 10.18 | 35.75 |  |
| 2 | 6 | 10 | 26638.71 | 140.39 | 155.2 |  |  | 1 | 10 | 11 | 283.05 | 7.87 | 17.04 |  |
| 4 | 6 | 10 | 1434.91 | 8.47 | 35.7 |  |  | 3 | 10 | 11 | 804.68 | 10.11 | 27.68 |  |
| 6 | 6 | 10 | 9034.54 | 53.89 | 90.02 |  |  | 5 | 10 | 11 | 694.97 | 6.9 | 26.05 |  |
| 1 | 7 | 10 | 3608.05 | 19.78 | 58.12 |  |  | 7 | 10 | 11 | 964.69 | 11.97 | 29.83 |  |
| 3 | 7 | 10 | 1154.04 | 21 | 35.3 |  |  | 9 | 10 | 11 | 671.03 | 8.01 | 24.31 |  |
| 5 | 7 | 10 | 1811.81 | 12.58 | 42.42 |  |  | 2 | 11 | 11 | 1164.43 | 14.73 | 32.87 |  |
| 7 | 7 | 10 | 1064.04 | 11.53 | 31.64 |  |  | 4 | 11 | 11 | 186.95 | 7.68 | 13.88 |  |
| 0 | 8 | 10 | 2760.78 | 21.46 | 51.72 |  |  | 6 | 11 | 11 | 1286.52 | 14.4 | 36.15 |  |
| 2 | 8 | 10 | 2721.18 | 14.26 | 51.13 |  |  | 8 | 11 | 11 | 1488.9 | 16.01 | 36.32 |  |
| 4 | 8 | 10 | 641.72 | 5.74 | 23.54 |  |  | 10 | 11 | 11 | 337.31 | 9.6 | 17.39 |  |
| 6 | 8 | 10 | 1745.95 | 10.64 | 39.73 |  |  | 0 | 0 | 12 | 17734.24 | 239.41 | 131.3 |  |
| 8 | 8 | 10 | 1132.12 | 12.12 | 32.77 |  |  | 1 | 1 | 12 | 2494.84 | 17.61 | 47.24 |  |
| 1 | 9 | 10 | 1801.04 | 11.66 | 40.73 |  |  | 0 | 2 | 12 | 3824.39 | 24.35 | 59.57 |  |
| 3 | 9 | 10 | 1254.07 | 15.85 | 34.25 |  |  | 2 | 2 | 12 | 2438.17 | 17.54 | 46.46 |  |
| 5 | 9 | 10 | 1707 | 10.3 | 38.43 |  |  | 1 | 3 | 12 | 1628.79 | 9.04 | 40.75 |  |
| 7 | 9 | 10 | 818.31 | 7.56 | 28.92 |  |  | 3 | 3 | 12 | 1460.87 | 12.76 | 37.36 |  |
| 9 | 9 | 10 | 729.05 | 10.55 | 25.17 |  |  | 0 | 4 | 12 | 16750.82 | 94.83 | 124.81 |  |
| 0 | 10 | 10 | 525.11 | 13.58 | 22.19 |  |  | 2 | 4 | 12 | 1104.09 | 8.74 | 30.28 |  |

| h | k | l | Fcal^2 | Fobs^2 | (Fobs^2) | |  | h | k | l | Fcal^2 | Fobs^2 | (Fobs^2) | |
| --- | --- | --- | --- | --- | --- | --- | --- | --- | --- | --- | --- | --- | --- | --- |
|  |  |  |  |  |  |  |  |  |  |  |  |  |  |  |
| 4 | 4 | 12 | 21021.13 | 133.14 | 138.97 |  |  | 2 | 5 | 13 | 4509.97 | 22.65 | 65.77 |  |
| 1 | 5 | 12 | 2997.23 | 22.45 | 53.04 |  |  | 4 | 5 | 13 | 1625.59 | 10.18 | 37.51 |  |
| 3 | 5 | 12 | 2482.37 | 19.02 | 49.15 |  |  | 1 | 6 | 13 | 1358.41 | 10.33 | 35.23 |  |
| 5 | 5 | 12 | 2235.75 | 17.61 | 43.52 |  |  | 3 | 6 | 13 | 607.02 | 16.43 | 24.65 |  |
| 0 | 6 | 12 | 470.4 | 7.98 | 21 |  |  | 5 | 6 | 13 | 97.84 | 4.79 | 8.78 |  |
| 2 | 6 | 12 | 2898.17 | 21.95 | 51.73 |  |  | 0 | 7 | 13 | 1147.23 | 21.74 | 33.56 |  |
| 4 | 6 | 12 | 3876.39 | 23.36 | 62.45 |  |  | 2 | 7 | 13 | 1489.8 | 10.36 | 39.13 |  |
| 6 | 6 | 12 | 17.94 | 8.15 | 3.18 |  |  | 4 | 7 | 13 | 736.99 | 15.48 | 26.91 |  |
| 1 | 7 | 12 | 259.75 | 5.93 | 16.38 |  |  | 6 | 7 | 13 | 671.58 | 7.01 | 25.37 |  |
| 3 | 7 | 12 | 1547.98 | 10.44 | 38.23 |  |  | 1 | 8 | 13 | 1449.69 | 13.78 | 37.29 |  |
| 5 | 7 | 12 | 872.5 | 8.49 | 30.02 |  |  | 3 | 8 | 13 | 91.15 | 5.48 | 8.87 |  |
| 7 | 7 | 12 | 726.52 | 9.6 | 25.45 |  |  | 5 | 8 | 13 | 32.1 | 6.29 | 6.17 |  |
| 0 | 8 | 12 | 8859.21 | 89.83 | 90.36 |  |  | 7 | 8 | 13 | 902.82 | 11.45 | 28.63 |  |
| 2 | 8 | 12 | 746.97 | 8.33 | 27.08 |  |  | 0 | 9 | 13 | 1137.53 | 14.04 | 32.83 |  |
| 4 | 8 | 12 | 5251.31 | 27.02 | 68.87 |  |  | 2 | 9 | 13 | 142.68 | 5.27 | 11.22 |  |
| 6 | 8 | 12 | 151.88 | 5.05 | 11.78 |  |  | 4 | 9 | 13 | 786.22 | 10.46 | 27.82 |  |
| 8 | 8 | 12 | 6652.97 | 51.9 | 78.79 |  |  | 6 | 9 | 13 | 1369.02 | 14.33 | 35.46 |  |
| 1 | 9 | 12 | 312.66 | 6.19 | 17.51 |  |  | 8 | 9 | 13 | 699.17 | 8.13 | 25.68 |  |
| 3 | 9 | 12 | 1493.85 | 13.3 | 36.98 |  |  | 1 | 10 | 13 | 610.71 | 15 | 24.5 |  |
| 5 | 9 | 12 | 905.25 | 10.87 | 28.93 |  |  | 3 | 10 | 13 | 1102.87 | 10.4 | 32.4 |  |
| 7 | 9 | 12 | 919.49 | 9.91 | 29.73 |  |  | 5 | 10 | 13 | 694.39 | 8.07 | 26.63 |  |
| 9 | 9 | 12 | 518.59 | 10.55 | 22.61 |  |  | 7 | 10 | 13 | 247.52 | 7.95 | 14.48 |  |
| 0 | 10 | 12 | 243.78 | 8.63 | 15.96 |  |  | 9 | 10 | 13 | 200.94 | 7.01 | 13.45 |  |
| 2 | 10 | 12 | 189.24 | 5.99 | 14.58 |  |  | 2 | 11 | 13 | 475.74 | 8.88 | 21.34 |  |
| 4 | 10 | 12 | 966.66 | 9.17 | 31.48 |  |  | 4 | 11 | 13 | 996.48 | 10.63 | 31.01 |  |
| 6 | 10 | 12 | 1137.23 | 20.15 | 32.7 |  |  | 6 | 11 | 13 | 592.31 | 10.12 | 23.58 |  |
| 8 | 10 | 12 | 853.55 | 11.79 | 27.87 |  |  | 8 | 11 | 13 | 110.36 | 5.94 | 10.83 |  |
| 10 | 10 | 12 | 643.16 | 11.83 | 23.63 |  |  | 10 | 11 | 13 | 314.13 | 7.86 | 17.37 |  |
| 1 | 11 | 12 | 1176.62 | 13.76 | 34.5 |  |  | 1 | 12 | 13 | 414.03 | 8.86 | 19.88 |  |
| 3 | 11 | 12 | 1423.72 | 14.79 | 37.42 |  |  | 3 | 12 | 13 | 495.65 | 8.69 | 22.35 |  |
| 5 | 11 | 12 | 855.43 | 9.14 | 29.12 |  |  | 5 | 12 | 13 | 460.31 | 11.24 | 21.88 |  |
| 7 | 11 | 12 | 418.31 | 6.55 | 20.46 |  |  | 7 | 12 | 13 | 490.83 | 9.11 | 21.25 |  |
| 9 | 11 | 12 | 211.7 | 6.79 | 14.3 |  |  | 9 | 12 | 13 | 319.48 | 7.91 | 17.05 |  |
| 11 | 11 | 12 | 217.71 | 9.91 | 14.38 |  |  | 11 | 12 | 13 | 191.52 | 9.22 | 14.4 |  |
| 0 | 12 | 12 | 3531.4 | 43.49 | 57.8 |  |  | 0 | 13 | 13 | 293.52 | 17.2 | 17.78 |  |
| 2 | 12 | 12 | 1405.08 | 16.96 | 36.39 |  |  | 2 | 13 | 13 | 204.25 | 10.24 | 14.65 |  |
| 4 | 12 | 12 | 6788.82 | 60.01 | 79.52 |  |  | 4 | 13 | 13 | 256.59 | 10.88 | 16.48 |  |
| 6 | 12 | 12 | 285.07 | 8.48 | 18.62 |  |  | 6 | 13 | 13 | 533.3 | 13.4 | 21.9 |  |
| 8 | 12 | 12 | 2593.6 | 24.6 | 48.86 |  |  | 8 | 13 | 13 | 88.24 | 8.63 | 10.56 |  |
| 10 | 12 | 12 | 238.8 | 10.24 | 14.16 |  |  | 10 | 13 | 13 | 183.49 | 11.52 | 13.68 |  |
| 12 | 12 | 12 | 1747.4 | 35.44 | 42.83 |  |  | 12 | 13 | 13 | 139.61 | 11.47 | 11.53 |  |
| 0 | 1 | 13 | 938.35 | 11.77 | 28.3 |  |  | 0 | 0 | 14 | 487.39 | 17.21 | 24.94 |  |
| 1 | 2 | 13 | 722.08 | 6.1 | 25.05 |  |  | 1 | 1 | 14 | 3382.25 | 24.32 | 53.95 |  |
| 0 | 3 | 13 | 1306.41 | 11.53 | 37.12 |  |  | 0 | 2 | 14 | 1878.81 | 15.37 | 42.07 |  |
| 2 | 3 | 13 | 2131.26 | 13.5 | 44.64 |  |  | 2 | 2 | 14 | 12177.09 | 85.22 | 104.74 |  |
| 1 | 4 | 13 | 2746.05 | 14.03 | 51.37 |  |  | 1 | 3 | 14 | 1995.53 | 12.95 | 44.82 |  |
| 3 | 4 | 13 | 1880.5 | 10.87 | 41.82 |  |  | 3 | 3 | 14 | 541.48 | 8.96 | 23.72 |  |
| 0 | 5 | 13 | 171.51 | 18.56 | 12.25 |  |  | 0 | 4 | 14 | 2495.11 | 44.84 | 48.06 |  |

| h | k | l | Fcal^2 | Fobs^2 | (Fobs^2) | |  | h | k | l | Fcal^2 | Fobs^2 | (Fobs^2) | |
| --- | --- | --- | --- | --- | --- | --- | --- | --- | --- | --- | --- | --- | --- | --- |
|  |  |  |  |  |  |  |  |  |  |  |  |  |  |  |
| 2 | 4 | 14 | 1120.58 | 10.49 | 33.91 |  |  | 13 | 13 | 14 | 66.08 | 20.82 | 7.85 |  |
| 4 | 4 | 14 | 1152.33 | 12.12 | 32.18 |  |  | 2 | 14 | 14 | 1371.94 | 19.52 | 37.96 |  |
| 1 | 5 | 14 | 92.63 | 5.44 | 9.58 |  |  | 4 | 14 | 14 | 482.6 | 14.4 | 21.3 |  |
| 3 | 5 | 14 | 666.42 | 6.67 | 26.37 |  |  | 6 | 14 | 14 | 1928.94 | 24.65 | 43.12 |  |
| 5 | 5 | 14 | 3366.96 | 25.89 | 56.23 |  |  | 8 | 14 | 14 | 57.26 | 12.11 | 8.76 |  |
| 0 | 6 | 14 | 596.09 | 9.6 | 24.86 |  |  | 10 | 14 | 14 | 576.49 | 16.24 | 25.87 |  |
| 2 | 6 | 14 | 8047.5 | 50.97 | 85.39 |  |  | 14 | 14 | 14 | 237.77 | 68.81 | 18.3 |  |
| 4 | 6 | 14 | 490.85 | 7.52 | 21.24 |  |  | 0 | 1 | 15 | 231.34 | 7.68 | 16.88 |  |
| 6 | 6 | 14 | 4573.65 | 35.18 | 64.83 |  |  | 1 | 2 | 15 | 760.47 | 8.53 | 27.13 |  |
| 1 | 7 | 14 | 854.39 | 8.18 | 29.77 |  |  | 0 | 3 | 15 | 1988.64 | 18.57 | 42.61 |  |
| 3 | 7 | 14 | 290.86 | 7.13 | 17.62 |  |  | 2 | 3 | 15 | 718.22 | 7.22 | 26.84 |  |
| 5 | 7 | 14 | 425.14 | 7.7 | 19.71 |  |  | 1 | 4 | 15 | 789.25 | 16 | 26.45 |  |
| 7 | 7 | 14 | 1151.6 | 13.76 | 32.91 |  |  | 3 | 4 | 15 | 239.12 | 6.63 | 14.67 |  |
| 0 | 8 | 14 | 1012.86 | 12.62 | 30.44 |  |  | 0 | 5 | 15 | 378.67 | 28.52 | 20.57 |  |
| 2 | 8 | 14 | 815.77 | 8.53 | 28.08 |  |  | 2 | 5 | 15 | 658.49 | 9.11 | 25.93 |  |
| 4 | 8 | 14 | 296.31 | 6.64 | 17.1 |  |  | 4 | 5 | 15 | 1475.45 | 14.47 | 38.23 |  |
| 6 | 8 | 14 | 750.02 | 27.36 | 26.49 |  |  | 1 | 6 | 15 | 898.93 | 9.15 | 28.79 |  |
| 8 | 8 | 14 | 518.17 | 10.24 | 21.86 |  |  | 3 | 6 | 15 | 1078.72 | 15.41 | 32.57 |  |
| 1 | 9 | 14 | 1529.69 | 35.05 | 38.7 |  |  | 5 | 6 | 15 | 186.86 | 5.51 | 13.67 |  |
| 3 | 9 | 14 | 440.66 | 8.76 | 21.07 |  |  | 0 | 7 | 15 | 957.76 | 12.62 | 30.23 |  |
| 5 | 9 | 14 | 92.81 | 5.68 | 9.5 |  |  | 2 | 7 | 15 | 677.46 | 12.47 | 25.9 |  |
| 7 | 9 | 14 | 627.01 | 18.22 | 24.1 |  |  | 4 | 7 | 15 | 421.55 | 6.96 | 19.41 |  |
| 9 | 9 | 14 | 748.12 | 12.81 | 25.87 |  |  | 6 | 7 | 15 | 613.11 | 7.96 | 24.39 |  |
| 0 | 10 | 14 | 1225.83 | 62.03 | 34.56 |  |  | 1 | 8 | 15 | 935.04 | 11.26 | 29.78 |  |
| 2 | 10 | 14 | 4610.5 | 54.12 | 65.81 |  |  | 3 | 8 | 15 | 849.13 | 13.6 | 29.01 |  |
| 4 | 10 | 14 | 258.63 | 7.08 | 16.17 |  |  | 5 | 8 | 15 | 571.81 | 9.62 | 21.56 |  |
| 6 | 10 | 14 | 3529.85 | 30.49 | 57.35 |  |  | 7 | 8 | 15 | 545.72 | 9.14 | 22.83 |  |
| 8 | 10 | 14 | 355.63 | 7.57 | 18.62 |  |  | 0 | 9 | 15 | 966.94 | 42.56 | 30.08 |  |
| 10 | 10 | 14 | 1686.39 | 19.21 | 40.17 |  |  | 2 | 9 | 15 | 486.24 | 9.78 | 21.75 |  |
| 1 | 11 | 14 | 217.27 | 7.24 | 14.26 |  |  | 4 | 9 | 15 | 46.85 | 7.07 | 7.92 |  |
| 3 | 11 | 14 | 789.59 | 10.05 | 28.11 |  |  | 6 | 9 | 15 | 602.34 | 9.3 | 23.57 |  |
| 5 | 11 | 14 | 625.66 | 15.64 | 24.92 |  |  | 8 | 9 | 15 | 333.52 | 10.23 | 18.12 |  |
| 7 | 11 | 14 | 251.8 | 14.07 | 16.3 |  |  | 1 | 10 | 15 | 842.22 | 20.12 | 28.45 |  |
| 9 | 11 | 14 | 94.59 | 7.44 | 9.78 |  |  | 3 | 10 | 15 | 83.78 | 9.08 | 10.13 |  |
| 11 | 11 | 14 | 51.56 | 10.24 | 8.03 |  |  | 5 | 10 | 15 | 328.93 | 7.3 | 17.53 |  |
| 0 | 12 | 14 | 144.38 | 10.88 | 12.74 |  |  | 7 | 10 | 15 | 205.9 | 15.26 | 14.47 |  |
| 2 | 12 | 14 | 397.03 | 8.24 | 19.33 |  |  | 9 | 10 | 15 | 124.29 | 7.01 | 11.54 |  |
| 4 | 12 | 14 | 294.71 | 8.13 | 16.95 |  |  | 0 | 11 | 15 | 177.07 | 10.55 | 13.78 |  |
| 6 | 12 | 14 | 330.74 | 9.59 | 18.12 |  |  | 2 | 11 | 15 | 287.07 | 10.44 | 16.92 |  |
| 8 | 12 | 14 | 154.83 | 11.21 | 13.16 |  |  | 4 | 11 | 15 | 695.37 | 10.18 | 25.54 |  |
| 10 | 12 | 14 | 85.37 | 7.3 | 9.6 |  |  | 6 | 11 | 15 | 73.3 | 6.44 | 9.17 |  |
| 12 | 12 | 14 | 175.07 | 12.11 | 13.43 |  |  | 8 | 11 | 15 | 70.05 | 8.17 | 9.29 |  |
| 1 | 13 | 14 | 238.14 | 8.03 | 15.8 |  |  | 10 | 11 | 15 | 195.64 | 7.7 | 14.11 |  |
| 3 | 13 | 14 | 311.01 | 8.6 | 17.52 |  |  | 1 | 12 | 15 | 52.28 | 6.9 | 7.51 |  |
| 5 | 13 | 14 | 273.51 | 8.82 | 16.25 |  |  | 3 | 12 | 15 | 343.22 | 8.92 | 17.68 |  |
| 7 | 13 | 14 | 141.79 | 8.23 | 12.43 |  |  | 5 | 12 | 15 | 220.44 | 9.05 | 13.94 |  |
| 9 | 13 | 14 | 80.39 | 6.67 | 9.89 |  |  | 7 | 12 | 15 | 92.96 | 11.4 | 10.19 |  |
| 11 | 13 | 14 | 79.87 | 8.41 | 9.15 |  |  | 9 | 12 | 15 | 81.23 | 8.11 | 9.45 |  |

| h | k | l | Fcal^2 | Fobs^2 | (Fobs^2) | |  | h | k | l | Fcal^2 | Fobs^2 | (Fobs^2) | |
| --- | --- | --- | --- | --- | --- | --- | --- | --- | --- | --- | --- | --- | --- | --- |
|  |  |  |  |  |  |  |  |  |  |  |  |  |  |  |
| 11 | 12 | 15 | 67.47 | 7.63 | 8.7 |  |  | 9 | 9 | 16 | 178.97 | 10.24 | 13.29 |  |
| 0 | 13 | 15 | 332.62 | 12.16 | 18.17 |  |  | 0 | 10 | 16 | 256.3 | 11.19 | 15.98 |  |
| 2 | 13 | 15 | 140.41 | 8.11 | 12.03 |  |  | 2 | 10 | 16 | 367.01 | 19.35 | 19.14 |  |
| 4 | 13 | 15 | 121.71 | 8.03 | 11.15 |  |  | 4 | 10 | 16 | 283.37 | 13.92 | 17.52 |  |
| 6 | 13 | 15 | 210.47 | 9.04 | 14.13 |  |  | 8 | 10 | 16 | 263.07 | 10.55 | 16.01 |  |
| 8 | 13 | 15 | 150.06 | 22.19 | 13.84 |  |  | 10 | 10 | 16 | 201.12 | 11.19 | 14.77 |  |
| 10 | 13 | 15 | 32.33 | 7.39 | 7.1 |  |  | 1 | 11 | 16 | 401.45 | 9.04 | 19.82 |  |
| 12 | 13 | 15 | 54.66 | 9.69 | 8.83 |  |  | 5 | 11 | 16 | 137.75 | 22.53 | 13.16 |  |
| 1 | 14 | 15 | 56.7 | 8.58 | 8.54 |  |  | 7 | 11 | 16 | 252.77 | 14.23 | 15.61 |  |
| 3 | 14 | 15 | 140.71 | 8.58 | 11.78 |  |  | 9 | 11 | 16 | 87.08 | 9.43 | 10.48 |  |
| 5 | 14 | 15 | 243.9 | 11.43 | 15.08 |  |  | 0 | 12 | 16 | 904.97 | 16.65 | 31.5 |  |
| 7 | 14 | 15 | 181.42 | 9.39 | 13.03 |  |  | 2 | 12 | 16 | 73.71 | 8.86 | 8.9 |  |
| 9 | 14 | 15 | 67.39 | 9.02 | 8.99 |  |  | 4 | 12 | 16 | 1781.78 | 21.35 | 41.92 |  |
| 0 | 15 | 15 | 97.54 | 18.11 | 10.84 |  |  | 6 | 12 | 16 | 306.37 | 9.73 | 16.89 |  |
| 2 | 15 | 15 | 156.68 | 12.16 | 12.93 |  |  | 8 | 12 | 16 | 830.24 | 15.77 | 30.23 |  |
| 4 | 15 | 15 | 64.59 | 12.11 | 8.63 |  |  | 12 | 12 | 16 | 203.04 | 18.53 | 16.68 |  |
| 6 | 15 | 15 | 74.56 | 12.76 | 10.16 |  |  | 1 | 13 | 16 | 67.67 | 8.58 | 9.16 |  |
| 8 | 15 | 15 | 113.3 | 14.95 | 10.59 |  |  | 3 | 13 | 16 | 130 | 8.57 | 11.26 |  |
| 10 | 15 | 15 | 95.19 | 24.45 | 9.91 |  |  | 5 | 13 | 16 | 351.71 | 10.29 | 18.06 |  |
| 0 | 0 | 16 | 6602.69 | 98.84 | 80.57 |  |  | 7 | 13 | 16 | 168.3 | 10.39 | 12.85 |  |
| 1 | 1 | 16 | 2244.52 | 19.83 | 46.68 |  |  | 0 | 14 | 16 | 154.36 | 13.75 | 13.66 |  |
| 0 | 2 | 16 | 1174.57 | 13.12 | 34.56 |  |  | 2 | 14 | 16 | 82.07 | 8.71 | 9.45 |  |
| 2 | 2 | 16 | 397.09 | 8.96 | 19.24 |  |  | 4 | 14 | 16 | 123.63 | 10.47 | 11.29 |  |
| 1 | 3 | 16 | 431.28 | 7.62 | 22.46 |  |  | 6 | 14 | 16 | 95.78 | 9.43 | 10.55 |  |
| 3 | 3 | 16 | 943.42 | 12.17 | 31.26 |  |  | 8 | 14 | 16 | 47.31 | 9.8 | 7.86 |  |
| 0 | 4 | 16 | 4610.09 | 56.65 | 66.82 |  |  | 10 | 14 | 16 | 58.02 | 19.01 | 7.88 |  |
| 2 | 4 | 16 | 457.1 | 12.64 | 21.5 |  |  | 1 | 15 | 16 | 90.87 | 8.93 | 9.8 |  |
| 4 | 4 | 16 | 3977.11 | 34.6 | 60.21 |  |  | 3 | 15 | 16 | 93.09 | 9.27 | 10.05 |  |
| 1 | 5 | 16 | 425.12 | 19.36 | 20.95 |  |  | 5 | 15 | 16 | 103 | 9.73 | 10.29 |  |
| 3 | 5 | 16 | 339.47 | 6.44 | 19.12 |  |  | 7 | 15 | 16 | 90.19 | 15.68 | 9.56 |  |
| 5 | 5 | 16 | 95.31 | 7.68 | 9 |  |  | 9 | 15 | 16 | 62.41 | 11.02 | 8.74 |  |
| 0 | 6 | 16 | 647.42 | 15.85 | 25.64 |  |  | 0 | 16 | 16 | 940.52 | 30.79 | 31.06 |  |
| 2 | 6 | 16 | 715.27 | 9.94 | 25.85 |  |  | 4 | 16 | 16 | 328.35 | 17.6 | 20.31 |  |
| 4 | 6 | 16 | 87.43 | 5.05 | 9.86 |  |  | 6 | 16 | 16 | 105.48 | 18.53 | 10.25 |  |
| 6 | 6 | 16 | 712.17 | 11.83 | 25.9 |  |  | 8 | 16 | 16 | 412.45 | 22.16 | 23.1 |  |
| 1 | 7 | 16 | 608.7 | 9 | 24.77 |  |  | 0 | 1 | 17 | 294.29 | 9.27 | 15.78 |  |
| 3 | 7 | 16 | 543.65 | 9.52 | 23.02 |  |  | 1 | 2 | 17 | 652.91 | 9.7 | 25.05 |  |
| 5 | 7 | 16 | 202.2 | 12.29 | 15.05 |  |  | 0 | 3 | 17 | 490.59 | 22.18 | 23.06 |  |
| 7 | 7 | 16 | 301.36 | 9.27 | 17.45 |  |  | 2 | 3 | 17 | 211.27 | 6.1 | 14.88 |  |
| 0 | 8 | 16 | 7596.33 | 152.78 | 81.68 |  |  | 1 | 4 | 17 | 138.61 | 7.57 | 12.54 |  |
| 2 | 8 | 16 | 731.75 | 8.83 | 27.04 |  |  | 3 | 4 | 17 | 184.08 | 6.1 | 13.84 |  |
| 4 | 8 | 16 | 2226.78 | 15.85 | 46.95 |  |  | 0 | 5 | 17 | 1010.59 | 37.58 | 30.86 |  |
| 6 | 8 | 16 | 382.67 | 10.48 | 19.9 |  |  | 2 | 5 | 17 | 174.35 | 7.36 | 13.99 |  |
| 8 | 8 | 16 | 2978.09 | 29.01 | 51.92 |  |  | 4 | 5 | 17 | 586.1 | 17.51 | 23.8 |  |
| 1 | 9 | 16 | 714.03 | 22.81 | 26.48 |  |  | 1 | 6 | 17 | 627.03 | 8.68 | 24.55 |  |
| 3 | 9 | 16 | 269.17 | 9.38 | 17.06 |  |  | 3 | 6 | 17 | 908.74 | 10.41 | 28.86 |  |
| 5 | 9 | 16 | 690.65 | 9.29 | 25.8 |  |  | 5 | 6 | 17 | 256.49 | 8.97 | 16.02 |  |
| 7 | 9 | 16 | 493.12 | 10.88 | 22.25 |  |  | 0 | 7 | 17 | 824.88 | 24.45 | 28.05 |  |

| h | k | l | Fcal^2 | Fobs^2 | (Fobs^2) | |  | h | k | l | Fcal^2 | Fobs^2 | (Fobs^2) | |
| --- | --- | --- | --- | --- | --- | --- | --- | --- | --- | --- | --- | --- | --- | --- |
|  |  |  |  |  |  |  |  |  |  |  |  |  |  |  |
| 2 | 7 | 17 | 386.32 | 7.74 | 19.27 |  |  | 1 | 5 | 18 | 355.68 | 19.25 | 21.1 |  |
| 4 | 7 | 17 | 82.27 | 6.29 | 8.66 |  |  | 3 | 5 | 18 | 316.9 | 9.46 | 17.63 |  |
| 6 | 7 | 17 | 282 | 7.1 | 16.67 |  |  | 5 | 5 | 18 | 323.83 | 10.55 | 18.56 |  |
| 1 | 8 | 17 | 591.71 | 10.71 | 23.95 |  |  | 0 | 6 | 18 | 130.75 | 9.78 | 12 |  |
| 3 | 8 | 17 | 511.57 | 8.84 | 21.59 |  |  | 2 | 6 | 18 | 2767.07 | 19.88 | 51.57 |  |
| 5 | 8 | 17 | 355.89 | 8.11 | 18.56 |  |  | 4 | 6 | 18 | 393.19 | 10.79 | 19.78 |  |
| 7 | 8 | 17 | 157.55 | 7.84 | 12.96 |  |  | 6 | 6 | 18 | 1486.09 | 17.79 | 39.42 |  |
| 0 | 9 | 17 | 290.25 | 13.58 | 16.66 |  |  | 1 | 7 | 18 | 387.16 | 8.57 | 19.42 |  |
| 2 | 9 | 17 | 444.01 | 14.13 | 20.91 |  |  | 3 | 7 | 18 | 92.88 | 7.29 | 10.24 |  |
| 4 | 9 | 17 | 73.08 | 8.36 | 8.09 |  |  | 5 | 7 | 18 | 196.58 | 9.32 | 14.4 |  |
| 6 | 9 | 17 | 184.75 | 9.05 | 13.34 |  |  | 7 | 7 | 18 | 180.67 | 9.91 | 14.04 |  |
| 8 | 9 | 17 | 141.54 | 9.12 | 12.35 |  |  | 0 | 8 | 18 | 576.18 | 15.85 | 22.93 |  |
| 1 | 10 | 17 | 408.36 | 9.71 | 20.13 |  |  | 2 | 8 | 18 | 215.83 | 7.2 | 14.02 |  |
| 3 | 10 | 17 | 42.09 | 9.04 | 6.14 |  |  | 4 | 8 | 18 | 141.88 | 7.5 | 11.83 |  |
| 5 | 10 | 17 | 124.6 | 9.49 | 11.42 |  |  | 6 | 8 | 18 | 123.4 | 7.67 | 12.31 |  |
| 7 | 10 | 17 | 140.55 | 12.3 | 12.2 |  |  | 1 | 9 | 18 | 174.61 | 7.74 | 13.24 |  |
| 9 | 10 | 17 | 95.46 | 7.44 | 10.81 |  |  | 3 | 9 | 18 | 127.96 | 8.88 | 12.43 |  |
| 0 | 11 | 17 | 85.02 | 10.88 | 9.75 |  |  | 5 | 9 | 18 | 135.18 | 10.08 | 12.78 |  |
| 2 | 11 | 17 | 168.26 | 8.5 | 12.81 |  |  | 7 | 9 | 18 | 117.63 | 7.97 | 11.17 |  |
| 4 | 11 | 17 | 267.11 | 9.04 | 16.31 |  |  | 9 | 9 | 18 | 78.31 | 10.66 | 9.59 |  |
| 8 | 11 | 17 | 170.04 | 8.9 | 13.46 |  |  | 0 | 10 | 18 | 312.12 | 24.45 | 18.16 |  |
| 10 | 11 | 17 | 122.39 | 9.1 | 11.89 |  |  | 2 | 10 | 18 | 1366.89 | 16.1 | 37.89 |  |
| 1 | 12 | 17 | 55.18 | 8.69 | 7.57 |  |  | 4 | 10 | 18 | 125.03 | 11.47 | 11.96 |  |
| 3 | 12 | 17 | 298.6 | 13.04 | 16.66 |  |  | 6 | 10 | 18 | 840.78 | 16.18 | 30.93 |  |
| 5 | 12 | 17 | 58.07 | 8.48 | 7.92 |  |  | 8 | 10 | 18 | 54.15 | 7.92 | 7.97 |  |
| 7 | 12 | 17 | 35.66 | 7.89 | 6.84 |  |  | 10 | 10 | 18 | 607.34 | 18.44 | 26.89 |  |
| 9 | 12 | 17 | 39.17 | 8.38 | 7.55 |  |  | 1 | 11 | 18 | 97.72 | 8.46 | 10.45 |  |
[truncated: 63,743 more chars]
